# Supplementary material for: Characterization of the Mycovirome from the Plant-Pathogenic Fungus Cercospora beticola
Source: MDPI journal article supplement (doi:10.3390/v13101915), 2021-09-24
Supplement: s1 [file s1]

**Table S5. Pairwise alignments of sequences assigned to the same virus**

| <b>Virus name</b> | <b>Representative contig sequence</b> | <b>Contig of subject sequence</b> | <b>Nucleotide identity (%)</b> | <b>aa identity (%)</b> |
|-------------------|---------------------------------------|-----------------------------------|--------------------------------|------------------------|
| CbHV1             | contig1357                            | contig340                         | 89.73                          | 92.88                  |
|                   |                                       | k141-14799                        | 89.97                          | 98.54                  |
|                   |                                       | k141-5852                         | 91.58                          | 98.35                  |
|                   |                                       | contig1993                        | 91.34                          | 98.59                  |
|                   |                                       | k141-48216                        | 86.48                          | 97.01                  |
|                   |                                       | k141-31123                        | 87.69                          | 94.28                  |
|                   |                                       | k141-35317                        | 95.33                          | 99.97                  |
|                   |                                       | contig2265                        | 94.71                          | 98.4                   |
|                   |                                       | contig3558                        | 88.41                          | 98.4                   |
|                   |                                       | contig4473                        | 77.47                          | 93.87                  |
|                   |                                       | k141-56835                        | 81.7                           | 94.24                  |
|                   |                                       | k141-9569                         | 97.41                          | 99.24                  |
|                   |                                       | k141-13420                        | 83.72                          | 86.53                  |
|                   |                                       | contig2550                        | 86.15                          | 91.71                  |
|                   |                                       | contig3466                        | 84.35                          | 92.83                  |
|                   |                                       | k141-29364                        | 87.39                          | 92.51                  |
|                   |                                       | k141-6204                         | 86.29                          | 92.78                  |
|                   |                                       | k141-7467                         | 85.88                          | 93.48                  |
| CbOV1             | contig965                             | k141-17237                        | 96.41                          | 98.18                  |
|                   |                                       | k141-36573                        | 96.47                          | 98.59                  |
|                   |                                       | k141-50990                        | 96.7                           | 98.59                  |
|                   |                                       | k141-30077                        | 97.27                          | 98.7                   |
|                   |                                       | k141-57947                        | 97.36                          | 98.7                   |
| CbNV1             | k141-72534                            | k141-40198                        | 99.27                          | 100                    |
|                   |                                       | k141-3984                         | 99.28                          | 100                    |
|                   |                                       | k141-57522                        | 98.19                          | 100                    |
| -                 | k141-52449                            | k141-53721                        | 95.72                          | 99.7                   |
|                   |                                       | k141-44306                        | 95.82                          | 99.55                  |
|                   |                                       | k141-54540                        | 99.78                          | 99.7                   |
|                   |                                       | k141-68964                        | 94.17                          | 99.7                   |
| -                 | k141-27828                            | k141-41134                        | 100                            | 100                    |
|                   |                                       | k141-38712                        | 100                            | 100                    |
|                   |                                       | k141-3161                         | 100                            | 100                    |
| -                 | k141-21308                            | k141-31340                        | 95.02                          | 100                    |
| CbNSV3            | k141-3378                             | k141-39151                        | 97.69                          | 99.03                  |
|                   |                                       | k141-21666                        | 97.84                          | 98.16                  |
|                   |                                       | k141-40192                        | 97.06                          | 100                    |
|                   |                                       | k141-25946                        | 97.8                           | 99.31                  |
| CbOV2             | contig1024                            | k141-7251                         | 100                            | 100                    |
