# Supplementary material for: Characterization of the Mycovirome from the Plant-Pathogenic Fungus Cercospora beticola
Source: MDPI journal article supplement (doi:10.3390/v13101915), 2021-09-24
Supplement: s1 [file s1]

**Table S2. Primer pairs used to confirm the existence of viral sequences in *Cercospora beticola***

| Contig number | Putative name of viruses | Primer name | Primer sequence       | Primer length | Amplification size (bp) |
|---------------|--------------------------|-------------|-----------------------|---------------|-------------------------|
| contig1357    | CbHV1                    | 1357-F      | TGCTTGCTAGATTCGAAAGTC | 21            | 741                     |
|               |                          | 1357-R      | GGGTATCCTGAGTTGTTCCAC | 21            |                         |
| contig965     | CbOV1                    | 965-F       | CGAGAGAGAAGGCACAATCC  | 20            | 563                     |
|               |                          | 965-R       | TCCGACGAACAAAACCCACA  | 20            |                         |
| contig1024    | CbOV2                    | 1024-F      | TGAGTTGGTTCCTGGTCGTG  | 20            | 685                     |
|               |                          | 1024-R      | ATCCCTGGCGGTCTGAAAAG  | 20            |                         |
| k141_5161     | CbOV3                    | 5161-F      | CGGGAGGTATCGAACGTT    | 18            | 648                     |
|               |                          | 5161-R      | GAGAACCGAAACTGGGGGAG  | 20            |                         |
| k141_72534    | CbNV1                    | 72534-F     | CGAGACCGTTTCGCTGGA    | 18            | 765                     |
|               |                          | 72534-R     | ACAATACCCTGCAGTACCTT  | 20            |                         |
| contig154     | CbNSV1                   | 154-F       | CTAGAACAGTGC GCATCA   | 18            | 585                     |
|               |                          | 154-R       | CTGCCTGACCATCCCTTGA   | 19            |                         |
| k141_3378     | CbNSV3                   | 3378-F      | GATAGCCTCTCGGACATTGG  | 20            | 677                     |
|               |                          | 3378-R      | TTTTCTCTCGGGTGGCAGTC  | 20            |                         |
| k141_6617     | CbBYV1                   | 6617-F      | CCAAGATCTTTGAGCCTGA   | 20            | 679                     |
|               |                          | 6617-R      | TTGACTCGGTTTCGCAGTTGA | 20            |                         |
| k141_47347    | CbBYV1                   | 47347-F     | CCGACGTATGACATGACAGGA | 21            | 540                     |
|               |                          | 47347-R     | AACCCCAAGCACAGAAGC    | 18            |                         |
| k141_67601    | CbBYV1                   | 67601-F     | CCTCACTACGTCTACAAC    | 18            | 553                     |
|               |                          | 67601-R     | GTCGCCCCCTATGTGTCTACC | 20            |                         |
| k141_63059    | CbBYV2                   | 63059-F     | AGATGCGACAGAGGAGGACA  | 20            | 628                     |

|                                                                         |          |         |                        |    |     |
|-------------------------------------------------------------------------|----------|---------|------------------------|----|-----|
|                                                                         |          | 63059-R | ACCGGACCATTGACTGACC    | 20 |     |
| k141_13474                                                              | CbNSV5-B | 13474-F | TGGTAGTGTTCTGGGCTTTGG  | 21 | 513 |
|                                                                         |          | 13474-R | GGGCAGGTGGTGTTCGTAA    | 19 |     |
| k141_54286                                                              | -        | 54286-F | TCCGAGTCCTGATGCTTT     | 18 | 457 |
|                                                                         |          | 54286-R | TCCATTACGCCAGACAAACA   | 20 |     |
| k141_31340                                                              | -        | 31340-F | GTTGACTACCGACTGAAGCTAC | 22 | 649 |
|                                                                         |          | 31340-R | GAAGAGATGGCTAAAGAGATAG | 22 |     |
| Universal primers for Internal Transcribed Spacer (ITS) Region of fungi |          | ITS1    | CTTGGCATTAGAGGAAGTAA   | 21 | -   |
|                                                                         |          | ITS4    | TCCTCCGCTTATTGATATGC   | 20 |     |
