# Supplementary material for: Characterization of the Mycovirome from the Plant-Pathogenic Fungus Cercospora beticola
Source: MDPI journal article supplement (doi:10.3390/v13101915), 2021-09-24
Supplement: s1 [file s1]

**Table S6. Details of the 93 contigs obtained from 139 strains of *Cercospora beticola***

| Number | Name of putative virus          | Gene ID             | Length (bp) | Best matched protein                | Identity (%) | Sequence start | Sequence end | Genome type | Family/Genus       | E-value   |
|--------|---------------------------------|---------------------|-------------|-------------------------------------|--------------|----------------|--------------|-------------|--------------------|-----------|
| 1      | Cercospora beticola hypovirus 1 | Cb_clean_Contig1357 | 12624       | polyprotein [Wuhan insect virus 14] | 52.9         | 1518           | 3818         | (+)ssRNA    | <i>Hypoviridae</i> | 0.00E+00  |
| 2      |                                 | Cb_clean_Contig3558 | 12361       |                                     | 54.8         | 1519           | 3644         | (+)ssRNA    |                    | 0.00E+00  |
| 3      |                                 | Cb_clean_Contig4473 | 10768       |                                     | 58.3         | 1901           | 3530         | (+)ssRNA    |                    | 0.00E+00  |
| 4      |                                 | Cb_clean_Contig340  | 9796        |                                     | 50.2         | 1564           | 2698         | (+)ssRNA    |                    | 0.00E+00  |
| 5      |                                 | Cb_clean_Contig2265 | 9611        |                                     | 53.8         | 1518           | 3359         | (+)ssRNA    |                    | 0.00E+00  |
| 6      |                                 | Cb_clean_Contig2550 | 4313        |                                     | 45.8         | 1564           | 2321         | (+)ssRNA    |                    | 0.00E+00  |
| 7      |                                 | Cb_clean_Contig1993 | 1180        |                                     | 59.2         | 3299           | 3591         | (+)ssRNA    |                    | 1.00E-103 |
| 8      |                                 | Cb_clean_Contig2381 | 1146        |                                     | 49.4         | 3490           | 3818         | (+)ssRNA    |                    | 9.00E-100 |
| 9      |                                 | Cb_clean_Contig3466 | 1112        |                                     | 49.5         | 760            | 899          | (+)ssRNA    |                    | 1.00E-09  |
| 10     |                                 | Cb_clean_Contig1397 | 807         |                                     | 28.2         | 3666           | 3799         | (+)ssRNA    |                    | 1.00E-10  |
| 11     |                                 | Cb_clean_Contig2817 | 579         |                                     | 44.6         | 1162           | 1269         | (+)ssRNA    |                    | 6.00E-16  |
| 12     |                                 | Cb_clean_Contig1712 | 159         |                                     | 58.5         | 3994           | 4042         | (+)ssRNA    |                    | 1.00E-07  |
| 13     |                                 | Cb_clean_k141_56835 | 12570       |                                     | 55.8         | 1519           | 3605         | (+)ssRNA    |                    | 0.00E+00  |
| 14     |                                 | Cb_clean_k141_35317 | 12185       |                                     | 54.0         | 1518           | 3818         | (+)ssRNA    |                    | 0.00E+00  |
| 15     |                                 | Cb_clean_k141_31123 | 11701       |                                     | 55.1         | 1519           | 3631         | (+)ssRNA    |                    | 0.00E+00  |
| 16     |                                 | Cb_clean_k141_9569  | 7609        |                                     | 39.4         | 1519           | 2003         | (+)ssRNA    |                    | 8.00E-101 |
| 17     |                                 | Cb_clean_k141_6204  | 5405        |                                     | 37.5         | 334            | 1269         | (+)ssRNA    |                    | 1.00E-83  |
| 18     |                                 | Cb_clean_k141_5852  | 3885        |                                     | 57.4         | 2655           | 3818         | (+)ssRNA    |                    | 0.00E+00  |
| 19     |                                 | Cb_clean_k141_29364 | 2513        |                                     | 43.6         | 1519           | 1897         | (+)ssRNA    |                    | 2.00E-86  |
| 20     |                                 | Cb_clean_k141_7467  | 1996        |                                     | 38.22        | 2230           | 2919         | (+)ssRNA    |                    | 2.60E-10  |
| 21     |                                 | Cb_clean_k141_14799 | 1914        |                                     | 62.7         | 2814           | 3451         | (+)ssRNA    |                    | 0.00E+00  |
| 22     |                                 | Cb_clean_k141_13420 | 1861        |                                     | 46.7         | 1564           | 2003         | (+)ssRNA    |                    | 8.00E-113 |
| 23     |                                 | Cb_clean_k141_48216 | 1569        |                                     | 48.4         | 3545           | 3818         | (+)ssRNA    |                    | 2.00E-77  |
| 24     |                                 | Cb_clean_k141_49715 | 1457        |                                     | 50           | 3153           | 3244         | (+)ssRNA    |                    | 9.00E-17  |
| 25     |                                 | Cb_clean_k141_63002 | 914         |                                     | 61.7         | 3347           | 3637         | (+)ssRNA    |                    | 2.00E-111 |
| 26     |                                 | Cb_clean_k141_20910 | 695         |                                     | 66.7         | 3421           | 3465         | (+)ssRNA    |                    | 2.00E-16  |
| 27     |                                 | Cb_clean_k141_49228 | 575         |                                     | 70.2         | 2318           | 2505         | (+)ssRNA    |                    | 9.00E-87  |
| 28     |                                 | Cb_clean_k141_45450 | 573         |                                     | 40.4         | 3035           | 3072         | (+)ssRNA    |                    | 4.00E-11  |

|    |                                         |                     |      |                                                                                           |      |      |      |          |                         |           |
|----|-----------------------------------------|---------------------|------|-------------------------------------------------------------------------------------------|------|------|------|----------|-------------------------|-----------|
| 29 |                                         | Cb_clean_k141_41826 | 552  |                                                                                           | 39.3 | 3630 | 3684 | (+)ssRNA |                         | 3.00E-07  |
| 30 |                                         | Cb_clean_k141_35224 | 510  |                                                                                           | 65   | 3605 | 3644 | (+)ssRNA |                         | 4.00E-08  |
| 31 |                                         | Cb_clean_k141_55778 | 425  |                                                                                           | 73.6 | 3545 | 3595 | (+)ssRNA |                         | 6.00E-15  |
| 32 |                                         | Cb_clean_k141_1313  | 415  |                                                                                           | 60.2 | 3372 | 3464 | (+)ssRNA |                         | 3.00E-29  |
| 33 |                                         | Cb_clean_k141_13671 | 359  |                                                                                           | 44.9 | 3022 | 3053 | (+)ssRNA |                         | 6.00E-07  |
| 34 | -                                       | Cb_clean_k141_17023 | 382  | RNA dependent RNA polymerase [Plasmopara viticola lesion associated ourmia-like virus 22] | 62   | 70   | 119  | (+)ssRNA | <i>Botourmiaviridae</i> | 3.00E-09  |
| 35 | Cercospora beticola ourmia-like virus 2 | Cb_clean_Contig1024 | 1440 | RNA dependent RNA polymerase [Plasmopara viticola lesion associated ourmia-like virus 42] | 78.6 | 202  | 615  | (+)ssRNA |                         | 0.00E+00  |
| 36 |                                         | Cb_clean_k141_7251  | 1440 |                                                                                           | 81.2 | 202  | 615  | (+)ssRNA |                         | 0.00E+00  |
| 37 | Cercospora beticola ourmia-like virus 1 | Cb_clean_Contig965  | 2273 | RNA dependent RNA polymerase [Erysiphe necator associated ourmia-like virus 10]           | 66.8 | 23   | 600  | (+)ssRNA |                         | 0.00E+00  |
| 38 |                                         | Cb_clean_k141_30077 | 2276 |                                                                                           | 67.9 | 23   | 600  | (+)ssRNA |                         | 0.00E+00  |
| 39 |                                         | Cb_clean_k141_57947 | 2237 |                                                                                           | 67.9 | 23   | 600  | (+)ssRNA |                         | 0.00E+00  |
| 40 |                                         | Cb_clean_k141_50990 | 1424 |                                                                                           | 71.7 | 266  | 600  | (+)ssRNA |                         | 1.00E-160 |
| 41 |                                         | Cb_clean_k141_36573 | 1359 |                                                                                           | 72.4 | 287  | 600  | (+)ssRNA |                         | 1.00E-151 |
| 42 |                                         | Cb_clean_k141_17237 | 1199 |                                                                                           | 73.1 | 333  | 600  | (+)ssRNA |                         | 3.00E-131 |
| 43 |                                         | Cb_clean_k141_57307 | 542  |                                                                                           | 67.9 | 76   | 248  | (+)ssRNA |                         | 5.00E-58  |
| 44 |                                         | Cb_clean_k141_51878 | 362  |                                                                                           | 68.1 | 224  | 341  | (+)ssRNA |                         | 1.00E-41  |
| 45 |                                         | Cb_clean_k141_18635 | 338  |                                                                                           | 66.5 | 157  | 268  | (+)ssRNA |                         | 2.00E-38  |
| 46 | Cercospora beticola ourmia-like virus 3 | Cb_clean_k141_5161  | 2108 | RNA dependent RNA polymerase [Soybean thrips ourmia-like virus 1]                         | 81.1 | 43   | 625  | (+)ssRNA |                         | 0.00E+00  |
| 47 | Cercospora beticola narnavirus 1        | Cb_clean_k141_40198 | 4127 | RNA dependent RNA polymerase [Erysiphe necator associated narnavirus 13]                  | 49.7 | 1    | 810  | (+)ssRNA | <i>Narnaviridae</i>     | 0.00E+00  |
| 48 |                                         | Cb_clean_k141_3984  | 2527 |                                                                                           | 49.7 | 1    | 810  | (+)ssRNA |                         | 0.00E+00  |
| 49 |                                         | Cb_clean_k141_72534 | 2487 |                                                                                           | 75.2 | 1    | 810  | (+)ssRNA |                         | 0.00E+00  |
| 50 |                                         | Cb_clean_k141_57522 | 2324 |                                                                                           | 49   | 46   | 810  | (+)ssRNA |                         | 0.00E+00  |
| 51 | -                                       | Cb_clean_k141_15570 | 3450 | hypothetical protein [Botrytis cinerea binarnavirus 2]                                    | 45.7 | 25   | 720  | dsRNA    | <i>Birnaviridae</i>     | 0.00E+00  |

|    |                                                                        |                     |      |                                                  |       |      |      |          |             |           |
|----|------------------------------------------------------------------------|---------------------|------|--------------------------------------------------|-------|------|------|----------|-------------|-----------|
| 52 | Cercospora beticola metavirus 1                                        | Cb_clean_k141_3161  | 1783 | putative gag homologue                           | 28.5  | 176  | 639  | ssRNA-RT | Metaviridae | 1.00E-35  |
| 53 |                                                                        | Cb_clean_k141_38712 | 1830 | [Cladosporium fulvum T-1 virus]                  | 28.5  | 176  | 639  | ssRNA-RT |             | 2.00E-35  |
| 54 |                                                                        | Cb_clean_k141_27828 | 1964 |                                                  | 28.5  | 176  | 639  | ssRNA-RT |             | 3.00E-35  |
| 55 |                                                                        | Cb_clean_k141_41134 | 1234 |                                                  | 28.2  | 176  | 639  | ssRNA-RT |             | 2.00E-34  |
| 56 |                                                                        | Cb_clean_k141_21308 | 1671 | env homologue                                    | 62.2  | 31   | 104  | ssRNA-RT |             | 2.00E-16  |
| 57 |                                                                        | Cb_clean_k141_31340 | 1247 | [Cladosporium fulvum T-1 virus]                  | 64.3  | 21   | 104  | ssRNA-RT |             | 6.00E-21  |
| 58 |                                                                        | Cb_clean_k141_45057 | 437  |                                                  | 31.8  | 39   | 164  | ssRNA-RT |             | 2.00E-06  |
| 59 | -                                                                      | Cb_clean_k141_54286 | 566  | NS1 [Penicillium discovirus]                     | 49.2  | 212  | 337  | (-)ssRNA | -           | 1.00E-35  |
| 60 |                                                                        | Cb_clean_k141_12535 | 386  | NC [Penicillium discovirus]                      | 61.9  | 66   | 191  | (-)ssRNA |             | 5.00E-48  |
| 61 |                                                                        | Cb_clean_k141_33118 | 332  |                                                  | 68.3  | 203  | 262  | (-)ssRNA |             | 3.00E-17  |
| 62 | Cercospora beticola associated mycobunyavirales-like virus 1 segment L | Cb_clean_k141_6617  | 4197 | RNA dependent RNA                                | 69.4  | 1    | 366  | (-)ssRNA |             | 6.00E-173 |
| 63 |                                                                        | Cb_clean_k141_67281 | 2314 | polymerase [Plasmopara                           | 46.7  | 362  | 1106 | (-)ssRNA |             | 0.00E+00  |
| 64 |                                                                        | Cb_clean_k141_23000 | 405  | viticola lesion associated                       | 55.2  | 734  | 858  | (-)ssRNA |             | 2.00E-38  |
| 65 |                                                                        | Cb_clean_k141_13335 | 320  | mycobunyavirales-like virus 4]                   | 77.27 | 1    | 43   | (-)ssRNA |             | 2.00E-13  |
| 66 | Cercospora beticola associated mycobunyavirales-like virus 1 segment S | Cb_clean_k141_13474 | 1134 | NP [Plasmopara viticola                          | 56.6  | 1    | 281  | (-)ssRNA |             | 2.00E-108 |
| 67 |                                                                        | Cb_clean_k141_47347 | 855  | lesion associated                                | 62.5  | 28   | 285  | (-)ssRNA |             | 1.00E-113 |
| 68 |                                                                        | Cb_clean_k141_14865 | 488  | mycobunyavirales-like virus 4]                   | 67.6  | 148  | 285  | (-)ssRNA |             | 2.00E-63  |
| 69 |                                                                        | Cb_clean_k141_25120 | 615  |                                                  | 61.6  | 1    | 133  | (-)ssRNA |             | 5.00E-44  |
| 70 |                                                                        | Cb_clean_k141_67601 | 1854 | NS [Plasmopara viticola                          | 44.2  | 8    | 468  | (-)ssRNA |             | 2.00E-125 |
| 71 |                                                                        | Cb_clean_k141_12481 | 346  | lesion associated mycobunyavirales-like virus 4] | 53.5  | 368  | 481  | (-)ssRNA |             | 2.00E-37  |
| 72 | Cercospora beticola negative-stranded virus 3                          | Cb_clean_k141_3378  | 6191 | RNA dependent RNA                                | 61.2  | 1    | 1954 | (-)ssRNA |             | 0.00E+00  |
| 73 |                                                                        | Cb_clean_k141_25946 | 3186 | polymerase [Plasmopara                           | 65    | 1    | 1011 | (-)ssRNA |             | 0.00E+00  |
| 74 |                                                                        | Cb_clean_k141_39151 | 2992 | viticola lesion associated                       | 51    | 1011 | 1954 | (-)ssRNA |             | 0.00E+00  |
| 75 |                                                                        | Cb_clean_k141_21666 | 1389 | mononegaambi virus 5]                            | 46.2  | 1336 | 1797 | (-)ssRNA |             | 2.00E-138 |
| 76 |                                                                        | Cb_clean_k141_40192 | 1259 |                                                  | 64.9  | 890  | 1308 | (-)ssRNA |             | 2.00E-174 |
| 77 |                                                                        | Cb_clean_k141_39090 | 1035 |                                                  | 57.7  | 1597 | 1941 | (-)ssRNA |             | 2.00E-117 |
| 78 |                                                                        | Cb_clean_k141_54717 | 673  |                                                  | 37.7  | 1507 | 1726 | (-)ssRNA |             | 5.00E-47  |
| 79 |                                                                        | Cb_clean_k141_2670  | 672  |                                                  | 58.2  | 1275 | 1467 | (-)ssRNA |             | 1.00E-73  |

|    |                                                              |                     |      |                                                                                                     |       |      |      |          |  |          |
|----|--------------------------------------------------------------|---------------------|------|-----------------------------------------------------------------------------------------------------|-------|------|------|----------|--|----------|
| 80 |                                                              | Cb_clean_k141_57732 | 533  |                                                                                                     | 58.1  | 1360 | 1536 | (-)ssRNA |  | 5.00E-62 |
| 81 |                                                              | Cb_clean_k141_5086  | 424  |                                                                                                     | 59.7  | 952  | 1072 | (-)ssRNA |  | 5.00E-43 |
| 82 |                                                              | Cb_clean_k141_32680 | 422  |                                                                                                     | 59.7  | 952  | 1072 | (-)ssRNA |  | 5.00E-43 |
| 83 |                                                              | Cb_clean_k141_64068 | 417  |                                                                                                     | 72.2  | 685  | 821  | (-)ssRNA |  | 3.00E-77 |
| 84 |                                                              | Cb_clean_k141_40049 | 408  |                                                                                                     | 80.6  | 482  | 617  | (-)ssRNA |  | 4.00E-72 |
| 85 |                                                              | Cb_clean_k141_44574 | 382  |                                                                                                     | 62    | 848  | 974  | (-)ssRNA |  | 2.00E-55 |
| 86 |                                                              | Cb_clean_k141_11227 | 350  |                                                                                                     | 53.3  | 1    | 101  | (-)ssRNA |  | 1.00E-23 |
| 87 |                                                              | Cb_clean_k141_36621 | 314  |                                                                                                     | 74.84 | 486  | 589  | (-)ssRNA |  | 2.00E-48 |
| 88 |                                                              | Cb_clean_k141_33467 | 308  |                                                                                                     | 69.3  | 291  | 391  | (-)ssRNA |  | 3.00E-40 |
| 89 | Cercospora beticola negative-stranded virus 1                | Cb_clean_Contig154  | 6604 | RNA dependent RNA polymerase [Aspergillus fumigatus negative-stranded RNA virus 1]                  | 57.3  | 3    | 2122 | (-)ssRNA |  | 0.00E+00 |
| 90 | Cercospora beticola associated mycobunyavirales-like virus 2 | Cb_clean_k141_63059 | 6457 | RNA dependent RNA polymerase [Plasmopara viticola lesion associated mycobunyavirales-like virus 10] | 63.6  | 1    | 1827 | (-)ssRNA |  | 0.00E+00 |
| 91 |                                                              | Cb_clean_k141_26880 | 499  |                                                                                                     | 53.4  | 266  | 430  | (-)ssRNA |  | 4.00E-46 |
| 92 |                                                              | Cb_clean_k141_15719 | 440  |                                                                                                     | 80.8  | 786  | 931  | (-)ssRNA |  | 1.00E-70 |
| 93 |                                                              | Cb_clean_k141_61155 | 310  |                                                                                                     | 85.3  | 1045 | 1146 | (-)ssRNA |  | 1.00E-52 |
