# Supplementary material for: Characterization of the Mycovirome from the Plant-Pathogenic Fungus Cercospora beticola
Source: MDPI journal article supplement (doi:10.3390/v13101915), 2021-09-24
Supplement: s1 [file s1]

**Table S1. *Cercospora beticola* isolates from China used in this study**

| Sample | Code        | Host               | Date | Location     | Description                                                                                                                       |
|--------|-------------|--------------------|------|--------------|-----------------------------------------------------------------------------------------------------------------------------------|
| 1      | 66-ABT      | <i>B. vulgaris</i> | 2019 | Inner        | Isolates with normal phenotype collected from Inner Mongolia Autonomous Region in 2019 (Supplementary Materials Figure S1 Type I) |
|        | 65-ABT      | <i>B. vulgaris</i> | 2019 | Mongolia     |                                                                                                                                   |
|        | 67-ABT      | <i>B. vulgaris</i> | 2019 | Autonomous   |                                                                                                                                   |
|        | YBS-7       | <i>B. vulgaris</i> | 2019 | Region       |                                                                                                                                   |
|        | YBS-5       | <i>B. vulgaris</i> | 2019 |              |                                                                                                                                   |
|        | 61-SDY22    | <i>B. vulgaris</i> | 2019 |              |                                                                                                                                   |
|        | 43-H809     | <i>B. vulgaris</i> | 2019 |              |                                                                                                                                   |
|        | 40-H809     | <i>B. vulgaris</i> | 2019 |              |                                                                                                                                   |
|        | 55-H004     | <i>B. vulgaris</i> | 2019 |              |                                                                                                                                   |
| 2      | CF0901-7    | <i>B. vulgaris</i> | 2020 | Inner        | Colonies with normal phenotype. (Supplementary Materials Figure S1 Type II)                                                       |
|        | CF0901-6    | <i>B. vulgaris</i> | 2020 | Mongolia     |                                                                                                                                   |
|        | CF0901-35   | <i>B. vulgaris</i> | 2020 | Autonomous   |                                                                                                                                   |
|        | CF0901-38   | <i>B. vulgaris</i> | 2020 | Region       |                                                                                                                                   |
|        | CF0901-61   | <i>B. vulgaris</i> | 2020 |              |                                                                                                                                   |
|        | CF0901-57   | <i>B. vulgaris</i> | 2020 |              |                                                                                                                                   |
|        | CF0901-49   | <i>B. vulgaris</i> | 2020 |              |                                                                                                                                   |
|        | CF0901-51   | <i>B. vulgaris</i> | 2020 |              |                                                                                                                                   |
|        | CF0901-52   | <i>B. vulgaris</i> | 2020 |              |                                                                                                                                   |
|        | XAM0819-1   | <i>B. vulgaris</i> | 2020 |              |                                                                                                                                   |
|        | WLCB0811-19 | <i>B. vulgaris</i> | 2020 |              |                                                                                                                                   |
|        | WLCB0807-1  | <i>B. vulgaris</i> | 2020 |              |                                                                                                                                   |
|        | WLCB0807-13 | <i>B. vulgaris</i> | 2020 |              |                                                                                                                                   |
|        | YA0807-18   | <i>B. vulgaris</i> | 2020 | Heilongjiang |                                                                                                                                   |
|        | YA0807-16   | <i>B. vulgaris</i> | 2020 | Province     |                                                                                                                                   |
|        | HEB-14      | <i>B. vulgaris</i> | 2020 |              |                                                                                                                                   |
|        | HEB-39      | <i>B. vulgaris</i> | 2020 |              |                                                                                                                                   |
|        | HEB-22      | <i>B. vulgaris</i> | 2020 |              |                                                                                                                                   |
|        | YL1002-100  | <i>B. vulgaris</i> | 2020 | Xinjiang     |                                                                                                                                   |
|        | YL1002-15   | <i>B. vulgaris</i> | 2020 | Uygur        |                                                                                                                                   |
|        | YL1002-143  | <i>B. vulgaris</i> | 2020 | Autonomous   |                                                                                                                                   |
|        | YL1002-191  | <i>B. vulgaris</i> | 2020 | Region of    |                                                                                                                                   |
|        | XJYL-28     | <i>B. vulgaris</i> | 2020 | China        |                                                                                                                                   |
| 3      | JN-38       | <i>B. vulgaris</i> | 2020 | Inner        | The edge of colonies is fanned out. (Supplementary Materials Figure S1 Type III)                                                  |
|        | CF0901-31   | <i>B. vulgaris</i> | 2020 | Mongolia     |                                                                                                                                   |
|        | CF1019SY-69 | <i>B. vulgaris</i> | 2020 | Autonomous   |                                                                                                                                   |
|        | CF1017SY-75 | <i>B. vulgaris</i> | 2020 | Region       |                                                                                                                                   |
|        | CF1016SC-85 | <i>B. vulgaris</i> | 2020 |              |                                                                                                                                   |
|        | CF1017SC-84 | <i>B. vulgaris</i> | 2020 |              |                                                                                                                                   |
|        | CF1008-44   | <i>B. vulgaris</i> | 2020 |              |                                                                                                                                   |

|                    |             |                    |                    |                                                       |                                                                                            |
|--------------------|-------------|--------------------|--------------------|-------------------------------------------------------|--------------------------------------------------------------------------------------------|
|                    | WLCB0811-18 | <i>B. vulgaris</i> | 2020               | Xinjiang<br>Uygur<br>Autonomous<br>Region of<br>China |                                                                                            |
|                    | WLCB0811-5  | <i>B. vulgaris</i> | 2020               |                                                       |                                                                                            |
|                    | YL1002-39   | <i>B. vulgaris</i> | 2020               |                                                       |                                                                                            |
|                    | YL1002-141  | <i>B. vulgaris</i> | 2020               |                                                       |                                                                                            |
|                    | YL1002-105  | <i>B. vulgaris</i> | 2020               |                                                       |                                                                                            |
|                    | YL1002-62   | <i>B. vulgaris</i> | 2020               |                                                       |                                                                                            |
|                    | XJYL-38     | <i>B. vulgaris</i> | 2020               |                                                       |                                                                                            |
|                    | YL1002-172  | <i>B. vulgaris</i> | 2020               |                                                       |                                                                                            |
|                    | YL1002-38   | <i>B. vulgaris</i> | 2020               |                                                       |                                                                                            |
|                    | YL1002-159  | <i>B. vulgaris</i> | 2020               |                                                       |                                                                                            |
|                    | YL1002-187  | <i>B. vulgaris</i> | 2020               |                                                       |                                                                                            |
|                    | HEB-12      | <i>B. vulgaris</i> | 2020               | Heilongjiang<br>Province                              |                                                                                            |
|                    | HEB-52      | <i>B. vulgaris</i> | 2020               |                                                       |                                                                                            |
| 4                  | YL1002-77   | <i>B. vulgaris</i> | 2020               | Xinjiang<br>Uygur<br>Autonomous<br>Region of<br>China | pigmentation (red) at the edge of colonies.<br>(Supplementary Materials Figure S1 Type IV) |
|                    | XJYL-41     | <i>B. vulgaris</i> | 2020               |                                                       |                                                                                            |
|                    | SZDB-21     | <i>B. vulgaris</i> | 2020               | Beijing                                               |                                                                                            |
|                    | SZDB-3      | <i>B. vulgaris</i> | 2020               |                                                       |                                                                                            |
|                    | SZDB-13     | <i>B. vulgaris</i> | 2020               |                                                       |                                                                                            |
|                    | SZDB-10     | <i>B. vulgaris</i> | 2020               |                                                       |                                                                                            |
|                    | SZDB-24     | <i>B. vulgaris</i> | 2020               |                                                       |                                                                                            |
|                    | SZDB-1      | <i>B. vulgaris</i> | 2020               |                                                       |                                                                                            |
|                    | SZDB-29     | <i>B. vulgaris</i> | 2020               |                                                       |                                                                                            |
|                    | SZDB-26     | <i>B. vulgaris</i> | 2020               |                                                       |                                                                                            |
|                    | SZDB-19     | <i>B. vulgaris</i> | 2020               |                                                       |                                                                                            |
|                    | SZDB-7      | <i>B. vulgaris</i> | 2020               |                                                       |                                                                                            |
|                    | SZDB-18     | <i>B. vulgaris</i> | 2020               |                                                       |                                                                                            |
|                    | SZDB-6      | <i>B. vulgaris</i> | 2020               |                                                       |                                                                                            |
|                    | SZDB-17     | <i>B. vulgaris</i> | 2020               |                                                       |                                                                                            |
|                    | CF1018SY-74 | <i>B. vulgaris</i> | 2020               | Inner<br>Mongolia<br>Autonomous<br>Region             |                                                                                            |
|                    | CF1019SY-99 | <i>B. vulgaris</i> | 2020               |                                                       |                                                                                            |
|                    | CF1020SY-98 | <i>B. vulgaris</i> | 2020               |                                                       |                                                                                            |
|                    | CF1022SY-32 | <i>B. vulgaris</i> | 2020               |                                                       |                                                                                            |
|                    | 5           | CFNKY1006-BM2.5-15 | <i>B. vulgaris</i> | 2020                                                  |                                                                                            |
| CFNKY1006-BM2.5-30 |             | <i>B. vulgaris</i> | 2020               |                                                       |                                                                                            |
| CFNKY1006-BM2.5-31 |             | <i>B. vulgaris</i> | 2020               |                                                       |                                                                                            |
| CFNKY1006-BM2.5-17 |             | <i>B. vulgaris</i> | 2020               |                                                       |                                                                                            |
| CFNKY1006-BM2.5-56 |             | <i>B. vulgaris</i> | 2020               |                                                       |                                                                                            |
| CFNKY1006-BM2.5-57 |             | <i>B. vulgaris</i> | 2020               |                                                       |                                                                                            |
| CFNKY1006-BM2.5-58 |             | <i>B. vulgaris</i> | 2020               |                                                       |                                                                                            |
| CFNKY1006-BM2.5-59 |             | <i>B. vulgaris</i> | 2020               |                                                       |                                                                                            |

|   |                    |                    |      |                                           |                                                                                  |                                                                                      |
|---|--------------------|--------------------|------|-------------------------------------------|----------------------------------------------------------------------------------|--------------------------------------------------------------------------------------|
|   | CFNKY1006-BM2.5-60 | <i>B. vulgaris</i> | 2020 |                                           |                                                                                  |                                                                                      |
|   | CFNKY1006-BM2.5-6  | <i>B. vulgaris</i> | 2020 |                                           |                                                                                  |                                                                                      |
|   | CFNKY1006-BM2.5-4  | <i>B. vulgaris</i> | 2020 |                                           |                                                                                  |                                                                                      |
|   | CFNKY1006-BM2.5-16 | <i>B. vulgaris</i> | 2020 |                                           |                                                                                  |                                                                                      |
|   | CFNKY1006-BM2.5-18 | <i>B. vulgaris</i> | 2020 |                                           |                                                                                  |                                                                                      |
|   | CFNKY1006-BM2.5-24 | <i>B. vulgaris</i> | 2020 |                                           |                                                                                  |                                                                                      |
|   | CFNKY1006-BM2.5-25 | <i>B. vulgaris</i> | 2020 |                                           |                                                                                  |                                                                                      |
|   | CFNKY1006-BM2.5-26 | <i>B. vulgaris</i> | 2020 |                                           |                                                                                  |                                                                                      |
|   | CFNKY1006-BM2.5-43 | <i>B. vulgaris</i> | 2020 |                                           |                                                                                  |                                                                                      |
|   | CFNKY-BM-36        | <i>B. vulgaris</i> | 2020 |                                           |                                                                                  |                                                                                      |
|   | CFNKY-BM-8         | <i>B. vulgaris</i> | 2020 |                                           |                                                                                  |                                                                                      |
|   | CFNKY-BM-35        | <i>B. vulgaris</i> | 2020 |                                           |                                                                                  |                                                                                      |
|   | XJHC0925-BM2-11    | <i>B. vulgaris</i> | 2020 |                                           |                                                                                  |                                                                                      |
|   | XJHC0925-BM2-13    | <i>B. vulgaris</i> | 2020 | Xinjiang                                  |                                                                                  |                                                                                      |
|   | XJHC0925-BM2-20    | <i>B. vulgaris</i> | 2020 | Uygur                                     |                                                                                  |                                                                                      |
|   | XJHC-BM2-18        | <i>B. vulgaris</i> | 2020 | Autonomous<br>Region of<br>China          |                                                                                  |                                                                                      |
| 6 | CF0901BZ-38        | <i>B. vulgaris</i> | 2020 | Inner<br>Mongolia<br>Autonomous<br>Region |                                                                                  | Pyraclostrobin-resistant isolates.<br>(Supplementary Materials Figure<br>S1 Type VI) |
|   | CF0901BZ-25        | <i>B. vulgaris</i> | 2020 |                                           |                                                                                  |                                                                                      |
|   | CF0901BZ-23        | <i>B. vulgaris</i> | 2020 |                                           |                                                                                  |                                                                                      |
|   | CF2-4              | <i>B. vulgaris</i> | 2020 |                                           |                                                                                  |                                                                                      |
|   | CFNKY-BZ2-4        | <i>B. vulgaris</i> | 2020 |                                           |                                                                                  |                                                                                      |
|   | CFNKY-BZ2-23       | <i>B. vulgaris</i> | 2020 |                                           |                                                                                  |                                                                                      |
|   | CFNKY-BZ2-22       | <i>B. vulgaris</i> | 2020 |                                           |                                                                                  |                                                                                      |
|   | CFNKY-BZ2-17       | <i>B. vulgaris</i> | 2020 |                                           |                                                                                  |                                                                                      |
|   | CFNKY-BZ2-20       | <i>B. vulgaris</i> | 2020 |                                           |                                                                                  |                                                                                      |
|   | CFNKY-BZ2-21       | <i>B. vulgaris</i> | 2020 |                                           |                                                                                  |                                                                                      |
|   | CFNKY-BZ2-8        | <i>B. vulgaris</i> | 2020 |                                           |                                                                                  |                                                                                      |
|   | CFNKY-BZ2-14       | <i>B. vulgaris</i> | 2020 |                                           |                                                                                  |                                                                                      |
|   | CFNKY-BZ2-13       | <i>B. vulgaris</i> | 2020 |                                           |                                                                                  |                                                                                      |
|   | CFBZ2-2            | <i>B. vulgaris</i> | 2020 |                                           |                                                                                  |                                                                                      |
|   | CFBZ2-14           | <i>B. vulgaris</i> | 2020 |                                           |                                                                                  |                                                                                      |
|   | CFBZ2-9            | <i>B. vulgaris</i> | 2020 |                                           |                                                                                  |                                                                                      |
|   | CFBZ2-1            | <i>B. vulgaris</i> | 2020 |                                           |                                                                                  |                                                                                      |
| 7 | YA0807-19          | <i>B. vulgaris</i> | 2020 | Heilongjiang<br>Province                  | Colonies with irregular edge.<br>(Supplementary Materials Figure<br>S1 Type VII) |                                                                                      |
|   | CF1016SY-62        | <i>B. vulgaris</i> | 2020 | Inner<br>Mongolia<br>Autonomous<br>Region |                                                                                  |                                                                                      |
|   | CF1016SY-66        | <i>B. vulgaris</i> | 2020 |                                           |                                                                                  |                                                                                      |
|   | CF1016SY-71        | <i>B. vulgaris</i> | 2020 |                                           |                                                                                  |                                                                                      |
|   | CF1016SY-48        | <i>B. vulgaris</i> | 2020 |                                           |                                                                                  |                                                                                      |
|   | CF1017SY-91        | <i>B. vulgaris</i> | 2020 |                                           |                                                                                  |                                                                                      |
|   | CF1019SY-78        | <i>B. vulgaris</i> | 2020 |                                           |                                                                                  |                                                                                      |
|   | XJYL-34            | <i>B. vulgaris</i> | 2020 | Xinjiang                                  |                                                                                  |                                                                                      |

|   |             |                    |      |                                  |                                                                                   |
|---|-------------|--------------------|------|----------------------------------|-----------------------------------------------------------------------------------|
|   | XJYL-12     | <i>B. vulgaris</i> | 2020 | Uygur                            |                                                                                   |
|   | XJYL-49     | <i>B. vulgaris</i> | 2020 | Autonomous                       |                                                                                   |
|   | XJYL-15     | <i>B. vulgaris</i> | 2020 | Region of                        |                                                                                   |
|   | XJYL-47     | <i>B. vulgaris</i> | 2020 | China                            |                                                                                   |
|   | XJYL-11     | <i>B. vulgaris</i> | 2020 |                                  |                                                                                   |
|   | XJYL-44     | <i>B. vulgaris</i> | 2020 |                                  |                                                                                   |
|   | XJHC-32     | <i>B. vulgaris</i> | 2020 |                                  |                                                                                   |
| 8 | YL1002-22   | <i>B. vulgaris</i> | 2020 | Xinjiang                         | Colonies with irregular edge.<br>(Supplementary Materials Figure<br>S1 Type VIII) |
|   | YL1002-13   | <i>B. vulgaris</i> | 2020 | Uygur                            |                                                                                   |
|   | YL1002-90   | <i>B. vulgaris</i> | 2020 | Autonomous<br>Region of<br>China |                                                                                   |
|   | CF1016SC-51 | <i>B. vulgaris</i> | 2020 | Inner                            |                                                                                   |
|   | CF1016SY-4  | <i>B. vulgaris</i> | 2020 | Mongolia                         |                                                                                   |
|   | CF1016SY-3  | <i>B. vulgaris</i> | 2020 | Autonomous                       |                                                                                   |
|   | CF1016SY-46 | <i>B. vulgaris</i> | 2020 | Region                           |                                                                                   |
|   | CF1016SY-13 | <i>B. vulgaris</i> | 2020 |                                  |                                                                                   |
|   | CF1016SY-35 | <i>B. vulgaris</i> | 2020 |                                  |                                                                                   |
|   | CF1016SY-47 | <i>B. vulgaris</i> | 2020 |                                  |                                                                                   |
|   | CF1016SY-24 | <i>B. vulgaris</i> | 2020 |                                  |                                                                                   |
|   | TCZF-1008   | <i>B. vulgaris</i> | 2020 |                                  |                                                                                   |
