# Supplementary material for: Characterization of the Mycovirome from the Plant-Pathogenic Fungus Cercospora beticola
Source: MDPI journal article supplement (doi:10.3390/v13101915), 2021-09-24
Supplement: s1 [file s1]

**Table S4 The sequences of 99 primary contigs assembled from clean data of 139 strains of *Cercospora beticola***

```
>Cb_clean_k141_7467
CGCGGCATTAGCCGCTGCGTCTGTGGTGCTCTTACACAGGCCCTCAGGGGACATATATAAGAGATGATTGCTCCACGCTTTCAGTGGATTCCATTTG
TCAAAGGTGGTTTTTCCTTTGTCTGGAAGCAGATAATTTCTGCAATCGGATCCTTGCGGATCGCGGCACGTGCCATGCCGAGGCCTCTGTGAGGCCGT
TGCCCTTCCCGGGCGTTGTCAATTGTGACGAGGTGCGGAGCACCGAGCTATCGCGTCTACGAGTCCGGAATGACTGTAACTATTGCAACAGGGCG
GTGTCACACCCAAATGTGTATAAACTTGCGCGTTTCGGAGCGTTCTCAAACGCTGACCTACACTGGGTAAACGGATGGTTATCAGAACGGCGATGAG
GTAAGTGTGGACTAGTGACCCTAGAAGTTATCCACCTCATTGTGAACCATCTTCCCTTTAAGATTTAGAAATGAGCACCGCTCTAAACGGTTAACACC
ATTTTGTTCGCGCTTCCCTCTGGACGGGACGATTCAAATGTCTTCTATCAATTTTCTTCGTTTGGATCAACGCAAAGATCCCGGGAGGCTCCGAGT
GCCCAAAGAACGGTCTGCTATCCGTTTCATCCTATTCAAGTTCAGCCGGGACTTGGAGGCTCCGCAGGGAGTCGCTGCCGGCATGGGCCAGCCCAA
GTCTTCTCCTGTTGGTCTTCTCGCTTGTGGTGAGCTGACCAGTACTTCTTCTTTCGGCGAGGTGGTTCAGTCCACGCCTCGCCCAGCCACCATGGCT
GCCAAAGTGGACGTCTGTCAAGTGAGGTACTTGACATTCTCCGACTCATCTCAAGGAATAAAACACTGGTTGATTAAAAACCTGCCTGTCTCTCACC
CTGATGTGTTAGAGATGAGATTACATGGCTTTGTGATCGCCTGGCAACAGTGAGCTCTCAACATTCTGCTTGCAGAGTTGAAGCTGAAAGTGCACT
GTTTTCCCATCCCGGACTCCTGGTCACATGCAGAAGTTGATGGATGGAGTGTGGCCCTTCGTCGCTCTGGTCAGATGACCTGTGTCAAGAAGGAA
TCTCCGGCTGAGTTCGCGCGCCGTAAGCGTGAACAAAAGTGGTCTTGGCTCATCAGGCGTCTGCAGAGGCGTTCAGCTGCTGAGCAAGCTGTGATC
GCTGAACAGCGGTTGACAAAGGCCCTGCATTTGCAGGCCAATAGTTTTTCCTTCGTCCCCACTGGGCCGAAGGGTTTCAAAGGTCTGGGAGAGCTG
GTAATCCCTACCCCTTCTGCTGAAGAGATCGCTTTTGGTTCCCTCCTTAGATGGCAAACGTGTTTCGTGTTTTGCCAAGGAGAGAGAAGAATACTC
GGTTTTCCGCTTGGTGCCAGTCAAATGCCGAACGTAAGAAGGCATTAAAACTAGCCGAGTTGGAACGTCAAAGGTTTAGATTGTCTTCGTTGGTCGC
TGACCCTCTTCGTGTGCTCGGATGTCAAATCCTGAGACGCTCAGTGGTGTCAATTTCTTTCGCCCCTGGTCTTTTGGCACTTCTTCACGTCGCTCTG
TCGTCCGAAGGGATTTCATCCATCGGGCTAGATACGCTGAGAAGTTCTTCTTGTCTGTCAATGGTTACATTGTTGATTTGGTCGGGAACAAGATA
AGGGTGTCCAGACATAGGACAGGATCTGGTGTCTCTTTTCGCGTTGATGGTGGTCAGGTCGCCCCTAAAGGACGAGTATCTTTGTGCTG
TTCTTCAGTCTAGGCTTGATCTAGTACCAAACCCCGGCGAGCCAGAGATCCTGACTATCGAGTTATTCCGTTTCGAGATACGAAGGTTATTTCTGGGAGG
TTTTTAAGTGAAGTGGACGGAACCTCGACCTATGGTCTTTAATGACCATGGCCAAGAGATGGAAAAGAGATTTTGGTTGCCCTAGCAATACTT
GCATTTTGTCTTTTTCGCGGTGACTCCGTTTCGTTTACTGTTGTCAACGAACAAG

> Cb_clean_k141_55778
```

GGAATACTCGTGTGCACCCCTTACGTCCAAACGGGTCTGGATATAAAACCACCACCAGATCTTTTGATCGATTGTGGCAAAGACTTCGTTTTGGACA  
AAGGGCGTCCAGTATTTCCACTTCCGTGGACAGACAAGGACATACACCAGCAGAGAAGATGGAGGCGAGTGTCTGGAGTGCCAACTCAGGGGGCCA  
ATACGAGCCCCGGTGAACACGACAGCGACATCGAGAATGAGCCGAGGCGCAGTGAATCGTCGGATGAAGACGACGAGTAGCCTTTCCGACGGCGAA  
GAGATCACTCGACTAGAGCAGTAGCGGCCATGGTAGGACCACTTTGCCTTCTCAATGTGTTGAGCTCCGCTAACCAACTCGTAGCCAACGCGTGGCT  
TGCGAAAGGCCGACTGCAGACCGGCAGAGGCTCCCGCATCA

>Cb\_clean\_contig\_2817

GTGGGTTGCCGCTGCCTCTCTGTCCGAGCTTCAAAAATCACTTGACTGTGTGGTAAAGGCTTCACATCCTTTCAACACCGCGCTTGTGAGTAAGCTG  
CGTGATGAGACGAACCTATTCTTTCAGAAGATCTCCGATTCTGAGCCAATAGGTGGTACAACCGTATCTGCCTTAGCTCATACATTCAAGACTCTATA  
CGCCTGCCCTAACAAATGGGTGCGGTTACGCACTAGAGATAAAACCAGAAGATGGAATGGTACTATTTCACTTGACTGAGTCTCCAGACGAAACCGTT  
AAAAACAGGTTGTGGTGGGTTTTGAATGGGAATGAGATTTTGCATGGAGGGGACAAAACCCCTGTTTCCCCAAGCACCGTCTCATTGGTTGGCTA  
GCAAAGGAATATTCGACACATGAGGTGATCATCGAGCCCCAAACCGGACTCTATGCTATCACAAGAGAAACCAGGGCCGTTTGCAATGCCCTCGCTTT  
CTCAGTTTCAGAAATGTGTCGACAAGATCATCCCTTCTGGTAGTCATTTCTCTCGTTCTAAAGTCGGTGAACCTCAAAGATCACATCAACCAGTA

> Cb\_clean\_k141\_41826

GCGAACACCACTTAAAGCAAGTGAATGTATGAAAACAACCTGACTTTTCGACGGGTAGAGAATTTAGCACTTTCTTGTTTCGGTCGCAAGAAAGGCAA  
ATCTGCCGTGAAAGCACCCGAGATTGGTGCGAGCTGTGGGACCTTGAAGTGTTCGCGACAGCTTTATGTTGGGGGGTGATTGGTGTGCGTGAAGG  
TTGTCACGTGTTGAAGAGTGATTGCCCACTGCCAACGCGGCGCACGGTTGCTATGCCAAGAGGTGAGACGTCGACTTCACCTTCAACTTTACTTCTG  
TACCTCGTCTTTGCCATTGGCGTTACATCAACAAAGACGACGCCCATCATTTCTTGATATCTCAATGAGACCCGAAGATGCATTTATGCCCTTGAATAC  
AGTCATCCTTCCCTGACGCGAGTACAAATATGAATAATTGGACAGCAGTACCAGACCAACGCGGGCGTGACGCCGGGCACCTTTGCGGGCCCCGAGT  
ATCAGAGCCACCAGTGATGAGGAGTTGGGCGCTGATAGCTTATAATACTGCGAGGCACCATGATACGA

> Cb\_clean\_contig\_1712

GAACACTTCAAGGTCCACAGCTCGCACCAATCTCGGGTGCTTTCACGGCAGATTTGCCTTTCTTGCGACCGAACAAGAAAGTGCTAAATTCTCTAC  
CCGTGAAAAGTCAGTTGTTTTATACATTCACCTTGCTTTAAGTGGTGTTCGCCAAGACAAT

>Cb\_clean\_k141\_13671

GTTTCATGTGGATGTCAAGTACCCTATAGTAACTAGGGAACATGTTTCCTCTCAACCAGGAGAGGAAAGCAACTTGACGCGGCGAGAGCTGTTGTTGT  
GGGGAGTGCGCAATACTTTGCATAGATTATGGCCAGCGATGTGAATCGACATACACGTGCGTGTCAGATCTTACAGCCAAGTTCCCGATCCTGGGCA  
ACATTGGTAGAAGCCTCTGACGAGACCTCATTCGCCGCCTTTGCCTGCTTGTTATTTGGAAAGCTGCGTGCGCGTCGGTTGCTTCCTGGAGAGGAG  
CCCGCTTTTGGTCTTTGAAAGCGTGATTTACTTTGTGATCTTTCTTTTGCCTTTTGAATTCAGTC

> Cb\_clean\_k141\_13420

CGCTGTTGCCACAACGGAGCGATCACCTCTAGAACACGTAGGTTCTTTGGAAAGATCGACATTCACGGCAAGAGCGCGACGGAAGAAGTTAAGG  
ACATTTTTGGATTCAAAGAACATGACGAGGTGTATCCTTACACTGGTAGACCGGAAAAGCCTCACGCCTATGAGGTTGAAACTCCGTTGCCTGTCAG  
CAATCGGTTTTCTTTTCGTGCAACTCATCGTCAGGCCAAGGTGATGGCCAACGACTTTGAAGAGAAGTGGAGAGAAGACTCTAAGTGCAGAGCAC  
GGACGTGGCACATCGAAGGTGATGACACACCGAAGCAAAAGCTTGCTCGGTCCCATCACCTTTGTGGTGTCCGGACACGTTCAACGAACGGTTC  
GACGAGATTTTCGTTGCCGCGTACATTTGGTTTTTCTTTCAACTCATTTGCACGTTTTACTTCTCGTTTTCTCGGCCTAGTCTTCGGCGGAAACCTGAC  
AATCACACGGAAGGAGGAGAGCATCCTCTTGGAGATGAGGGTTTTTCTGCATCATCCTCCTTACTCGTGTGCAAGTTAGGAACCAGAGGCGACCAG  
GTCCCTGTGATTATTACGCGAACGTTGCTGCACACTATGGTGTCCGCACACATTCGCACGTGTACAAAGATGTGACGACAGACGATCTTGAAAAGA  
TGAAAGTCGGAGACTTTTCATCTAGTTCGCTGGTTATTTGAATCTTGCGTACGCCTCACAACCTTGGTTATAAAAGAGTGTTCACCCCGCATGTGGAG  
GTTGAAAGGTCACAGGGTGTGAGCTACACCTTGTCAACCGAGTTCAAGATGGGTAGAAATCGACAAGATTTATTGCTGACTGGTCAAAGGTTTCTTGGT  
CCAATTACCTCCCCGCGTGGATAGCCACGCGGGTCACTGCTGTGTATGTGCCAACTTTCAGAAATTGGTGCATGTCTGGAAGCGACATCCCCGCGTTC  
TCATGACGGGCTGAACCTACTGGAGAAAGTAAAGAACACAGCGAAGTTCGATGAGGGTTGGACATCTGGCAGCTCATCAGTTTCAGTGATCCCTGA  
TGAGATCAAGTCAAGATGCCCCGAAATACCATCGGGTAACCATCTTGAGATATTAAAGGATTACAAAACGGTGCACATCCATGGTGGAGCTGGTACC  
GTGCAAACCGCCATCGCTTGCGGTGCACGACCGGTATCCACGACAAGACACTCGATAGAGTGTATCATAGGATGCCTGAGCCAGAGGATTTCAA  
CAACCTTCCATTGGGAAATTCATGGGTTGGTTGGTATCCGCTGGTTTCAACGTTAATGCACCAATAGAGGTAAGAGCATGGTGGTTGTTACAATGGTA  
TTGGTCCCAAAAGTGGAACCTATGCGTACGATGCATTAGTTACACTTGTTAAAGCTTACACCATATCATCGTATGTATACAACCATTGGGAGCTTTTCCT  
CATTCTTTTCTTACCGTTCCGGCAGTGGTCTGGAGAATGTTGTTTTCTTCAAATCATTATTCTCCATAGTCAAAAATTTGTGCGCTTGGTTTCTGGCG  
CTACCCTGTGTTGTGTTTGTAGATTCGAAAGTCACTTTCGTGGCAGGAATCTGGTCAATGCAAAACTTGTGGATGGGCGCGGCGCAAGATTTGTCT  
GCACTCATGGAGACACGATCTTCACTGGTTTGGGAGCCAGTGCAAAAGACCGTAGGAACGAAGAGATTGACGTTCCCTTTTCCCCTTGGGCATTGG  
AGCATGAAAGATAACCAAACCTGGTAAGATCTACGAAGGTAGATTTATTGGTCCCTCCGAGACTATCGGAGGGAACTTTCGCCTTGTGAGCACTACTC



AGGTTGGTGTTCACACCAAAGGGCCTGGCCAAAATATTCTTCCGTAAACACAATCAAGAAAAATGGAGAATAGCTCTGGCTGCCGCGATTGGTTTG  
ACCCATGATGAAGGTCTGCTCTTCTTCTCGAAGTTTCACAATGATAGTACGAAACCAGATGTCGTGTTGGAGGTTTTGGGGTCATCACCCCTACCACA  
AGCCGGACAAGGAAACGGTAACAAGAGTAGCTTTTCATTGACGTGGAGAAACCGGTTTCATCCAGGCCTATACCTCGGCTTCCCACAGTTGTTCCGC  
CTCCTCCGCTGTACCACCAGTGCAGGGAGTTAAGCAGAAGGGACCCAAGGTGGAACCTGGCTGATGGTGACACGTGGCTGCTTGCTGAAGGTTCT  
GAAGGTAAGTCAAATAGAGCTCGCTTCAGATCTCTCTTCCCACATGATTGGTGGTTGAGAGTGTCCGAAAGGGTCATGCCCTTTATGAATCAAGACG  
CATCCCGTGACGTTGGATACAAGTCCCGATCTTGGTCCCAATCTTCCCTTGTCTCAGATCCCTCAGAGAAGTTTGATGTCAACGCCCCAAAATACAC  
ACCTTCTAGCTCTTCCAAAGCATCAGGTTCAACACCTTTACGTGTTGATCCTGAAGCCTTTAGGAGGCAGCTGCAAGCCAAGGCTAAGAAAGTGGG  
TGCGACAGCGTCTTCCCGACCTGATGCGAGGGAGGCGTATCTGAAGGGTGCCAACGAGTTCAAACCTGAGAAGGTTTCTCATAGAAAAGCCCTTTC  
TGAGCCCACTCCGTCGAAGAAACCTTCTTCTGAATGGATGTCTATTTGCGGAGCATCCTCTGATTATCTCTTTGATGATGATCATGAGGACGCGAGAG  
ATTCGACGAAATCGGACATCGAAACTAATCCCGACCTTCTATCAGGCATTTCCGTTCTAAATCGACTTCAGATTTGGAGGGTGAAACACCGTCATTG  
AATTTACACCCCCGACCCCTGGTGATGTCTTGACTGTGCACCATCCGACACCACCTCGTTTGAGGGTCAATCACAGGATGAACAGACATACCGTAA  
TTGTACCTTCACCGGGTGAGAACACGTGCAATTGGAATGTAGGTTACTCGTCATTTGCATGGCCTCCAACGGAGGAACATCTGGAACCTCGAGACTC  
CAGAACCGCGGATATAGAAGAAAATCCCGGACCATGTGAAACCCTTGACCCCACTTTGCCTCAGTTTCGAGGTTCGGAGTGGTTCTCAGAGTTCAGT  
TGCCGCTGTCACTTCGGAGCGATCACCTTCAAGAACACGTAGGTTTCTTGGAAGATCGGCATCCATGGCAAAGCGCAACGGAAGAAGTTAAGG  
ACATTTTTGGATTTAAAGAACATGATGAGGTGTATCCGTACACTGGTAAAAACTCATCTTTTGTGAAAAGCATTATGAATTCCACTATGTTCTTTCTC  
ATTTACCTAAAGACAAGAAGTGGCGGTCATCAACCTTTATCAGGTGGGTTGCCGCTGCTTCTTTGTCCGAGCTTCAAAAATCACTTGACTGTGTCGT  
TAAGGCTTCCCACCTTTCAACACCGCGCTAGTGAGTAAGTTGCGTGATGAGACAAACTCCTTCTTCCAGAAGATTTCTGATTCTGAGCCAGTAGGC  
GGTACAACCATGTCTGCCTTAGCTCACACGTTCAAGACCCTATACGCCTGTCCAAACAATGGATGCGGTTATGCATTGGAGGTGAAACCGGAAGATG  
GAATTGTAAGTGTCCATCTGACAGAGTCCCCAGACGAAATCGCTAAGAATAGGTTGTGGTGGGTCTTGAATGGGAATGAGATTTTGCACGGAGGGG  
ACAAGGCTCCTGCCTCTCCAAGCACAATCTCATTGCGTTGGCTGGCAAAGGAGTATTCAACACATGAGGTGATAATTGAGCCCCAAACCGGACTCTGT  
GTTATCACAAGAGAAGCCAGGGCCGTTTCGCGATGCCCTCACTTTCTCAGTTTCAGAAATGTGTTGACAGGATTATTCCTACTGGTGGTCATTTCTCCC  
GCTCTGAGGTTCGACGACCTCAAAAATCACATCAACCAATACCTGGAGTCTACAGATGTCAAGATAGTGGATCCAGTGTGTTGGTTGCAGCGATGGCAAT  
GAGCTTCAAGTCAAAGTTCAATTGTCCAAAAGATGTCAGCTCTTTTGCAATTGATTTTAGACTTGACCGGAGGATGGTTGTTTTCTGCGCCACAGATT  
CCCCTGAAGACAAAATAAGGGGAAGCTTTATTGGTGCATTGGTGGTAGTGTCAATTGTCCATGGCGGGCTGCTAGGTATCGAAGATGGGAAGTCTTG  
TTCCCTTCACTGGATCACTATAGCAAGTTGTGGACGATGCCGCTTCCAAAACGGGTTGGGTGGACAGGTCATTTCGACGCTGAATACTTCACAAAG  
ATCTCAACCTGGCAAAGGCCCTCGACCGGTGTGAACCGATCGTTGTATTCTCTGAACACACATTGCAACGCACACTTTACCAATACTTTGATGGTG

TCAGTACAAAGGTGTTATCACCATCACATACTGCAATCGTTGCTTGTGTGGTAAAATCCCTGATGAAATGCCCTGAGAGCGGGGTAGGTTATGCTATA  
CAGTTCGATAGTCATGGGGCTTCGCTGTATGTGTGTCGACAACCGAACTCCGCAGAGGTGAACCGGTTGTGGTACTTTTACTGGGATTTTCTTTTCG  
TGCATGGGGGAAGAAAATCTTATGCTCCGGAACCCAGGCAGTTCTTCTACACTGAGCATCTCAACATAGATTATTCGATACCCATGCGCGAAGTTTTT  
GCTGGGGAAAGGTCTGCCCCAAATCCAATTCCTCACATTTGACTTTTACAGGAGTCAACAGGAATTGTTTTTTCGGTTTCCAGCAGCAAATAGATTTGTATG  
ATGTGCCGACACCGGCATTTCATGCATTTCGAGAGCACATGGTGTGGCTGAACAAGCCATTTCGTGACACAATAACCCAAAATGAGAACTCTCCAGTTCA  
ATTTTGAGCAAGTTGCCGCGATAGCCATGTGTTATAGATCAAGGATGCAATGCCCATGTCCGGAGTCAGCCATGGCTGTTGACTTTGACTTCGCCAAT  
GAGCGCATTGTGTTCTTTTCGAACTTAGGCAGTGGAAGTTTCCGCTGTGAGGGTCAAATGTGGTGGTGTATAAATGGAGTCGGACTAGTGCACACTG  
GTTCTACATTCCACACCTATCACAACCAAGTCCAACCAATTTGACCCGGTGCCCGAGTATGTAGGTACTGGGACGAGATTGTTTCTTTTACTTTGACTT  
GAGTTCTGCCAGCCTACGTTGGATTATTGGACATCAGATTTCCATTTGCAGCTTGACAAAGACGAGCAGCTACAGAGGGGCTCAGATTGCATTGGATG  
CGCATAGTGACCCTGTTGAGCCTTTTCAGCAGGGACATGGCCATATTTTCATGCATTTGAATCGATCAGACAAACAGCCCAAGCGGTTCGATATAACTGTC  
ATGAAGATTGAACATTTGATCATCATGGCATGCATATATCGTTTCGAAGATGGCATGCCCTACTGTAGGCACCTCAATGATTGTCAAGTTCGATTTGTCA  
AATCAGAGAGTGAGGTTTGGCGTTGCAAGAGGAACGTATCCTGAGTCAGATGGCAGGATGTGGTGGTATCTGCACGATGATTGCATGATCCACACG  
GGTAGGCCGGAAGGCTTCACACCGCTGGGGTGGAAGCGCCGTTGCCTGTCAGCAGTCGATTTTCTTTTCGTGCAACTCACCGCCAGGCCTGTGAA  
ATGGCCGACGGTTTTGAGAAAAGTTGAGAAAAGACCAAGATCCGTTTGCAAAGACAAGGGTGAAGAACCAATCATCATCCCTTTTCTGCGGA  
TCAACTTTTGACGAGAGGCACGATGAGGTATTCGTGTCCGCTTACATATGGTTCTACATCCAACCTCATTTGCACGTTTTATTTCTCCTTTTCCCGCCT  
AATCTGCGGCGAAGACCTGACGGTCACACAGAAGGGGGAGAGTATCCCGTTGCGGATGAGAGTTTTTTCAGCCTCATCTTCCCTCCTAGTGTGCAAG  
TTAGGGACTAGAGGTGACCAAGTTCCTGTTGATTATTACGCGAACGTGGCGGCACACTATGGTGTCCGTACACATTCCCATGTGTATAAAGACGTAAC  
AACAGACGATCTTGAAAAGATGAAAGTCGGAGACTTTTTCATCTAGTTCCGCTGGTTACCTGAATCTTGCGTATGCTTCTCAACTTGGTTACAAGAGA  
CTGTTCACTCCGCATGTGGAGGTGGAAAGGTCTCAAGGTGTAAGTTATACTTTATCACCAAGCTCAAAGTGGGTGGAAGCAACGAGGTTTCATTGCC  
GATTGGTTCGAAGGTTTCCTGGTCCAACTTTCTCCCTGCGTGGATAGCCACGAGGGTCACTGCTGTGTATGTGCCAACTTTCAGAATTGGTGCCTGT  
CCGGAAGCGACATCCCGCGTTCTCACGATGGGTTAAACTTATTGGAGAAAGTTAAAAACACAGCAGAGTATGAGGAAGGTTGGACATCCGGCAGCT  
CGTCAGTTTCAGTGATCCCTGACGAGATCAAGTCGAGATGCCCCGAAATACCATCGGGTAATCATCTTGAAATATTGAAGGATTACAAAACGGTGCA  
CATCCACGGGGGGGCGGCACTGTGCAGACCGCCATTGCCTGCGGTGCACGACCGGTTATCCACGACAAGACACTCGATAGAGTGTATCATAGGAT  
GCCTGAACCAAGGATTTCAAACAACCTCCATTAGCAAGTTTATGGGTTGGTTGGTGTCTGCTGGTTTCAAAGTTGACGCGCCAATTGAGGTGAG  
AGCGTGGTGGTTGTTACAATGGTATTGGTCCCAAAAATGGAAGTATGCGTACGACGCATTAGTTACACTTGCGAAAGCCTATACTATATGTTTCATATGT  
ATATAACCATTGGGAACTTTTCCTCATTCTTTTCTTTACCGTTCCAGCAGTGATCTGGAGGATGCTTTTCTCTTCCAAGTCATTGTTTCGCCATAGTCAA

AATCTGTGCGCTTGGTTTTTGGCGCTACCCTGTGTTATGCTTGCTAGATTCGAAAGTCACGTTTGTGGCGGGCATCTGGTCAATGCAAACTTGTGGA  
TGGGCGCAGCGCAAGATTTTCGCGGCACCTTATGGAGACACGTTCTCTACTGGTTTGGGAGCCAGTGCACAAGATCGTGGGAACGAAGAAGCTGACA  
TTCCCTTTTCCCCTTGGGCATTGGAGCATGAAAGATAACCAAACCTGGTAAGATCTACGAAGGTAGATTTATTGGTCCCTCCGAGACTATCGGAGGGA  
ACTTTCGCCTTGTGAGCACTACTCGTGAATACAAGCGTGGATTT

>Cb\_clean\_contig\_2550

GTGAACTCAAAGATCACATCAACCAGTACTTGGAACTTACAGATGTCAAGACAGTAGATCCTGTGTTGGTCGCGGCGATCGCAATGAGTTTTAAGTC  
GAAATTC AATTGTCCAAAAGAAACCAGCTCTTTCGCAATTGATTTTCAGACTCGACCGAAGAATGGTTGTTTTCTGTGCCACAGATTCCCCTGAAGAT  
AAGAACAAAGGGGAAACTTTACTGGTGCATCGGTGGTAGTGTTATCGTCCATGGCGGGTTGTTAGGTATTGAAGATGGGAAGTCTTGTTCCCCATCGT  
TAGATCACTATAGCAAGTTATGGACGATGCCACTTCCGAAATCAGGTTGGGTGGACAGATCTTTTGAAGCTGAATACTTCACAAAGATTTCAACCTG  
GCAAAAGGCCCTCGATCGGTGTGAACCGATCGTTGTATTCTCTGAACACACATTGCAACGCACACTCTACCAGTATTTTGATGGTGTGACAGACAAA  
GTTTTGTCCCCATCACATACTGCAATCGTTGCTTGTGTGGTAAATCCTTGATGAAATGCCCGGAGAACGGGGTAGGATATGCAGTACAGTTTGATAG  
CCATGGGGCTTCACTGTACGTATGCAGGCAACCGAATTCCGCAGAGGCGAACCGGTTGTGGTACTTTCATTGGGATTTCCCTTTCGTGCACGGGGGA  
AGAAAATCTTATGCTCCAGAGCCCAGGCGGTTCTTTTATACTGAGCATCTCAACATAGATTATTCCATACCCATGCATGAGGTTTTTGTGGAAGGAT  
CTACCTAAATCCAATTCTTCTCATTTGACTGTCAAGAGTCAACAAGAATTGTATTTTCGGTTTTCAACAGCAAATTGATATGTATGATGCGCCAACACCG  
GCCTTCATGCATTCAAGAGCACATGGCACAGCTGAGCAAGCCATACGTGACACAGTGCCCAAGATGAGAACCTCTCAGTTCAATTTTGAGCACGTT  
GCAGCGATAGCCATGTGTTATAGATCCAGAATGCAATGTCCATGCCCGGAATCAGCCATGGCTGTTGATTTTGATTTTCGCAAATGAGCGCATTGTGTT  
CTTTTCAAACCTAGGCAGTGGGTATTTCCGCTGTGAGGGCCAAATGTGGTGGTGTATAAACGGAGTCGGTCTGATCCACACTGGATCAATATTCCACA  
CCTACCACAACCAATCAAACCAATCTCGACCTAGTCCCCGAGTGTGTAGGTACTGGGACGAGATTGTTTCTTTTCATTTGACCGAATTCTGCCAACCC  
ACGTTGGGTTATTGGACATCGGATTTTCACTTGCAACCTGACAAAGACGAACAGTTGCAGAGGGCTCAGATTGCTCTGGATGCACATAGTGACCTG  
TTGAGCCTTTT CAGCAGGGACGTTGCAGTATTTTCATGCTTTTTGAGGCGATCAGACAAACGGCCCATGCGGTTCGATATAACTGTCATGAGGATTGAACA  
TTTGATCATCATGGCGTGCATATATCGTTTCGAAAATGGCGTGCCCTACAGCCGGCACTTCAATGATTGTCCAGTTTCGATTTGTCAAACCAAAGAGTGA  
GGTTCGGCGTTGCAAGGGGAACACATCCGGAGCTGGATGGCAGAATGTGGTGGTATCTGCACGACGATTGCATGATCCACACTGGTAGGCCAGAAA  
AACCTCACGCCAATGAGGTTGAAACTCCATTGCCTGTCAGCAGTCGGTTTTCTTTTCGTGCAACTCATCGTCAGGCCAAGGTAATGGCCAACGATTT  
TGAAGAGAAGTGGAGAGAAGACTCCAAGTGCAGAGCACGGACATGGCACATCGAAGGTGATGACACACCGAAGCAAAAGCTTGCTCGGTCCCAT  
CACCTTTGTGGTGTCCGGACACGTTCAACGAGCGGTTTCGACGAGATCTTCGTTGCCGCTTACATTTGGTTTTTCTTTCAACTCATTGTCACGTTTTA

TTTTTCATTTTCTCGACCAAATCTTCGGCGAAAACCTGACAAGCACACGGAAGGAGGAGAGCACCCCTCTTGGAGATGAGGGTTTTTCTGCATCATCC  
TCCTTGCTCGTGTGCAAGTTAGGAACCAGAGGTGACCAGGTCCTGTGCGATTATTACGCGAACGTTGCTGCACACTATGGTGTCCGCACACATTTCGC  
ACGTGTACAAAGATGTGACGACAGACGATCTTGGAAGATGAAAGTTGGAGACTTTTCATCTAGTTCCGCTGGTTATTTGAATCTTGCATACGCTTC  
ACAACCTGGTTATAAAAGAGTGTTACCCCCGCATGTGGAGGTAGAGCGGTCCCAAGGTGTGAGCTATACTTTGTACCCGAGTTCGAAGTGGGTGGA  
AGCAACAAGGTTCAATTGCTGATTGGTCAAAGGTTTTCTTGGTCCAATTTCCCTCCCCGCGTGGATAGCCACGAGGGTCACTGCTGTGTATGTGCCAACT  
TTTAGGATTGGTGCGTTGTCTGGAAGTGACATCCCGCGTTCTCATGACGGGCTGAACCTGCTGGAAGGTAAAGAACACAGCGGAGTTCGATGAG  
GGTTGGACATCTGGCAGCTCGTCAGTTTCAGTAATCCCTGACGAGATCAAGTCAAGATGTCCCGAAATACCATCGGGTAACCATCTTGAAATATTTAAA  
GGATTACAAAACGGTGCACATTCATGGTGGAGCCGGTACTGTGCAAACCTGCTATTGCTTGCGGCGCACGACCGGTCATCCACGACAAAACACTCGA  
TCGAGTGTATCATAGGATGCCTGAGCCAAAGGATTTCAAACAACCTTCCATCGGGAAGTTCATGGGTTGGTTGGTATCCGCCGGTTTTAACGTTAATG  
CACCAATAGAGGTAAGGGCGTGGTGGTTGTTACAATGGTATTGGTCCCAAAAGTGGAACTATGCGTACGACGCATTAGTTACACTTGCCAAAGCTTA  
CACCATATCATCGTATGTGTACAATCATTGGGAGCTCTTCCTCATTCTTTTTCTTCACCGTTCGCGCAGTGGTCTGGAGAGTGTTATTCTCTTCCAAATC  
ATTGTTCTCCATAGTAAAAATTTGTGCGCTTGGTTTTCTGGCGCTATCCTGTGTTGTGTTTGTAGATTCGAAAGTCACGTTTCGTGGCAGGAATCTGGTC  
AATGCAAACTTGTGGATGGGCGCGGCGCAAGATTTCTCTGCACTTATGGAGACACGATCTTCACTGGTTTGGGAGCCAGTGCAAAAGACCGTAGG  
AACGAAGAAGTTGACGTTCCCTTTTCCCCTTGGGCATTGGAGCATGAAGGACAACCAAACTGGTAAAATCTACGAAGGTAGGTTTGTGCGTCCCTC  
CGAGACTATTGGAGGGAATTTTCGCCTTGTAAGCACTACTCGTGAGTACAAGCGTGGGTTTAAGTCTTTTCCTGCCCCTTTCAATGTTGGCCATGCCG  
AGTCTCTTGTGAGGGCTCAGCACGTGGCACCATATTCATCTTCGCATAATTGTGTGACTATGATGGTGCAGCTTTGTGCCAAGAGATCGACTGCCTGG  
ACAGCATGTATGGTAATGGTAGGTGCCTTAACGGGGCTTGCCCTGGCGCCGCCAAAACCTGCTCAAGGACATTCTTTCCTTTCTTTTCCCTGGCAAGG  
ATTTTGCCAGTACTCCTTTTTATCGTTTCGCTTGGCTTTGCCGCATCGTTAGAAAACATCCCGTTTGAAATAGAAGGGATGGTCGAAACGACAGAGCCA  
ATGCCAGAGACAGCTACACCTGAACCAACAGATCTGACGGATCCAGATTCTTTCAATATGTTGGTCGACGAGATAGCGTTCATCCAGGCCTGCGTGG  
AACAACTCAAGATACCTACCTTGACAAGGAGGCGTTTGATGAGGTTTCACAGCGAACTTTAGAAAAGGAGTTGGACAAGGTCGAGATCCCTGAA  
GATTCGTTAATCAGGGTTTCCAACATACCACCGAGGGTGCACCATGAGTGGGCACAATTGGTGGATGGTCTCCACCATGCGATCTCTTTCGTGCGCA  
CAAACCGCGTTGCTGACGCATTTGTATTGTACGTTAAGAACGCTGGTGAAAATATATATGACTTTGTCCAGCCGATACTGGAAATCCTTTCCTTCTTTC  
TGCACCTTGCAGCTGAGCACTCTAAGCATGCGTTTCGATCGCCTGTTAAATGGCTTTGCGATTTCTTAGACCATGTGTGGGGTCTAGAAGCGTCAAA  
GAGAGTTAAAACAGTGTGGGGCCTAACTGGCCTTCATCGAACGGGATTGATTGGTGTACAAGCCAAACTTGCAGCTAATGTTGCTTATTCTGAGTTC  
GTAGGTAGACAAGATATCGAATCAGATTCAAACAAG



>Cb\_clean\_contig\_3446

ATGACGAAGGCTTGCTTTTCTTTTCAAAGTTCCACAATGATAACACGAAACCAGATGTTGTGTTGGAGACTTTGGGTTCGTCACCCTATCACAAGCC  
AGATAGGGAGACAGTGACGAGAGTGGCTTTTGTGATGTAGAGAGACCTGTCGCATCCAACCCTACGGCTCAGTCTTCCACAGTTGTCCCGCCTCCT  
CCGCCTCCACCGCCGGTGCAGGAGGTCAAGCAGAAGAGGAAGAAGACAGAGTTGGCTGATGGTGACACGTGGCTTCTTGCTGAAGGTTCTGAAG  
GCAAGTCAAACAGAGCTCGTTTTAGATCTCTCTTCCCACATGATTGGTGGTTGAGGGTGTCTGAGAGGGTTATGCCTTTCATGAATCAGGATGCGTCT  
CGTGACGTCGGGTACAGATCCAGATCTTGGTCTCAATCTTCCCTGGTTTCAAATCCTTCAGAGAAGTTTGATATAAACACGGTGAGGTATACACCTTC  
TAGTTCTTCCAAGGCATCAGGTTTCGACGCCTTTGCGGGTTGATCCTGAGGCTTTCAAGAGACAGCTTCAGGCTAAGGCTAGGAAGGTGAGTGCAAC  
GTCGTCCTCCCGTCCCGATGCGAGGGAGGTGTATCTGAAGGGTGTGGTGAGTTCAAACCGGATAAGGTTTCTCACAGAAAAGCCCTTTCTGAACC  
TGCTCCGTCGAGGAAACCTTCTTCTGAGTGGATGTCTATTTCTCGAGCGTCTTCTGATTATCTTTTCGATGATGATCATGAAGACGCAAGGGATTCTGA  
CTAAGTCAGACATTGAGACCAACCCCGGGCCTTCAATCAGACATTCCCGTTCCAAGTCGACCTCGGATTTGGAGGGTGAAACACCGTCGTTAAATTT  
TACACCACCCACCCCTGGTGATGTCTTGACTGTGCACCATCCAACACCGCCTCGTTTGAGGGTCAATCACAGGATGAATAGACACACTGTGATTGTA  
CCTTCGCCGGGTGAAAACACGTCGAATTGGAATGTGGGTACTCGTCATTTGCGTGGCCTCCAACAGAGGAGCATCTGGAACCTCGAGACTCCAGA  
ACCGCGGATATAGAGGAAAATCCCGGACCATGCGAAACCTTGACCCC

>Cb\_clean\_k141\_29346

ATCGTTGCTTGTGTGGTGAAATCCTTGATGAAATGCCCAGATAACGGGACAGGATATGCAGTACAATTTGACAGCCATGGGGCTTCATTATATGTATGT  
CGTCAACCAAATTCCGCAGAGGCCAAACCGACTGTGGTACTTTTACTGGGATTTTCCTTTTCGTGCACGGGGGAAGAAAATCTTATGCTCCAGAACCC  
AGACGGTTCTTTTACACTGAGCATCTCAATATAGATTATTCAATACCCATGCGTGAAGTTTTTGCTGGAAAAGATCTGCCCAAATCCAGTTCTTTCGCAT  
CTGACTGTCAGGAGTCAACAGGAATTGTTTTTTGGTTTTTCAGCAACAAATAGATTTGTATGATGTGCCGACACCGGCCTTCATGCACTCAAGAGCAC  
ATGGCGTGGCTGAACAAGCCATTCGAGACACAGTGCCCAAATGAGAACTACTCAGTTCAGTTTCGAGCAGGTTGCCGCGATAGCCATGTGTTATA  
GATCTAGGATGCAGTGCCCATGTCCGGAGTCAGCTTTGGCTGTGACTTTGACTTCGCCAATGAGCGCATTGTTTTCTTTTCAAACCTGGGCAGTGG  
AAGTTTCCGCTGCCGCGGTCAAATGTGGTGGTGTATAAATGGAGTCGGACTGATACACACTGGGTCCACATTCCACACCTACCACAACCGGTCCAAC  
CAATCTCGATCCAGTCCCCGGGTGTGTAGATACTGGGACGAGGTTGTTTCTTTTGACCTAACCGAGTTCTGCCAGCCTACGTTGGATCATTGGACGTC  
GGATTTCCATTTGCAACTCGACAAAGACGAACAGCTACGCAGGGCTCAAGTTGCATTGGATGCGCATGATGACCCTGTTGAACCTTTCAGCAGGGA  
CATTGCCATATTTTCATGCGTTTGAATCGATCAGACAAACAGCCCAAGCTGTGATATAACTGTCATGAAAATCGAACATTTGATTATCATGGCGTGCAT  
GTATCGTTCAAAGATGGCGTGCCCTACAGCAGGCACTTCAATGATCGTCCAATTCGACTTGCCAAACCAGAGAGTGAGATTTGGCGTTGCAAGAGG

AACACATCCCGAGCTAGATGGCAGAATGTGGTGGTATCTGCACGACGATTGCATGATCCACACAGGTAGACCGGAAACGCTTCACACCGATAAGGT  
GGAAGTGCCGTTGCCGTTGGCAGTCGGTTTTCTTTTCGTGCAACCCACCGTCAAGCCTGTGAGATGGCTGACGGTTTTGAGAAAACCTTGGAGAAA  
AGACCAAAGGTCCGTTTGCAAGAACAAGGGTAGAGATCACAAGCATCATCCCCTTTTCTGTGGGTCAACTTTTGACGAGAGGCACGATGAAGTGTT  
CGTGTCCGCGTACATATGGTTCTATATCCAACCTCATTTGCACGTTTTATTTCTCTTTTTCTCGTCCTAATCTGCGTAAAAAACCTAATGATCACACGGAA  
GGGGGAGAGTATCCCGCAGTAGACGAGGGGCTTTTCTGCCTCATCTTCCCTTCTTGTGTGTAAGCTGGGAACCAGAGGTGACCAGGTCCCTGTTGATT  
ACTATGCAAATGTGGCGGCACATTATGGCGTCCGCACACATTCACATGTGTACAAGAGCGTAACAACAGATGATCTTGAAAAGATGAAGGTCGGAG  
ACTTTTCATCTAGTTCCGCTGGCTATTTGAATCTAGCATACGCTTCTCAACTTGGTTACAAAAGAGTTTTACCCCGCACGTGGAGGTGGAGAGATCT  
CAAGGTGTGAGTTATACTTTGTCACCAAGTTCAAAGTGGGTGGAAGCAACGAGATTCATCGCTGATTGGTCGAAGGTTTCCTGGTCCAACCTCCTCC  
CCGCGTGGATAGCCACGAGGGTTACCGCTGTGTACGTACCAACTTTCAGAATTGGTGCATTGTCCGGAAGTGACATCCCGCGTTCTCATGACGGGTT  
GAACTTGTTAGAGAAGGTTAAAAACACAGCCAAGTATAATGAGGGTTGGACATCTGGCAGCTCGTCAGTTTCCGTGATCCCTGACGAGATCAAGTC  
AAGATGCCCTGAAATACCATCAGGTAACCATCTTGAAATATTAAAGGATTACAAAACGGTGCACATCCATGGCGGAGCTGGTACCGTGCAAACCGCC  
ATTGCTTGCGGTGCACAACCAGTCATCCACGACAAAACACTCGATAGGGTGTATCACAGGATGCCTGGGCCAAAAGATTTCAAGCAACCTACCATC  
GGGAAGTTCATGGGTGGTTAATATCTGCAGGTTTCAAGGTCAAAGCACCAATTGAGGTAAGAGCATGGTGGTTGTTACAGTGGTACTGGTCCCAGA  
AGTGGAACATATGCGTATGATGCATTAGTTACGCTTGCGAAAGCCTACACCATATCCTCATATGTATACAACCATTTGGGAGCTCTTCCTCATCCTTTTCTT  
CACTGTTCCAGCAGTGGTTTGGAGAATGTTGTTTTTCATCAAAATCACTGTTTTCCATAGTCAAGATCTGCGCATTAGGTTTCTG

>Cb\_clean\_k141-6204

GGTGCTCTTACACAGGCCCTCAGGGGACATATATAAGAGATGATTGCTCCACGCTTTCAGTGGATTCCATTTGTCAAAGGTGGTTTTCTTTGTCTG  
GAAGCAGATAATTTCTGCAATCGGATCCTTGCGGATCGCGGCACGTGCTATGCCGAGGCCTCTGTGAGGCCGTTGCCCTTTCCGGGCATTGTCAATT  
GTGACGAGGTGCGGTGCACCGAGCTATCGCGTCTACGAGTCCGTAATGACTGTAAACTATTACAACAGGGCGGTGTCACACCCAAATGTGTATAAAC  
TTGCGCGTTTTCGGAGCGTTCTCAAACGCTGGCCTACACTGGGTAAACGGATGGTGATCAGAACGGCGATGAGGTAAGTGTGGGCTAGTGACCCTAG  
AAGTTATCCACCTCATTGTGAACCATCTTCCCTTTAAGATTTAGAAATGAGCACCGCTCTAAACGGTTAACACCATTTTGTTCGCTTCCCTCTGGA  
CGGGACGATTCAAAATGTCTTCTATCAATTTCTTCGTTTGGATCAACGCAAAGATCCCGGGAGGCTCCGAGTGCCTAAAGAACGGTCTGCTATCCG  
TTCATCCTATTCAAGTTCAGCCGGGACTTGGAGGCTCCGCAGGGAGTCGCTGCCGGCATGGGCCAGCCCAAATCTTCTCCTGTCGGTCTTCTCGCT  
TGTGGTGAGCTGACCAGTACTTCTTCTTTTCGGCGAGGTGGTTCAGTCCACGCCTCGCCCAGCCACCATGGCTGCCAAGGTGGACGTTTGTCAAGTG  
AGGTACTTGACATTCTCCGACTCGTCTCAAGGAATAAAACACTGGTTGATTAAAAGCCTGCCTGTCTCTCACCTGATGTGTTAGAGATGAGATTACA

TGGCTTTGTCGATCGCCTGGCAACAGTGAGCTCTCAACATTCTGCTTGCAGAGTTGAAACTGAAAGTGCAGTGTTCCTCCCATCCCGGACTTCTGGT  
TACATGCAGAAGTTGATGGATGGAGTGTGGCCCTTCGTCGCTCTGGTCAGATGACCTGTGTCAAGAAGGAATCTCCGGCTGAGTTCGCGCGCCGTA  
AGCGTGAACAGAAGTGGTCTTGGCTCATCAGGCGTCTGCAGAGGCGTTCAGCTGCTGAGCAAGCTGTGATCGCTGAACAGCGGTTGACAAAGGCC  
CTGCATTTGCAGGCCAATACTTCTTCCTTCGTCCCCACTGGGCCGAAGGGTTTCAAAGGTCTGGGAGAGTGGTACTCCCTACCCCTTCTGCTGAAG  
AGATCGCTTTTGGTTCCTCCTTCCTAGATGGCAAACGTGTTCTGTGTTTTGCCAAGGAGAGAGAAGAACAACACTCGGTTTTCCGCTTGGTGCCAGTCAAA  
TGCCGAACGTAAGAAGGCATTAAAACTAGCCGAGCTGGAACGTCAAAGGTTTAGATTGTCTTCGTTGGTCGCTGATCCTCTTCGTGTGCTCGGATGT  
CAAATTCCTGAGACGTTTAGTGGTGTCAATTCCTTCGCCCCGTGGTCTTTTTGGCACTTCTTCACGTCGCTCTGTCTCGTCCGAAGGGATTTCATCCATCG  
GGCTAGACACGCTGAGAGGTTCTTCTTCTGTCTGTCAATGGTTACATTATTGATCTGGTCGGGAACAAGATAAGGGTGTCCAGAAATAGGGCGGGA  
TCTGGTGTCTCTTTTCGCATTGATGGTGGTCAGGTCGCCCCTGCGGCCTAAAGGACGAGTATCTTTGTGCCGTTCTTCAGTCCAGGCTAAATCTCAT  
ACCAAACCCTGGCGAGCCGGAGCTCCTGACTATCGAACTGTTTCGTTTCGAGGTACGAGGACTATTCGGGAGGTTTTTGACTGAAATGGACGGAAC  
CAACCTCGACTTGTGGTCTTTAATGACCATGGCCAAAAGGTGGAAAAGAGATTTTGGTTGCCCTGGCAACACTTGCATCTTGTCTTTTGCGGGTGGT  
TCGGTCTCGTTTACTGTTGTTAACGAACAGGACGATCTGCCGCCGGCTTTGTGGTTTCGCCTTGATGGCAAAGATTTGTTCCACTGCGGCGTTGACC  
AGGTCAAGAGACTGCAGTTCCAGAAGAACATCTGAAAAGCAGTTGCCAAGATGGTCATCCAGGACGGTAGCCCTGCTGAACAGCGGTTGGCAGAG  
AAGGTCTCCTCCTCCGCACACGTGAGTGTCCCTTGCTGAAACCTAACTTGTTCCACCAGTTAACAACCGTTTCAGGGTCTGCGCCAAGTTCTCCG  
GGCTTAGCGTTTTTTGAGCGCGGGCTCGACTTTACACGCCCTGATCCTCGTGTCTGAAGGCGGCTTCATCACAACCAGACAGGAGAGGTTGTTTTGGG  
ACGTAGGGGCAAGCAGGTTGGTGTTCACACCAAAAAGGCCTGGCAAAGATATTCTTCCGCAAGCACAATCAAGAAAAATGGAGGATAGCTTTGGCTG  
CTGCGATTGGTTTGACCTATGACGAAGGTCTGCTTTTCTTTTCAAAGTTTCACAATGATAACACGAAACCAGATGTTGTGTTGGAGACTTTGGGTTCTG  
TCACCCTATCACAAGCCAGATAGGGAAACAGTGACAAGAGTGGCTTTTGTGACGTGGAGAAACCTGTCGCACCCAACACTACGCCTCAGTCTTCC  
ACAGTTGTTCCGCCTCCGCCGCTCCACCGCCGGTGCAGGAAGTCAAGCAGAAGGGAAAGAAGACAGAGTTGGCTGATGGTGACACGTGGCTTCT  
TGCTGAAGGTTCTGAAGGCAAGTCAAACAGAGCTCGTTTTAGGTCTCTCTCCCAAATGATTGGTGGTTGAGGGTATCTGAAAGGGTCATGCCTTTC  
ATGAATCAAGACGCATCTCGTGACGTGCGGTACAGATCCAGATCTTGGTCTCAATCTTCCCTGGTTTCAAACCCTTCAGAGAAGTTTGATATAAACGC  
GGTGAGGTACACACCTTCTAGTTCTTCTAAGGCATCAGGTTCAACACCTTTGCGGGTTGATCCTGAGGCTTTCAAGAGACAGCTTCAGGCTAAAGCT  
AGGAAAGTGAGTGCACATCGTCTTCCCGTCCCGATGCAAGGGAAAGTGTATCTAAAGGGTGTGGTGAGTTCAAACCGGACAAGGTTTCATCAG  
AAAAGCCCTTTCTGAACCTACTCCGTGAGGAAACCTTCTTCCGAGTGGATGTCTATATCTCGAGCATCTTCTGATTATCTTTTCGACGACGATCATG  
AAGACGCAAGGGATTGACTAAATCAGATATTGAGACCAATCCTGGACCTTCGATCAGGCATTTCGGTTCCAAGTCGACTTCAGATTTGGAGGGTGA  
AACACCGTCTTTAAATTTTACACCACCTACCCCTGGTGATGTCTTGACTGTGCACCATCCGACACCACCTCGTTTGAGGGTTAACCACAGGATGAATA

GACACACTGTGATTGTACCTTCGCCGGGTGAGAACACGTGCGAATTGGAATGTAGGTTACTCGTCATTTGCTTGGCCTCCAACAGAGGAGCATCTGGA  
ACCTCGAGACTCCAGAACCGCGGATATAGAAGAAAATCCCGGGCCAAGTGAAACCCTTGACCCCACTTTGCCCCAGTTCCGGGGTCGAAGTGGTTC  
ACGGAGTTCAATCGCTGTTGTCACAACGGAGCGATCACCTCTAGAACGCGTAGGTTCTTTGGAAAGATCGGCATTACGGCAAGAGCGCGACGGA  
AGAAGTCAAGGACATTTTTGGATTCAAAGAACATGACGAGGTGTATCCTTACACTGGCAAGAACTCATCGTTTCGTGGAGAAGCATTATGAATTCCAC  
TATGTCCTTTCTCATTTACCTAAGGACAAGAAGTGGCGGTCGTCAACCTTCATCAGGTGGGTTGCCGCTGCTTCTCTGTCCGAGCTGCAAAAATCAC  
TCGACTGTGTAGTAAAGGCTTCACATCCTTTCAACACCGCACTTGTGAGTAAGCTGCGTGATGAGACGAATTCCTTCTTTCAGAAGATCTCCGATTCT  
GAGCCGATAGGTGGTACGACCGTATCCGCCTTAGCTCACACATTCAAAACCCTGTACGCCTGCCCTAACAATGGGTGCGGTTATGCACTAGAGATAA  
AGCCAGAAGATGGAATGGTATTATTCCATTTGACTGAGTCTCCAGACGAAACCGTAAAAAACAGGTTGTGGTGGGTTTTGAATGGGAACGAGATTTT  
GCATGGAGGGGATAAAACCCCTGTTTCCCCAAGCACCGTCTCATTCGGTTGGCTAGCAAAGGAATACTCGACACATGAGGTGATCATCGAGCCCAA  
ACCGGACTCTATGATATCACAAAGAGAAACCAGGGCCGTTTGCAATGCCCTCGCTTCTCAGTTTCAGAAATGTGTCGACAAGATTATTCCTTCTGGTG  
GTCATTTCTCTCGTTCTAAAGTCGGCGAACTCAAAGATCACATCAACCAGTATCTGGAATCTACAGATGTCAAGACAGTAGATCCTGTGTTGGTCGC  
GGCGATCGCGATGAGTTTTAAGTCGAAATTCAATTGTCCAAAAGAAACCAGCTCTTTCGCAATTGATTTTCAGGCTCGACCGAAGAATGGTTGTTTTTC  
TGTGCCACAGATTCCCCTGAAGATAAGAACAAGGGGAAACTTTACTGGTGCATCGGTGGTAGTGTTATCGTCCATGGCGGGTTGCTAGGTATTGAAG  
ATGGGAAGTCCTGTTCCCATCGTTAGATCACTATAGCAAGTTATGGACGATGCCACTTCCGAAATCAGGTTGGGTGGACAGATCTTTTGAAGCTGA  
ATACTTCACAAAGATTTCAACCTGGCAAAAGGCCCTCGATCGGTGTGAACCGATCGTTGTATTCTCTGAACACACATTGCAACGCACACTCTACCAG  
TATTTTGACGGTGTGACAGACAAAGTTTTGTCCCCATCACATACTGCAATCGTTGCTTGTGTGGTGAAATCCTTGATGAAATGCCCGGAGGACGGGA  
TGGGATATGCAGTACAGTTTGATAGCCATGGGGCTTCACTGTACATATGCAGGCAACCGAATTCGCGAGAGGCGAACC GGTTGTGGTACTTTTCATTG  
GGATTTCCCTTTTCGTGCACGGGGGAAGAAAATCTTATGCTCCAGAGCCTAGGCGGTTCTTTTATACTGAGCATCTTAACATAGATTATTCCATACCCAT  
GCATGAGGTTTTTGTGGAAAGGATCTACCCAAGTCCAGTTCTTCGCATTTGACTGTCAAGAGTCAACAAGAGTTGTATTTTCGGTTTCCAACAACAA  
ATCGATCTGTATGATGCGCCAACACCGGCCTTCATGCATTCAAGAGCACATGGCACAGCTGAGCAAGCCATACGTGACACAGTGCCCAAGATGAGA  
ACTTCTCAGTTCAATTTTGAGCAAGTTGCTGCGATAGCCATGTGTTATAGATCCAGAATGCAATGTCCATCTCCG

>Cb\_clean\_k141\_45450

TCGTGGTTGAGGGGAACATGTTCCCTAGCTACTACAGGGTACTTGACATCCACATGAACGTCGCAAAAGTAGATCCAGAACGACACGCTAAATTCC  
TTCGTAAACTTGAGAAAGGTTGCCATCCAGTGTATGTCGTACGCTGTGCTTGTGCTGCGCCAATGGCGAGCGAGAGGAGAAGTGCTTTGGAATACAT  
CGTCGTTCTTCGTCTTCACAACCACCACTGGACACTCTCCAGTGTGAAGACCGCAGTTTCATTTTCGGCGCTTTATATCTGCTGACGAGGCTTATCAT

CCTGTCACCAGATTACTTCTTTTTTGTTTAGTTTATTCTTATCAACCAGAGAAGAACTAGTACGCGTCATCACCATCTAGGACAGAGATTGGCAGTTC  
AAAAAACTCATCATCACAACAAACATCTCAGGCTGTGACCAAATTTCTTCTCACCCTACCAAAAAACCACGATGTCAAGCATCTCCGAGGACAG  
CATCTACACGAACGGCGACAGCGCCAGCGTGAGCAATGGCGAGAATCCCGCCGATGATGAGCTCTTTCTCTTCACCTCAGAGTCCGT

> Cb\_clean\_contig\_340

GTTACGAACCGGAACGGCCGACGAGCACATGACCACAGAGAAGCACTGAACAAATAGCCACGCGTCCCGCGCCCAACACCGTCTTTCACCATCG  
TTCTCTCGCGAATTCCCCGAACCATCCTCACCTATGCAATGAGGCATGACCACGCCGAACGGATACCACAAGCCTCACGAACAGGACGGCCTCCAT  
GATGACGATCGCGATTTCGGATTTGGACCTCGACCTGAATGAGCTTGATCCGCATCCTGTCACCGACCGTACACCATCTCATTTCGCGCCAGCCGAGTTC  
TGGTCGCATCAGCCATGACTTTGCTGCGCGAATACCTTTGCGAAATTTGCGCTTTGGAGGGCGACGGAGACCGCGCAACGAAGATACAGAAGATCT  
GGAAGCGCTGGTAGGGGACGATGAAGATGGACCGAAGCCGTCGACCGCCAGCTCAGGAGCGTCTGCATACGATGATGCGCCGCTGCTTTCACAGC  
AGAATGGAGGCACGCGGAAGTTCTCGCAGCTCGGATCCAACCGTTTTGGCGACAATCGCCGACCAAAAGGCATCTGGCAATATGTGCCTTTCATGA  
ACCGATCAACCTCCATACAGCTGCCGGCAATAAGTGAAGACGAGGCCGAAGATGATCATGATCCAGCGAGCGCCAGAAATATTGCTGTGGGGCAGA  
AGCAACCGGCGCGGTTCCCAGCGAATGCCATATCGAATGCAAAATACACGCCCTGGTCGTTCTTGCCGAGAACACTCTTCAATGAGTTCAAGTTCTT  
CTTCAACATGTACTTCTACTCGTCGCATTATCGCAAATCATTCCCGCACTCCGAATCGGCTACCTTTTCGACGTACATCGCGCCTCTTGCCCTTGTACT  
CATGATCACCTTAGTAAAGAGGCGTTTCGACGATCTGAGTAGGAGGAAACGGGACAGAGAAGCCAACAGTGAGCCTTACAGAGTGCTGCGATTTCG  
ACAGTCCTGGCTTCTCCGATACGGACGCTAGCAGCAAGAAAAGGAAGATCAAGAGCATAACAGAGAAAAAGAAGAAAGGGAAGCGCAGAAGAGT  
GTCAGCAGAAGATGCAAGGCTACAGCAGGCCGAGGACGAAGAGTACAGCACACAGAATGTAGACGCCCCCTTCGTCAAACGTTGCTGAAATCATCA  
AACCATCGGCCCAGCTCAAGGTTGGTGATGTGATTGTGCTCGAGAAGGATCAAAGAGTGCCTGCAGATGTGGTCATCCTGAAGAGCTTCTCGGCAG  
AAACCGTTCAGACAGAGGCAGAACCTCGACAAGAGACGGTCGAAGAAGCGCTTGTGGATATGGGCGAGAACGCTGCACCTGTCAGCCACGTCTA  
CAACGTCAGTCTATTCAAGGTGTACAATTGAGCAACGAGACCACTTCATCCGATCCGAGTGGCGGAGGTGAAGCTTTCATTCGTACTGATCAGCTGG  
ATGGAGAGACCGACTGGAAGCTGCGCCTGGCCACACCACTTGCGCAGACATTGCCCGCATCCGAGTATCTCAGGTTGCGAGTGACCGCCGGCAAA  
CCAGACAAACGAGTCAATGACTTGGATTGCTCCACGCTTTCAGTGGATTCCATTTGTCAAAGGTGGTTTTCTTTGTCTGGAAGCAGGTAATTTCTG  
CAATCGGATCCTTGCGGATCGCGGCACGTGCTATGCCGAGGCCTTTGTGAGGCCGTTGCCCTTCTCGGGCGTTGTCAATTGTGACGAGGTGCGGTTT  
ACCGAGTTATCGCGTCTACGAGTCCGGAATGACTGTAACTATTGCAACAGGGCGGTGTCACACCCAAATGTGTATAAACTTGCGCGTTTTCGGAGCG  
TTCTCAAACGCTGACCTACACTGGGTAAACGGATGGTGATCAGAACGGCGATGAGGTAAGTGTGGAGTAGTGACCCTAGAAGTTATCCACCTCATTG  
TGAACCATCTTCCCTTTAATATTTAGAAATGAGCACCGCTCTAAACGGTTAACACCATTTTGTTTTCGGCTTCCCTCTGGACGGGACGATTCAAAATG

TCTTCTATCAATTTTCTTCGTTTGGATCAGCGCAAAGATCCCGGGAGGCTCCGAGTGCCTAAAGAACGGTCTGCTATCCGTTTCGTTCTATTCAAGTTC  
AGCCGGGACTTGAGGGCTCCGCAGGGAGTCGCTGCCGGCATGGGCCAGCCCAAGTCTTCTCCTGTTGGTCTTCTCGCTTGTGGTGAGCTGACCAG  
TACTTCTTCTTTTCGGTGAGGTGGTTCAGTCCACGCCTCGTCCAGCTGTCATGGCTGCCAAGGTGGACGTTTGTCAAGTGAGGTACTTGACATTCTCC  
GACTCGTCTCGAGGAATAAAGCGCTGGTTGGTTAAGAGCTTGCCTGTTTCTCATCCTGATGTATTAGAGATGAGCTTGCATGGCTTTGTTGATCGCCT  
GGCAACGGTGAGTTCTCAGCATTCTACTTGCAGAGTTGAGGCTGAAAGTGTCTTGTTTTTCTCCATCCCGGGCTTCTGGTCACATGCAGAAAGTTGATG  
GATGGCGTGTTGGCTCTTCGTCGCTCTGGTCAGATGACCTGTGTCAAGAAGGAATCTCCGGCTGAGTTTGC GCGCCGTAAGTGTGAACAGAAGTGG  
TCTTGGCTCATCAGGCGTCTGCAGAGGCGTTCAGCTGCTGAGCAAGCTGTGATCGCTGAACAGCGGTTGACAAAGGCCCTGCATTTGCAGGCCGAT  
ACTTCTTTCTTCGTCCCTACTGGGCCGAAGGGTTTCAAAGGTCTGGGAGAGTTGGTACTCCCTGCCCCCTTCTGCTGAAGAGATCGCTTTTGGTTCTT  
CTTTCCTTGATGGTGAACGTGTTTCGTGTTTTGCCAAAGAGAGAGAAGAACATTCGGTTTTCCGCTTGGTGCCAGTCAAATGCTGAACGTAAGAAGG  
CATTGAAACTAGCCGAGCTGGAACGTCAAAGGTTTCGATTGTCTTCGTTGGTTGCTGATCCTCTTCGTGTTCTCGGATGTCAAATTCCTGAGACATTC  
AGTGGTGTCAATTTCTTTTCGCCCGTGGTCTTTTTTGGCACTTCTTTCACGTTCGCTCTGTCTCGTCCGAAGGGATTTTCATCCATCGGGCTAGATACGCTGAGAG  
GTTCTTCTTTTGTCTGTCAAGTGGTTACATTATTGATTTGGTTCGGGAACAAGATAAGGGTGTCCAGAGATAGGGCGGGGTCTGGTGTCTCTTTTCGCG  
TTGATGGTGGTCAGGTCGCCCATTGCGGCCTAAAGGACGAGTATCTTTGTGCCGTTCTTCAGTCTAGGTTTCGATCTCATACCAAACCTCTGGCGAGCC  
GGAGTTCTTGACTATTGAGCTGTTCCGTTTCGAGATATGAAGACTATTTTCGGGAGGTTTTTGAAGTGAATGGACGGAACCAATCTCGACTTGTGGTCTC  
TAATGACCATGGCCAAAAGGTGGAAAAGGGATTTTGGTTGCCCTGGCAACACTTGTATTTTGTCTTTTTCGCGGTGATTCGGTCTCGTTTACTGTTGTT  
AACGAACAGGACGATCTGCCGCCGGCTTTGTGGTTTCGCCTTGATGGTAAAGATTTGTTCCACTGCGGCGTTGACCAGGTCAAGAGACTGCAGTTC  
CAGAAGAACATCTGGAAAGCAGTCGCCAAGATGGTCATCCAGGATGGCAGCCCTGCTGAACATCGGTTGGCAGAGAAGGTTTCCTCCTCTGCACAC  
GTGAGTGTCCCTTGTCTAAAACCTAACCTGTTCCACCAGTTAACAAACGGTTTTTCAGGGTCTGCGCCAAGTTCTCCGGGCTCAGCGTTTTTTCGCGCG  
GGCTCGACTTTACACGTCCTGATCCTCGGGTTGAAGGTGGTTTTATCACGACCAGGCAGGAGAGGTTGTTTTGGGACGTAGGGGCAAGCAGGTTGG  
TGTTACACCAAAAAGGCCTGGCAAAGATATTCTTCCGCAAGCACAAATCAAGAAAAATGGAGGATAGCTTTGGCTGCTGCGATTGGTTTGACCTATGA  
CGAAGGTCTGCTTTTTCTTTTCAAAGTTTCATAATGATAACACGAAACCAGATGTTGTGTTGGAGACTTTGGGTTTCGTCACCCTATCACAAGCCAGATA  
GGGAGACAGTGACGAGAGTGGCTTTTTGTTGACGTGGAGAAACCTGTTGCGTCCAACCCTATGGCTCAGTTTTCCACAGTTGTTCCGCCTCCTCCGC  
CTCCACCGCCAGTGCAGGAAGTCAAGCAGAAGGGGAAGAAGACAGAGTTGGCTGATGGTGACACGTGGCTTCTTGCTGAAGGTTCTGAAGGCAA  
GTCAAACAGAGCTCGTTTTAGATCTCTCTTCCACATGATTGGTGGTTGAGGGTGTCTGAGCGGGTTATGCCTTTTCATGAATCAGGATGCGTCTCGTG  
ATGTCGGGTACAGATCCAGGTCTTGGTCTCAATCTTCCCTGGTTTCAGATCCTTCAGAGAAGTTTGATATAAACACGGTGAGGTATACACCTTCTAGT  
TCTTCCAAGGCATCAGGTTTCAGTGCCTTTGCGGGTTGATCCTGAGGCTTTCAAGAGGCAGCTTCAGGCTAAGGCTAGGAAGGTGAGTGCAACGTCA

TCCTTCCGTCCCGATGCGAGGGAGGTGTATTTGAAGGGTGTGGTGAGTTCAAACCGGATAAGGTTTCTCACAGAAAAGCCCTTTCTGAACCTACTC  
CGTCGAGGAAACCTTCTTCTGAGTGGATGTCTATTTCTCGAGCGTCTTCTGACTATCTTTTTGATGATGATCATGAAGACGCAAGAGATTTCGACTAAG  
TCAGACGTTGAGACTAACCCTGGGCCTTCGATCAGGCATTTCCGTTCCAAGTCGACTTCGGATTTGGAGGGTGAAACACCGTCTTTAAATTTTACAC  
CACCTACCCCTGGTGATGTTTTGACTGTGCACCATCCGACTCCACCTCGTTTGAGGGTTGATCACAGGCTGAATAGACACACTGTGATTGTGCCTTC  
ACCGGGTGAAACACGTCGAATTGGAATGTTGGTTACTCGTCATTTGCTTGGCCTCCAACAGAGGAGCATCTGGAACCTCGAGACTCCAGAACCGC  
GGATATAGAAGAAAATCCCGGGCCAGGTGAAACCTTGACCCTACTTTGCCCCAGTTCCGGGGTCGAAGTGGTTCACGGAGTTCAATCGCTGTTGC  
CACAAACGGAGCGATCACCTCTAGAACACGTAGGTTCTTTGGAAAGATCGACATTCACGGCAAGAGCGCGACGGAAGAAGTTAAGGACATTTTTG  
ATTCAAAGAACATGACGAGGTGTATCCTTACACTGGCAAGAACTCATCGTTCGTGGAGAAGCATTATGAATTCCATTATGTCCTTTCTCATTTACCTAA  
GGACAAGAAGTGGCGGTCTTCAACCTTCATCAGGTGGGTTGCCGCTGCTTCTCTGTCCGAGCTTCAAAAATCACTTGACTGTGTAGTAAAGGCTTC  
ACATCCTTTCAACACCGCGCTTGTGAGTAAGCTGCGTGATGAGACGAATTCCTTCTTTCAGAAGATCTCCGATTCTGAGCCGATAGGTGGTACGACC  
GTATCTGCCTTAGCTCACACATTCAAGACTCTGTACGCCTGCCCTAACAATGGGTGCGGTTATGCACTGGAGATAAAGCCAGAAGATGGAATGGTGT  
TATTTCAATTGACTGAGTCTCCAGACGAAACCGTTAAAAACAGGTTGTGGTGGGTTTTGAATGGGAATGAGATTTTGCATGGAGGGGATAAAACCCC  
TGTTTCCCAAGCACCGTCTCATTTCGGTTGGCTAGCAAAGGAATATTTGACACATGAGGTGATCATCGAGCCCAAACCGGACTCTATGCTATCACAA  
GAGAAACCAGGGCCGTTTGCAATGCCCTCGCTTTCTCAGTTTCAGAAATGTGTGCGACAGGATTATTCCTTCTGGTGGTCATTTCTCTCGTTCTAAAGT  
CGGTGAACTCAAAGATCACATCAACCAGTATCTGGAATCTACAGATGTCAAGACAGTAGATCCTGTGTTGGTCGCGGCGATCGCGATGAGTTTTAAG  
TCGAAATTCAATTGTCCAAAAGAAACCAGCTCTTCGCAATTGATTCAGGCTCGACCGGAGAATGGTTGTTTTTTGTGCCACAGATTCCCCTGAAG  
ATAAGAACAAAGGGGAACTTTACTGGTGCATCGGTGGTAGTGTTATCGTCCATGGCGGGTTGCTATGTATTGAAGATGGGAAGTCTTGTTCCCCATCG  
TTAGATCACTATAGCAAGTTGTGGACGATGCCACTTCCGAAATCAGGTTGGGTGGACAGGTCTTTTGACGCTGAATACTTCACGAAGATTTCAACCT  
GGCAAAGGCCCTCGATCGGTGTGAACCGATCGTTGTATTCTCTGAACACACATTGCAACGCACACTTTACCAGTATTTTGATGGTGTGACAGACAA  
AGTTTTGTCCCCATCGCATACTGCGATTGTTGCTTGTGTGGTAAAATCCTTGATGAAATGCCCGGAGGACGGGGTGGGATATGCAGTGCAGTTTGATA  
GCCATGGGGCTTCACTGTACGTGTGTCGGCAACCGAATTCCGCAGAGGCGAACCGGTTGTGGTACTTTTCATTGGGATTTCCCTTTTCGTGCACGGGGG  
AAGGAAATCTTATGCTCCAGAGCCTAGGCGGTTCTTTTATACTGAGCATCTTAACATAGATTATTCCATACCCATGCATGAGGTTTTTGTGGAAAGGA  
TCTACCCAAGTCCAATTCTTCGCATTTGACTGTCAGGAGTCAACAAGAGTTGTATTTCCGTTTCCAACAACAAATCGATTTGTATGATGCGCCAACAC  
CGGCCTTCATGCATTCAAGAGCACATGGCGTAGCTGAGCAAGCCATACGTGACACAGTGCCTAAGATGAGGACTTCTCAGTTCAATTTTGAGCACAT  
TGCTGCGATAGCCATGTGTTATAGGTCCAGGATGCAATGTCCATGTCCGGAGTCTGCTATGGCTATCGATTTTGACTTCGCCAATGAGCGCATTGTGTT  
CTTTTCGAACCTAGGCAGTGGGTATTTCCGCTGTCGGGGCCAAATGTGGTGGTGTGTAAATGGAGTTGGTCTGATTCATACTGGATCAGTGTTCACA

CCTACCACAACCAGTCAAACCAATCTCGACCTATTCCCCGAGTGTGTAGGTACTGGGACGAGATTGTTTCTTTTCATTTGACCGAATTCTGCCAACCC  
ACGTTGGGTTATTGGACGTCGGATTTTACCTGCAACCTGACAAAGACGAACGGTTGCAGAGGGCTCAGATTGCGCTGGATGCACATAATGATCCTG  
TTGAGCCTTTCAGCAGGGACATTGCCGTGTTTCATGCGTTTGAGGCGATCAGACAAACGGCCCAAGCGGTCGATATAACTGTCATGAAGATTGAACA  
TTTGATCATCATGGCGTGCATATATCGTTTCGAAAATGGCGTGCCCTACAGCAGGCACTTCAATGATTGTCCAGTTCGATTTGTCAAACCAAAGAGTGA  
GGTTCGGCGTTGCAAGAGGAACCCATCCGGAGTTGGATGGCAGAATGTGGTGGTATCTGCACGACGATTGCATGATCCACACTGGTAGGCCGAAA  
AGCCTCACTCCGGTGAGGTTGGAACCTCCGTTGCCTGTCAGCAGTCGGTTTTCTTTTCGTGCAACTCATCGTCAGGCCAAGGTAATGGCTAACGATTT  
TGAAGAGAAGTGGAGAGAAGACTCTAAATGTAGGGCACGGACATGGCACATTGAAGGTGATGATACACCGAGGCAAAAGCTTGCTCGGTCCCATC  
ACCCTTTGTGGTGTCCGAATACGTTTCGACGAACGGTTTCGACGAGATCTTCGTTGCCGCGTACATTTGGTTTTCTTTCAACTCATTTGCACGTTCTAC  
TTCTCGTTCTCTCGGCCTAATCTTCGGCGAAAACCTGACAGACACACGGAAGGGGGAGAGCATCCTCTTGAGATGAGGATTTTTCTGCATCATCTT  
CCTTACTCGTGTGTAAGTTAGGAACCAGAGGTGATCAAGTCCCTGTCGACTATTACGCGAACGTGGCGGCACACTATGGTGTCCGCACACATTCTCA  
CGTATACAAAGATGTGACGACAGATGATCTTGAAAAGATGAAAGTCGGAGACTTTTCATCTAGTTCCGCTGGTTATTTGAATCTCGCATACGTTCTC  
AACTTGTTTACAAGAGAGTTTTACCCCGCACGTGGAGGTGGAGAGATCTCAAGGTGTGAGTTACACCTTGTCACCAAGTTCAAAGTGGGTAGAA  
GCAACGAGATTTCATCGCTGATTGGTCGAGGGTTTCCTGGTCCAACCTTTCTCCCCGCGTGGATAGCCACGAGGGTTACCGCTGTGTACGTACCAACTT  
TCAGAATTGGTGCCTTATCAGGAAGTGACATCCCGCGTTCTCATGACGGGTGAACTTGCTGGAGAAAGTTAAGAACACAGCAAAGTTCGATGAGG  
GTTGGACATCTGGCAGCTCATCAGTTTCAGTAATCCCTGACGAGATCAAGTTAAGATGCCCCGAAGTACCATCGGGTAACCATCTTGAAATATTAAAG  
GATTACAAAACGGTGACATTCATGGTGGAGCCGGTACTGTGCAAACCTGCCATTGCTTGCGGCGCACGACCGGTCATCCACGACAAGACACTCGAT  
AGAGTGTATCATAAGATGCCTGGGCCAGAGGATTTCAAACAACCTTCTATTGGGAAGTTCATGGGTTGGTTGGTATCTGCCGGTTTTAAAGTTAATGC  
ACCAATAGAGGTAAGAGCTTGGTGGTTGTTACAATGGTATTGGTCGCAAAAGTGGAACCTATGCGTACGACGCATTAGTTACACTTGCTAAAGCTTAC  
ACCATATCATCGTATGTGTACAATCATTGGGAGCTTTTCCTCATTCTTTCTTCACCGTTCCGGCAGTGGTCTGGAGAATGTTGTTTTCTTCCAAATCAT  
TGTTCTCCATAGTCAAAATTTGTGCGCTTGGTTTTTGGCGCTACCTGTGTTGTGCTTGTTAGATTCGAAAGTCACTTTCGTGGCAGGAATCTGGTCA  
ATGCAAAACTTGTGGATGGGCGCGGCGCAAGATTTGTCTGCACTCATGGAGACACGATCTTCACTGGTTTGGGAGCCAGTGCAAAAGATCGTAGGA  
ACGAAGAAGTTGACGTTCCCTTTTCCCCTTGGGCATTGGAGCATGAAAGATAACCAAACCTGGTAAGATTTACGAAGGTAGATTTGTTGGTCCCTCCG  
AGACTATCGGAGGGAACTTTCGCCTTGTGAGCACTACTCGTGAATACAAGCGTGGATTAAAGTCTTTTCTGCTCCTTTTAATGTTGGTCATGCGGAG  
TCTCTTGTGAAGGCTCAACACGTAGCACCGTACTCATCTTACATAATTGTGTGACTATGATGGTGCAACTTTGTGCCAAGAGATCGACTGCATGGAC  
AGCATGTATGGTATGGTTGGTGCCTTAACGGGACTTGCCCTGGCGCCGCCGAAGTTGCTCAAGGACATTCTTTCTTTTCTTTTCCCTGGCAAGGATT  
TTGCCAGTACTCCTTTTTATCGATCGCTTGGCTTTGCCGCGTCGTTAGAAAACATCCCGTTTGAGATAGAAGGGATGGTCGAAACGACAGAGCCAAT



GCCAGAGACAGCTACACCTGAACCAACAGATCTGGCGGATCCAGATTCTTTCAATATGTTGGTCGATGAGATAGCGTTCATCCAGGCATGCGTGGAA  
CAACTCAAGATACCTACCTTGGATAAGGAGGCATTTGATGAGGTTTCACAGCGAACTTTAGAAAAGGAGTTGGACAAGGTCGAAATCCCTGAGGAT  
TCGTTAATCAGGGTTTCCAACATTCCTCCAAGAGTGCATCATGAGTGGGCGCAATTGGTGGATGGTCTCCACCATGCTATTTCTTTCTGTTTCGTACGAA  
TCGCGTCGCTGACGCGTTTGTGTTGTACGTAAAGAATGCTGGTGAAAATATATATGACTTTGTCCAGCCGATACTGGAAATTCTTTCCTTCTTTCTGCA  
CCTTGCAGCTGAGCATTCCAAGCATGCGTTTGATCGCTTGTTTCAGATGGCTTTGCGGTTTCTTGGACCATGTGTGGGGTCTAGAAGCGTCAAAGAGA  
GTCAAACAGTGTGGGGCCTGACTGGCCTTCATCGAACGGGATTGCTTGGTGTAAGCCAACTTGCAGCTAATGTTGCTTATTCTGATTTTCGTAG  
GTAGACAGGATTTCGAATCAGATTACAACAAGTTGGTGCAAGAAGGCAAGCACCTTGCTCAGGTGTATGGTGCCGTAAACGATCAAACCTTGGAG  
GGCCTCAGAGGAGGCCTATAGGTTATGGAAAACCTCTAATGTCGCAATCTGAAGCCAGTCTGCTCGGTTTCGAGTCAGGTGAGTTTGTGACTGATCG  
TGAGTATGAGGCTCGTGTGCAATCGTACCTTGAACAGGGTGTTGCACAAGGTGCTGACGGGGTGTTTTTGGCCGATAAGAGACCGGAGCTGATTGC  
TAAGTCACAGCACCGTTATGAGCCAAAGTATCCCGCACTCACTTCTGAGGATCGTTCCATGGCTAAGGAAATAGCCCAGGCCATGTTTGATCAATATC  
CGGAAGTCTTCGCTAATTGTGATGTTTTGCCGCCGAGGGCAGTTCACAATTATGTGAAGCAAAAATATTCTCCAGGAACCCCGTTCATCAAACCTGG  
GGGCTTCAAATCTCGTCAAGCGATGTTTCGACGCTGGTTATGACCGCGTCATGCAACGACGAGCAATGCATTACTTGAAAACCTGGTGAATATCCAGTG  
CAGTTCTATCACGCTTTTGTGAAATCACAGGTGGTAGATATCAATAAATGCTTGAGCCCCGAGGAAGGTGGAAAAGGGAAAGATGTTTCGCACTGTG  
GTCAGCCAAGATCTGTTCTCCTATTACATTGACCAATGTCTCCAAATTGAGCGCAACAAGCGCATAAACTGGGATACATATGGTGCAGGTATAGGTAT  
GCCTCTTAATCAGTCGATGGAGGCAATATACAGTAGAATGGCAGCTGCACAGAAATCGAGAGGAGGCAGGTACATCATTGCTGATGCAACCGCCTTC  
GACTCATTTTGCAAACCTTTTCTCTTTGAAGTGAACGCAAATCTTTGGGAACTCGGCTACAAAGATCATCCAAGCGGCAACGGCAAGAACCTCGCAT  
CTGTTCTAAATGCGTCGTATCAAGCCAGACAAAATGCGTGATAATCGGTGTGACCGAGCCGGAATATGACTCGTTGACTGTTTGCGTCCAAGACAA  
AAACAGTCGCGAGCTCATAACGGCAACGATCCCCAAAGACAGTAATCTGCTTGGAAGATCTCATAGACTGGGACAAGTACAATAGATTGCCTGCTGA  
G

> Cb\_clean\_k141\_5852

ACCGAGCCGGAATATGACTCGTTGACTGTTTGCGTCCAAGACAAAACAGTCGCGAGCTCATAACGGCAACGATCCCCAAAGACAGTAATCTGCTTG  
GAAGATCTCATAGACTGGGACAAGTACAATAGATTGCCTGCTGAGCAACGTTTCAACTACGTTGCAAACTTCAACCACCTGAAGGGAAGACGGTG  
GTAACCTGGGATCCTTCTCTCCGCCATCCAGATCAAACCTGGATGGGTAAATATGAATATGGTGTCTTATCTGATGTTGACAAGAAGTTCTTTGAACAT  
CAGACTTTACCTACGATCCTTCGAATTTGAAGACATGTATCAAGACATATTATCAGTTTCACGATCAAACCTATAAACTGATGTCAAACGTACATGCG  
AAGAATCGTGGTGGAAGCACTGGAGGGTCAGATACATCAAACGTTAACACACACGCCTTCAAGGCAGGTGTGATTTACGCTTGGTGTGAGACTACT

GGCAGGGCTCCAAAGGAGTTCTTCCAATACAATGACCTTGCCAATACATCAGATGACACCATCTGGCAATCGGGTGGCAAACATGGCCTAAACACTG  
TAGAAGATGTCGAAGTGTTTCGACATCATTGTCAATCAGTGGGCATTCATCTAGAGATAGAGACAACGAAGGACATATCACAAGTGAATACTTGTC  
AAAATTCGTTTCGTGTCCCTACTGCAGAAGATTGAGCAGCATTGAAAGTCTGGAGATCCCAGAAAATCAAGGCTGCTTCAAATGCCCATAAACAATTA  
GGCCTGACTGTTCCCAATTCTTGGGAGCAGTTCAACAACCCGCAATTTGTCGTCGTTCAAACCCGCTGTCGATCTTGCTCCGAAGGTCTGCGTTTA  
GGTATTACCAATCAAACGCAAATCATTGGAAATACGTTTTAGTGGAAAGAGGTGCTGGTTCATGCTCAGAGCACCGCCTTTCTACCTGAATTGTATGG  
CAAGTTCGCACAAGAGTGGTGGGACGACATCAACGATCTTCTGGTACAACAGAAGATCCATCGGAAGTTCAAGGTCACAAACGGCCAATTTGGACT  
ACAGTGGTTCGAACAGGTGGACCCGAGAGCGTCGCAACAACAGCTCTCACCACGTCAAGTCGCTTTCTCTCATGGCTGAGAGGAAATATGTTCCC  
TAGTTACTACAGGGTACTTGACATCCACATGAACGTCGCAAAAGTAGATCCAGAACGACACGCCAAGTTCCTTCGTAAGCTTGAGAAAGGTGGCG  
AGGTTGGGAAGAACTGTTACGTGAAGGGGTAGATAACCTCTACGCCTTAACTGATTCCATCCCAGATGAAATCAGCAAAAAGTTCCAACCCGCGCT  
CGACATGCTCTATGCAGAGCAACCATTCTACACGAAGAACAAGGTCGTTGAAAAGTTCGTTTACTTGAACTTCTGGAAGAAAGCCCAGAGACAGA  
GGTCACATTTTCAGACTTTTCCGCTCGGATTCAAGAGTCACCGTATGCGTCGGTGTGCGACCCCTATCACTTCTGGGAGAAGTTAGGGGAGCCTGAG  
TTCAAAGAACAGTTGATGGCTGAAGATCCTCTGAAGATACAAGGTCTCGTTTTGCTTATAAGCACCATGTACCTATTAACAAACACGGCTGAGTCAG  
TAGTGTGGCCATTCCTTTTGTGGTCTATTCTACAACTCTTCCTGTGGTCCTTTATCGGACTCAATAAGGTATATGGACTGTTGAACACTATGTACTG  
GCATTCCGAAGGTAAGTCTTCGAGGGAGATATCCCGAATTATGCCTCGAGATCCGTACATGGTGACGAAACAGTTCGCTGCGTTTTGCATCGACTTTC  
TACCATCACAACCTGGGTACTTGGCCCTTATCCCATTGCACATATTGTCCTTACTTCCAGTGCTGTTTGAAGCACTTGGAAGAGCATGGTATGTGGCA  
GGGGAGGTCAAGAATGTGATGGAACCCCTGGCAGCACCGTAAACAAGTGGGATCAATACGCAGACGAGTACATACAAGCTCTGCGTTCGTCTCCC  
ACGAACAGAAAATACGTTGCTGCCAAGACTTCAACTGGCAAATCGACCTGGTTTATAGCTGCCCTGTGGAAAGCTAGACACCGCCAGAAGGTCAGG  
AAATTTTGGCTTGTCGAACCTCGATTGGTGTGCGCGACAATACGCATGTACCATTGATGCACCTTATCAAGTGCTCAAGGACAACATCCAAGTTTC  
AAACACCCACGATATCCACATCTTGACGTATGGACATTTACAGTCAAGATTGTTGGATATAGATAATGAACGTGATATCGTCATTTTTGACGAATTTCA  
CGAACAACAAGGTGAAATGATTCTTGGGCTTGACAAGTGCAAGGCGCCAATCTTTCTCTCGGCCACGCCAGCCGAAATACCATCTCTGCACGG  
TTCCGGAACCTCTGGTTCCAAACATTGACAGACGACATCCAATCCAGATCCACCAAGTGGATGACGGAATGGGTGTTGTTGACATGTTTCATGGAAGCC  
AGAAACCGTTACCCTGATTTATGCAAGAGAGCGATGATCATTGTACCAACTCACAAGGAGGTTGCAAAAGTTATCGCTTCCCTTGATTATCTCAAGGT  
AGGTAAGGTGTCCCTCTGTCCGCACGTGATCGTGTGGTACAGGAGGAGGGAATACTGGTGTGCACCCCTTACGTCCAAACGGGTCTGGATATAAA  
ACCACCACCAGATCTTCTGATCGATTGTGGCAAAGACTTCGTTTTGGATAAAGGGCGTCCAGTATTTCCACTCCCGTGGACAGATAAGGACATAAAC  
CAGCAGAGAGTTGGTTCGTGTTGGAAGATTAAGACCTGGAATCGTCTTTCAACCGAAATCAGCAGGTTCCGGAAGGAAAGGTGTGGTTTACCCGAG  
CCCACATCTATTCCAACATAAAGCTGTCGCGGAACATTTAAGGTTCCACAGCTTGACCAATCTCGGGTGCTTTCACGGCAGATTTGCCTTTCTTGC

GACCGAACAAAGAAAGTGTTAAATTCTCTACCCGTCGAAAAGTCAGTTGTTTTTATACATTCACTTGCTTTAAGTGGTGTTCGCCAGGAGCAATGGCA  
ACACATGTATACGAGATCCGTGCAGGGGCACACTCTCGGCAACGACTACAAAAACGTAGACAGACTGCTTAATCATTCAAGGTACAAACGATCAAA  
GCTAGTCTCGTATGGAGACGCACTTTATCATCTTTACCGAGAACATGCAGTCCAGTACGGATTTGTCAAGGAAGACGGAAGTACAGAATACAAGTCT  
GCCAGGCCAATGTCGGTCAATCAATGGAAAGTGGATAGAGTTAGAACAATCGCCGACGACTAAGATTGATATTCAAGAGTTACCACAACAGGAACTTT  
CAAACAAATATCAATCTTTTGAATCATCAATGAGGCGATGTCGAGACTCCATTATTTTCAAAGCCAAGGACATGCCTGGGCATGACTTGGAACGTCTC  
AACTCCATCTTAGCGTTTTGAGCACTAAAAGGCGGCACTTGTAAGCTGAAATGCTACATTTAAAGACAACCGCAGTTTTGTGTTACCCAATTGACGTTT  
GACTTTTGTGACACGCTATTTCTGTTGTTGCCTCCCGACCTCTTTCGTGACATTTGTACATCCGTTTCGTTACCTTTCTTTCTTTGTCCGTAAAACT  
ACAAACAAACGCAGCGGTTAATGCCGCGGTAATAAACCGGATTCACATGCTAACGCATGGTGTGGTTGGCCGTTTGCCAACGTAATCACTAGGGTGG  
TTAATTCCACCCTATGAGAAGGGGAAAAAAAAAAGAAAGGTAACGAACGGATGTGACAAATGTCACGAAAGAGGTCGGGAGGCAACAACAGAAATA  
GCGTG

> Cb\_clean\_k141\_14799

CAGACTACTGGCAGGGCTCCAAAGGAGTTCTTCCAATACAATGACCTTGCCAATACATCAGATGACACCATCTGGCAATCGGGTGGCAAACATGGCC  
TAAACACTGTAGAAGATGTCGAAGTGTTTCGACATCATTGTCAGTCAGTGGGAATTCATCTAGAGATAGAGACAACGAAAAACATCTCACAAGTAG  
AGTACTTGTGCAAAATTCGTTTCGCGTCCCTACTGCAGAAGATTCAGCAGCATTGAAAGTCTGGAGATCCCAGAAAATCAAGGCTGCTTCAAATGCCCA  
TAAACAACCTAGGCCTAACTGTTCTACTTCATGGGAACAGTTCAACAACCCGCAATTCGTTGTCGTTCAAAACCCCTTCGCGATCTTGCTCCGAAGA  
TCTGCGTTTAGATATTATCAATCTAACGCAAACCATTGGAAGTATGTCTCAGTAGAAAGAGGTGCCGGTCATGCTCAAAGCACCGCCTTTCTACCTGA  
ATTATATGGCAAGTTCGCACAAGAATGGTGCAGACGACATCAACGATCTTCTGGTGCAACAGAAGATCCATCGGAAGTTTAAGGTCACAAACGGTCA  
GTTTGGACTACAATGCGTCGAACAAGTGGATCCGAGAGCGTCGCAACAACAGCTCTCACCACGTCAAGTCGCTTTCCTCTCATGGTTGAGAGGAAA  
TATGTTCCCTAGTTACTACAGGGTACTTGACATCCACATGAACGTCGCAAAAGTAGATCCAGAACGACACGCCAAGTTTCTTCGTAAACTTGAGAAA  
GGTTGGCGAGGTGTTGGAAGAAGTGTACGTGAAGGGGTAGACAACCTCTACGCCTTAACTGATTCCATTCCAGATGAAATCAGCAAAAAGTTCCAA  
CCCGGCCTCGATATGCTCTATGCGGAGCAACCGTTCTACACGAAGAACAAGGTAGTCGAAAAGTTTGTTTACCTGAACTTCTGGAGGAAAGCCCG  
GAGACAGAGGTCACATTTTCAGATTTTCTGCTCGAATTCAGGAATCACCGTACGCGTCGGTGTGTGACCCCTATCACTTCTGGGAGAAGTTAGGGG  
AACCGGAATTCAAAGAACAGTTAATGACTGAGGATCCTCTGAAAATACAAGGTCTCGTCTTGCTCATTAGCACCATGTACCTGTTAACGAACACAGC  
TGAGTCAGTGGTGTGGCCATTCTTTTATTGGCCTGTTCTACAAACTCTTTCTGTGGTCCTTTATTGGACTCAACAAGGTGTATGGACTGTTGAACA  
CGATGTACTGGCATTCCGAGGGTAAATCTTCGAGAGAGATATCTCGAATCATGCCTCGAGACCCGTACATGGTGACAAAACAGTTTGCTGCATTTGCTG

ATCGACTTTGTACCATCACAACCTGGGTTACTTGGCCCTTATCCCACTGCACATATTGTCCTTACTTCCAGTGCTTTTCGAGGCACTTGGAAAAGCGTG  
GTATGTAGCAGGGGAGGTCAAGAATGTGATGGAACCTCCTGGCAGCACCGTAAACAAGTGGGACCAGTACGCAGACGAGTACATACAAGCTCTGC  
GTTTCGTCTCCCACAAGCAGAAAATACGTTGCTGCCAAGACTTCAACTGGCAAATCGACCTGGTTTATAGCTGCCCTGTGGAAAGCTAGACACCGCC  
AGAAGGTCAGGAAATTTTGGCTTGTCTGAACCTCGATTGGTGTGTCGCGACAACACACATATACCATTTCGACGCACCCTATCAAGTACTCAAGGACAA  
CATCCAAGTTTCAAACATCCACGATATCCACATATTGACGTATGGACATTTACAGTCAAGGTTGTTGGATATAGATAATGAGCGTGATATCGTCATTTTT  
GACGAATTTACGAACAACAAGGTGAAATGATTCTTGGGCTTGACAAGTGCAAAGCGCCAATCTTTCTTCTC

> Cb\_clean\_contig\_2265

CCTTGCCTGAAACCTAACTTATTCCACCAGTTAACAAACGGTTTCAGGGTCTGCGCCAAGTTCTCCGGGCTCAGCGTTTTTGAGCGCGGGCTCGACT  
TTACACGCCCTGATCCTCGGGTCGAAGGCGGCTTCATCACAACCAGACAGGAGAGGTTGTTTTGGGACGTAGGGGCAAGCAGGTTGGTGTTACAC  
CAAAAGGCCTGGCAAAGATATTCTTCCGCAAGCACAAACCAAGAAAAATGGAGGATAGCTTTGGCTGCTGCGATTGGTTTGACCTATGACGAAGGTC  
TGCTTTTCTTTTCAAAGTTTCACAATGATAACACGAAACCAGATGTTGTGTTGGAGACTTTGGGTTTCGTACCCCTATCACAAGCCAGATAGGGAAAC  
AGTGACAAGAGTGGCTTTTGTGACGTGGAGAAACCTGTCGCACCCAACACTACGCCTCAGTCTTCCACAGTTGTTCCGCCTCCGCCGCCTCCACC  
GCCGGTGCAGGAAGTCAAGCAAAAGAGGAAGAAGACAGAGTTAGCTGACGGTGACACGTGGCTTCTTGCTGAAGGTTCTGAAGGCAAGTCAAAC  
AGAGCTCGTTTTAGATCTCTCTTCCCACATGATTGGTGGTTGAGAGTGTCTGAGAGGGTTATGCCTTTCATGAATCAGGATGCATCTCGTGACGTGCG  
GTACAGATCCAGATCCTGGTCTCAATCTTCCCTGGTTTCAAATCCTTCAGAGAAGTTTGATATAAACACGGTGAAGTACACACCTTCTAGTTCTTCCA  
AGGCATCAGGTTCAACACCTTTGCGGGTTGATCCTGAAGCTTTCAAGAGACAGCTTCAGGCTAAAGCTAAGAAAGTGAGTGCAACGTCGTCCTCCC  
GTCCCGATGCGAGGGAAGTGTATCTGAAGGGTGTGCGGTGAGTTCAAACCAGACAAGGTTTCTCACAGAAAAGCCCTTTCTGAACCTACTCCGTCGA  
GGAAACCTTCCTCTGAGTGGATGTCTATATCTCGAGCATCATCTGATTATCTGTTTCGATGATGATCATGAAGACGCAAGAGATTCGACTAAATCAGAC  
ATTGAGACCAACCCTGGACCTTCAATCAGGCATTTCCGTTCCAAATCGACTTCACATTTGGAGGGTGAAACACCGTCTCTAAATTTTACACCACCTAC  
CCCTGGTGTGTTGACTGTGCACCACCCGACACCACCTCGTTTGAGGGTCAATCACAGGATGAATAGACACACTGTGATTGTACCTTCACCGGGT  
GAAAACACGTCGAACTGGAATGTAGGTTACTCGTCATTTGCATGGCCTCCAACAGAGGAACATCTGGAACCTCGAGACTCCAGAACCGCGGATATA  
GAAGAAAATCCCGGACCATGTGAAACCTTGACCCACTTTGCCTCAGTTTCGAGGTCGGAGTGGTTCTCAGAGTTCAGTTGCCGCTGTCACTTCG  
GAGCGATCACCTTCAAGAACACGTAAGTTTCTTGGAAGATCGGCATCCATGGCAAAGCGCAACGGAAGAAGTTAAGGACATTTTTGGATTTAAA  
GAACATGATGAGGTGTATCCGTACACTGGTAAAACTCATCTTTGTTGAAAAGCATTATGAATTCCACTATGTTCTTTCTCATTTACCTAAAGACAAG  
AAGTGGCGTTCATCAACCTTTATCAGGTGGGTTGCCGCTGCTTCTTTGTCCGAGCTTCAAAAATCACTTGACTGTGTCGTTAAGGCTTCCCACCTTT

CAACACCGCGCTAGTGAGTAAGTTGCGTGATGAGACAAACTCCTTCTTCCAGAAGATCTCTGATTCTGAGCCAGTAGGCGGTACAACCATGTCTGCC  
TTAGCTCACACGTTCAAGACCCTATACGCCTGTCCAAACAATGGATGCGGTTATGCACTGGAGGTGAAACCGGAAGATGGAATTGTACTGTTCCATC  
TGACAGAGTCCCCAGACGAAATCGCCAAGAATAGGTTGTGGTGGGTCTTGAATGGGAATGAGATTTTGCACGGAGGGGACAAGGCTCCTGCCTCTC  
CAAGCACAATCTCATTTCGGTTGGCTGGCAAAGGAGTATTCAACACATGAGGTGATAATTGAGCCCAAACCGGACTCTGTGTTATCACAAGAGAAGC  
CAGGGCCGTTTCGCGATGCCCTCACTTTCTCAGTTTCAGAAATGTGTTGACAGGATTATTCCTACTGGTGGTCATTTCTCCCGTTCTGAGGTGACGAT  
CTCAAAAATCACATCAACCAATACCTGGAGTCTACAGATGTCAAGATAGTAGATCCAGTGTTGGTTGCAGCGATGGCAATGAGCTTCAAGTCAAAGT  
TCAATTGTCCAAAAGATGTCAGCTCTTTCGCAATTGATTTTAGACTTGACCGGAGGATGGTTGTTTTCTGCGCCACAGATTCCCCTGAAGACAAAAA  
TAAGGGGAAGCTTTATTGGTGCATTGGTGGTAGTGTCATTGTCCATGGCGGGCTGCTAGGTATCGAAGATGGGAAGTCTTGTTCCCTTCACTGGATC  
ACTATAGCAAGTTGTGGACGATGCCGCTTCCAAAATCGGGTTGGGTGGACAGGTCATTTCGACGCTGAATACTTCACAAAGATCTCAACCTGGCAAA  
AGGCCCTCGACCGGTGTGAACCGATCGTTGTATTCTCTGAACACACATTGCAACGCACACTTTACCAATACTTTGATGGTGTCACTGACAAGGTGTT  
ATCACCATCACATACTGCAATCGTTGCTTGTGTGGTAAAATCCCTGATGAAATGCCCTGAGAGCGGGGTAGGTTATGCTGTACAGTTCGATAGTCATG  
GGGCTTCGTTGTATGTGTGTCGACAACCGAACTCCGCAGAGGTGGACCGGTTGTGGTACTTTCACTGGGATTTTCCTTTCGTGCATGGGGGAAGAA  
AATCTTATGCTCCGGAACCCAGGCAGTTCTTCTACACTGAGCATCTAAACATAGATTATTCGATACCCATGCGCGAAGTTTTTGTGTTGGGAAGGTCTG  
CCCAAATCCAATTCCTCACATTTGACTTTCAGGAGTCAACAGGAATTGTTTTTCGGTTTCCAGCAGCAAATAGATTTGTATGATGTGCCGACACCGGC  
ATTCATGCATTTCGAGAGCACATGGTGTGGCTGAACAAGCCATTTCGTGACACAATACCCAAAATGAGAACTCTCCAGTTCAATTTTGAGCAAGTTGCC  
GCGATAGCCATGTGTTATAGATCAAGGATGCAATGCCCATGTCCGGAGTCAGCCATGGCTGTTGACTTTGACTTCGCCAATGAGCGCATTGTGTTCTT  
TTCGAACTTAGGCAGTGGAAGTTTCCGCTGCCGAGGTCAAATGTGGTGGTGTATAAATGGAGTCCGACTAGTGCACACTGGTTCTACATTCCACACC  
TATCACAAACCAGTCCAACCAATTCGACCCGGTGCCCGAGTATGTAGGTACTGGGACGAGATTGTTTCTTTTACTTGACTGAGTTCTGCCAACCTAC  
GTTGGATTATTGGACATCGGATTTCCATTTGCAGCTTGACAAAGACGAGCAGCTACAGAGGGCTCAGATTGCATTGGATGCGCATAGTGACCCTGTT  
GAGCCTTTCAGCAGGGACATTGCCATATTCATGCATTTGAATCAATCAGACAAACAGCCCAAGCGGTCGATATAACTGTCATGAAGATTGAACATTT  
GGTCATCATGGCATGCATATATCGTTTCGAAAATGGCATGCCCTACTGTAGGCACCTCAATGATTGTCAAGTTCGATTTGTCAAATCAGAGAGTGAGGT  
TTGGCGTTGCAAGAGGAACGTATCCTGAGTCAGATGGCAGGATGTGGTGGTATCTGCACGATGATTGCATGATCCACACGGGTAGGCCGAAAAGC  
TTCACACCGCTGGGGTGGAAGCGCGTTGCCTGTCAGCAGTCGATTTTCCTTTCGTGCAACTCACCGTCAGGCCTGTGAAATGGCCGACGGTTTTG  
AGAAAATTTGGAGAAAAGACCAAAGATCCGTTTGCAAAGACAAGGGTGAAAACCACAATCATCATCCCCTTTTCTGCGGATCAACTTTTGACGAGA  
GGCACGATGAGGTATTCGTGTCCGCTTACATATGGTTCTACATCCAACCTCATTTGCACGTTTTATTTCTCCTTTTCCCGGCCTAATCTGCGGCGAAGAC  
CTGACGGTCACACAGAAGGGGGAGAGTATCCCGTTGCGGATGAGAGTTTTTCAGCCTCATCTTCCCTCCTAGTGTGCAAGTTAGGGACTAGAGGTG

ACCAAGTTCCTGTTGATTATTACGCGAACGTGGCGGCACACTATGGTGTCCGTACACATTCCCATGTGTATAAAGACGTAACAACAGACGATCTTGAA  
AAGATGAAAGTCGGAGACTTTTTCATCTAGTTCCGCTGGTTACCTGAATCTTGCGTATGCTTCTCAACTTGGTTACAAGAGACTGTTCACTCCGCATGT  
GGAGGTGGAAGGTCTCAAGGTGTAAGTTATACTTTATCACCAAGCTCAAAGTGGGTGGAAGCAACAAGGTTTCATTGCCGATTGGTTCGAAGGTTTC  
CTGGTCCAACCTTTCTCCCTGCGTGGATAGCCACGAGGGTCACTGCTGTGTATGTGCCAACTTTTCAGAATTGGTTCGCTGTCCGGAAGCGACATCCCG  
CGTTCTCACGATGGGTAAACTTATTGGAGAAAGTAAAAACACAGCAGAGTATGAGGAAGGTTGGACATCCGGCAGCTCGTCAGTTTCAGTGATC  
CCTGACGAGATCAAGTCGAGATGCCCCGAAATACCATCGGGTAATCATCTTGAAATATTGAAGGATTACAAAACGGTGCACATCCACGGGGGGGCCG  
GCACTGTGCAGACCGCCATTGCCTGCGGTGCACGACCGGTTATCCACGACAAGACACTCGATAGAGTGTATCATAGGATGCCTGAACCAAAGGATTT  
CAAACAACCCTCCATTGGCAAGTTTATGGGTGGTTGGTGTCTGCTGGTTTCAAAGTTGACGCGCCAATTGAGGTGAGAGCATGGTGGTTGTTACAA  
TGGTATTGGTCCCAAAAATGGAACATATGCGTACGACGCATTAGTTACACTTGCGAAAGCCTATACTATATGTTTCATATGTATATAACCATTGGGAACCTT  
TCCTCATCTTTTCTTTACCGTTCCAGCAGTGATCTGGAGGATGCTTTTCTCTTCCAAGTCATTGTTTCGCCATAGTCAAAATCTGTGCGCTTGGTTTTT  
GGCGCTACCCTGTGTTATGCTTGCTAGATTGCAAAGTCACGTTTGTGGCGGGCATCTGGTCAATGCAAACTTGTGGATGGGCGCAGCGCAAGATTT  
CGCGGCACTTATGGAGACACGTTCCCTCACTGGTTTGGGAGCCAGTGCACAAGATCGTGGAACGAAGAAGCTGACATTCCTTTTTCCCCTTGGGCA  
TTGGAGCATGAAAGACAATCAAACCGGCAAGATCTATGAAGGTAGATTTGTCGGCCCCTCTGAAACGATCGGAGGAAATTTTCGTCTTGTAAGTACC  
ACTCGTGAGTACAAGCACGGATTTAAGTCTTTTCCGGCTCCTTTCAATGTTGGCCACGCGGAGTCACTCGTAAGAGCACAACACGTGGCACCATACT  
CATCTTCACATAATTGTGTGACCATGATGGTGCAACTTTGTGCTAAGAGATCGACTGCATGGACAGCATGCATGATAATGGTTGGTGCTCTGACAGGG  
TTGGCACTGGCACCACCAAAATTGCTCAAGGATGTTCTTTCTTTTCTTTTCTTGGCAAGGATTTTGCCAACACCCCTTTTTATCGCTCGCTTGGCTTC  
GCCGCGTCCCTAGAAAACATCCCGCTCGAAATAGAGGGGATGTTAGAAGCGGCAGAACCAATGCCACAGATAGCTACACCAGAACCAACTAATCTG  
GCCACCCAGATTCTTTCAATATGTTGGTTGATGAAATAGCGTTCATCCAGGCATGCGTGGAACAACCTCAAGATACCCACCTTAGATAAGGAGGCATT  
TGACGAAGTTTCACAGCGGACTTTAGAAAAGGAGCTGGACAAGGTGCAAATCCCTGAAGACTCACTGATCAGGGTATCAAACATACCGCCAAGAG  
TGCACCATGAATGGGCACAACCTGGTAGATGGTCTACACCATGCCATTTCTTTTCGTTTCGCACAAACCGCGTCGCAGACGCGTTTGTGTTATACGTCAA  
AAATGCCGGTGAAAACATATATGACTTTGTCCAGCCAATACTGGAATCCTTTCTTTCTTTCTGACCTTGACGCTGAGCACTCCAAGCATGCGTTTCG  
ATCGTCTGTTCAAATGGCTTTGCGATTTCTTGACACAGTGTGGGGTCTAGAAGCGTCGAAGAGAGTCAAACAGTGTGGGGCCTGACCGGCCTTC  
ATCGAACGGGACTGCTTGGTGTAAGCCAACTTGCAGCTAATGTTGCTTATTCTGATTTTCGTAGGTAGACAAGATTTTGAATCAGATTACAACAA  
GCTGGTGCAAGAAGGCAAGCACCTTGCTCAGGTGTATGGTGCCGTTAAACGATCAAACCTTGAGGGGCCTCAGAGGAGGCCTATAGGTTACGGAAA  
ACCTCTAATGTCACAATCTGAAGCCAGTCTGCTCGGTTTCGGACAGACGAGTTTGTGACTGATCGTGAGTATGAGGATCGTGTGCAGTCATACCTT  
GAACAGGGTGTTGCACAAGGTGCTGACGGGGTATTTTTGGCAGACAAGAGACCGGAGCTGATTGCTAAATCACAGCACCGTTATGAACCAAAGTAT

CCCGCACTCACTTCAGAGGATCGTTCCATGGCCAAGGAGATAGCCCAAGCCATGTTTGATCAATATCCGGAAGTCTTCGCTAATTGTGACGTTTTGCC  
ACCAAGGGCAGTCCACAATTATGTGAAGCAAAAATACTCTCCAGGAACGCCGTTTCATCAAACCTGGGGGCTTCAAATCTCGTCAAGCAATGTTTGA  
CGCCGGTTATGACCGCGTCATGCAACGACGAGCGATGCATTACTTGAAAACCTGGTGAATATCCAGTGCAATTCTATCACGCTTTTGTAATAACACAAG  
TGGTGGATATCAAGAAATGTTTGAGCCCCGAGGAAGGTGGAAAAGGAAAAGATGTTTCGCACGGTGGTCAGCCAAGATCTGTTCTCCTATTACATTG  
ACCAATGTCTCCAAATTGAGCGCAACAAACGCATAAACTGGGATACATATGGTGCAGGTATAGGTATGCCTCTTAATCAGTCGATGGAGGCAATATAC  
GGTAGAATGGCAGCTGCACAGAAATCGAGAGGAGGCAGGTACATCATTGCTGATGCAACCGCCTTCGACTCATTGTTGCAAACCTTTCCCTTTTGAAG  
TAAATGCAAACCTTTGGGAACTCGGCTACAAAGATCATCCAAGCGGTAACGGCAAGAACCTCGCATCTGTTCTAAATGCGTCGTATCAAGCCAGACA  
AAATGCGTGGATAATCGGTGTGACCGAGCCAGAATATGACTCGTTGACTGTTTGCGTCCAAGACAAAAACAGCCGCGAGCTCATACGGCAACGATC  
CCCAAAGACAGTAATCTGCTTAGAAGATCTCATAGACTGGGACAAGTACAACAGATTACCTGCTGAGCAACGTCCAAACTACGTTGCAAAACTTCA  
ACCACCTGAAGGAAAGACGGTGGTAACCTGGGATCCTTCTCTCCGCCATCCAGATCAAACCTGGATGGGCAAATATGAATACGGTGTCTTATCTGAT  
GTCGACAAGAAGTTCTTCGAACATCAGACATTCACATACGATCCTTCAAATTTTGAAGACATGTACCAAGACATATTATCAGTTTCACGATCAAATTA  
CAAACCTGATGTCAAACGTACATACGAAGAATCGTGGTGGAAAGTACTGGAGGGTCAGACACATCAAACGTTAATACACATGCCTTCAAGGCAGGTGT  
AATTTACGCTTGGTGCCAGACCACTGGCAGAGCTCCAAAGGAGTTCTTCCAGTACAATGACCTTGCCAATACATCAGATGACACCATCTGGCAATCG  
GGTGGCAAACACGGCCTTAACACTGTTGAAGACGTGCAAGTCTTTCGGCATCACTGTCAATCAGTGGGCATCCATCTGGAGATAGAAACAACGAAG  
AACATATCACAAGTAGAATACTTGTCAAAATTCGTTTCGCGTCCCGACTGCAGAAGATTGAGCAGCATTGAAAGTCTGGAGATCCCAGAAAATCAAG  
GCTGCTTCAAATGCCCACAAACAGTTAGGCCTAACTGTACCCACTTCGTGGGAACAGTTCAACAACCCACAATTTGTCGTCGTGCAAAACCCGTCT  
GCGATCTTGCTCCGAAGATCTGCGTTTAGATATTACCAATCAAACGCAAACCATTTGGAAGTACGTTTCAGTAGAAAGAGGTGCCGGTCATGCTCAA  
GCACCGCCTTCCTACCTGAACCTATATGGCAAGTTCGCACAAGAGTGGTGGCAGCAGATCAACGATCTTCTGCTCCAACAGAAGATCCACCGAAAGT  
TCAAGGTCACAAACGGTCAATTTGGACTACAATGCGTCGAACAAGTGGATCCAAGAGCGTCACAACAACAGCTCTCACCACGTCAAGTTGCTTTCC  
TCTCATGGTTGAGAGGAAACATGTTCCCTAGCTACTACAGAGTACTTGACATCCACATGAACGTCGAAAAGTAGATCCAGAACGACACGCCAAATT  
CCTTCGTAAACTTGAGAAAGGTTGGCGAGGTTGGGAAGAACTGTTACGTGAAGGAGTAGACAACCTCTACGCCTTAACTGATTCCATTCCAGATGA  
AATCAGCAAAAAGTTCCAACCCGGCCTCGATATGCTCTATGCGGAGCAACCGTTCTACACGAAGAACAAGTGGTCGAAAAGTTTGTTTACCTAAA  
ACTTCTGGAGGAAAGCCCAGAAACAGAGGTCACATTTTCAGATTTCTCTGCTCGAATTCAAGAGTCACCATACGCATCGGTGTGTGACCCCTATCAC  
TTCTGGGAGAAGCTAGGGGAACCTGAATTCAAAGAGCAGCTAATGACTGAAGACCCTCTGAAAATACAAGGTCTCGTCTTGCTTATAAGCACCATG  
TACCTATTGACAAACACAGCTGAGTCAGTGGTGTGGCCATACCTTTTGTTGGCCTATTCTACAACTCTTCCTGTGGTCCCTTATCGGACTCAATAAG  
GTATATGGACTGTTGAACACCATGTACTGGCATTCCGAAGGTAAATCGTCGAGAGAAATATCTCGGATAATGCCTCGGGACCCGTACATGGTGACAA

AACAGTTTGCTGCGTTCTGCATCGACTTTGTACCATCACAACCTGGGTTACTTGGCCCTTATCCCGCTACACATATTATCCTTACTTCCAGTGCTGTTCG  
AAGCACTTGGAAGCATGGTATGTGGCAGGAGAGGTCAAGAATGTGATGGAACCCCTGGCAGCACCGTAAACAAGTGGGACCAGTACGCAGAT  
GAGTACATACAAGCTCTGCGTTCGTCTCCACGAACAGAAAATACGTTGCTGCCAAGACATCAACTGGCAAATCGACCTGGTTTATAGCTGCCCTTT  
GGAAAGCTAGACA

> Cb\_clean\_contig\_2381

TTGTTGACATGTTTATGGAAGCCAGAAACCGTTACCCTGATTTATGCAAGAGAGCAATGATCATTGTACCCACTCATAAGGAGGTTGCAAAAGTCATA  
GCTTCTCTTGACTACCTCAAGGTAGGCAAAGTGTCCCCTCTGTCCGCGCGTGACCGCGTGGTACAAGAAGAGGGAATTCTGGTGTGCACACCTTAT  
GTCCAAACAGGTCTAGATATAAAACCACCACCTGATCTTTTGATCGATTGTGGCAAAGACTTTGTTTTGGATAAAGGACGTCCAGTTTTCCCACTTCC  
ATGGACAGATAAGGACATAAACCAGCAGAGAGTTGGTCGTGTCGGAAGATTAAGACCCGGAATCGTCTTCCAACCGAAATCAGCAGGTTCCGGAA  
AGAAAGGTGTGGTTTACCCGAGTCCACACCTGTTCCAACATAAAGCTGTGCGGAACATTTCAAGGTTCCACAGCTAGCACCAATCTCGGGTGCTTT  
CACGGCAGACTTGCCTTTCTTACGACCGAACAAGAAAGTACTAAATTCTTTACCCGTCGAAAAGTCAGTTGTTTTCATACACTCACTTGCTTTAAGT  
GGTGTTCGCCAAGAACAATGGCAACACATGTATACGAGATCCGTGCAAGGGCACACTCTCGGCAACGACTACAAAAACGTAGACAGACTGCTCAAT  
CATTCAAGGTACAAGCGATCAAAGCTAGTCTCCTATGGAGACGCGCTTTATCATCTCTACCGAGAACACGCAGTCCAGTACGGATTTGTCAAAGAAG  
ACGGAAGCACAGAGTACAAATCTGTCAAGCCAATGTCGGTCATCAACGGAAGTGGATAGAGTTAGAACAATCGCCGACGACTAAGATTGATGTTT  
AAGAGTTGCCGCAACAGGAACTTTCAAACAAATATCAATCTTTCGAATCATCAATAAGGCGATGTCGAGACTCCATTCTTTTCAAAGCCAAGGACAT  
GCCTGGGCATGACTTGGAACGTCTCAACTCCATCTTAGCGTTTTGAGCACTAAAAGGCGGCACCTTGTAGCTGAGATGCTACATTTAAAGACAACCGC  
AGTTTTGTGTTACCCAATTGACGTTTGACTTTTGTTCAGACACGCTATTTCTGTTGTTGCCTCCCGACCTCTTTCGTGACATT

> Cb\_clean\_k141\_1313

CAAGAAGACCGACGGTGTCTCGGCGACGTGCGCCCCACTGTCCTCGCAGTCATGGGTCTCGACCAGCCCAAGGAGATGACCGGCACGCAGGCGC  
ATTTGAGTGCTTTGGCGTATATGAGTGATTTCGTACTTCATCGGAACCGTGCAGAGATGGTATTTTCGGCTGGCGTGGCCGAGAGAAGAAAGATCGGCG  
CCTTGCACTTGTCAAGCCCAAGAATCATTTACCTTGTTGTTTCGTGGAACCTCGTCAAAAATGACGATATCACGTTTCGTTGTCTATATCCAACAACCTT  
GATTGTAAATGTCCATACGTCAAGATGTGGATATCGTGGGTGTTTGAGACTTGGAATGTTGTCCTTGAGCACTTGATAAGGTGCGTCGAATGGTATGTG  
CGTATTGTCGCGCAATACCAATCGAGG



> Cb\_clean\_k141\_49228

GACAAGATTTCTGAATCAGACTACAACAAGTTGGTGCAAGAGGGCAAACACCTTGCTCAGGTGTATGGTGCCGTCAAACGATCAAACCTTGGAGGG  
CCTCAAAGGAGGCCTATAGGTTATGGAAAACCTCTGATGTCACAGTCTGAAGCCAGTCTGCTTGGGTTTCGGGCCAGACGAGTTTGTGACTGATCGT  
GAGTATGAAACCCGTGTGCAATCATACCTCGAACAAGGTGTTGCGCAAGGTGCTGATGGAGTGTTTCTAGCCGATAAGAGACCGGAGTTGATTGCC  
AAGTCACAACACCGTTACGAGCCGAAATACCCCGCACTCACTTCAGAGGACCGTTCCATGGCCAAAGAGATAGCCCAAGCCATGTTTGATCAATATC  
CAGAAGTCTTCGCTAATTGTGACGTTCTGCCACCAAGGGCAGTCCACAACCTATGTGAAGCAAAAATATTCTCCAGGAACCCCGTTCATCAAACCTGG  
GGGCTTCAAATCTCGTCAAGCAATGTTGACGCTGGTTATGACCGCGTCATGCAACGACGGGCAATGCATTACTTGAAAACCTGGTGAATATCCA

> Cb\_clean\_k141\_63002

AAATCGACCTGGTTTATAGCTGCCCTGTGGAAAGCTAGACACCGCCAAAAGGTCAGGAAATTTTGGCTTGTCGAACCTCGATTGGTGTGCGCGAC  
AATACGCACATACCATTTCGACGCACCTTATCAAGTGCTTAAGGATAACATCCAAGTTTCAAACACCCACGATATACACATCTTGACGTACGGACATTT  
ACAGTCAAGATTGTTGGATATAGACAATGAACGTGATATCGTCGTCTTTGACGAGTTTCATGAACAACAGGGTGAAATGATCCTTGGGCTTGACAAG  
TGCAAGGCGCCAATCTTTCTTCTCTCGGCCACGCCAGCCGAAATACCATCTCTGCACGGTTCTGGAACCTCTGGTTCCAAACATAGACAGACGACATC  
CAATCCAGATCCACCAAGTGGATGACGGAATGGGTGTTGTTGACATGTTTATGGAAGCCAGAAACCGTTACCCCTGGTTTATGCAAGAGAGCGATGAT  
TATTGTACCGACTCATAAGGAGGTTGCAAAAAGTTATCGCTTCCCTTGATTATCTCAAGGTAGGTAAGGTGTCCCCTCTATCCGCACGCGATCGCGTGG  
TACAGGAAGAAGGAATACTGGTGTGCACCCCTTACGTCCAAACTGGTCTAGATATAAAACCACCACCCGATCTCTTGATCGATTGTGGTAAAGACTT  
CGTTTTTGGACAAAGGGCGTCCAGTATTTCCACTCCCGTGGACAGACAAGGACATAAACCAGCAGAGAATTGGTCGTGTTGGAAGATTAAGACCCGG  
AATCGTCTTCCAACCGAAATCAGCAGGTTCCGGAAAGAAAGGTGTGGTTTACCCGAGCCCACATTTATTCCAACATAAAGCTGTCGCCGCGTATTTG  
TGGCTGGACGACGAGCTCACGAACGAGCCTCTGTTTTGGAC

> Cb\_clean\_contig\_1397

ATGATCTTGATGATGTCGCTTCCGGTGAAAGGCATGGTGACGGTGGTTTGGTGTGGTAGTGGTGAAGGTACTGAGGACGAAGTGGGAAGGCTTCTA  
GAGCTTGTCGTCGCAGGGTGTTTGCTGTGGTGTTTGTGGTGAATGGGGGAGAAAGAGAAACACAAGTCAGGCGCTGCTGGCGACAATATACTTGCT  
CGTCACTTCTGACGTAACACCAGCGCACTTATTACACTTCTTGGTGCACAAGAGCACAGGGCACTTGGCCAGCACCGGCACGTCTCACACACTGA  
CCCACCCACAAGGCACACGCTCGGCAACGACTACAAAACGTAAGATAGACTGTTTAATCATTCAAGGTACAAGCGATCAAAGCTAGTCTCCTATGG  
AGACGCGCTTTATCATCTCTACCGAGAACACGCAGTCCAGTACGGATTTGTCAAAGAAGACGGAAGCACAGAGTACAAATCTGTCAAGCCAATGTC

GGTCATCAACGGAAAGTGGATAGAGTTAGAACAATCGCCGACGACTAAGATTGATATTCAAGAGTTGCCGCAACAGGAACTTTCAAACAAATATCA  
ATCTTTCGAATCATCAATAAGGCGATGTCGAGACTCCATTCTTTTCAAAGCCAAGGACATGCCTAGGCATGACTTGGAACGTCTCAACTCCATGCCA  
GGCGCGCTAGGACTTGCACCCAAAGATCTCGATTCTCGCAGCATCCTCTTCGCAAGAAACGCGCTTCTTCGCTTTGCTGAGCAGTTCCTTGGCGCTT  
CGATATGAGGACAAGGCTCCTCTGAAGTTCCCGTCTT

> Cb\_clean\_contig\_1993

AGGAGGAGGAGATCCTATATTATACCAACATCTTTTCTGATTCTTCGGTCACCCAGAAGTTTATATTTTAATTATACCAGGTTTTGGTATAATCAGTACA  
ACTATATCTGCAAGCTCAAATAAAAGCGTATTCGGACCTAGGTATGGTATATGCTATGATGTCTATAGGTGTTTTAGGGTTTGTAGTTTGAAGTCACCA  
CATGTACAGTGTAGGTTTAGACGTAGATACACGTGCCTACTTCACTGCTGCTACATTAATAATAGCAGTACCAACTGGAATTAATAATTTAGTTGATT  
AGCTACTTGTTATGGAGCGTCAAGAATGTGATGGAACCCCTGGCAGCACCGTAAACAAGTGGGATCAATACGCAGACGAGTACATACAAGCTCTG  
CGTTCGTCTCCACGAACAGAAAATACGTTGCTGCCAAGACTTCAACCGGCAAATCGACCTGGTTTATAGCTGCCTTGTGGAAGCTAGACACCGC  
CAAAAGGTCAGAAAGTTTTGGCTTGTTGAACCTCGATTGGTGTGCGGAGACAACACGCACATACCATTGATGCACCTTATCAAGTGCTGAAGGAC  
AACATACAAGTTTCAAACACCCATGATATCCACATATTGACGTATGGACATTTACAGTCAAGGTTGTTGGATATAGACAATGAACGTGATATCGTCATC  
TTTGACGAGTTCCACGAACAACAGGGTGAAATGATCCTTGGACTCGATAAGTGCAAGGCGCCAATCTTCTTCTCTCGGCCACGCCAGCCGAAATA  
CCATCTCTGCACGGTTCGGAACTTTGGTCCCAAACATTGACAGACGACATCCGATCCAAATCCACCAAGTGGACGATGGGATGGGTGTTGTTGAC  
ATGTTTCATGGAAGCCAGAAACCGTTACCCTGATTTATGCAAGAGAGCGATGATCATTGTACCAACTCACAAGGAGGTTGCAAAAGTTATCGCTTCCC  
TTGATTATCTCAAGGTAGGTAAGGTGTCCCTCTGTCCGCACGTGATCGTGTGGTACAGGAGGAGGGAATACTGGTGTGCACCCCTTACGTCCAAAC  
GGGTCTGGATATAAAACCACCACCAGATCTTTTGATCGATTGTGGCAAAGACTTCGTTTTGGATAAAGGGCGTCCAGTATTTCCACTTCCGTGGACA  
GACAAGGACATA

> Cb\_clean\_contig\_3558

GTCATTTCTCTCGTTCTAAAGTCAGTGAACCTCAAAGATCACATCAACCAGTACCTGGAGTCTACAGATGTCAAGATAGTAGATCCGGTGCTGGTCGC  
GGCGATCGCAATGAGTTTTAAGTCGAAATTCAATTGTCCAAAAGAAACCAGCTCTTTCGCAATTGATTTTAGGCTCGACCGAAGAATGGTTGTTTTT  
TGTGCCACAGATTTCCCTGAAGATAAGAACAAGGGGAACTTTACTGGTGCATCGGTGGTAGTGTTATCGTCCATGGCGGGTTGCTAGGTATTGAAG  
ATGGGAAGTCTTGTTCCCATCATTAGATCACTATAGCAAGTTATGGACGATGCCACTTCCGAAATTAGGTTGGGTAGACAGATCTTTTGACGCTGAA  
TACTTCACGAAGATCTCAACCTGGCAAAGGCCCTCGATCGGTGTGAACCGATCGTTGTATTCTCTGAACACACATTGCAACGTATACTCTACCAGTA

TTTTGATGGTGTGACAGACAAAGTTTTGTCCCCATCACATACTGCAATCGTTGCTTGTGTGGTGAAATCCTTGATGAAATGCCCGGAGAACGGGGTA  
GGGTATGCAGTACAGTTTGACAGTCATGGGGCTTCACTGTACGTGTGTCGGCAACCGAATTTTCGCAGAGGTGAACCGGTTGTGGTACTTTTCATTGGG  
ATTTCCCTTTTCGTGCACGGGGGAAGAAAATCTTATGCTCCGGAGCCTAGGCGGTTCTTTTATACTGAGCATCTTAACATAGATTATTCCATACCCATGC  
ATGAGGTTTTTGTGGAAGGATCTACCTAAGTCCAATTCTTCTCATTTGACTGTCAGGAGTCAACAAGAGTTGTATTTTCGGTTTTTCAGCAACAAATT  
GATCTGTATGATGCGCCAACGCCGGCCTTCATGCATTCAAGAGCACATGGCACAGCTGAGCAAGCCATACGTGACACAGTGCCCAAGATGAGAACT  
TCTCAGTTCAATTTTGAGCAAGTTGCTGCGATAGCCATGTGTTATAGATCCAGAATGCAATGTCCATCTCCGGAGTCTGCTATGGCTATCGATTTTGAC  
TTCGCCAATGAGCGCATTGTGTTCTTTTCGAACCTAGGCAGTGGGTGTTTCCGCTGTGCGGGCCAAATGTGGTGGTGTATAAACGGGGTTGGTCTGA  
TTCATACTGGATCAGTGTTCCACACCTACCACAACCAATCAGGCCAATCTCGACCTAGTCCCCGAGTGTGTAGGTACTGGGACGAGATTGTTTCTTTT  
CATTTGACCGAATTCTGCCAACCACGTTGGGTATTGGACATCGGATTTTCACCTGCAACCTGACAAAGATGAACAGTTGCAGAGGGCTCAGATTG  
CGCTGGATGCACATAATGATCCTGTTGAGCCTTTCAGCAGGGACATTGCCGTATTTTCATGCATTTGAGGCGATCAGACAAACGGCCCATGCGGTGAT  
ATAACTGTGATGAGGATTGAACATTTGATCATCATGGCGTGCATATATCGTTCGAAAATGGCGTGCCCTACAGCCGGCACCTCAATGATTGTCCAGTTC  
GATTTGTCAAACCAAAGAGTGAGGTTTCGGCGTTGCAAGGGGAACCCATCCGGAGTTGGATGGCAGAATGTGGTGGTATCTGCACGACGATTGCATG  
ATCCACACTGGTAGGCCGGAAGCCTCACTCCGGTGAGGTTGGAACCTCCGTTGCCTGTCAGCAGTCGGTTTTCTTTTCGTGCAACTCATCGTCAGG  
CCAAGGTAATGGCTAACGATTTTGAAGAGAAGTGAGAGAAAGACTCTAAGTGTAGGGCCCCGACATGGCACATTGAAGGTGATGATACACCGAAGC  
AAAAGCTTGCTCGGTCCCATCACCTTTGTGGTGTCCGGATACGTTTCGACGAGCGGTTTCGACGAGATCTTCGTTGCCGCTTACATTTGGTTTTTCTTT  
CAACTCATTTGCACGTTTTACTTTTCGTTTTCTCGGCCAAATCTTCGGCGAAAACCTGACAAACACACGGAAGGAGGAGAGCATCCTCTTGGAGATG  
AGGGTTTTTCTGCATCATCCTCCTTACTCGTGTGCAAGTTAGGAACCAGAGGTGACCAAGTCCCTGTCGATTATTACGCGAACGTGGCTGCACACTAT  
GGTGTCCGCACACATTTCGCACGTGTACAAAGATGTGACGACAGATGATCTTGAAAAGATGAAAGTTGGAGACTTTTCATCTAGTTCCGCTGGTTATT  
TGAATCTTGCGTACGCTTCTCAACTTGGTTATAAGAGAGTTTTTACCCCGCATGTGGAGGTGGAGCGGTCTCAAGGTGTGAGTTATACTTTGTCACCA  
AGTTCGAAGTGGGTGGAAGCAACGAGGTTCAATTGCTGATTGGTCGAGGGTTTCTTGGTCCAATTTTCTCCCCGCGTGGATAGCCACGAGGGTTACTG  
CTGTGTATGTGCCAACTTTCAGAATTGGTGCCTTGTCTGGAAGTGACATCCCGCGTTTCTCATGACGGGTTGAACTTGCTGGAGAAAGTTAAGAACAC  
AGCAAAGTTCGATGAGGGTTGGACATCTGGCAGCTCGTCAGTTTCAGTAATCCCTGACGAGATCAAGTTAAGATGCCCCGAAATACCATCGGGTAAC  
CATCTTGAAATATTAAAGGATTACAAAACGGTGACATTCATGGTGGAGCCGGTACTGTGCAAACTGCTATTGCTTGCGGCGCACGACCGGTATCC  
ACGACAAGACACTCGATCGAGTGTATCATAGGATGCCTGGGCCAGAGGATTTCAAACAACCTTCTATTGGGAAGTTTCATGGGTTGGTTGGTATCTGC  
CGGTTTTAACGTTAATGCACCAATAGAGGTAAAGAGCGTGGTGGTTGTTACAATGGTATTGGTCGCAAAAGTGGAACCTATGCGTACGATGCATTAGTTA  
CACTTGCTAAAGCTTACACCATATCATCGTATGTGTACAATCATTGGGAGCTTTTCCTCATTCTTTTCTTCACCGTTCCGGCAGTGGTCTGGAGAATGT

TGTTTTCTTCTAAATCATTGTTCTCCATAGTCAAAATTTGTGCGCTTGGTTTTTGGCGCTACCCTGTGTTGTGTTTGTGGATTGCGAAAGTCACTTTCG  
TGGCAGGAATCTGGTCAATGCAAACTTGTGGATGGGCGCGGCGCAAGATTTGTCTGCACTTATGGAGACACGATCTTCACTGGTTTTGGGAGCCAG  
TGCAAAAGACCGTAGGTACGAAGAAGTTGACGTTCCCTTTTCCCCTTGGGCATTGGAGCATGAAGGACAACCAAATGGTAAAATCTACGAAGGTA  
GGTTTGTTCGGTCCCTCCGAACTATTGGAGGGAACCTTTCGCCTTGTAAGCACTACTCGTGAGTACAAGCGTGGGTTTAAGTCTTTTCCCTGCCCCCTTC  
AATGTTGGCCATGCAGAGTCTCTTGTGAAGGCTCAGCACGTAGCACCATATTCATCTTCGCATAATTGTGTGACTATGATGGTGCAGCTTTGTGCTAA  
GAGATCGACTGCATGGACAGCATGTATGGTGATGGTAGGTGCCTTAACGGGACTTGCCCTGGCGCCGCCAAAATGCTCAAGGACATTCTTTCTTTT  
CTTTTCCCTGGCAAGGATTTTGCCAGTACTCCTTTTTATCGCTCGCTTGGCTTTGCCGCGTCGTTGGAAAACATCCCGTTTGAGATAGAAGGGATGGT  
CGAGACGACAGAGCCAATGCCAGAGACAGCTACACCTGAACCAACAGATCTGGCGGATCCAGATTCTTTCAATATGTTGGTCGATGAGATAGCGTTC  
ATCCAGGCATGCGTGGAACAGCTCAATATACCTACCTTGGACAAGGAGGCATTTGATGAGGTTTCACAGCGAACTTTGGAAAAGGAGTTGGACAAG  
GTCGAAATCCCTGAGGGTTCGTTAATCAGGGTTTCCAACATACCACCGAGAGTGCATCATGAGTGGGCGCAGCTGGTGGATGGTCTCCACCATGCTA  
TTTCTTTCGTTTCGCACAAATCGCGTCGCAGACGCGTTTGTGTTATACGTTAAGAATGCTGGTGAAAATATATATGACTTTGTCCAGCCGATACTGGAA  
ATCCTTTCCTTCTTTCTGCACCTTGCAGCTGAGCACTCCAAGCATGCATTCGATCGTTTGTTCAAATGGCTTTGTGATTTCTGGACCATGTGTGGGGT  
CTAGAAGCGTCAAGGAGAGTCAAAACAGTGTGGGGCCTGACTGGCCTTCATCGAACGGGATTGCTTGGTGTGAAAGCCAACTTGCGGCTAATGTT  
GCTTATTCTGATTTTCGTAGGTAGACAGGATTTTCGAATCAGATTACAACAAGCTGGTGCAAGAAGGCAAGCACCTTGCTCAGGTGTATGGTGCCGTTA  
AACGATCAAACCTTGGAGGGCCTCAGAGGAGGCCTATAGGTTATGGAAAGCCTCTAATGTCACAATCTGAAGCTAGTCTGCTCGGTTTCGGACCAG  
ACGAGTTTGTGACTGATCGTGAGTATGAGGGTCGTGTGCAATCGTACCTTGAACAGGGTGTTGCGCAGGGTGCTGACGGGGTATTTTTTGGCAGACA  
AGAGGCCGGAGCTGATTGCTAAATCTCAGCACCGTTATGAACCGAAGTATCCCGCACTCACTTCAGAGGATCGTTCCATGGCCAAGGAAATAGCCCA  
AGCCATGTTTGATCAATATCCGGAAGTCTTCGCTAATTGTGACGTTTTTGCCACCAAGGGCAGTCCACAATTATGTGAAGCAAAAATACTCTCCAGGA  
ACCCCGTTCATCAAACCTGGGGGCTTCAAATCTCGTCAAGCAATGTTTCGACGCTGGTTATGACCGCGTCATGCAACGACGAGCAATGCATTACTTGA  
AACTGGTGAATATCCAGTGCAATTCTATCACGCTTTTGTAAAATCGCAGGTGGTAGATATCAATAAATGCTTGAGTCCCGAGGAAGGTGGAAAAGG  
GAAAGATGTTTCGCACTGTGGTCAGCCAAGATCTGTTTTCTATTACATTGACCAATGTCTCCAAATTGAGCGCAACAAGCGCATAAACTGGGATACG  
TATGGTGCAGGTATAGGTATGCCTCTTAATCAGTCGATGGAGGCAATATACAGTAGAATGGCAGCTGCACAGAAATCGAGAGGAGGCAGGTACATCA  
TTGCTGATGCAACCGCCTTCGACTCATTTTGCAAACCTTTTCTTTTGAAGTGAATGCAAATCTTTGGGAACTCGGCTACAAAGATCATCCAAGCGGC  
AACGGCAAGAACCTCGCATCTGTTCTAAATGCGTCGTATCAAGCCAGACAAAATGCGTGGATAATCGGTGTGACCGAGCCGGAATATGACTCGTTGA  
CTGTTTGCCTCCAAGACAAAAACAGTCGCGAGCTCATACGGCAACGATCCCCAAAGACGGTAATCTGCTTGGAAAGATCTCATAGACTGGGACAAGT  
ACAATAGATTGCCTGCTGAGCAGCGTTCGAACTACGTTGCAAACTTCAGCCACCTGAAGGGAAGACGGTGGTAACCTGGGATCCTTCTCTCCGCC

CATCCAGGTCAAACCTGGATGGGTAAATATGAATATGGTGTCTTATCTGATGTTGACAAGAAGTTCTTCGAACATCAGACATTACCTACGATCCTTCA  
AATTTTGAAGACATGTACCAGGACATATTATCAGTTTCACGATCAAATTATAAACTGATGTCAAACGTGCATGCGAAGAATCGTGGTGGAAGTACTGG  
AGGGTCAGATACATCAAACGTTAATACACATGCCTTTAAGGCAGGTGTAATTTACGCTTGGTGTGAGACTACTGGTAGAGCTCCAAAGGAGTTCTTC  
CAGTATAATGACCTTGCCAATACATCAGATGACACCATCTGGCAATCGGGTGGCAAACATGGCCTTAACACTGTTGAGGACGTCGAAGTCTTTCGGC  
ATCACTGTGTCAGTCAGTGGGCATCCATCTGGAGATAGAAACAACGAAGAACATATCACAAGTGGAATACTTGTCAAAATTCGTTCTGTGTTCCCACTGC  
AGAGGATTCAGCAGCATTGAAAGTCTGGAGATCCCAGAAAATCAAGGCTGCTTCAAATGCCATAAACAGTTAGGCCTGACTGTTCCCACTTCTTG  
GGAACAGTTCAACAACCCGCAATTTGTGTCGTTCAAAACCCGTCTGCGATCTTGCTCCGAAGGTCTGCGTTTAGGTATTACCAATCAAACGCAAAT  
CATTGGAAGTACGTTTCAGTTGAAAGAGGTGCTGGTCATGCTCAGAGCACCGCCTTTCTCCCTGAATTGTATGGCAAGTTCGCACAAGAGTGGTGC  
GACGATATTAATGATCTTCTGGTCCAACAGAAGATCCATCGGAAGTTTAAGGTCACAAACGGTCAGTTTGGACTIONAGTGTGTGCAACAGGTGGATC  
CGAGGGCGTCGCAACAACAGCTTTCGCCACGTCAAGTTGCTTTCCTCTCGTGGTTGAGGGGGAATATGTTCCCTAGTTACTACAGGGTACTTGACAT  
CCACATGAACGTGCAAAAAGTAGATCCAGAACGACACGCTAAGTTCCTTCGTAAGCTTGAGAAAGGTTGGCGTGGTTGGGAAGAAGTGTACGTG  
AAGGGGTGGATAATCTCTACGCCTTAAGTATTCCATTCCGGATGAAATCAGCAAAAAGTTCCAACCCGGCCTCGATATGCTCTATGCGGAGCAACC  
GTTCTACACGAAGAACAAGGTGGTTGAAAAGTTTGTTTACTTGAAGCTTCTGGAGGAAAGCCCAGAGACGGAGGTCACATTTTCAGATTTTCTGC  
TCGGATTCAAGAGTCACCGTATGCGTCGGTGTGTGACCCCTATCACTTCTGGGAGAAGTTAGGGGAGCCTGAGTTCAAGGAGCAGTTGATGGCTGA  
AGATCCTCTTAAGATACAAGGTCTCGTTTTGCTTATAAGCACCATGTACCTGTAAACAAACACAGCTGAGTCAGTAGTGTGGCCATTCTTTTGTG  
GTCTATTCTACAAACTCTTCCTGTGGTCCTTTATCGGACTCAATAAGGTATATGGACTGTTGAACACTATGTACTGGCATTCCGAAGGTAAGTCTTCGA  
GGGAGATATCCCGAATTATGCCTCGAGATCCGTACATGGTGACGAAACAGTTTCGCTGCGTTTTTGCATCGACTTTGTACCATCACAAGTGGGTTACTTG  
GCCCTTATCCCATTCACATATTGTCCTTACTTCCAGTGCTGTTTGAAGCACTTGGAAAAGCGTGGTATGTGGCAGGGGAGGTCAAGAATGTGATGG  
AACCTCCTGGCAGCACTGTAAACAAGTGGGATCAGTACGCAGATGAGTACATACAAGCTCTGCGTTTCGTCTCCACGAACAGAAAATACATTGCTG  
CCAAGACTTCAACTGGCAAATCAACCTGGTTTATAGCTGCCCTTTGGAAAGCTAGACACCGCCAAAAGGTCAGGAAATTTTGGCTTGTGCAACCTC  
GATTGGTGTGTCGCGACAATACGCACATACCATTCGACGCACCTTATCAAGTGCTTAAGGATAACATCCAAGTTTCAAACACCCACGATATCCACATC  
TTGACGTATGGACATTTACAGTCAAGGTTGTTGGATATAGACAATGAACGTGATATCGTCGTCTTTGACGAGTTTCATGAACAACAGGGTGAAATGAT  
TCTTGGGCTTGACAAGTGCAAGGCGCCAATCTTTCTTCTGTGCGCCACGCCAGCCGAAATACCATCTCTGCACGGTTCTGGAAGTCTGGTTCCAAAC  
ATTGACAGACGACATCCAATCCAGATCCACCAAGTGGATGACGGAATGGGTGTTGTTGACATGTTTCATGGAAGCCAGAAACCGTTACCCTGATTTAT  
GCAAGAGAGCGATGATCATTGTACCAACTCACAAGGAGGTTGCAAAAAGTTATCGCTTCCCTTGATTATCTCAAGGTAGGTAAGGTGTCCCCTCTGTC  
CGCACGCGATCGTGTGGTGCAGGAAGAGGGAATACTGGTGTGCACCCCTTATGTCCAAACTGGTCTAGATATAAAACCACCACCCGATCTCTTGATC

GATTGTGGCAAAGACTTCGTTTTGGACAAAGGGCGTCCAGTATTTCCACTCCCGTGGACAGACAAGGACATAAACCAACAGAGAATTGGTCGTGTT  
GGAAGATTAAGACCCGGAATCGTCTTCCAACCGAAATCAGCAGGTTCCGGAAAGAAAGGTGTGGTTTACCCGAGCCCACATCTATTCCAACATAAA  
GCTGTGCGGGAACACTTCAAGGTCCCACAGCTCGCACCCACTCGTCAACTGCTGGTATTTTCGACGCAGTGAACATTGCGCCTTCGTTGCGCAGCTC  
ACTTGCAATGATCTTATCGGCGTCAGTTCCAGAGCTCGCAGCTTTGTCAAAGAGGGCCCTTCCACGTCTCGTTTCGGGGTAAGATGAGGATGTGTTCCA  
TGAATGCCTCCAAGACCATCTCTTCCATGAAAGAAGTCCGCCATCAACATTTGATCAGTAAGTGGATGATCGCTGCCAACAGCAACGATGGGCTTCG  
TTTTGCGCAGAGCGTCAAAACCCAGGGGCTTGCCTTGAGCTGCTCGCCACTCGATCTCTTTCTCAATATGGAAGAACATGGAAACGACATTTCTTAG  
ACAGTTTTTCCACGTGATATTGCCATAGGTGATCGATAGAAGTAGTACTTCGAGTTCTTCCGGCAGGGCAGAGAGTGCCAGTAACATTGCCATAACAT  
CGTCCACCCCTGGGTTCGGTATCTATGATGACTTTTTCGAGCCATGGCTGTGATTTTGTGTGATGAAAATTTGTGTGTCAAACCCCTACGCGTAATGAACG  
TGACCGGAGGTGGGAACCGCAAGGTGCACCATCGACCGATCCTGATGTCTCGGATGGATTTGAGTAAGAGCATAGCTGTTGGGACCCGAAAGATG  
GTGAACTATGCCTGAATAGGGTGAAGCCAGAGGAACTCTGGTGGAGGCTCGCAGCGGACCCTGTATCAGCTTGGCAGGCAGCAAGTCGGTTGAA  
GGCCAGCCTCTCAACAGATTGATAGCTTCTTTCGCAGACGACATCTTTAGCGCAGAGTTCGCTCGGGGCTCGATAGCGGCGGCGGCTGTTGAGTTTG  
ACCAGAATAGATTCCGAACGAGGCGGAGAAGATCGTTTTCTGGGCATTGACGTGCTCGGAGGAAGTCCTTCTCGTCCTACCTGTCCACTGCTTGCTGC  
CGAACGTGACTCCTCAGCCTTGCGAGCAACGGAAGGAGCTGCCCCTAACTTTCGTTCACTGATTAATGAAAACATCCTTGGCAAATGCTTTCGCAGT  
AGTTCGTCTTCAATAAATCCAAGAATTTACCTCTGACAATTGAATACGGATGCCTCACGAAGAAGTTGACCAGCGAAGGAGTAGAGATGGTAGCC  
GTTTTCCATGCGGTGTTTCCAAACTGATGCGCTGGTCGCGACAAATCGTCCACTGGGGTCCCATTCATATCTTTGATACCGTAGTGGTCGGCTGTGT  
TCATGAGTTGGAGGTTGGCAGTAAGATCCTTCTCCTTCTCGTCCTTCTCACCCCTCGAAGTCGAAGTCCCAGAAGTCCAGATCGAAGCTCTGCTGGTT  
CAACACTGTGGCAACAATACAGAATCGGCCATTTCGGTGACCAAGTGAATGGCATTGTTGTTCTTCTTGTCCACGGTGCGAATGAGCTTGAAGTTGCCA  
ACGGCATTACCCTTGGCCTTCTCAGGAGCGAAGAAGGAGACGGAAGTCTTGGGGGGAATAGCAGCACCGGCGGGCACTTCGCCAGCAGTTATGAG  
GACGAAGCGATCACCTTTTGGCTCCACGCGAAGTTGATGACGGTGTCTTCAAGCTGTGACAACCTTCGACAGGCACACCCTTTTCTTGTACGCG  
GAAGATTTTCGAGGTTTCGTAGCGAGCGACTTCTTCGATTTGCTGTGTGATCCACCTTGCAGCAGAGGAATTTTCGAGTCGGATTGCCAGTGGAGCTTC  
GCGTCGCTAACGTTGAAAAGGTTTCGTGTTTCGGACAATCTCTTTTGACGGAATAGACATGATACCGACCTTGGCCGGGTTTGAGCCCATCTCAGGTG  
TCCAGTATGCGAATAGTTGCTCGTAGTCCTTTTGCTCAATGCGCTTGGATTTCGCCGGGCACCACTCAAAGTCCTGTACTCCTTCGATCTTCACGCTTA  
CCTTGTCCATCAGTCGCATGCTGGGAAGTTCGTAGACGGAGATGCTCTGGTTGGGTGTCATTTCGTGCAACGTATTTTCGAGTCTGCAGACCACTTGAA  
AGCTGGCCATTGAATCTTTTGCTTAATCGGGTTGCCTTCGGGGTCGAGGCCAGGGCTAGGAAGGTTCGAGCGTAACGAAGGATCGAAGAGGCTTGCC  
GGTCGCGACGTCCAGATGATGTAGTTCTTGCCATCCTCCTCGAGCGAGAGGATAGGGTTGCCTTCGTCGACAACCATGGGGCGGTGCGACCACGT  
TGTGACGTACTTCTCATTGGGCGAAAAGTCGACCAGGTTGACGCCTGGGTGCATGAATCGCTTTTGCCTCGACCACTGCGGGCCTCCCCACAGCTG

AACACCTTGCGCATGCATCGATGTCAAGTATGTGCCTTTTGGTGACCACTGCACGAATGACTCTGTCCAGTGTTGACGATCCACAATCTGGTCAGGC  
GCAGCTTCCCTCTCGTTCCAGAACACGCCCACATTATCACCGCGGTACATGACGAACTGGTCTCTGCCATCTGCATCTCCCAACCACCATCGCAAGT  
GCTCTTTCTCTTCGAATGGCGCGATCTCTGGTGCCTTGTATGTCTCGTCGATTCTTCCCTCACGACCGAATCGCTCAATATCGGTGAGCTTGTTGACAG  
CCATGGTGTGCTTCTTGTGCGAGCGGCTGCGCGTGAAGTGCCTTGACTGCGGCAGCGGCCTGTGCTGGAGTCTCATACTCGACGAAAGCGAATCCCT  
CTGTCTGGCCTGTCTCGCCGCTGAGGGGCATGAACACATTCTCCTCCTTCGTCTTCCCGACCTTGGTCAAGCTGCGCAGCAAGAACTTGATGAGCTT  
GTCCTTGCTGGCTTCGGGAACCTTCGGCAGGCCGTCGATGACAATGAAGGTGTCGAGGCCCTCCTCCATCACTGTCTCAAATTTCTCGCGCAAGTCT  
GAGAAGTCGATCTCCTCATCGTCAACCTCGTACTCCGTCTCCGGATCGAGGTTCTCGAAAGATGGCGCCATGGTTGCGGTCTTGATGTGCGTGCGCT  
TTCCGATGAAAGCGCTGGACGAGCAGATGGCGGCCGTGTATTGTTCCAGCAGTCACAACCATTTGCCGCGCTGCTGCAAGCTTCGGAGATGGCGAG  
CCAAGAGTCTGCACGAGCTGGCAGGAAGTCGCACCACCGCAACGCTCAGAGCATGTCGAGTTTGCCAAACACTCCTCAGCGTAATCAAGGCATGC  
GCGGTCAGCCTCCATTTAGACGCCTCAAGCTCAACGTGGAATTCCTCGCCAATCTCTGGCTTGTTGAGGAAGTATCTCGTTGGCAAGACTGAGAG  
GTCACCGAACTGCGATGTCCACTTCTTGTACAGCTGCTGGTCTCCTCCTCGTGGGAGCCATCATGGCTGCTCTATAAATGTTCTAAACGAAGAACGTT  
GTATAATTTTGTGATGACAATAAAATACAGGCATTTAATGGGAATCAGGACAGGACACAAAATGCATATTCTGATGATGGGGGATAACCTACTTGTA  
ACGGCTGTAGATTTTAGCGATGTTGTTAAACGGGTGGGTTTGAGAAGTCGAAGAGGGTGAGGCGAAAAGATCGCAAAGTGGCGAGAATTGTTAG  
GTCAGCAAAGAAAACCTTTCCAATCGAGGCCTATACAAAAGAAGTTTACAACCCATAGGGCCGTCATCCTTCACGCGGGATGGCTGGATCAGGCGC  
TAACCCATTGTCCAACCCTTGCTGCATCCGCCGCCAAGATTGCGGGTGCAACTATTGACGGCCACCCGCTCACCTTCTGATATCCTGTATCGCCTGCC  
GACGATGTATGCTTTTCGGCAAATAGTGCCTCGATGAGACCGACGACCTCCTCAGCAGTGTA CTCCATGCTCAACTCGCTCTCCTTCCACATGTA CTTG  
ATGTCTGCAAGACTGCTTTCCATGATCTCAGCCATGTATTGGAACCTCAGCCAATTTGGACAATAGACGAAAGTCATGTGCGGGTCGTTCTGCACAA  
ACAAGTCCTTGCCGTCGAGGCCTGGTCGATCAAAAACATGAGCTGTTTGGAGTCCGCCACGCCAATGTCCGGCAGGTCTTCAAATTCACGAATAA  
TCTTCTGCGCGATCGATGACAAGAGGCTTCCAACACT

> Cb\_clean\_contig\_4473

TGCGCATTAGGTTTCTGGCGCTACCCAGTTTTGTGTTTGCTGGATTCAAAAGTTGCCTTCGTGGCAGGAATCTGGTCAATGCAAAATTTGTGGATGGG  
CGCAGCGCAGGATTTTGGGCAATTATGGAAACACGGTCCTCGCTGGTTTGGGAGCCAGTGCAAAAGACCGTAGGAACAAAGAAGTTGACGTTCC  
CTTTTCCCCTTGGGCACTGGAGCATGAAAGACAACCAAACCTGGCAAAATCTATGAAGGTAGGTTTGTGCGTTCCCTCCGAGACTATAGGAGGAACT  
TCCGCCTTGTGAGTACCACTCGTGAGTACAAACGTGGATTCAAGTCTTTTCTGCTCCTTTCAATGTGCGGCATGCTGAGTCACTCGTGAAGGCACA  
ACACGTGGCACCATACTCATCTTCACATAATTGTGTGACTATGATGGTGCAAATTTGTGCTAAGAGATCGACTGCGTGGACAGCATGCATGATAATGG

TTGGCGCCTTAACGGGACTTGCTCTGGCGCCGCCGAAATTGCTCAAGGACATTCTTCTTTCCCTTTCCCTGGCAAGGATTTTGCCAGTACCCCTTTT  
TATCGTTCGCTTGGCTTTGCCGCATCCCTGGAGAACATCCCCTTTGAGATAGAGGGGATGATGGAAACAGCAGAACCAATGCCAGAGGCAGCTACA  
CCTGAACCAACGGATCTGGCTGATCCAGATTCTTTCAATATGTTGGTTGATGAAATAGCGTTCATCCAGGCATGCGTGGAACAACCTCAAAATACCTAC  
CTTAGATAAGGAGGCATTTGATGAAGTTTCACAGCGAACTTTGGAGAAAGAGTTGGACAAGGTTGAAATCCCTGAAGATTCGTTGATCAGGGTTTC  
CAACATACCGCCAAGAGTGCATCATGAGTGGGCACAATTGGTGGACGGTCTCCACCACGCGATTTCTTTTCGTGCGCACAAACCGTGTCGCTGACGC  
ATTTGTGTTATACGTAAAAACGCTGGTGAGAACATATACGACTTTGTCCAGCCAGTACTAGAGATCCTTTCCTTCTTTTTGCACCTTGCAGCTGAGC  
ACTCCAAGCATGCTTTCGACCTCCTGTTCAAATGGCTCTGCGATTTCTAGACCACGTGTGGGGTCTGGAAGCATCAAAAAGAGTTAAACAGTGT  
GGGGCCTAACTGGCCTTCATCGAACTGGATTGCTTGGTGTGAAAGCCAAACTTGCAGCCAACGTTGCTTATTCTGATTTTCGTAGGTAGACAAGATTT  
CGAATCAGACTACAACAAGTTGGTGCAAGAAGGCAAACACCTTGCTCAGGTATATGGTGCCGTCAAACGATCAAACCTTGAGGGGCCCTCAGAGGA  
GGCCTATAGGTTATGGAAAGCCTTTGATGTCACAATCAGAAGCTAGCCTGCTCGGTTTCGGGGCAGACGAGTTCGTGACTGATCGTGAATATGAGAA  
CCGTGTGCAATCATATCTTGAACAAGGTGTTGCACAGGGTGTGACGGAGTATTTTTGGCTGATAAGAGACCGGAGCTGATCGCCAAATCACAGCAC  
CGCTATGAGCCGAAGTACCCCGCACTCACTTCAGAGGATCGTTCTATGGCCAAGGAAATAGCCCAAGCCATGTTTGATCAATATCCGGAAGTCTTTG  
CTAATTGTGACGTGTTGCCACCAAGGGCAGTCCACAATTATGTAAAGCAAAAATATTCTCCAGGAACCCCATTCATCAAACCTGGGGGCTTCAAGTC  
TCGTCAAGCAATGTTGACGCTGGTTATGACCGCGTCATGCAACGACGAGCAATGCATTACTTGAAAACCTGGTGAATATCCAGTACAATTCTATCAG  
CTTTTGTAAATCACAAGTGGTAGATATCAAGAAGTGCTTGAGCCCCGAGGAAGGTGGAAAAGGGAAGGACGTCCGCACTGTGGTTAGCCAAGATT  
TGTTCTCCTACTACATTGACCAGTGTCTCCAAATTGAGCGCAACAAGCGCATAAATTGGGATACATATGGTGCAGGTATAGGTATGCCTCTTAACCAG  
TCAATGGAGGCAATATACAATAGAATGGCGGTGCACAGAAAACGAGAGGAGGCAGATACATCATCGCTGATGCAACCGCCTTCGACTCGTTTTGC  
AAACCTTTCCTTTTTGAAGTAAATGCAAATCTTTGGGAACTCGGCTACAAAGATCATCCAAGCGGTAACGGCAAGAACCTCGCATCTGTTCTAAATG  
CGTCGTATCAAGCCAGACAAAATGCTTGGATAATCGGTGTGACGGAACCAGAATATGACTCTTTGACTGTTTGCGTCCAAGACAAGAACAGTCGTG  
ATCTCATAAGGCAACGATCCCCAAAGACAGTGATCTGTTTGGAAGATCTCATAGATTGGGACAAATACAATAGATTACCTGCAGAGCAACGTTTCGAA  
CTACGTTGCGAAACTTCGACCACCTGAAGGAAAGACGGTGGTGACCTGGGATCCTTCTCTCCGCCCATCCAGGTCAAACCTGGATGGGTAAATATGA  
ATATGGTGTCTTGTCTGATGTTGACAAGAAGTTCTTCGAGCATCAGACATTCACGTACGATCCTTCGAACTTTGAAGACATGTACCAAGACATATTAT  
CAGTTTCAAGATCGAATTACAAACTGATCTCGAACGTACATGCGAAGAATCGTGGTGGAAAGTACTGGAGGGTCAGACACATCAAATGTAAACACAC  
ACGCTTTCAAAGCAGGTGTGATTTACGCTTGGTGCCAAACCACTGGCAGAGCTCCTAAGGAGTTCTTCCAGTACAATGACCTGGCCAATACATCAGA  
TGACACCATTTGGCAATCGGGTGGCAAACATGGCCTCAACACTGTTGAAGATGTCGAAGTGTTTCGACATCATTGTCAATCAGTGGGCATTTCATCTG  
GAGATAGAGACAACGAAGAACATCTCACAAGTAGAATACTTGTCAAAATTCGTTTCGCGTCCCTACTTCCGAAGATTCAGCAGCGCTGAAGGTCTGG



AGATCCCAGAAAATTAAGGCTGCTTCGAATGCCCATAAACAGTTAGGCCTGACTGTTCCCACTTCTTGGGAACAGTTCAACAACCCGCAATTTGTTG  
TCGTTCAGAACCCCTTCTGCGATCTTGCTCCGAAGATCTGCGTTTAGGTATTATCAATCTAACGCGAACCATTTGGAAGTATGTTTCGGTAGAGAGAGGT  
GCCGGTCATGCTCAAAGCACCGCCTTCCTACCTGAATTATATGGCAAGTTTGCACAAGAGTGGTGCGACGATATCAACGATCTTCTGGTCCAGCAGA  
AGATTCATCGGAAGTTCAAGGTTACAAACGGCCAATTTGGACTACAGTGTGTGCGAACAGGTGGACCCGAGAGCGTCGCAACAACAGCTCTCGCCG  
CGTCAAGTTGCTTTTCTCTCATGGTTGAGAGGAAATATGTTCCCTAGTTACTACAGGGTACTTGACATCCACATGAACGTCGCAAAGGTAGATCCAG  
AGCGGCACGCTAAGTTTCTTCGTAAGCTTGAGAAAGGTTGGCGAGGTTGGGAAGAACTGTTGCGTGAGGGGGTAGACAATCTCTACGCCTTAACTG  
ATTCCATTCCAGATGAAATCAGCAAGAAGTTTCAACCTGGCCTCGATATGCTTTATGCAGAGCAACCGTTCTACACGAAGAATAAGGTGGTCGAAAA  
GTTTGTTTACCTGAACTTCTGGAGGAAAGCCCAGAGACAGAGGTCACATTTTCAGATTTTCTGCTCGAATTCAAGAGTCACCGTATGCTTCGGTG  
TGTGACCCTTATCACTTCTGGGAGAAGTTAGGGGAACCTGAGTTCAAGGGGCAGTTGATGGCTGAAGATCCTCTTAAGATACAAGGTCTCGTTTTGC  
TCATAAGCACCATGTACTTATTGACGAACACAGCTGAGTCGATAGTGTGGCCATTCCCTTTGTTGGCTTATTCTATAAACTCTTCTGTGGTCCTTTG  
TCGGACTTAATAAGGTATATGGACTGTTGAACACTATGTACTGGCATTCCGAGGGTAAGTCTTCGAGGGAGATATCTCGGATAATGCCTCGGGACCCG  
TACATGGTGACAAAGCAGTTTGCTGCGTTTTGCATCGACTTTGTGCCATCACAGCTGGGTACTTGGCCTTTATCCCGCTGCACATATTATCCTTACTT  
CCAGTGCTGTTCTGAAGCACTTGGGAAAGCGTGGTATGTGGCAGGGGAGGTCAAGAATGTGATGGAACCTCCTGGCAGCACTGTAAACAAGTGGGA  
TCAGTACGCAGATGAGTACATACAGGCTCTGCGTTCGTCTCCACGAACAGAAAATACGTTGCTGCCAAGACTTCAACTGGCAAATCGACCTGGTTT  
ATAGCTGCCCTGTGGAAAGCTAGACACCGCCAGAAGGTCAGGAAATTTTGGCTTGTCGAACCTCGATTGGTGTTGCGCGACAATACGCATGTACCAT  
TCGATGCACCTTATCAAGTGCTTAAGGATAACATCCAAGTTTCAAACACCCACGATATCCACATCTTGACGTATGGACATTTACAGTCAAGATTGTTG  
GATATAGATAATGAACGTGATATCGTCATTTTTCGCAATTTACGAACAACAAGGTGAAATGATTCTTGGGCTTGACAAGTGCAAGGCGCCAATCTT  
TCTTCTGTGCGCCACGCCAGCCGAAATACCATCTCTGCACGGTTCCGGAACCTCTGGTTCCAAACATTGACCGACGACATCCAATCCAGATCCACCAA  
GTGGATGACGGAATGGGTGTCGTTGACATGTTTCATGGAAGCCAGAAACCGTTACCCTGATTTATGCAAGAGAGCGATGATCATTGTACCAACTCACA  
AGGAGGTCGAAAAGTTATCGCTTCCCTTGATTATCTCAAGGTAGGTAAGGATGCTGAACCCGCGATCTCATCCACGAAAATGCTCCTCGTATCGCC  
CACTGTCTGTATGCTCCGTTGTATGCGCCTCTTCCCTTGATAACCTTCATTATTGCCCTTGCTTGACGCTGTATGAAATTGTCTCTAGAACTTCTTCTCT  
TCTCTTTTCTGCCGCTCTCATCTCATCCCATCTTTCATGACCCGTTTCGTCTTGCCGGCCCAGCCCTTAGCAAAGCGATCTGATGCGGCGCCCGCGAGC  
GTGCCTGGGTTGTATTTCGGCTGGGACGTAGCCGCTTTGGGAGATTCCGCCGAGGAGGACGAAGATGGTGATGAGGACGAGGCCGAAGACGATGAG  
TTTGCGGAGGGGCGGGGTGGCGGGCTCCGTAGTCGGCCCAGGCGCGTTGGGCGCCGCCGAAGTGTTTCCTTGAGCTTGTCTGAGCCGAGCTTGTAGTA  
GACGAGACCTCCGAGGGCGATGGAGTAGCCGAAGGCTTGAGAGCCGGAGACTGGGTGCTGGAAGATCATCATGGAGGCTACGACGAGGAGGATAT  
CCTTGAGGACACCGGAGAGGGTCATGACGAGGGATGAGGTCTTGCCGATCAGGAACACGACAGAGACGTTCAAGAGGAACGCGATCATGGCATTG

ATGATCAATGTCAGGTATCCGACTTTCTCCACATCTGCCAGAGTCATCTTTGGCACCTCAATGAAGAGCGCAGTGAGACCGTTCATGATGGCGCAAG  
CTGGGGCGAAGTAGTAGAGTGAGACCAATGGGTCCATCTTGAACCTCGGCGCTGCTCAGCAGACGCTGTACCATGACGAGACGAGTGGCTTCGAAG  
ACGATTCCTCCGACCTGGTAGAGGAAACCGGTCATGTTGAATTGGATCTCGCCGTACGAGGCAATAACGACACCAATGACGATGAAGGAGACATTG  
CCGAGCGTCTTGAAGTTGACTGGAGCAACTCCGAAGATCCAAGATGCGATGAGGCCGCCTTCGGCTCTGCCACGGTTGTTGTTGTTGTTTTGCTGTG  
CTCAACCCAGCCTTCAATGGCCAGCGATCATTGTTGCTATTCTAGCGGGTTCTGGCTGATTTACAATGCTCTGTGACGTCGTCCTGGCGACATATTAT  
TAAGCTACCGCTTTATATCTACGCCGCCGCTGAAGCTTAACCAGCTGTTCTTTTTTACCAAAAAGCTTCCTTTACTACATTTATTATGAAGTCCTCTC  
GCGCCCATTACCGCCCCCTGTTTGGCGTGGGCGTCGGCCGGTCGCCGCCCTTTCTGGTGGCTGCACTCACCATTGGTCTCTGCATTCTGGGCGTCTCC  
TACTGGCGATTGGCACTGCAGTATCATGATCTCGAAGAGCAGCTAAAGAGACTCATTGAGAAGCGGGACTCTCTGGAGGCTAATCAAACTTCATCA  
ACAAACAATTGGAAATACGTGAAGAGAACTTTAGTGAGGCTAAAGTTTCCTTACAGAAGAAGGAGCAAGAGGTGGAAGACCTGAAAAAGAAGCA  
GGATCAAACGGGTAAAGAAGCTTGCTGAAATCAAGACAAGTTTAGAGCAAATTAACAAGTTAATGATAAACTAAAAAGTGATACTACCGAAAAGGA  
TCATTCGGTAGAGCTGCTTCGATCTCAAAACCAAGCGCTTGAATCTGATAAAAGCAAACCTGAATGCTGAAATCAAAGAGCTCAAAGAAAAGCTGAC  
AAACGTCACAAACACCCTAAACCAACACTCTTCGCTGCCATCATCATCTGCAGCTCTGAATCCAAATATTCCCAAGCCTGAATCGGCAGCTAGAAAC  
CCCGTATACAAGCTGGTGAACCCTGCGGCCGGCAAACCTGAGACAAAAGTCGACATAAACCCGCCTCCACCGCTTCCAAAACCGAGCAACAGCAA  
TGCCAACCAAATTGCACCTCCGCCGGAGCCAAAGAAGAATGTACCCTCAGAGGACAAGATGAAAGCGGAAGAGTCCAAACAGAACCCGGACATTA  
TTGATCCTGCAAACATTGCCATCGATGATGACATGGAGAAGGACGACCCCGGTCACGGGGATGCGGCGCATGAGGACCTCGAAGGGGCTATGGAAG  
GCCAAAAGGAGGGCAAAGTTGATAACTCAATCAACTATGTGGCCGACAACTCCAAAAACGCCGGTGGCCTGAACAACAAAAACTCGCAAGATAAT  
CTCATTGAATCTATACAGAACATTTAGGGAAGCCCCCCCCCTCAAAGATTGTACAAAAAAGCGCACTATCATTTTCTAAGTGTCATCATTTCTTTCTTA  
CACTGCATTTTGCCTGTTTGTGCCATCATTGTTCTTACTCACACTCTAGTAGTAGTAGTGGTTAGCACCCAAAGTATTACAGTACAAATCAATCACTTT  
CATAATATGATCACTTTTTGAGTTTACTTCATTCTTGTCTGATTATGTCATGCATTTTCGTATTTATAAGAAAAAAGAATACAAGAAAAGTTGGAAACAG  
GGTGGATAAGAAAAACAATTTACAAAAAATAAATTAAAGCAAATGAGTGTGAGTGAGGAGGAGAAGGAGATGTGAAGAGGGGAAAGAGAATAAATC  
TACAAAAGGGACAGATATGAAACAGGTAGAGTGAGAGCGAGAGAAAAACACAGATTACAGTTGGAAGAGCTAGAGGAGAGAGTTTTGCAGCAAGG  
TTCAATGGTTCAACGGGGATTGAACGGAAGAGTGATACGGAGGTGTTATCAAAAAGAAAAGTTTTCAAGTAGCAAATATGAAAATCGAGAAAAA  
GAGTTAGTGCAAATGTCAAACAGTTTAAAAATGGGGGGAGCGTTTAGCGAATTGTTCTGATTGAGAAAAAAAACCGTGTCACAAAACCTGGAAAT  
GAACATTTTTGAAGCGTGTGCAAATGGGGAGAAATGGAGAGGAAAAGAGGAGAAAACGAATTTGCCTTGAGTAAACACAGTATTATGGCTTGAAG  
ACAGTGAGACGACCAAATGAAGAGAATGGATAAGTGCTTTTGATTATTTGTAAGATAGAGAGAAGGGGTGATGATGAGGAGGGGGCAAATGAAGC  
TTCACCTCAGCAAGCAAAGCTTTATTACCTTTGTACTATTTTGTTCGAAAAGATCGGATTCATTACGGTTACACAGCGAAAATCATCAGTTGTTGGG

GGTGGTGCGACGTGAGAGGGTTCGGGATCGTCCACACCTCTTTCTCCCGCGTCTCCTTACTCTTCTGCGTCAGACTGTTTCGTTCGTCTTCGAAACGCG  
ACAGATCAATCGTCTGGAGATAACCATTGCACGTGGCAAACCTCCAGTAGCGCCAGACAGCAGAAGACATACTGATCGGGCATCTGAATACTGTGAG  
CGCGTTGAGAGCGGATCTTCTCGACGGTGCCTTGAATGTCGATAACGCCTGATGCTTCCAGACGCTGAATGGAGATGTCAATTGTGATGAAGGTACC  
AGTTCGTCCGATGCCTGCACTGCAGTGAACAACGATCGGCGGTCTAGTGGGTGACCTTTCCACTCTATGTGCTTCAAGTATTGCTTTTGATAGTCTC  
GGGTTTTCTGACGAAACTCCAACATTGCAACGGCCGATTGTGGTACACCAAAGTCCGGCCAACTGGAAAATTGCATGTGCACCACAGTTCTCTTTTC  
CTCCGTGTCTTGTGACCAGTGTTAGATTGCTAATGACCCAGTCCTTGTCTGCTCGATGGAGTTGTTGATGATCGTAAAGTTGCCACCGCGCAGT  
AGGTCTTCTGGTCGAGTGGCCAGTACTGATCGCACTTCACTCGACACCGCTCCACTGTCCGTGTGGTCATCACAATAACAATGCACTTGTTGTGCCA  
AACCATTCTCCAAAAGTCGTGAAAGGTTCTCGTCAGTGGACCTTGGGTAGAGATGAAAGCTCGTTTCTGTCTGTAACCGTCGACATAGTTGGCATTG  
ATGTAATCAGTACTGGGGTCGTCGTCAATCACCGGTAACCTTACTCTCGTGTGATCATAGCAGAGCACGTCAATGTACCGATTCTTTGTTGCATTGCGC  
CTTGACCGTGCAATCTCAAAGGAGCCCGTAGGAGGATTGCTCTTGATAAAGCTGTA CTGTCGTGCAGGCCCTTCTTCCCTTTAATGTT CAGATTTTC  
AATGAACTCCTGCAGTGAGACACCGGTAGCTTTCGAACTCATCGGGAATCTCTTCATAGATTTCCAGCTCAGAGTATGAGGATAGTGAGCCGTTCTGT  
GCGTCAGTGATCTCCGTATTGATGGCCAGTAGATCACATGAAGCATCACCGTTTGCGAGCGTTTTTCGATAGATCACCATTTTTCTTTATCGTGCCCACT  
GGAGAGGAGTTGGCGGAAGAGCCGGCAGAGGAGCCAGCAGGACTGCCGCTGATGGAGGAGGTAATAGTGGAGAACAGTTTTCTGTCTGCAGGTA  
CTGAGGGACACAGATCACCCATGTCATCCTGGTGCACCTTCAGGCAGTGTGCAAGCCAAGTGCCATGATCAATTCTTAACGTGCCACCGAGCTCTTC  
AGGCAAACACTCCTTCGGTATGTGTTGCGGTAGTTGGCTAGCGTTGATCATATGAACTCGATCACGCAGTTTCTCACGAACAAAAAGTTGCAGTATG  
CGAAACGGTGCTTTGAACCACAGCGGCGCTGTTACGATGAGCACCTTCTTCAGCCGTGCTGGATAGGCGCCCTTTAGGAGGTTTAATATCTTCTGAG  
ACAAGTCATAATCGAAATTGGTATATTTTGAGCCAGTCATGTTGTAGATGAAAATAATTCCGTTTCGTTGAGTATCGTAGTCATCGAGGGCCACATCAA  
GCTGGTACACCACGCCTTGAGGTGTCGTCTGATGTGTCGTCTCAGTGGGAGAATGTTTTCCCGCAGAAAACAGTGCGATCATAGACCCATTTTTATC  
AATTGCAGGCAGAATGGTAAACTTTCCCGTTTTCTAGTTCTCGCTTCAGAGGATCTGTATGGGGATCAAACCTTGACAATACCTTCTCTTATCCGTACTGT  
TTCATGTGACTGGTACAGTTGAAGCGATCTTGGCACGTCAAACCTTTCGAGCCATCAAGAATTTCAAAGCAGAGCGTGGCAGCATTTGCTTTTCGGCA  
TTTTGATTGCGCGATTTGTTTACAATGTCGAGAAAGTCGTCCAACGCCTTTTTCTCAATCGGTGAAAGTAAGTTTATGTCCATGATATGGCAATGCGT  
ACAGAGGAGTAAATAAAAGTGATTCCGATTTTGTAATGTCGGGGATGAAAAGAAGAGTGAAGAAGCCAGTGAAAAGCCGCCGCTGACATTAAG  
AATTCTTTAAGTAAGTTAATGCGTGATTGCAAGTGGAAAAGTAGAAGGTTTGAGGAGTAGTGCCAA TGACGCGGTTTCAAGAGATAAAATCGATTTA  
ATTGTAAAGTGAAACGGTTTAGCTCTTATTCTTTTAAAGCGTTAAACCTTCCGCCTAGCTACAGTTGGGGTGATGATGAAGAGTTGCAGCAATTATG  
AGGAGAATTGAATACATTTTAAATGAACCGGAGAAATGTGGCCTTTGAGTGACGGAACCTTGCTTCAATGCTTCAACGTGTGCGTTTGAGTTGAATGG  
AACACCTGAGTGCGTTGACTGGGCGCAAATCGATTCAGGTGAGCGGCCTGTGTTGTTGGTAGATAGGACCGGGGGAGACAGGGAATGACAGCAGG

TGTTGAGCGATGTGCTAGAGCGTGGCAGGCGCAGAGGGCCTAGGTGCCGTGCATCGGTCCGTCATCTCGGATGCAGCAAATGAACATCTGGCGCT  
AGGGCCGAGTAAGAGTAAGGCCAGGCAAGTACCAAAAACAAAACATTGGGCGACGATGTCTCCTCTTTGTGTGCCTCTCTCTCCCCTTCTTGAGC  
TGATGTTAGCTGTTTTCT

> Cb\_clean\_k141\_20910

GAGACAACACGCACATACCATTTCGATGCACCTTATCAAGTGCTGAAGGACAACATACAAGTTTCAAACACCCATGATATCCACATATTGACGTATGGA  
CATTTACAGTCAAGGTTGTTGGATATAGACAATGAACGTGATCGTCATCTTTGACGAGTTCCACGAACAACAGGGTGAAATGATCCTTGGACTCGAT  
AAGTGCAAGGCGCCAATCTTTCTTCTCTCGGCCACGCCAGCCGAAATACCATCTCTGCCCCGACTCCTCGCCATGCCATGCCATTTCGATATGTATTTCGC  
ATCACCAATGTCAAAAACACTACACCAGCAAGAAAGAAAAAAATTCTCAACTCCACTCGCTAAATCTCACGATCGCTGTCATAATCGTCCTGCGGCTGC  
AGCAACCGCTGCTGTGGCCTCAACGGCTGCCACTGCGGCAGCTGCTGCAGCTGCTGTAGCCACAAGCACAGCTGCCGGAGCCACCGAAGCAGCTG  
CTGTGGCGGCAACCGCGGCCGCGGCAGCTAGTGCGGCGTCGCTTGAGAGTGTTTGGGTTACGTTGCCAGCGTTAGCGAGGCAAACAGCGCTTACA  
GCGGTAGCAGCCGTGCTCTTTATGGCATCTGATGTCTTTGTGGCCCCGAGAAAGGTTTCGTCAAAGCGGGCTCAGAAAATCAAGCCATGGGATTACCCC  
TTTACTTTTGCTCTCAAC

> Cb\_clean\_k141\_35224

GTGCAACCCGTTGTCTCCTTCATCATGTCCACAATCGAATCGGCATGTGACCCGGAATCGTCTTCCAACCGAAATCAGCAGGTTCCGGAAAGAAAG  
GTGTGGTTTACCCGAGCCACATCTATTCCAACATAAAGCTGTGCGGGAACACTTCAAGGTCCCACAGCTCGCACCCCTAGGCTTGCTCCTGGAAGTC  
CTCATCTATCGCCATAGGGACTTGAGAGTCGCTCGGAAAGGTATCTTGACTCCGGCCATGAATGGGGATGTTGCCAGCGCTTGGGATGCCTGAGGCA  
GGACTGACATCCGATACAAGGACAAGGACAATGTCCCGTATCATGTAGCATTTGAGGCAATGAACATGCGGATGTTGCGGGGGAAGTGAACATCTA  
AGTACCCAGAGGAAAGGACATCAAACGAGACTCCGCTAGTAGTGCGGAGCGAACGCGGACCAGGCCAGTGGCTTATGTGAGTAAAGTGGAACAAT  
CTGGAAAGGTTGGCTAGAGTGGGTGATA

> Cb\_clean\_k141\_48216

GGAATACTCGTGTGCACCCCTTACGTCCAAACGGGTCTGGATATAAAACCACCACCAGATCTTTTGATCGATTGTGGCAAAGACTTCGTTTTGGACA  
AAGGGCGTCCAGTATTTCCACTTCCGTGGACAGACAAGGACATAAACCAGCAGAGAATTGGTCGTGTTGGAAGATTAAGACCCGGAATCGTCTTCC  
AACCGAAATCAGCAGGTTCCGGAAAGAAAGGTGTGGTTTACCCGAGCCACATCTATTCCAACATAAAGCTGTGCGGGAACACTTCAAGGTCCCAC

AGCTCGCACCAATCTCGGGTGCTTTCACGGCAGATTTGCCTTTCTTGCGACCGAACAAGAAAGTGCTAAATTCTCTACCCGTCGAAAAGTCAGTTGT  
TTTCATACATTCACTTGCTTTAAGTGGTGTTCGCCAAGAGCAATGGCAACACATGTATACGAGATCCGTGCAAGGGCACACTCTCGGCAACGACTAC  
AAAAACGTAGATAGACTGCTTAATCATTCAAGGTACAAGCGATCAAAGCTAGTCTCCTATGGAGACGCGCTTTATCATCTTTACCGAGAACACGCAG  
TCCAGTACGGATTTGTCAAAGAAGACGGAAGCACAGAGTACAAATCTGTCAAGCCAATGTCGGTCATCAACGGAAAGTGGATAGAGTTAGAACAAT  
CGCCGACGACTAAGATGGATATTCAAGAGTTGCCGCAACAGGAACTTTCAAACAAATATCAATCTTTTGAATCATCAATAAGGCGATGTCGAGACTC  
CATTCTTTTCAAAGCCAAGGACATGCCTGGGCATGACTTGGAACGTCTCAACTCCATCTTAGCGTTTTGAGCACTAAAAGGCGGCACCTTGAGCTGC  
AATGCTACATTTAAAGACAACCGCAGTTTTGTGTTACCCAATTGATGTTTGACTTTTGTGAGACACGCTATTTCTGTTGTTGCCTCCCGACCTCTTTTCG  
TGACATTTGTGACATCCGTTTCGTTACCTTTCTTTCTTTGTTTCATAAAATACAAACAAACGCAGCGGCTAATGCCGCGGTAATAAACCGGATTCACATG  
CTAACGCATGGTGTGGTTGGCCGTTTGCCAACGTAATCACCTTGTGACTTGGAGACGGTCCATTCCAAGCTTCGCATCATACGCAGTCTGTTTCACA  
AAACCAGGATCGATAACGAAAAAGATGCCGTCGATTGTGATACTTGTGATGCAATGTTAGTGGCGATGACCACCTTCCTACCACCAGGAGGAGGTG  
GCTCAAAGATCTTGGAAGCAATCTCAGATGGCAATGCACCGTAGATGGGCAGGATGACGAGCTCGGGCACAGAAGGCCCAAGTGCTTTCATGCGCT  
CGAACAAGATCTCGCAACTGGTGTGATCTCTTCTTTGCCAGTTAAGAACAACAGTATGTACCAGGCTTCTCAGTGAGATGAATCTGCATCACAGT  
CGTCAAAGCTGCATCCAGATAATCGCTCTCCGGCTCCCGACTGTACATGATCTCTACTGGGAATGTTCTGCCCAGGAATTGTCAAGATCGGGCATTTCGT  
TGAAATATGTAGAGAAC

> Cb\_clean\_k141\_31123

TACTTGCAGAGTTGAAGCTGAAAGTGCACTGTTTTTCCCCATCCCGGACTTCTGGTCACATGCAGAAGTTGATGGATGGCGTGTTGGCCCTTCGTTCGC  
TCTGGTCAGATGACCTGTGTCAAGAAGGAATCTCCGGCTGAGTTCGCGCGCCGTAAGTGTGAACAGAAGTGGTCTTGGCTCATCAGGCGTCTGCAG  
AGGCGTTCAGCTGCTGAGCAAGCTGTGATCGCTGAACAGCGGTTAACAAGGCCCTGCATTTGCAGGCCAATACTTCTTTCTTCGTCCCTACTGGGC  
CGAAGGGTTTTCAAAGGTCTGGGAGAGTTGGTACTCCCTACCCCTTCTGCTGAAGAGATCGCTTTTGGTTCTCTTTCCTAGATGGCAAACGTGTTTCG  
TGTTTTGCCAAAGAGAGAGAAGAACAACACTCGGTTTTCCGCTTGGTGCCAGTCAAATGCCGAACGTAAGAAGGCATTAAAACTAGCCGAGCTGGAAC  
GTCAAAGGTTTAGATTGTCCTCGTTGGTCGCTGATCCTCTTCGTGTGCTCGGATGTCAAATTCCTGAGACATTCAGTGGTGTCAATTTCTTCGCCCCGT  
GGTCTTTTTGGCACTTCTTCACGTCGCTCTGTGCTCCGAAGGGATTTTCATCCATCGGGCTAGACACGCTGAGAGGTTCTTCTTCTGTCTGTCAATGG  
TTACATTATTGATCTGGTCGGGAACAAGATAAGGGTGTCCAGAAATAGGGCGGGATCTGGTGTCTCTTTTCGCATTGATGGTGGTCAGGTCGCCCCACT  
GCGGCCTAAAGGACGAGTATCTTTGTGAGTTCTTCAGTCCAGGCTAAATCTCATACCAAACCTGGCGAGCCGGAGCTCCTGACTATCGAACTGTT  
TCGTTTCGAGATACGAGGACTATTTCCGGGAGGTTTTTAACTGAAATGGACGGAACCAACCTCGACTTGTGGTCTTTAATGACCATGGCCAAAAGGTGG

AAAAGAGATTTTGGTTGCCCTGGCAACACTTGCATCTTGTCTTTTGCGGGTGATTCCGGTCTTGTTTACTGTTGTTAACGAACAAGACGATCTGCCGCC  
GGCTTTGTGGTTTCGCCCTTGATGGCAAAGATTTGTTCCACTGCGGCGTTGACCAGGTCAAGAGACTGCAGTTCCAGAAGAACATCTGGAAAGCAGT  
TGCCAAGATGGTCATCCAGGACGGTAGCCCTGCTGAACAGCGGTTGGCAGAGAAGGTCTCCTCCTCCGCACACGTGAGTGTCCCTTGCCCTGAAACC  
TAACTTGTTCCACCAGTTAACAAACGGTTTCAGGGTCTGCGCCAAGTTCTCCGGGCTCAGCGTTTTTGAGCGCGGGCTCGACTTTACACGCCCTGAT  
CCTCGGGTCGAAGGCGGCTTCATCACAACCAGACAGGAGAGGTTGTTCTGGGACGTAGGGGCAAGCAGGTTGGTGTTTACACCAAAAAGGCCTGGC  
AAAAATATTCTTCCGCAAGCACAATCAAGAAAAATGGAGGATAGCTTTGGCTGCTGCGATTGGTTTGACCTATGATGAAGGTCTGCTTTTCTTTTCAA  
AGTTTCACAATGATAACACGAAACCAGATGTTGTGTTGGAGACTTTGGGTTTCGTCACCCTATCACAAGCCAGATAGGGAAACAGTGACAAGAGTGG  
CTTTTGTGACGTGGAGAAACCTGTCGCACCCAACACTACGCCTCAGTCTTCCACAGTTGTTCCGCCTCCGCCGCCTCCACCGCCGGTGCAGGAAG  
TCAAGCAGAAGAGGAAGAAGACAGAGTTAGCTGATGGTGACACGTGGCTTCTTGCTGAAGGTTCTGAGGGCAAGTCAAACAGAGCTCGTTTTAGA  
TCTCTCTTCCACATGATTGGTGGTTGAGGGTGTCTGAGAGGGTTATGCCTTTTCATGAATCAGGATGCGTCTCGTGACGTCCGGGTACAGATCCAGATC  
TTGGTCTCAATCTTCCCTGGTTTCAAATCCTTCAGAGAAGTTTGATATAAACACGGTGAAGCACACACCTTCTAGTTCTTCCAAGGCATCAGGTTCAA  
CGCCTTTGCGGGTTGATCCTGAAGCTTTCAAGAGACAGCTTCAGGCTAAAGCTAAGAAAGTGAGTGCAACGTCGTCTCTCCCGTCCCGATGCGAGGG  
AGGTGTATCTGAAGGGTGTGTTGGTGAGTTCAAACCGGACAAGGTTTCTCACAGAAAAGCCCTTTCTGAACCTACTCCGTCGAGGAAACCTTCCTCTG  
AGTGGATGTCTATCTCTCGAGCATCATCTGATTATCTGTTTCGATGATGATCATGAAGACGCAAGAGATTCGACTAGATCAGACGTTGAGACTAACCCT  
GGACCTTCGATCAGGCATTTCCGTTCCAAGTCGACTTCAGATTTGGAGGGTGAAACACCGTCTCTCAATTTTACACCACCTACCCCTGGTGATGTCTT  
GACTGTGCACCATCCGACTCCACCTCGTTTGAGGGTTAATCACAGGATGAATAGACACACTGTGATTGTTCTTCACCGGGTGAAAACACGTCTGAAT  
TGGAATGTTGGTTACTCGTCATTTGCGTGCCCTCCTACAGAGGAGCATCTGGAACCTCGAGACTCCAGAACCGCGGATATAGAAGAAAATCCCGGG  
CCAAGTGAAACCCCTTGACCCCACTTTGCCCCAGTTCCGGGGTCGAAGTGGTTCACGGAGTTCAATCGCTGTTGCCACAGTGGAGCGATCACCTCT  
AGAACGCGTAGGTTCTTTGGAAAGATCGGCATTCACGGCAAAAGCGTGACGGAAGAAGTCAAGGACATTTTGGATTCAAAGAACATGACGAGGT  
GTATCCTTACACTGGCAAAAACCTCATCGTTTCGTAGAGAAACATTATGAATTCACCTATGTCTTTTCTCATTTACCTAAGGACAAGAAATGGCGGTCTG  
CAACCTTTATTAGGTGGGTTGCCGCTGCTTCTCTGTCCGAGCTTCAAAAATCACTTGACTGTGTAGTGAAGGCTTCACATCCTTTCAACACCGCGCTT  
GTGAGTAAGCTGCGTGATGAGACGAACTCCTTCTTTCAGAAGATCTCCGATTCTGAGCCGATAGGTGGTACGACCGTATCTGCCTTAGCTCATAATT  
CAAGACTCTGTACGCCTGCCCTGACAAATGGGTGCGGTTACGCACTAGAGATAAAACCAGAAGATGGAATGGTACTATTTTCAATTTGACTGAGTCTCCA  
GACGAAACCGTTAAAAACAGGTTGTGGTGGGTTTTGAATGGGAATGAGATTTTGCATGGAGGGGACAAAACCCCTGTTTCCCCAAGCACCGTCTCA  
TTCGGTTGGCTAGCGAAGGAATATTCGACACATGAGGTGATCATCGAGCCCAAACCGGACTCTATGCTATCACAAGAGAAACCGGGGCCGTTTGCA  
ATGCCCTCGCTTTCTCAGTTTCAAAAATGTGTCGACAAGATTATCCCTTCTGGTAGTCATTTCTCTCGTTCTAAAGTCGGTGAACCTCAAAGATCACAT

CAACCAGTACCTGGAATCTACAGATGTCAAGACAGTAGATCCTGTGTTGGTCGCGGCGATCGCAATGAGTTTTAAGTCGAAATTCAATTGTCCAAAA  
GAAACCAGCTCTTTCGCAATTGATTTTCAGACTCGACCGAAGAATGGTTGTCTTCTGTGCCACAGATTCCCCTGAAGATAAGAACAAAGGGAAACTC  
TACTGGTGCATCGGTGGTAGTGTTATCGTCCATGGCGGGTTGTTAGGCATTGAAGATGGGAAGTCTTGTTCCCCATCGTTAGATCACTATAGCAAGTT  
ATGGACGATGCCACTTCCGAAATCAGGTTGGGTGGACAGATCTTTTGAAGCTGAATACTTCACAAAGATTTCAACCTGGCAAAAGGCCCTCGATCG  
GTGTGAACCGATCGTTGTATTCTCTGAACACACATTGCAACGCACACTCTACCAGTATTTTGATGGTGTGACAGACAAAGTTTTGTCCCCATCACATA  
CTGCAATTGTTGCTTGTGTGGTAAAATCCTTGATGAAATGCCCGGAGAACGGGATGGGATATGCAGTGCAGTTTGATAGCCATGGGGCTTCACTGTA  
CATATGCAGGCAACCGAATTCCGCAGAGGGCGAACCGGTTGTGGTACTTTTCATTGGGATTTCCCTTTCGTGCACGGGGGAAGAAAATCTTATGCTCCA  
GAGCCTAGGCGGTTCTTTTATACTGAGCATCTTAACATAGATTATTCCATACCCATGCATGAGGTTTTTGTGGAAGGATCTACCCAAGTCCAATTCT  
TCGCATTTGACTGTCAAGAGTCAACAAGAATTGTATTTCCGTTTTCAACAACAAATTGATATGTATGATGCGCCAACACCGGCCCTTCATGCATTCAAG  
AGCACATGGCACAGCTGAGCAAGCCGTACGTGACACCGTGCCCAAGATGAGAACTTCCAGTTCAATTTTGAGCACATTGCTGCGATAGCCATGTG  
TTATAGATCCAGGATGCAATGTCCATGTCCGGAGTCTGCTATGGCAATCGATTTTGACTTCGCCAATGAACGCATTGTGTTCTTTTCGAACCTAGGCA  
GTGGGTATTTCCGCTGTGCGGGGCCAAATGTGGTGGTGATAAACGGAGTTGGTCTGATTCTACTGGGTGAGTGTTCACACCTACCACAACCAATC  
AAACCAATCTCGACCTAGTCCCCGAGTGTGTAGGTACTGGGACGAGATTGCTTCTTTTCATTTGACCGAATTCTGCCAACCACATTGGGTATTGGA  
CATCGGATTTTCACCTGCAACCTGACAAAGAGGAACAGTTGCAGAGGGGCTCAAATTGCACTGGACGCACATAATGATCCTGTTGAGCCTTTCAGCA  
GGGACATTGCAATATTTTCATGCGTTTGAAGCGATCAGACAAACGGCCCAAGCGGTCGATATAACTGTCATGAAGATTGAACATTTGATCGTCATGGCA  
TGCATATATCGTTTCGAAAATGGCGTGCCCTACACCAGGCACTTCAATGATTGTCCAGTTCGATTTGTCAAACCAAAGAGTGAGGTTTCGGCGTTGCAA  
GGGGAACACATCCGGAGTTGGATGGCAGAATGTGGTGGTATCTGCACGACGATTGCATGATCCACACTGGTAGGCCAGAAAAACCTCACACTGGTG  
AGGTTGAAACTCCGTTGCCCCTCAGCAGTCGGTTTTCTTTTCGTGCAACTCATCGTCAGGCCAAGGTAATGGCCAACGATTTTGAAGAGAAGTGGA  
GAGAAGACTCCAAGTGCAGAGCACGGACATGGCACATCGAAGGTGATGACACACCGAAGCAAAAGCTTGCTCGGTCCCATCACCTTTGTGGTGT  
CCAGACACGTTCAACGAGCGGTTTCGACGAGATCTTCGTTGCCGCTTACATTTGGTTTTCTTTCAACTCATTTGCACGTTTTATTTTTCATTTTCTCGA  
CCAAATCTTCGGCGAAAACCCGACAAACACACAGAAGGAGGAGAGCATCCTCTTGAGATGAGAGTTTTTCTGCATCATCCTCCTTGCTTGTGTGC  
AAGTTAGGAACCAGAGGTGACCAAGTCCCTGTCGATTATTACGCGAACGTGGCAGCACACTATGGTGTCCGCACACATTCGCACGTGTACAAAGAC  
GTGACGACAGACGATCTTGAAAAGATGAAAGTTGGAGACTTTTCATCTAGTTCCGCTGGTTATTTGAATCTTGCGTACGCTTCACAACCTTGGTTATAA  
AAGAGTGTTCACCCCGCATGTGGAGGTAGAACGGTCCCAAGGTGTGAGCTATACCTTGTACCGAGTTCAAAGTGGGTGGAAGCAACAAGGTTTCAT  
TGATGATTGGTCAAAGGTTTTCTTGGTCCAATTTCTCCCCGCGTGGATAGCCACGAGGGTCACTGCTGTGTATGTGCCAACCTTTAGGATTGGTGCAT  
TGTCCGGAAGTGACATCCCGCGTTCTCATGACGGGCTGAACCTGCTGGAAAAAGTAAAGAACACAGCGAAGTTTCGATGAGGGTTGGACATCTGGC

AGCTCGTCAGTTTCAGTAATCCCTGACGAGATCAAGTTGAGATGCCCCGAAATACCATCGGGTAACCATCTTGAAATACTAAAGGATTACAAAACGG  
TGCACATTCATGGTGGAGCCGGTACTGTGCAAACCTGCTATTGCTTGCGGCGCACGACCGGTCATCCACGACAAGACACTCGATAGAGTGTATCATAC  
GATGCCTGAGCCAAAGGATTTCAAACAACCTTCCATCGGGAAGTTTCATGGGTTGGTTGGTATCCGCCGGTTTCAACGTTAATGCACCAATAGAGGTA  
AGGGCGTGGTGGTTGTTACAATGGTATTGGTCCCCAAAAGTGGAACCTATGCGTACGACGCATTAGTTACACTTGCCAAAGCTTACACCATATCATCGTA  
TGTGTACAATCATTGGGAGCTCTTCCTCATTCTTTTCTTCACCGTTCCGGCAGTGGTCTGGAGAATGTTATTCTCTTCCAAATCATTGTTCTCCATAGTC  
AAAATTTGTGCGCTTGGTTTCTGGCGCTATCCTGTGTTGTGTTTGTAGATTCGAAAGTCACGTTCTGTGGCAGGAATCTGGTCAATGCAAACTTGTG  
GATGGGCGCGGCGCAAGATTTGTCTGCGCTCATGGAGACACGATCTTCACTGGTTTGGGAGCCAGTGCAAAAGACCGTAGGAACGAAGAAGTTGA  
CGTTCCTTTTTCCCCTTGGGCATTGGAGCATGAAAGACAACCAAACCTGGTAAATCTACGAAGGTAGATTTGTCTGGTCCCTCCGAGACTATTGGAGG  
GAACTTCCGCCTTGTAGCACCACCTCGTGAATACAAGCGTGGATTAAAGTCTTTTCTGCCCCCTTCAATGTTGGCCATGCAGAATCTCTTGTGAAGG  
CCCAACACGTAGCACCATACTCATCTTCACATAATTGTGTGACTATGATGGTGCAACTTTGTGCCAAGAGATCAACTGCATGGACAGCATGTATGGTG  
ATGGTGGGCGCCTTAACGGGACTTGCCCTGGCGCCGCCAAAACCTACTCAAGGACATTCTTTCTTTCTTTTCCCTGGCAAGGATTTTGGCAGTACTC  
CTTTTTATCGCTCGCTTGGCTTTGCCGCGTCGTTAGAAAACATCCCATTCGAGATAGAAGGGATGGTCGAAACGACAGAGCCAATGCCAGAGACAGC  
TACACCTGAACCGACAGATCTGGCGGATCCAGATTCATTCAATATGTTGGTCGATGAGATAGCGTTCATCCAGGCATGCGTGGAACAGCTCAAGATA  
CCTACCTTGGACAAGGAGGCATTTGATGAGGTTTCACAGCGAACTTTGCAAAAGGAGTTGGACAAGGTCGAAATCCCTGAGGATTCGTTAATCAGG  
GTTTCCAACATACCACCGAGAGTGCATGAGTGGGCACAATTGGTGGATGGTCTTCACCATGCGATTTCTTTCTGTGCGCACAAACCGCGTTGCTG  
ACGCATTTGTGTTATATGTTAAAAACGCTGGTGAAAACATATATGACTTTGTCCAGCCGATACTGGAAATCCTTTCTTTCTTCTGCACCTTGCAGCTG  
AGCACTCTAAGCATGCGTTTCGATCGCTGTTTAAATGGCTTTGCGATTTCTTAGACCATGTGTGGGGTCTAGAAGCGTCAAAGAGAGTCAAAACAGT  
GTGGGGCCTGACTGGCCTTCATCGAACGGGATTGCTTGGTGTAAGCCAACTTGCAGCCAACGTTGCTTATTCTGATTTTGTAGGTAGACAAGAT  
TTCGAATCAGACTACAACAACTGGTGCAAGAAGGCAAGCACCTTGCTCAGGTGTATGGTGCCGTTAAACGATCAAACCTTGGAGGGCCTCAGAG  
GAGGCCTATAGGTTATGGAAAACCTCTAATGTCACAATCGGAAGCCAGTCTGCTTGGTTTTCGGACCAGACGAATTTGTGACTGATCGTGAGTATGAG  
GATCGTGTGCAATCATACCTTGAACAGGGTGTTGCACAAGGTGCTGACGGGGTATTTTTGGCAGACAAGAGACCGGAGCTGATTGCCAAATCACAG  
CACCGTTATGAACCAAAGTATCCCGCACTCACTTCAGAGGATCGTTCCATGGCCAAGGAGATAGCCCAAGCCATGTTTGATCAATATCCGGAAGTCT  
TCGCCAATTGTGACGTTCTGCCACCAAGGGCAGTCCACAATTATGTGAAGCAAAAGTACTCTCCAGGAACCCCGTTCATCAAACCTGGAGGGCTTCA  
AATCTCGTCAAGCAATGTTTCGACGCTGGTTATGACCGCGTCATGCAACGACGAGCAATGCATTACTTGAAAACCTGGTGAATATCCAGTACAATTCTAT  
CACGCTTTTGTGAAGTCACAAGTGGTAGACATCAAGAAATGCTTGAGCCCCGAGGAAGGTGGAAAAGGGAAAGATGTTTCGCACTGTGGTCAGCCA  
AGACCTGTTTTCTATTACATTGACCAATGTCTCCAGATCGAGCGCAACAAACGCATAAATTGGGATACATATGGTGCAGGTATAGGTATGCCTCTCA



ATCAATCAATGGAGGCAATATACAGTAGAATGGCAGCCGCACAGAAATCGAGAGGAGGCAGATACATCATCGCTGATGCAACTGCCTTCGATTTCGTT  
TTGCAAACCTTTTCCTTTTCGAAGTAAACGCAAATCTTTGGGAACTTGTTTACAAAGATCATCCAAGCGGTAACGGCAAGAACCCTCGCATCTGTTCTA  
AATGCGTCGTATCAAGCCAGACAAAATGCGTGGATAATCGGTGTGACCGAGCCGGAGTATGACTCGTTGACTGTTTTCGCTCCAAGACAAAAACAGT  
CGCGAGCTCATACGGCAACGATCCCCAAAGACGGTAATCTGCTTGGAAGATCTCATAGACTGGGACAAGTACAATAGATTGCCTGCTGAGCAACGT  
GCGAATTACGTTGCAAAACTTCAACCACCTGAAGGGAAGACGGTGGTAACCTGGGATCCTTCTCTCCGCCCCTCCAGGTCAAACCTGGATGGGTAAA  
TATGAATATGGTGTCTTATCTGATGTTGACAAGAAATTCTTTGAACATCAGACTTTCACGTACGATCCTTCAAACCTTTGAAGACATGTATCAAGACATA  
TTATCAGTTTCACGGTCAAATTACAACTGATGTCAAACGTGCATGCGAAGAATCGTGGTGGAAAGCACTGGAGGGTCAGATACATCAAACGTTAATA  
CACACGCTTTCAAGGCAGGTGTGATTTACGCTTGGTGTCAAACCACTGGCAGAGCTCCGAAGGAGTTCTTCCAGTACAATGACCTTGCCAACACAT  
CAGATGACACCATCTGGCAATCGGGTGGCAAACATGGTCTTAACACTGTTGAAGATGTGCAAGTTTTTCGGCATCACTGTCAATCAGTGGGCATCCA  
TCTGGAGATAGAAACGACGAAGAATATATCACAAGTAGAATACTTGTCAAATTCGTTTCGCGTCCCTACTGCAGAAGATTCAGCAGCATTGAAAAGTC  
TGGAGATCCCAGAAAATCAAGGCTGCTTCAAATGCCACAAGCAGTTAGGCCTAACTGTTCCCTACTTCGTGGGAACAGTTCAACAACCCACAGTTT  
GTCGTTCGTGCAAAACCCTTCTGCGATCTTGCTCCGAAGATCTGCGTTTAGATATTATCAATCTAACGCAAACCATTGGAAGTATGTTTCAGTAGAGAG  
AGGTGCCGGTCATGCTCAAAGCACCGCCTTCCTACCTGAACTATATGGCAAGTTCGCACAAGAGTGGTGCGACGATATCAACGATCTTCTGGTGCAA  
CAGAAGATCCATCGGAAGTTCAAGGTCACAAACGGTCAATTTGGACTACAATGCGTCGAACAAGTGGATCCGAGAGCGTCGCAACAACAGCTCTC  
GCCACGTCAAGTTGCTTTCCTCTCGTGGTTGAGAGGAAATATGTTCCCTAGTTACTACAGGGTACTTGACATCCACATGAACGTCGCAAAAAGTAGAT  
CCAGAACGGCACGCCAAGTTCCTTCGTAACTTGAGAAAGGTTGGCGAGGTTGGGAAGAACTGTTACGTGAAGGAGTAGATAACCTCTACGCCTTA  
ACTGATTCCATTCCAGATGAAATCAGCAAAAAGTTTCAACCCGGCCTCGATATGCTCTATGCAGAGCAACCGTTCTACACGAAGAACAAGGTGGTCG  
AAAAGTTTGTGTACCTAAACTTCTGGAGGAAAGCCCAGAGACGGAGGTCACATTTTCAGATTTCTCTGCTCGAATTCAAGAGTCACCATACGCATC  
GGTGTGTGACCCCTATCACTTCTGGGAGAAGTTAGGGGAACCTGAGTTCAAAGAGCAGCTAATGACTGAAGATCCTCTGAAGATACAAGGTCTCGT  
CTTGCTTATAAGCACCATGTACCTGTTAACAACACAGCTGAGTCAGTGGTGTGGCCATTCTTTTCGTTGGTCTATTCTACAACTCTTCCTGTGGT  
CCTTTATCGGACTCAATAAGGTATATGGGCTGTTGAACACTATGTACTGGCATTCCGAAGGTAAATCGTCGAGAGAGATATCTCGGATAATGCCTCGG  
GACCCGTACATGGTGACAAAACAGTTTGCTGCGTTTTGCATCGACTTTGTACCATCACAACCTGGGTTACTTGGCCCTCATCCCGCTGCACATATTATC  
CTTGCTCCCTGTGCTGTTTCGAAGCACTTGAAAAAGCATGGTATGTGGCAGGGGAGGTCAAGAATGTGATGGAACCCCTGGCAGCACCGTAAACAA  
GTGGGACCAGTACGCAGACGAGTACATACAAGCTCTGCGCTCTTCTCCCACTAACAGGAAATACGTTGCTGCCAAAACCTTCAACCGGCAATCGAC  
CTGGTTTATAGCTGCCCTATGGAAAGCTAGACACCGCCAGAAGGTCAGGAAATTTTGGCTTGTGCAACCTCGATTGGTTTTGCGCGACAATACGCAC  
ATACCATTTCGACGCACCTTATCAAGTGCTCAAAGACAACATCCAAGTTTCAAACACCCACGATATCCACATCTTGACTTATGGACATTTACAGTCAAG

ATTGTTGGATATAGACAATGAACGTGACATCGTTATATTTGACGAGTTTCACGAGCAACAAGGTGAAATGATTCTTGGGCTTGACAAGTGCAAGGCG  
CCAATCTTTCTTCTCTCGGCCACGCCAGCCGAAATACCATCTCTGCACGGTTCCGGAACCCTGGTTCCGAACATCGACAGACGACATCCAATCCAGA  
TCCACCAAGTGGATGACGGAATGGGTGTTGTTGACATGTTTCATGGAAGCCAGAAACCGTTACCCGGATTTATGCAAGAGAGCGATGATTATTGTACC  
AACCACAAAGAGGTTGCAAAAGTTATCGCTTCCCTTGATTATCTCAAGGTAGGCAAGGTGTCCCTCTGTCCGCACGTGATCGCGTGGTACAGGAG  
GAAGGAATACTGGTGTGCACCCCTTACGTCCAGACGGGTCTAGATATAAAACCACCACCAGACCTTTTGATCGATTGTGGCAAAGACTTCGTTTTGG  
ATAAAGGGCGTCCAGTATTTCCACTCCCGTGGACAGACAAGGACATAAACCAACAGAGAATTGGTCGTGTTGGAAGATTAAGACCCGGAATCGTCT  
TCCAACCGAAATCAGCAGGTTCCGGAAGAAAGGTGTGGTATACCCGAGTCCACATCTATTCCAACATAAA

> Cb\_clean\_k141\_49715

CGTATGCTTCGGTGTGCGACCCCTATCACTTCTGGGAGAAGTTAGGGGAGCCTGAATTCAAGGAGCAGCTAATGGCTGAAGATCCTCTGAAGATACA  
AGGTCTCGTCTTGCTTATAAGTACTATGTACCTATTGACAAACGCAGCTGAGTCAGTAGTATTGGCCATTCCTTTTGTTGGCCTGTTCTACAAACTCTT  
CCTGTGGTCCCTTCATCGGACTCAACAAGGGCAACTAACACCACTCGACACTGCACGACCATGTTCAAGTACGTAGTGTTCGCCCTCCCTTCTGGCCAT  
CACCACCGGCCAGGTGCTCAAAATCTCCAACGCCATCGTCGGCTCTGCTCAACCAGGAGCTGAGCAAATCATCCAACCTTTCTGGAGGTGGTGGCGG  
CCCTGGTGGTGGCCGAGGTGGCAGCCGAGCTTCGGCTGGTGCCAGTTCTTCCTTTGGCGGTAGTTCGAGCGGCCGACGAGTTTCTTCTTCTTCTGGC  
GGCGCTAGCTTGAGCGGTCTTTTGGGCGGCGGCAGCCTTAGCCGAGCATCGGCCGCCCCGGCCATCACCTCGGTGGTGGACAAAGCACCGCCGG  
CCTCGGCAACATTGTCCTCCTGCTGCCTCCCAGTGCCATCCGAGCTCAGGCTGCCCCCAGAGCTCAGGCTGCCCCCATTTCATTGCCCCATCTCGTC  
AGGTGTCCCTCACTGGGTGGACTTTCCCTCCTCCTCCCTATCTTCAGGCAGTGGTTTCGCGCCTCTCCTCCAGCGGCAGCTCCTCCAGCTCCAGCGGTGA  
AAGCGAGAAGCCAATGCCGTACTCGTTTCAGCTGGGAGTCGGAAGACGAGTTCAAGACTAAGCAGTCCCGTCAAGAGACGGCTGACGAGAAGGGC  
ACCGTTACCGGCGAGTACTCCTTTGAGGCTGACGGACTGAAGCGAACGGTGAAGTACATTGCTGATGAAAACGGCTTCCGAGCTCAGGTGGAAAC  
CAACGAACCGGGAACCTCTCACCTCAAACCCAGCTGACGTGGAGATCAAGTCCAACGCAAAACAACCTAGACAGCCAGGAATAGTTCAAATAATTTAA  
AACAGTTTATCATTTTTTTAAGCTTTAAAATACGTAATTTCAAAAATTTTTTCAACAGTTTTGCAAATTGTAAATAGTAAATTTTCTCCTGTAAGTGTAGTT  
TACCAAAATTGCACTTGCAACTTTTCTTTCTTCAAGAGCACAAGTTGTAATTGAAGACTTTCGAGCAATCGCCTTCTATCTTTACACATAAACGGTAC  
CCAGTGTGCACAGCAAACCTTGATTATTTTGTACAGTGATAGTCCCAGCCAAATGCCTAAAATGAGGTCAATTTAGAAAAACCGTTTGCAAAACGTTA  
ACTCAAAAACCATCTCACCCAAATGACCGCCAATAGTGCCTGGTTAGAATTTACTAAAATTAGTTATTTGACTTTTATACCTTTGGCTCAATTCACTTA  
CCG

> Cb\_clean\_k141\_56835

CTGTGGTGCTCTTACACAGGCCCTCAGGGGACATATATAAGAGATGATTGCTCCACGCTTTCAGTGGATTCCATTTGTCAAAGGTGGTTTTCTTTG  
TCTGGAAGCAGATAATTTCTGCAATCGGATCCTTGCGGATCGCGGCACGTGCTATGCCGAGGCCTCTGTGAGGCCGTTGCCCTTCCGGGCATTGTC  
AATTGTGACGAGGTGCGGAGCACCGAGCTATCGCGTCTACGAGTCCGCAATGACTGTAAACTATTGCAACAGGGCGGTGTCACACCCAAATGTGTAT  
AAACTTGCGCGTTTTCGGAGCGTTCTCAAACGCTGGCCTACACTGGGTAAACGGATGGTGATCAGAACGGCGATGAGGTAAGTGTGGACTAGTGACC  
CTAGAAGTTATCCACCTCATTGTGAACCATCTTCCCTTTAAGATTTAGAAATGAGCACCGCTCTAAACGGTTAACACCATTTTGTTCGGCTTCCCTC  
TGGACGGGACGATTCAAAATGTCTTCTATCAATTTTCTTCGTTTGGATCAACGCAAAGATCCCGGGAGGCTCCGAGTGCCTAAAGAACGGTCTGCTA  
TCCGTTTCATCCTATTCAAGTTCAGCCGGGACTTGGAGGCTCCGCAGGGAGTCGCTGCCGGCATGGGCCCAGCCCAAGTCTTCTCCTGTTGGTCTTCT  
CGCTTGTGGTGAGCTGACCAGTACTTCTTCTTTCGGTGAGGTGGTTCAGTCCACGCCTCGCCCAGCCACCATGGCTGCCAAGGTGGACGTTTGTCA  
AGTGAGGTACTTGACATTCTCCGACTCGTCTCAAGGAATAAAACACTGGTTGGTTAAAAGCCTGCCTGTCTCTCACCTGATGTGTTAGAGATGAGG  
TTACATGGCTTTGTGATCGCCTGGCAACAGTGAGCTCTCAACATTCTGCTTGCAGAGTTGAGGCTGAAAGTGCGCTGTTTTCCCATCCCGGACTT  
CTGGTCACATGCAGAAGTTGATGGATGGAGTGTGGCCCTTCGTCGCTCTGGTCAAATGACCTGTGTCAAGAAGGAATCTCCGGCTGAGTTCGCGC  
GCCGTAAGCGTGAACAGAAGTGGTCTTGGCTCATCAGGCGTCTGCAGAGGCGTTCAGTTGCTGAGCAAGCTGTGATCGCTGAACAGCGGTTGACA  
AAGGCCCTGCACTTGCAGGCCAATACTTCTTCCTTCGTCCCCACTGGGCCGAAGGGTTTCAAAGGTCTGGGAGAGTTGGTACTCCCTACCCCTTCTG  
CTGAAGAGATCGCTTTTGGTTCCCTCCTTCTAAATGGCAAACGTGTTTCGTGTTTTGCCAAGGAGAGAGAAGAACACTCGGTTTTCCGCTTGGTGCCA  
GTCAAATGCCGAACGTAAGAAGGCATTAAAACTAGCCGAGCTGGAACGTCAAAGATTCAGATTGTCTTCGTTGGTCGCTGATCCTCTTCGTGTGCTC  
GGATGTCAAATTCCTGAGACGTTTAGTGGTGTCATTCTTTTCGCCCGTGGTCTTTTTTGGCACTTCTTCACGTGCGCTCTGTGCTCCGAAGGGATTCAT  
CCATCGGGCTAGACACGCTGAGAGGTTCTTCTTCTGTCTGTCAATGGTTACATTATTGATATGGTCGGGAACAAGATAAGGGTGTCCAGAAATAGG  
GCGGGATCTGGTGTCTCTTTTCGCATTGATGGTGGTCAGGTCGCCCACTGCGGCCTAAAGGACGAGTATCTTTGTGCCGTTCTTCAGTCCAGGCTAA  
ATCTCATACCAAACCTGGCGAGCCGGAGCTCCTGACTATCGAACTGTTTCGTTTCGAGATACGAGGACTATTTCCGGGAGGTTTTTGAAGTGAATGGA  
CGGAACCAACCTTGACTTGTGGTCTTTAATGACCATGGCTAAAAGGTGGAAAAGAGATTTTGGTTGCCCTGGCAACACTTGCATCTTGTCTTTTGC  
GGTGATTCCGGTCTCGTTTGCTGTTGTTAACGAACAGGACGATCTGCCGCCGGCTTTGTGGTTTCGCCTTGATGGCAAAGATTGTTCCACTGTGGCG  
TTGACCAGGTCAAAAGACTGCAGTTCCAGAAGAACATCTGGAAGCAGTTGCCAAGATGGTCATCCAGGACGGTAGCCCTGCTGAACAGCGGTTG  
GCAGAGAAGGTCTCCTCCTCCGCACACGTGAGTGTCCCTTGCCTGAAACCTAATTGTTCCACCAGTTAACAAACGGTTTCAGGGTCTGCGCCAAG  
TTCTCCGGGCTCAGCGTTTTTGTAGCGCGGGCTCGATTTTACACGCCCTGATCCTCGGGTCGAAGGCGGCTTCATCACAACCAGACAGGAGAGGTTG  
TTTTGGGACGTAGGGGCAAGCAGGTTGGTGTTCACACCAAAGGCCTGGCAAAGATATTCTTCCGCAAGCACAATCAAGAAAAATGGAGGATAGCT

TTGGCTGCCGCGATTGGTTTTGACCTATGATGAAGGTCTGCTTTTCTTTTCAAAGTTTCACAATGATAACACGAAACCAGATGTTGTGTTGGAGACTTT  
GGGTTTCGTCACCCTATCACAAGCCAGATAGGGAAACAGTGACAAGAGTGGCTTTTGTGACGTGGAGAAACCTGTCGCACCCAACACTACGCCTCA  
GTCTTCCACAATTGTTCCGCCTCCGCCGCCTCCACCGCCGGTGCAGGAAGTCAAGCAGAAGAGGAAGAAGACAGAGTTAGCTGATGGTGACACGT  
GGCTTCTTGCTGAAGGTTCTGAGGGCAAGTCAAACAGAGCTCGTTTTAGATCTCTCTTCCCACATGATTGGTGGTTGAGGGTGTCTGAGAGGGTTAT  
GCCTTTCATGAATCAGGATGCATCTCGTGACGTGCGGTACAGATCCAGATCTTGGTCTCAATCTTCCCTGGTTTTCAAATCCTTCAGAGAAGTTTGATA  
TAAACACGGTGAAGTACACACCTTCTAGTTCTTCCAAGGCATCAGGTTCAACGCCTTTGCGGGTTGATCCTGAAGCTTTCAAGAGACAGCTTCAGG  
CTAAAGCTAAGAAAGTGAGTGCGACGTCTTCCCGTCCCGATGCGAGGGAGGTGTATCTGAAGGGTGTTGGTGAGTTCAAACCGGACAAGGTTT  
CTCACAGAAAAGCCCTTTCTGAACCTACTCCGTGCGAGGAAACCTTCCCTCTGAATGGATGTCTATCTCTCGAGCATCATCTGATTATCTGTTTCGATGAT  
GATCATGAAGACGCAAGAGATTTCGACCAAATCAGACGTTGAGACTAACCCTGGACCTTCGATCAGGCATTTCCGTTCCAAGTCGACTTCAGATTTG  
AGGGTGAAACACCGTCTCTAAATTTTACACCACCTACCCCTGGTGATGTCTTAACTGTGCACCATCCGACTCCACCTCGTTTGAGGGTTAATCACAG  
GATGAATAGACACACTGTGATTGTTCCCTTACCAGGGTGAAAACACGTGCAATTGGAATGTTGGTTACTCGTCATTTGCGTGGCCTCCTACAGAGGAG  
CATCTGGAACCTCGAGACTCCAGAACCGCGGATATAGAAGAAAATCCCGGGCCAAGTGAAACCCTTGACCCCACTTTGCCCCAGTTCCGGGGTTCGA  
AGTGGTTCACGGAGTTCAATCGCTGTTGCCACAACGGAGCGATCACCTCTAGAACGCGTAGGTTCTTTGGAAAGATCGGCATTCACGGCAAAAAGC  
GCGACGGAGGAAGTTAAGGACATTTTTGGATTCAAAGAACATGACGAGGTGTATCCTTACACTGGCAAGAACTCGTCGTTTCGTAGAGAAACATTAT  
GAATTCCACTATGTCCTTTCTCATCTACCTAAGGACAAGAAATGGCGGTCGTCAACTTTTCATTAGGTGGGTTGCCGCTGCTTCTCTGTCCGAGCTTCA  
AAAATCACTTGACTGTGTAGTAAAGGCTTCACATCCTTTCAACACCGCGCTTGTGAGTAAGCTGCGTGATGAGACGAACTCCTTCTTTCAGAAGATC  
TCCGATTCTGAGCCGATAGGTGGTACGACCGTATCTGCCTTAGCTCATACTGTTCAAGACTCTGTACGCCTGCCCTAACAATGGGTGCGGTTACGCACT  
AGAGATAAAAACCAGAAGATGGAATGGTACTATTTCACTTGACTGAGTCTCCAGACGAAACCGTTAAAAACAGGTTGTGGTGGGTTTTGAATGGGAA  
TGAGATTTTGCATGGAGGGGACAAAACCCCTGTTTCCCCAAGCACCGTCTCATTTCGTTGGCTAGCAAAGGAATATTTCGACACATGAGGTGATCATC  
GAGCCCAAACCGGACTCTATGCTATCACAAGAGAAACCAGGGCCGTTTGCAATGCCCTCGCTCTCTCAGTTTCAGAAATGTGTCGACAAGATTATCC  
CTTCTGGTAGTCATTTTTCTCGTTCTAAAGTCAGTGAACCTCAAAGATCACATCAACCAGTACCTGGAGTCTACAGATGTCAAGATAGTAGATCCGGTG  
CTGGTCGCGGCGATCGCAATGAGTTTAAAGTCGAAATTCAATTGTCCAAAAGAAACCAGCTCTTTCGCAATTGATTTTAGGCTCGACCGAGGAATGG  
TTGTTTTCTGTGCCACAGATTCCCCTGAAGATAAGAACAAGGGGAAACTTTACTGGTGCATCGGTGGTAGTGTTATCGTCCATGGCGGGTTGCTAGG  
TATTGAAGATGGGAAGTCTTGTTCCTTCATCATTAGATCACTATAGCAAGTTATGGACGATGCCACTTCCGAAATTAGGTTGGGTAGACAGATCTTTTG  
ACGCTGAATACTTCACGAAGATCTCAACCTGGCAAAAGGCCCTCGATCGGTGTGAACCGATCGTTGTATTCTCTGAACACACATTGCAACGTATACT  
CTACCAGTATTTTGATGGTGTGACAGACAAAGTTTTGTCCCCATCACATACTGCAATCGTTGCTTGTGTGGTGAAATCCTTGATGAAATGCCCGGAGA

ACGGGGTAGGGTATGCAGTACAGTTTGACAGTCATGGGGCTTCACTGTACGTGTGTCGGCAACCGAATTTTCGCGGAGGTGAACCGGTTGTGGTACT  
TTCATTGGGATTTCCCTTTTCGTGCACGGGGGAAGAAAATCTTATGCTCCAGAGCCCAGGCGGTTCTTTTATACTGAGCATCTCAACATAGATTATTCCA  
TACCCATGCATGAGGTTTTTGTGGAAAGGATCTACCTAAATCCAATTCTTCTCATTTGACTGTCAGGAGTCAACAAGAATTGTATTTTGGTTTTTCAGC  
AACAAATTGATATGTATGATGCGCCAACGCCAGCCTTCATGCATTCAAGAGCACATAGCACAGCCGAGCAAGCCATACGTGACACCGTGCCCAAGAT  
GAGAACTTCCCAGTTCAATTTTGAGCACATTGCTGCGATAGCCATGTGTTATAGATCCAGGATGCAATGTCCGTGTCCGGAGTCTGCTATGGCAATCG  
ATTTTGACTTCGCCAATGAACGCATTGTATTCTTTTCGAACCTAGGCAGTGGGTATTTCCGCTGTCGGGGCCAAATGTGGTGGTGTGTAAACGGAGTT  
GGTCTGATTCACTGGATCAGTGTTTCACACCTACCACAACCAATCAAACCAATCTCGACCTAGTCCCCGAGTGTGTAGGTACTGGGACGAGATTG  
TTTCTTTTCATTTGACCGAATTCTGCCAACCCACATTGGGTTATTGGACATCGGATTTTCACCTGCAACCTGACAAAGACGAACAGTTGCAAAGAGC  
TCAGATTGCACTGGATGCACATGATGACCCTGTTGAGCCCTTCAGCAGGGACATCGCAGTGTTTCATGCATTTGAGGCAATCAGACAAACGGCCCCAA  
ACGGTCGATATAACTGTCATGAAGATTGAACATCTGATCATCATGGCGTGCATATATCGTTCGAAAATGGCGTGCCCTACAGCAGGCACTTCAATGATT  
GTCCAGTTCGATTTGTCAAACCAAAGAGTGAGATTCGGCGTTGCAAGAGGAACCCATCCGGAGTTGGATGGCAGAATGTGGTGGTATCTGCACGAC  
GATTGCATGATCCACACTGGTAGGCCGGAAAGCCTCACTCCGGTGAGGTTGGAACCTCCGTTTCCTGTCAGCAGTCGGTTTTCTTTTCGTGCAACTC  
ATCGTCAGGCCAAGGTGATGGCTAACGATTTTGAAGAGAAGTGGAGAGAAGACTCTAAGTGTAGGGCACGGACATGGCACATTGAAGGTGATGATA  
CACCGAAGCAAAAGCTTGCTCGGTCCCATCACCTTTGTGGTGTCCGAATACGTTTCGACGAACGGTTCGACGAGATCTTCGTTGCCGCGTACATTTG  
GTTTTTCTTTCAACTCATTTGCACGTTCTACTTCTCGTTCTCTCGGCCTAATCTTCGGCGAAAACCTGACAAACACACGGAAGGAGGAGAGCATCCT  
CTTGAGATGAGGATTTTTCTGCATCATCCTCCTTACTCGTGTGTAAGTTAGGAACCAGAGGTGATCAAGTCCCTGTCGACTATTACGCGAACGTGGC  
GGCACACTATGGTGTCCGCACACATTCTCACGTATACAAAGATGTGACGACAGATGATCTTGAAAAGATGAAAAGTCGGAGACTTTTCATCTAGTTCC  
GCTGGTTATTTGAATCTCGCGTACGCTTCTCAACTTGTTTACAAGAGAGTTTTTACCCCCGCACGTGGAGGTGGAGAGATCTCAAGGTGTGAGTTACA  
CCTTGTCACCAAGTTCAAAGTGGGTAGAAGCAACGAGATTCATCGCTGATTGGTCGAGGGTTTCCTGGTCCAACCTTTCTCCCCGCGTGGATAGCCAC  
GAGGGTTACCGCTGTGTACGTACCAACTTTCAGAATTGGTGCGTTATCAGGAAGTGACATCCCGCGTTCTCATGACGGGTTGAACTTGCTGGAGAAA  
GTTAAGAACACAGCAAAGTTTCGATGAGGGTTGGACATCTGGCAGCTCATCAGTTTCAGTAATCCCTGACGAGATCAAGTTAAGATGCCCCGAAGTA  
CCATCGGGTAACCATCTTGAAATATTAAAGGATTACAAAACGGTGCACATTCATGGTGGAGCCGGTACTGTGCAAACCTGCCATTGCTTGCGGCGCAC  
GACCGGTCATCCACGACAAGACACTCGATAGAGTGTATCATAGGATGCCTGGGCCAGAGGATTTCAAACAACCTTCTATTGGGAAGTTCATGGGTTG  
GTTGGTATCTGCCGGTTTTAAAGTTAATGCACCAATAGAGGTAAGAGCGTGGTGGTTGTTACAATGGTATTGGTCGCAAAAGTGGAACCTATGCGTAC  
GACGCATTAGTTACACTTGCTAAAGCTTACACCATATCATCGTATGTGTACAATCATTGGGAACCTTTTCCTCATTCTTTTCTTACCAGTTCCGGCAGTG  
GTCTGGAGAATGTTGTTTTCTTCAAATCATTGTTCTCCATAGTCAAAATTTGTGCGCTTGGTTTTTGGCGCTACCCTGTGTTGTGCCTGTTAGATTCTG

AAAGTCACTTTCGTGGCAGGAATCTGGTCAATGCAAACTTGTGGATGGGCGCGGCGCAAGATTTGTCTGCACTCATGGAGACACGATCTTCACTG  
GTTTGGGAGCCAGTGCAAAAGACCGTAGGAACGAAGAAGTTGACGTTCCCTTTTCCCCTTGGGCATTGGAGCATGAAAGACAACCAAACCTGGTAA  
AATCTACGAAGGTAGATTTGTTCGGTCCCTCCGAAACTATCGGAGGGAACCTCCGCCTTGTAAGCACTACTCGTGAATACAAACGTGGATTCAAGTCT  
TTTCCTGCCCCCTTCAATGTTGGCCATGCAGAGTCTCTTGTGAAGGCTCAACACGTAGCACCATACTCGTCTTCACATAATTGTGTGACTATGATGGT  
GCAACTTTGTGCCAAGAGATCAACTGCATGGACAGCATGTATGGTGATGGTGGGTGCCTTAACGGGACTTGCCCTGGCGCCGCCAAAACCTGCTCAA  
GGACATTCTTTCTTTTCTTTTCCCTGGCAAGGATTTTGCCAGTACTCCTTTTTATCGATCGCTTGGCTTTGCCGCGTCGTTAGAAAACATCCCGTTTGA  
GATAGAAGGGATGGTTCGAAACGACAGAGCCAATGCCAGAGACAGCTACACCTGAACCAACAGATCTGGCGGATCCAGATTCTTTCAATATGTTGGT  
CGATGAAATAGCGTTCATCCAGGCATGCGTGGAACAACTCAAGATACCTACCTTGGACAAGGAGGCATTTGATGAGGTTTCACAGCGAACCCTAGA  
AAAGGAGTTGGACAAGGTCGAAATCCCTGAGGATTCGTTAATCAGGGTTTCCAACATACCACCAAGAGTGCACCATGAGTGGGCGCAACTGGTGG  
ATGGTCTACACCATGCTATTTCTTTTCGTTTCGCACAAATCGCGTCGCAGACGCGTTTGTGTTATACGTAAAGAATGCTGGTGAAAATATATGACTTTG  
TCCAGCCGATACTGGAAATCCTTTCTTCTTCTTGCACCTTGCAGCTGAGCACTCCAAGCATGCATTTCGATCGCTTGTTCAAATGGCTCTGCGATTTT  
CTGGACCATGTCTGGGGTCTAGAAGCGTCAAAGAGAGTCAAAACAGTGTGGGGCCTGACTGGCCTTCATCGAACGGGATTGCTTGGGGTAAAAGC  
CAAACCTTGACGCTAATGTTGCTTATTCTGATTTTCGTAGGTAGACAGGATTTTGAATCAGATTACAACAAGCTGGTGCAAGAAGGCAAGCACCTTGCT  
CAGGTGTATGGTGCCGTAAACGATCAAACCTTGGAGGGCCTCAGAGGAGGCCTATAGGTTATGGAAAACCTCTAATGTCGCAATCTGAAGCCAGTC  
TGCTCGGTTTTCGAGCCAGACGAATTTGTGACTGATCGTGAGTATGAGGATCGTGTGCAATCGTACCTTGAACAGGGTGTGTCACAAGGTGCTGACG  
GGGTGTTTTTGGCAGACAAGAGGCCGGAGCTGATTGCTAAATCACAGCACCGTTATGAACCAAAGTATCCCGCACTCACTTCAGAGGATCGTTCCAT  
GGCCAAGGAAATAGCCCAGGCCATGTTTGATCAATATCCGGAAGTCTTCGCTAATTGTGATATTTTGCCACCAAGGGCAGTCCACAATTATGTGAAGC  
AAAAATACTCTCCAGGAACCCCGTTCATCAAACCTGGGGGCTTCAAATCTCGTCAAGCGATGTTTCGACGCTGGTTATGACCGCGTCATGCAACGACG  
AGCAATGCATTACTTGAAAACCTGGTGAATATCCAGTGCAGTTCTATCACGCTTTTGTGAAATCACAAGTGGTAGATATCAAGAAATGCTTAAGCCCCG  
AGGAAGGTGGAAAAGGGAAAGATGTTTCGCACTGTAGTCAGCCAGGATCTGTTCTCCTATTACATTGACCAATGCCTCCAAATTGAGCGCAATAAAC  
GCATCAATTGGGATACGTATGGTGCAGGTATAGGTATGCCTCTTAATCAGTCGATGGAGGCGATATACAGTAGAATGGCAGCTGCACAGAAATCGAGA  
GGAGGCAGGTACATCATTGCTGATGCAACCGCCTTCGACTCATTTTGCAAACCTTTCTCTTTGAAGTAAATGCAAACCTTTGGGAACTCGGCTACA  
AAGATCATCCAAGCGGTAACGGCAAGAACCTCGCATCTGTTCTAAATGCGTCGTATCAAGCCAGACAAAATGCATGGATTATCGGAGTGACCGAGCC  
GGAATATGACTCGTTGACTGTTTGCGTCCAAGACAAAAACAGTCGCGAGCTCATACGGCAACGATCCCCGAAGACAGTAATCTGCTTGAAGATCT  
CATAGACTGGGACAAGTACAATAGATTGCCTGCTGAGCAACGTTTCAACTACGTTGCAAACTTCAACCAACCCGAAGGGAAGACGGTGGTAACCTG  
GGATCCTTCTCTCCGCCCCGTCCAGGTCAAACCTGGATGGGTAAATATGAATATGGTGTCTTATCTGATGTTGACAAGAAGTTCTTTGAACATCAGACTT

TCACATACGATCCTTCAAATTTTGAAGACATGTATCAAGACATATTATCAGTTTCACGATCAAATTACAAACTGATGTCAAACGTACATGCGAAGAATC  
GTGGTGGGAGCACTGGAGGGTCAGATACATCAAACGTTAACACACACGCTTCAAGGCAGGTGTGATTTACGCTTGGTGTCAAACAACCGGCAGG  
GCCCCAAAGGAGTTCTTCCAGTACAATGACCTTGCCAATACATCAGATGACACCATTTGGCAATCGGGTGGCAAACATGGCCTAAACACTGTTGAAG  
ATGTCGAAGTGTTTCGACATCATTGTCAGTCAGTGGGAATTCATCTGGAGATAGAAACGACGAAGAACATATCACAAGTAGAATACTTGTCAAAATT  
CGTTCGTGTTCCCACTGCAGAGGACTCAGAAGCATTGAAAGTCTGGAGATCCCAGAAAATCAAGGCTGCTTCAAATGCCACAAACAACACTAGGCCT  
AACTGTTCCCTACTTCATGGGAGCAGTTCAACAACCCGCAATTCGTTCGTGCTTCAAACCCCTTCTGCGATCTTGCTCCGAAGATCTGCGTTTAGATATT  
ATCAATCTAATGCAAACCATTTGGAAGTATGTTTCAGTAGAAAGAGGTGCCGGTCATGCTCAAAGCACCGCCTTTTCTACCTGAATTATATGGCAAGTTC  
GCACAAGAGTGGTGGCAGCAGATCAATGATCTTCTGGTACAACAGAAGATCCATAGGAAGTTCAAGGTCACGAACGGCCAATTTGGACTACAGTGT  
GTCGAACAGGTGGATCCGAGAGCGTCGCAACAACAGCTCTCACCACGTCAAGTCGCTTTCCCTCTCATGGCTAAGGGGAAATATGTTCCCTAGTTACT  
ACAGGGTACTTGACATCCACATGAACGTCGCAAAAGTAGATCCAGAACGACACGCCAAGTTCCTTCGTAAACTTGAGAAAGGTTGGCGAGGTTGG  
GAAGAACTGTTACGTGAAGGAGTGGATAATCTCTACGCCTTAACTGATTCCATCCCAGATGAAATCAGCAAAAAGTTCCAACCCGGCCTCGACATGC  
TCTATGCAGAGCAACCATTTCTACACGAAGAACAAGGTCGTTGAAAAGTTTGTTTACTTGAAACTTCTGGAAGAAAGCCCAGAGACAGAGGTCACAT  
TTTCAGATTTCTCTGCTCGAATTCAAGAATCACCGTATGCTTCGGTGTGCGACCCCTATCACTTCTGGGAGAAGTTAGGGGAGCCTGAATTCAAGGA  
GCAGCTAATGGCTGAAGATCCTCTGAAGATACAAGGTCTCGTCTTGCTTATAAGTACTATGTACCTATTGACAAACACAGCTGAGTCAGTAGTATTGG  
CCATTCCTTTTGTGTCCTGTTCTACAACTCTTCCTGTGGTCCTTCATCGGACTCAACAAGGTATATGGACTGTTGAACACTATGTATTGGCATTCCG  
AGGGCAAGTCGTCGAGAGAAATATCTCGAATCATGCCCCGGGACCCATACATGGTAACAAAACAGTTTGCTGCTTTTTGCATCGACTTTGCACCATC  
ACAGCTGGGTACTTGGCCCTTATCCCCTGCACATATTGTCCTTACTTCCAGTGTGTTTTCGAAGCACTTGGAAGCATGGTATGTGGCAGGGGAG  
GTCAAGAATGTGATGGAACCTCCTGGCAGCACCGTAAACAAGTGGGATCAATACGCAGATGAGTACATACAAGCTCTGCGTTCATCTCCACAAAC  
AGAAAATACGTTGCTGCCAAGACTTCAACTGGCAAATCGACCTGGTTTATAGCTGCCCTGTGGAAAGCTAGACACCGCCAGAAGGTCAGGAAATTT  
TGGCTCGTCGAGCCTCGACTGGTATTACGAGACAACACGCATATACCATTCGACGCACCCTATCAAGTGCTCAAGGACAACATCCAAGTTTCAAATA  
CCCACGATATCCACATCTTGACGTATGGACATTTACAGTCAAGATTGTTGGATATAGATAACGAACGTGATATCGTCATTTTTGACGAGTTTTCACGAAC  
AACAAAGGTGAAATGATTCTTGGAATTGACAAGTGCAAGGCGCCAATCTTTCTTCTCTCGGCCACGCCAGCCGAAATACCATCTCTGCACGGTTCCGG  
AACTCTAGTTCCAAACATTGACAGACGGCATCCAATCCAGATCCACCAAGTGGATGATGGAATGGGTGTTGTGCGACATGTTTATGGAAGCCAGAAAC  
CGTTACCCTGATTTATGCAAGAGAGCGATGATCATTGTGCCAACTCACAAGGAGGTTGCAAAGGTTATCGCTTCCCTTGATTATCTCAAGGTAGGTAA  
GGTGTCCCCTCTGTCAGCACGCGACCGCGTGGTACAAGAAGAGGGAATATTGGTGTGCACCCCTTATGTCCAAACGGGTCTAGACATAAAACCACC  
ACCAGATCTTTTGATCGATTGTGGCAAAGACTTCGTTTTGGATAAAGGGCGTCCAGTATTTCCACTCCCATGGACAGATAAGGACATAAACCAGCAG

AGGATTGGTCGTGTTGGAAGGTTAAGACCCGGATAATTCCTAATAAATACAATTCAGC

> Cb\_clean\_k141\_17023

GCCACGATCACGAAAAGACCTTTCGGTCATACCTTTTCAGGTATGGTACTACGGCCGCTGTCCCCACTCCGTTGGATGGGACCGCGACGGCAACCA  
GCGCGCTTAGAGCTGCGCGCAAAGAGTTGAAAACCTCTCTGTGGTTTACTTGGGGAATCCTTTGGATTCTCCCTCGTTGTTCCACAGTTTTCTTCCCTA  
AAAGCTCTCAAGGGTTCTTTGTCTGGGGCCCTTGACCCCTCTAGCGACCGCTCTTGGTTGCGGCCGGTTCTGAAGTTACCTCTTCGGGATCGGTTGT  
CCGTCCTCGGGTCGATCTTCCTCTTTAGGAAGGTCCTTCCTGCCAGTACACCTGATCTTTCAGCCTACGCTGATAAGATGCAGGTTCCGG

> Cb\_clean\_k141\_7251

TAGACAGTCCTTTTTGGGCTTCCAGTCAGTAGTTCAGTCGGGTGGTCCCCTTCCCAAGGGGGTGGGCGGTTGGCGCCTCCGTTATAAGGAGGTTCCCT  
TCCGCAGGGAAGTTGAGGGCTATGGGTATTCCAACCTTACCGTTGGGATACCCTTGGGCCTTTGCACGAATGCCTCTATTTCGTACCTTGGTGGTAAGGA  
TTGGCTGCTTGTGGTTCCTCCAACAGCAGACAGGATCAGCTCGGTCTGTCAGTTTGACTGGCAGACTTCTGTTGATCTGGTAGGGGCGACTGACAA  
CCTTCTGTTGGACGTCGCCGATACCATCCTTTGCGCTGCCCTCGCGCAGTGTGAGTTGGTTCCTGGTCGTGTGCGCCAGGACGCTGTGGATTCCCTT  
CGTCCGACCGTTGGTGACTCTTCTGTCACTCGCGGCCAGATGATGGGCACTTACCTCTCTTTCCCCTTACTCTGCCTTCAGTCCTACGTCGCCGCCCG  
CTGGGCCGTACGCGGGCGCGATGCCAGAGTGTTAATCAACGGTGACGACTGCCTCATAAGCTGTCGTA CTCCCGTTCTCAATAGTGACTACCCCTCT  
TGGGCAGTCATTAACGAGTCCAAAACCGGCCGTTTTTCAGTCGGTAGCTGAGATTA ACTCCACGTGTTTCCTTAGGGACTCACGTGGAAAGTGGAAG  
GAGGTGAAGCACCTCAGGAGGGGTGGTGGTTCCCGTGACCTCCAGGGTCACATCCACCAGGCAGCTGTTTGTCTGCTGCTGCCGGTCCGTTGTGGGA  
GCGTGCTTTCGTCCTTTTCGAACTTCGCTCGAGGTGGGTCTACGTCCGAGTGACCTCGGCTTCGATCTCGGCGTACTTGAGACTTTCAAGTACGAG  
CGGCGGCTTCACCGCCTCGGCTATGCGGTCTTGCCGCGCGCCACCGGTCTCGATGACAGTCGTTACAGGCTCAGCCTGTCCTCGACCAGCGTAGAA  
AGGTTGGAGGTCTCTTTGGACCTTTGGGTGGGCGGTCGGTCTTTTCAGACCGCCAGGGATCCGCTTTCCTACAACGCTTTCAAGCGTTTGATAGTTA  
AGCCTTCTAGAGCGTACCTTCGGGCTCGCTCTTTAGGTTGGCGTGCGCCGA ACTTACGTTTCGGCGTTAGGTCACCGGTTCCCTGTCCTCGTCCGCG  
TGGCGAGGTCGTCCTAGCGGAGTCTCGGCTGCCCTGCAGCCCTGGTCCCGTTTGTGGTGGAAGACGGGGTTCTTCTCGTCTGCGAACCTCCTACT  
TCAGCTTACTGAGTAGGTTTCGCGCGGTGTGTCGTGCGCCGGCTGGCGCCCCCTACGGACTCTCTCCCCATACGGGCGTCCATAGTTGATCTCTCCTC  
CGCAAGTGCGCGTGCTTGTCCCCTCGGGGTACCTGTTTAAGACGGGTAAAGCACGGCCGCCTTTGACAAGGCAGGGGGACCTCA

> Cb\_clean\_k141\_17237



AGGAAGTTTCGCACGGACAGATGATGGGGAGCTACCTCTCCTTTCCCTTATTGTGCATTCACTCGTACCTCGCCGCGCTTTGGGCGCTCGGTGAGAG  
AGAAGGCACAATCCTCGTTAACGGTGACGATACTCTTATTTTCGTCGTCGTCTTACGTCGAAGCTTCGCATTACCCGTCGGGGTACCTTTTAAATGATG  
CGAAGACTATTCGATCAAGAACGTGTGCAGAGATCAACTCGACAGCGTTCTTGAAGGACGGTAAGGGTAAGTGGCGTGAAATTCGCTCACTTAGGA  
GAGGTAGTTTTCTTACCGATTATCGCGGGATGCTGCACGCTGCATCTGCTTGTGCGCCGCGATGTCGCTTGGACCGATGCCTTCGTTCCGGTCCCGGATC  
GGTAAGAAGTGGGGGTTCCCTCCCTTCCCAGTTGGGGTTACACCCCAGGTCCTACCCTGCTTTTTTGCAGGGAACGATCAATGGAGAACAGGTACTTC  
ACCTGTCTGCCGGAGGCTCCCAAAGAGCCTTCTCCATTACTTCGCGGGCTCCGCAGAGCCCTAGATCCTGACGAAAACCTTGCCACTGTTTTGCACC  
AGTGGTCCTACGGTCGGGAGGGAGGGAGGAAGAGAGACGAATTTAACCCGTCGTGTGGGTTTTGTTCGTCGGAGTTACGGGTACCGCAGCGTCAAG  
CTGTGGTCCAAGCTTACTTTCTTGGGTAAGTTAGCCGGTTTGAAGTACCGGACCCGTGAAGAGAATAAGATGTGTTTTCTGCCTGCAGATTACACAT  
CGATGCGAGAGGACGAAGTTCTCAGAGATCACCGCCGATTGACGTGTCTCGTTGAGGATGAGAACTTCAAGTAGAAAGGCCTCTTGGCCTAGGGCG  
GCACCAGTGCCGTTGCGGGGGACATAGGAGAAGACATGCTGTAGTGGCCAGCAGAGCCGTGACTGAACCCGTCCGGATAACCGGATTATTCCACG  
CCTACGTTTTTTCAGTCAAGATTGCTCTTGGACTCGATAGGTACCTCCTCAGTAATGAATGGTTTTAAAGGGAAGTAAGGTAGGACCTTGAGTGCCTCCT  
AATCCGGGGAAGGAAGTCGGCCGATGGCCCTTCGGGGTTGGGAGCTTAGAGACTATGTCTCGTAAGCCAGTTGAGGAATGCGCTCCGGCGCTACCG  
GATACCCACACTAGCAGTAGAGTCCCTATGTTTCAGGGCC

> Cb\_clean\_k141\_36573

ACGCCACAGACAACCTGTCCCTTGTTGTGACAGAGGCGATACTGGGGACTTTACTCAGAAAGTCCACTCGTATCCCTGGCTCTGTTAAGCTTGTAGC  
TTTCGAGTCACTTCGGCCTTTTGTGATGGGCCGAATGGGATGCAGGAAGTTTCGCACGGGCAGATGATGGGGAGCTACCTCTCTTTTCCCTTATTGT  
GCATTCACTCGTATCTCGCCGCGCTTTGGGCGCTCGGTGAGAGAGAAGGCACAATCCTCGTTAACGGTGACGATACTCTCATTTTCGTCGTCGTCTTAC  
GTCGAAGCTTCGCATTACCCGTCGGGGTACCTTTTAAATGATGCGAAGACTATTCGATCAAGAACGTGTGCAGAGATCAACTCGACAGCGTTCTTGA  
AGGACGGTAAGGGTAAGTGGCGTGAGATTGCTCACTTAGGAGAGGTAGTTTTCTTACCGATTATCGCGGGATGCTGCACGCTGCATCTGCTTGTG  
CCGCGATGTCGCTTGGACCGATGCCTTCATTCCGTCCCGGATCGGTAAGAAGTGGGGGTTCCCTCCCTTCCCAGTTGGGGTTACACCCCAGGTCCTAC  
CCTGCTTTTTTGCAGGGAACGATCAATGGAGAACAGGTACTTCACCTGTCTGCCGGAGGCTCCCAAAGAGCCTTCTCCATTACTTCGCGGGCTCCGCA  
GAGCCCTAGATCCTGACGAAAACCTTGCCACTGTTTTGCACCAGTGGTCCTACGGTCGGGAGGGAGGGAGGAAGAGAGACGAATTTAACCCGTCC  
GTGGGTTTTTGTTCGTCGGAGTTACGGGTACCGCAGCATCAAACGTGTGGTCCAAGCTTACTTTCTTGGGTAAGTTAGCCGGTTTGAAGTACCGGACCC  
GTGAAGAGAATAAGATGTGTTTTCTGCCTGCAGATTACACATCGATGCGAGAGGACGAAGTTCTCAGAGATCACCGCCGTTGGACGTGTCTCGTTG  
AGGATGAGAACTTCAAGTAGAAAGGCCTCTTGGCCTAGGGCGGCACCAAGTGCCGTTGCGGGGGACATAGGAGAAGACATGCTGTAGTGGCCAGC

AGAGCCGTGACTGAACCCGTCCGGATCACCGGATTATTCCACGCCTACGTTTTTAGTCAAGATTCGCTCTTGGACTCGATAGGTACCTCCTCAGTAAT  
GAATGGTTTTAAAGGGAAGTAAGGTAGGACCTTGAGTGCGTCCTAATCCGGGGAAGGAAGTCGGCCGATGGCCCTTCGGGGTTGGGAGCTTAGAGA  
CTATGTCTCGTAAGCCAGTTGAGGAATGCGCTCCGGCGCTACCGGATACCCACTCTAGCAGTAGAGTCCCTATGTTTAGGGCCCTAGGTTGCAGTGC  
GCGTC

> Cb\_clean\_k141\_50990

CTACGGAGGAGAAGATATCATCTGCCTGTGTTGGAAGTCACCAGACCTCAGTTGATCTGGTGAACGCCACAGACAACCTGTCCCTTGTCGTGACAG  
AGGCGATACTGGGGACTTTACTCAGAAAGTCCACTCGTATCCCTGGCTCTGTAAAGCTTGTAAGCTTACGAGTCACTTCGGCCCTTTGTTGATGGGCCG  
AATGGGATGCAGGAAGTTTCGCACGGGCAGATGATGGGGAGCTACCTCTCCTTTCCCTTATTGTGCATTCACTCGTACCTCGCCGCGCTTTGGGCGCT  
CGGTGAGAGAGAAGGCACAATCCTCGTTAACGGTGACGATACTCTCATTTTCGTGTCGTCTTACGTGCGAAGCTTCGCATTACCCGTCGGGGTACCTT  
TTAAATGATGCGAAGACTATTTCGATCAAGAACGTGTGCAGAGATCAACTCGACAGCGTTCTTGAAGGACGGTAAGGGTAAGTGGCGTGAAATTTCG  
TCACTTAGGAGAGGTAGTTTTCTTACCGATTATCGCGGGATGCTGCACGCTGCATCTGCTTGTCGCCGCGATGTCGCTTGGACCGATGCCTTCGTTCC  
GTCCCGGATCGGTAAGAAGTGGGGGTTCTCCCTTCCCAGTTGGGGTTACACCCAGGTCCTACCCTGCTTTTTGCAGGGAACGATCAATGGAGAA  
CAGGTACTTCACCTGTCTGCCGGAGGCTCCCAAAGAGCCTTCTCCATTACTTCGCGGGCTCCGCAGAGCCCTAGATCCTGACGAAAACCTTGCCACT  
GTTTTGCACCAGTGGTCCTACGGTCGGGAGGGAGGGAGGAAGAGAGACGAATTTAACCCGTCCGTGGGTTTTGTTTCGTCGGAGTTACGGGTACCGC  
AGCGTCAAGCTGTGGTCCAAGCTTACTTTCTTGGGTAAGTTAGCCGGTTTGAAGTACCGGACCCGTGAAGAGAATAAGATGTGTTTTCTGCCTGCAG  
ATTACACATCGATGCGAGAGGACGAAGTTCTCAGAGATCACCGCCGTTGGACGTGTCTCGTTGAGGATGAGAACTTCAAGTAGAAAGGCCTCTTGG  
CCTAGGGCGGCACCAGTGCCGTTGCGGGGGACATAGGAGAAGACATGCTGTTAGTGGCCAGCAGAGCCGTGACTGAACCCGTCCGGATAACCGGA  
TTATTCCACGCCTACGTTTCTAGTCAAGATTCGCTCTTGGACTCGATAGGTACCTCCTCAGTAATGAATGGTTTAAAGGGAAGTAAGGTAGGACCTTG  
AGTGCGTCCTAATCCGGGGAAGGAAGTCGGCCGATGGCCCTTCGGGGTTGGGAGCTTAGAGACTATGTCTCGTAAGCCAGTTGAGGAATGCGCTCC  
GGTGCTACCGGATACCCACACTAGCAGTAGAGTCCCTATGTTTCAGGGCCCTAGGTTGCAGTGCGCGTCTA

> Cb\_clean\_contig\_965

GCGGTAGACACGCACTGCAACCTAGAGCCCTGAACATAGGGACTCTACTGCTAGTGTGGGTATCCGGTAGCGCCGGAGCGCATTCTCAACTGACTT  
ATGGGACGTAGTCCCTAAGTTCCCAACCCCGAAGGGCCATCGGCCGACTTCCTTCCCCGGATCAGGACGCACTCAAGGTCTGCCTTACTTCCCTTT  
AAACCATTCACTACTGAGGAGGTACCTATCGAGTCCAAGAGCGAATCTTGACTAAAAACGTAGGCGTGGAATAATCCGGTGATCCGGACGGGTTTCAG

TCACGGCTCTGCTGGCCACTAACAGCATGTCTTCTCCTATGTCCCCCGCGACGGCACTGGTGCCGCTCTAGGCCAAGAGGCCTTTCTACTTGAAGTT  
CTCATCCTCAACGAGACACGTCCAACGGCGGTGATCTCTGAGAACTTTGTCTTCTCGCATCGATGTGTAATCTGCTGGCAGAAAAACACATCTTATTCT  
CTTCACGGGTCCGGTACTTCAAACCGGCTAACTTACCCAAGAAAGTAAGCTTGGACCACAGTTTGATGCTGCGGTACCCGTAACCTCCGACGAACAA  
AACCCACAGAAGGGTTAAACTCGTCTCTCTTTCTCCCTCCCTCCCGACCGTAGGACCACTGGTGCAAAACAGTGGCAAGGTTTTCTGTCGGGATCTA  
GGGCTCTGCGGAGCCCCGCGAAGTAATGGAGAAGGCTCTTTGGGAGCCTCCGGCAGACAGGTGAAGTACCTGTTCTCCATTGATCGTTCCCTGCAGA  
AGGCAGGGTAGGATCTGGGGTGTAACCCCAACTGGGAAGGGAGGAATCCCCATTTCTTTCCGATCCGGGACCGAACGAAGGCGTCGGTCCAAGCG  
ACATCGCGGCGACAAGCCGATGCTGCGTGCAGCATCCCGCGATAATCGGTAAGAAAACTACCTCTCCTAAGTGAGCGAATTTACGCCACTTACCTT  
TACCGTCCTTCAAGAACGCTGTGCGAGTTGATCTCTGCACACGTTCTTGATCGAATAGTCTTCGCGTCATTTAAAAGGTACCCCGACGGGTAATGCGA  
AGCTTCGATGTATGATGATGACGAAATGAGAGTATCGTCACCGTTAACGAGGATTGTGCCTTCTCTCTCGCGGAGCGCCCAAAGCGCGGCGAGGTAC  
GAGTGAATGCACAATAGGGGGAAGGAGAGGTAGCTCCCCATCATCTGCCCGTGCGAAACTTCCTGCATCCCATTTCGGCCCATCAACAAAAGGCCGA  
AGTGAATCGTAGGCTACAAGCTTAACAGAGCCGGGGATACGAGTGGACTTTCTGAGTAAAGTCCCCAGTATCGCCTCTGTACGACAAGGGACAGG  
TTGTCTGTGGCGTTTACCAGATCAACTGAGGTTTGGTGACTTCCAGCACAGGCAGATGATATCTTCTCCTCCGTAGGTGGTCCGACAAGGAGCCAGT  
CAGTCTTCATTAAGTGACCATAAATGGTTTTATGAAGAGGCGCTAGCACTTCGGACCGCTCCTCATAAATGAGTAGCGGTCTTAACTTGCCGGCCGAC  
AGGACCTCCTTATACCGGGCTAACATGGGTCTCGGAAGACCACGGGACCCATGTAAGCACTGCCTACGGAATTCTTTTCCTTTACCTTCCAGTACTC  
GTCGGCTCTTCGAGCCGTCTTCCCTGGCAGTAGGGTTGGGGACATGACGCCAGACAAAATCGTCATACCGGTCATCCCAACCATATCGGAAAAGTTTA  
GAGACTTCCTTGCGTACGAAGCGAAGGTAGTCTGGAGAAGGGGGAGGGGGGTTAGAGAATGCGTTTCGCTTCCCAAGCGGAACGCACGGAGCTACT  
GTGAAGGCGACAACCCGACGGCAGGTTTCGCTTAAGAGATGAGACGGAATGAGCAAATTTCCCATCTCTCTCGCCTCCACAGTCTTTCAAGTCGACA  
AAGACCGTCGACTCCCTGACGTTGCCGTCGAGGGAACCTAACAGATGCTCTCTCCTTGCCGCTTAAAAGGAGATACGAGAGGAACATTCCAAGTCT  
TGATGGTTCAAGATCCGGTAACTCCGAGTTTGGCAAGCCAAACCGGATCCGAATAAGTCTTAAACCATTAGAAATGGCCTCTCTTGTGTCGCGCTCT  
GTGCGTAGGCACAGACGACACGTTTGAGCACGGGAACCTGAGGAGGAGTTACCCCGTGCAGCGGTGGCAGTCGACGCTTGAAAGCTGCTACCTGA  
ACTCGACATCGTAAGCCGGAAGGCGCGAGGGGTCGAGTGGAGTCCTATAACG

> Cb\_clean\_k141\_30077

GTCCGTTATAGGACTCCACTCGACCCCTCGCGCCTTCCGGCTTACGATGTCGAGTTCAGGTAGCAGCTTTCAAGCGTCGACTGCCACCGCTGCACGG  
GGTAACTCCTCCTCAGGTTCCCGTGCTCAAACGTGTCGTCTGTGCCTACGCACAGAGCGCGACACAAGAGAGGCCATTTCTAATGGTTTAAAGACTTA  
TTCGGATCCGGTTTGGCTTGCCAAACTCGGAGTTACCGGATCTTGAACCATCAAGACTTGGAATGTTTCTCTCGTATCTCCTTTTAAAGCGGCAAGGA

GAGAGCATCTGTAAGATTCCCTCGACGGCAACGTCAGGGAGTTCGACGGTCTTTGTCTGACTTGAAAGACTGTGGAGGCGAGAGAGATGGGAATTTG  
CTCATTCCGTCTCATCTCTTAAACGTAACCTGCCGTGGGTTGCCGCCTTCACAGTGTCTCCGTGCGTTCCGCTTGGGAAGCGAACGCATTCTCTAAC  
CCCCCTCCCCCTTCTCCAGACTACCTTCGTTTCGTACGTAAGGAAGTCTCTAACTTTTCCGATATGGTTGGGATGACCGGTATGACGATTTTGTCTGG  
CGTCATGTCCCAACCCCTACTGCCAGGAAGACGGCTCGCAGAGCCGACGAGTACTGGAAGGGTAAAGGAAAAGAATTCCGTAGGCAGTGCTTACA  
TGGCTCTCGTGGTCTTCCGAGACCCATGTTAGCCCGGTATAAGGAGGTCCTGTCTGGCCGGCAAGTTAAGACCGCTACTCATTTATGAGGAGCGGTCC  
GAAGTGCTAGCGCCTCTTCATAAAACCATTATGGTCACTTAATGAAGACTGACTGGCTCCTTGTCTGGACCACCTACGGAGGAGAAGATATCATCTG  
CCTGTGTTGGAAGTCACCAGACCTCAGTTGATCTGGTGAACGCCACAGACAACCTGTCCCTTGTGTGACAGAGGCGATACTGGGGACTTTACTCA  
GAAAGTCCACTCGTATCCCTGGCTCTGTTAAGCTTGTAGCTTTCGAGTCACTTCGGCCTTTTGTGTGATGGGCCGAATGGGATGCAGGAAGTTTCGCA  
CGGGCAGATGATGGGGAGCTACCTCTCCTTTCCCTTATTGTGCATTCACTCGTACCTCGCCGCGCTTTGGGCGCTCGGTGAGAGAGAAGGCACAATC  
CTCGTTAACGGTGACGATACTCTCATTTTCGTCGTCGTCCTTACGTCGAAGCTTCGCATTACCCGTCGGGGTACCTTTTAAATGATGCGAAGACTATTTCG  
ATCAAGAACGTGTGCAGAGATCAACTCGACAGCGTTCCTTGAAGGACGGTAAGGGTAAGTGCGTGAAATTCGCTCACTTAGGAGAGGTAGTTTTCT  
TACCGATTATCGCGGGATGCTGCACGCTGCATCTGCTTGTCTGCCGCGATGTCGCTTGGACCGATGCCCTTCATTTCGGTCCCGGATCGGTAAGAAGTGGG  
GGTTCCTCCCTTCCCAGTTGGGGTTACACCCCAGGTCCTACCCTGCTTTTTTGCAGGGAACGATCAATGGAGAACAGGTACTTCACCTGTCTGCCGGA  
GGCTCCCAAAGAGCCTTCTCCATTACTTCGCGGGCTCCGCAGAGCCCTAGATCCTGACGAAAACCTTGCCACTGTTTTGCACCAGTGGTCCTACGGT  
CGGGAGGGAGGGAGGAAGAGAGACGAATTTAACCCGTCCGTGGGTTTTGTTTCGTCGGAGTTACGGGTACCGCAGCGTCAAGCTGTGGTCCAAGCT  
TACTTTCTTGGGTAAGTTAGCCGGTTTGAAGTACCGGACCCGTGAAGAGAATAAGATGTGTTTTCTGCCTGCAGATTACACATCGATGCGAGAGGAT  
GAAGTTCTCAGAGATCACCGCCGTTGGACGTGTCTCGTTGAGGATGAGAACTTCAAGTAGAAAGGCCCTCTTGGCCTAGGGCGGCACCAGTGCCGTT  
GCGGGGGACATAGGAGAAGACATGCTGTAGTGGCCAGCAGAGCCGTGACTGAACCCGTCCGGATAACCGGATTATTCCACGCCTACGTTTTTAGTC  
AAGATTCGCTCTTGGACTCGATAGGTACCTCCTCAGTAATGAATGGTTTAAAGGGAAGTAAGGTAGGACCTTGAGTGCGTCCTAATCCGGGGAAGGA  
AGTCGGCCGATGGCCCTTCGGGGTTGGGAGCTTAGAGACTATGTCTCGTAAGCCAGTTGAGGAATGCGCTCCGGCGCTACCGGATACCCACACTAG  
CAGTAGAGTCCCTATGTTTAGGGCCCTAGGTTGCAGTGCGCGTCTACCGC

> Cb\_clean\_k141\_57947

GTCCGTTATAGGACTCCACTCGACCCCTCGCGCCTTCCGGCTTACGATGTCGAGTTCAGGTAGCAGCTTTCAAGCGTCGACTGCCACCGCTGCACGG  
GGTAACTCCTCCTCAGGTTCCCGTGCTCAAACGTGTCTGTGCCCTACGCACAGAGCGCGACACAAGAGAGGCCATTTCTAATGGTTTAAAGACTTA  
TTCGGATCCGGTTTGGCTTGCCAAACTCGGAGTTACCGGATCTTGAACCATCAAGACTTGGAATGTTCTCTCGTATCTCCTTTTAAAGCGGCAAGGA

GAGAGCATCTGTAAGATTCCCTCGACGGCAACGTCAGGGAGTCGACGGTCTTTGTGCGACTTGAAAGACTGTGGAGGCGAGAGAGATGGGAATTTG  
CTCATTCCGTCTCATCTCTTAAACGTAACCTGCCGTCGGGTTGCCGCCTTCACAGTGTCTCCGTGCGTTCCGCTTGGGAAGCGAACGCATTCTCTAAC  
CCCCCTCCCCCTTCTCCAGACTACCTTCGTTTCGTACGTAAGGAAGTCTCTAAACTTTTCCGATATGGTTGGGATGACCGGTATGACGATTTTGTCTGG  
CGTCATGTCCCAACCCCTACTGCCAGGAAGACGGCTCGCAGAGCCGACGAGTACTGGAAGGGTAAAGGAAAAGAATTCCGTAGGCAGTGCTTACA  
TGGCTCTCGTGGTCTTCCGAGACCCATGTTAGCCCGGTATAAGGAGGTCCTGTGCGGCCGGCAAGTTAAGACCGCTACTCATTTATGAGGAGCGGTCC  
GAAGTGCTAGCGCCTCTTCATAAAACCATTATGGTCACTTAATGAAGACTGACTGGCTCCTTGTGCGGACCACCTACGGAGGAGAAGATATCATCTG  
CCTGTGTTGGAAGTCACCAGACCTCAGTTGATCTGGTGAACGCCACAGACAACCTGTCCCTTGTTGTGACAGAGGCGATACTGGGGACTTTACTCA  
GAAAGTCCACTCGTATCCCTGGCTCTGTAAAGCTTGTAAGCTTTTCGAGTCACTTCGGCCCTTTTGTGTTGATGGGCCGAATGGGATGCAGGAAGTTTCGCA  
CGGGCAGATGATGGGGAGCTACCTCTCCTTTCCCTTATTGTGCATTCACTCGTACCTCGCCGCGCTTTGGGCGCTCGGTGAGAGAGAAGGCACAATC  
CTCGTTAACGGTGACGATACTCTCATTTTCGTCGTCGTCCTTACGTCGAAGCTTCGCATTACCCGTCGGGGTACCTTTTAAATGATGCGAAGACTATTTCG  
ATCAAGAACGTGTGCAGAGATCAACTCGACAGCGTTCTTGAAGGACGGTAAGGGTAAGTGCGTGAAATTCGCTCACTTAGGAGAGGTAGTTTTCT  
TACCGATTATCGCGGGATGCTGCACGCTGCATCTGCTTGTGCGCCGCGATGTCGCTTGGACCGATGCCCTTCATTTCGGTCCCGGATCGGTAAGAAGTGGG  
GGTTCCTCCCTTCCCAGTTGGGGTTACACCCCAGGTCCTACCCTGCTTTTTTGCAGGGAACGATCAATGGAGAACAGGTACTTCACCTGTCTGCCGGA  
GGCTCCCAAAGAGCCTTCTCCATTACTTCGCGGGCTCCGCAGAGCCCTAGATCCTGACGAAAACCTTGCCACTGTTTTGCACCAGTGGTCCTACGGT  
CGGGAGGGAGGGAGGAAGAGAGACGAATTTAACCCGTCCGTGGGTTTTGTTTCGTCGGAGTTACGGGTACCGCAGCGTCAAGCTGTGGTCCAAGCT  
TACTTTCTTGGGTAAGTTAGCCGGTTTGAAGTACCGGACCCGTGAAGAGAATAAGATGTGTTTTCTGCCTGCAGATTACACATCGATGCGAGAGGAT  
GAAGTTCTCAGAGATCACCGCCGTTGGACGTGTCTCGTTGAGGATGAGAACTTCAAGTAGAAAGGCCCTCTTGGCCTAGGGCGGCACCAGTGCCGTT  
GCGGGGGACATAGGAGAAGACATGCTGTTAGTGCCAGCAGAGCCGTGACTGAACCCGTCCGGATAACCGGATTATTCCACGCCTACGTTTTTAGTC  
AAGATTCGCTCTTGGACTCGATAGGTACCTCCTCAGTAATGAATGGTTTAAAGGGAAGTAAGGTAGGACCTTGAGTGCGTCCTAATCCGGGGAAGGA  
AGTCGGCCGATGGCCCTTCGGGGTTGGGAGCTTAGAGACTATGTCTCGTAAGCCAGTTGAGGAATGCGCTCCGGCGCTACCGGATACCCACACTAG  
CAGTAGAGTCC

> Cb\_clean\_k141\_51878

GGTCCTGTGCGGCCGGCAAGTTAAGACCGCTACTCATTTATGAGGAGCGGTCCGAAGTGCTAGCGCCTCTTCATAAAACCATTATGGTCACTTAATGA  
AGACTGACTGGCTCCTTGTGCGGACCACCTACGGAGGAGAAGATATCATCCGCCTGTGTTGGAAGTCACCAGACCTCAGTTGATCTGGTGAACGCCA  
CAGACAACCTGTCCCTTGTTGTGACAGAGGCGATACTGGGGACTTTACTCAGAAAGTCCACTCGTATCCCTGGCTCTGTAAAGCTTGTAAGCTTACGA

GTCACTTCGGCCTTTTGTGATGGGCCGAATGGGATGCAGGAAGTTTCGCACGGGCAGATGATGGGGAAGC

> Cb\_clean\_k141\_18635

CTTCTCCTCCGTAGGTGGTCCGACAAGGAGCCAGTCAGTCTTCATTAAGTGACCATAAATGGTTTTATGAAGAGGCGCTAGCACTTCGGACCGCTCC  
TCATAAATGAGTAGCGGTCTTAACCTGCCGGCCGACAGGACCTCCTTATACCGGGCTAACATGGGTCTCGGAAGACCACGAGAGCCATGTAAGCACT  
GCCTACGGAATTCTTTTCCTTTACCCCTCCAGTACTCGTCGGCTCTGCGAGCCGTCTTCCTGGCAGTAGGGTTGGGGACATGACGCCAGACAAAATC  
GTCATACCGGTCATCCCAACCCTCTCGGAAAAGTTTAGAGACTTCCT

> Cb\_clean\_k141\_57307

TTTATGAAGAGGCGCTAGCACTTCGGACCGCTCCTCATAAATGAGTAGCGGTCTTAACCTGCCGGCCGACAGGACCTCCTTATACCGGGCTAACATG  
GGTCTCGGAAGACCACGAGAGCCATGTAAGCACTGCCTACGGAATTCTTTTCCTTTACCCCTCCAGTACTCGTCGGCTCTGCGAGCCGTCTTCCTGG  
CAGTAGGGTTGGGGACATGACGCCAGACAAAATCGTCATACCGGTCATCCCAACCGTATCGGAAAAGTTTAGAGACCTCCTTACGTACGAAACGAA  
GGTAGTCTGGAGAAGGGGGAGGGGGGTTAGAGAATGCGTTTCGCTTCCCAAGCGGAACGCACGGAGACACTGTGAAGGCGGCAACCCGACGGCAG  
GTTACGTTTAAGAGATGAGACGGAATGAGCAAATTCCCATCTCTCTCGCCTCCACAGTCTTTCAAGTCGGCAAAGACCGTCGACTCCCTGACGTTGC  
CGTCGAGGGAACCTTTACAGATGCTCTCTCCTTGCCGCTTAAAAGGAGATACGAGAGGAACA

> Cb\_clean\_k141\_5161

TGGAGATTGCTTGTCTTTCTCCAAGGCTGTGAAGGCGCTCCTTGCGGATTGCCCGTCCGACCTCGAAGAGGAACGGATGGCCTGGCAATCAACTAA  
GAAGCTCCTGCCTGCTTCGTGCAAGTGCATGGAACCTCCTTTGTTACAAGGGGTGGTCAATGGTTTTCGCGCGCCCTGCGCGAAGCCTTCCTTCTGGT  
TACCTTCAATTGTTGAGAAGGAGACCCGCCGCCTTTTTCCTAAGGCGTGGAATTCCGGTCTTTACGAAGAGAGGGTTCTTTCTACTTCTCCCGGCC  
TTTCTGGCACCGTTGACAACGTCCGTTTCAGACGGCGGTTGTCATGCCGATTGGAAAGGCAAGCATTCCGACTTCCTGGATGGCGCCCTTAGGGGCTA  
CTATCCGGGAGGTATCGAACGTTGTGCGGAGCTTATGGTAGTTCAATCTGCTGGTAAACCTCGTCCTCTGACGAAGTTTTCCGGGGAAACACTACTC  
CTCAAGCCTTTGCACACATCGATCTACGATCGGTTACGGAGCCAACTTTGGCTTTCCGTGGGCGACGTATCGGATTCTTCTCTTGCTAGAGCCGGGTT  
CAGCTCGAAGGATGGCGATGTCCTCACTTCTGGCGACTATAAGTCGGCAACTGACCAGTTGTCGATAGAAGTCGCAGAGAGGATCCTTGGCACCATT  
CTCGCCAATGCGATCTGTGTCCCCCTGGTCTTCGCGAGGAAGCCTTAAAGATCCTTCGGCCAATTCTCTTTTCATGAGAAGTTGGTTCCGAATGGTAT  
CGAGCCGCGAGTTGGACAGATGATGGGTAGCTTTCTTAGCTTCCCACTTCTCTGTCTCCAAAACCGCTTCGCCTTTTTGTGGGCGATGCGAGTTGGA

GGCTTAAGTCCTGCAGCTGCGGAAAAGGTTCCCTTGCTTGATCAACGGGGACGACATCCTGTTTCGTTCAACGCCTGCGTTGAGCGAAGTTTGGATG  
AAGACGGTTGGCGAGCTTGGTTTAGAGGTCGAGCGTACTAAGACGTCTGTCTCCCCAGTTTCGGTTCTCTGAACTCGACACTGTTACGTTGGAAA  
GGGGTTCACCTTCGGGTGATCCCTACCTTCGTTTCGGGAGACTACGATCTTCGCAGTACGTGAACTCGTTGTACGTGAGTTTCGACAGTTTGTCTG  
CAGGGTTTAAGTCGAATCAGCGCTTCCGCGCTGGCGTCGTCTTTTCCGCTGGCACCTTCTGCTCTTAGGTCAACTAGATTGACTCTGTTAGAGCTC  
GGGTTTCGCGGAAGCCTTGCTTGCAGACTTTCGATTCTCTTTCGGTTGGTCCCGGAGGAGCAGCCACGGTTTGAGGTTCCACCAGCCCCAGTCGGT  
CACAATGTGGTCGTTTCTAACGACCTTGCCGACTGGGTCCCCGAGGAATCTCTTCCCATGAGCTCTCCGTTCTCAACGCGAGGGAGACCGCTTCTT  
GGAAGTTCGGAAGTTCAGAACGACAGGGACAGGGCTACCATTCCGTAAGCTGTCTTCTGTCAGACGTCCTTGCTTTTCCTTTTC  
GGTCCGGGAGGGGTGGAGGAGTAGGTTGACTCCGGAAACAAGTGGCGAGCGTCTCAGACGTCTCAAGGCTTGTTTTCGACGCTTTAGAAAAGA  
AGGAAAAACGGTTGGCTCTTTTTCGGATTCTCATAGATTGGACCCAGTCCGATTCTTATGATTGTCCACCGAGCTACTCAGAGACCGTGGGGGGGGG  
TTTGGGGTCGCGCAGCTTGTCTCGCCGAGGACCCGCTTAAGAAGTGAACGGACACGCGGCCTTCGGGCCGGGCTGTAACGGCCAGCAATCCA  
AAACGGTCCGCCGGGATAGAATACTACTGAAAGAGTGACAAAGTTTTCCGGTGTGTGAGAAGGGGCATTCCCCGAACCGTAATTGGGAGAACT  
CCCGGACGAGGTAGCGCTAGACGAACGGTAACGCGTGTGGGCAGAAATGCACATGCGTAGTCCCTAGTAGTGGCAATACCCTTAGGAGATCTTTATG  
AGCGAACGTGGTGAGGCGGCTTAAATCCGCGGCCTGAAAAGTCAATATACAGGTGCTCTTCTGAGTGGAAGAAGGA

> Cb\_clean\_k141\_3984

TAATAAGTCTCGAACATGTCGAGCAAATTAAGTATCCAGTTTCCCTCATTGAAGAGGAAAATAATGGATGAGAGGGTCTGGTCCGAGATGACCAGTG  
TCCCTCTTTGGTACAACCCGACCGCAGATAGCGTTCGAGTTGTCCCGGATGCTCTCCTACCATACATGGAGGGGAAGCATTTCCTTTCGACAAAACA  
AGTGCCGTCGGCACTTATTTTGGCGAAGGCCGGTTCGTTGACAGTGTGACGGAACCGGTCCAATCTGTTCAAAAGAGGATTCTCTGTTGAACAGGT  
TGAAGTGGGATAATAATGGTGAATCCAAGATTATCTCAGTAGCCGGGCACGAAGGTGTAGCACCTTCGTAAGTTCGCGCTCGCTGTCCTCTTTTCTTAAAG  
AGTCCAGCGGCGTGATGGAGGCAGTTAGTGAAAACGCTGACTCCATCGACGAGGAAGCAGAACATTCCGGTTCTGAAACCTCGGACGTAGAAGGG  
TACTGCAAGGCAGTAGCTCTACTACGATTATTCGGAAGAAAGTACGAAATGTCCATGGAAACTCCATGCGGCAT  
GCGCACTCGCTACTCTCAGATCCGAACCCGGACCTGAGGTAGTCGTCTGGTCTGGAGACGGCATCCGTCTCCAAGACCCGCTCCACCTAGGTTGTT  
TGGACCGAAGTGGGATGGATCTCTGCGAAACAAGTTAAGGTTTACAAGATCGCGGATGGTAACGTGAAATCTCACGTTATCTACCGACACACTCA  
CTGGGGACGACGTCTCCAGCGAGAGTGCGCAGACCCAGAGTCTAAAATTAGATACTGGGCCTGTACCCTCCGCAGCCGAATTAATCGGTTTTTGGC  
GGGTAAATCCGATCCCATCTGGACTTCAGATGAGAAAAGGATTCTGTGCGGGGACGGGTCTTATCAGACCCGTGACCGTGCAGCACGGTCGTTAAG  
GTTGCTTGAAGTCTTAAAGACCGTGGACGGGGTATTACACAGAGATATCTGGCGAACCCCGCTGAAGTGTGGACATGGGACAGATACGACCTGTT

CACACTTGGAACCTCTATCCCTATTAATAGGAGACGAGTTCTTAGACGGCGAACTACCTCTAGAGGTATTACCCGTCAGCACTTCCTATTCCACACTTA  
AGTGGACTAGAAAAGTGGTTCAAGAAGGTGTCTCATAGAGATCTTCTGGAACGTGAGACCAAGCCCCCGCCGAAGGGCAGGAATGGTCTCGGCTG  
CTTTGGAGAACATGGAAGGTCTTCAATCAGCCTCGGGATACGAGCGCCTATTGATAATAGGCATTCTATCTCAGACTAGGGGTTGCGGTACACCGCC  
ACCACTGGTCGTACTCCAATCGAAACGGAAATTCCTCGAGACCGTTTCGCTGGAGCCCCCGAAGAGAGCGCCACAGTGCGCTCCCTCCGGAGGAT  
GGCAGTGCAGGAGGTTTTGGAAAACCTCCCGCCTGTCGCCGTGACAGGACTCGCGACCAAGTCGCGTGTAAGTGTACGTCCGCCGCTTGCTGGG  
AAAAGACCCGGAAAGAAGGCGGAACGACGGAGCAGATCAAGCAAATGATCTGCGACCTCGATCCTATGTCCCAAGTTCCCGTGAGGAACCTGGAC  
ACAGGTAGGGTCGAACGCTGGAAGTTCAGGACGAGTTCGACTCTGTTGGAGAACTTATATTCTGGGTCAAGTCTTGACCGAGTTCTCCACACACCA  
CCAGTGGAGCTTCGCAAAGCTTTTCTCACTGTGGTGAAGGAGCCTGGTAAAGCTAGAAGCGTTACCAAGGCCCGTGCTTGCCTCAAGATCGTGCTC  
GATCTTGTTAGCAAGTTATGCTCTGAGCCCTTTATAAAAGGAATCAGAAGCAGCCAGTCTGGAATGAGCGCATCAAACCACGGCTGGAACTTTTTCA  
ACTCATTCTCGAATGAGATTGAAAAGAGAAGAGACGTTTTCTCTTTTATCAAGAGAAGAACGCTCGTTCGAAGGGTATGTTGAACGAACAGATACCTT  
CGAAGACCTCTATGTGTCCTCCACGGACTACAGTGAGGCTACCGACCGGCTCCAACACCAAGTTGGAATCGATCTGGGAGTGCCTTTGATGACCAA  
ATGTGGTATACCAAAGTACTGCAGGGTATTGTAGTAGAACTTGCTACAATACCAGGCAGATCTACTTCAAGGCCACTGGCCTTTTGAAGATCTG  
GGTGAGCGTACGGATTCCGAAGGAATCCACGTAATCACCTTCGTCAAGGTGTCCTCATGGGGGACCCCTTGACGAAACCGGTCCTACACCTGATTA  
ATGTGTGTGACCGGCTCCTGCAAAAGCGGCTCCTAGAGCCCGACTTTTACGGCAGGTTGGGAAATTTCCATGAAATTTCCCAACTTCTCTCACGCGT  
TAAGAGTAACTTAACGAGTGAGATCTATCCGTGGTTGAGATTTTAGACTCACCTGCGGGTAACGTATAGCCCCTAACTGGGGAGCATTACGTTACG  
TTAACTTAATAAGTCTTG

> Cb\_clean\_k141\_57522

TCCCCTCCCATACCTGGAGGGGAAGCATTTCCTTTTCGACAACACCAGCGCCGTCGCCAATTATTTTGGCGACGGCCGGTTCGTTTACAGGGTCAGCG  
AACCGGTCCAATCTGTTCAAAAAGAGGATTCTCTGTTGAGCAGGTTGACTGGGATAATAATGGTGAATCCAAGATTATCTCAGTAGCCGGGCACGAAG  
GTGTAGCACCTTCGTACTCGGCGTCGCTGTCCTCTTTTCTTAAAGAGTCCAGCGGCGTGATGGAGGCAGTTAGTGAAAACGCTGACTCCATCGACGA  
GGAAGCAGAACATTCCGGTTCTGAAACCTCGGACGTAGAAGGGTACTGCAAGGCAGTAGCTCTACTACGATTATTCGGAAAAGAAATCGACTTTC  
TCACCGAATAAAGTACGAATGTCCATGGAACTCCATGCGGCATGCGCACTCGCTACTCTCAGATCCGAGCCCGGGCCTGAGGTAGTCGTCTGGTCT  
GGAGACGGCATCCGTCTCCAAGACCCGCTCCACCTAGGTTGTTTGGACCAAAGTGGGATGGATCTCTGCGAAACAAATTAAGGTTTCACAAGATC  
GCGGATGGTAACGTGAAGTCTCACGTTATCTACCGACACACTCACTGGGGACGACGTCTCCAGCGAGAGTGCGCAGACCCAGAATCTAAAATTAGA  
TACTGGGCCTGTACCCTCCGTAGCCGAATTAATCGGTTTTTGGCGGGTAAATCCGATCCCATCTGGACTTCAGATGAGAAAAGGATTCTGTGCGGGG



ACGGGTCTTACCAGACCCGTGACCGTGCAGCACGGTCGTTAAGGTTGCTTGAACCTCTTAAAGACCGTGGACGGGGTATTACACAGAGATATCTGG  
CGAACCCCGCTGAAGTGTGGACATGGGACAGATACGACCTGTTACACTTGGAACTCTATCCCTATTAATAGGAGACGAGTTCTTAGACGGCGAACT  
ACCTCAAGAGGTATTACCCGTCAGCACTTCCTACTCCACACTTAAGTGGACTAGAAAAGTGGTTCAAGAAGGTGTCTCATAGAGATCTTCTGGAACGT  
GAGACCAAACCCCCGCCCCGAAGGGCAGGAATGGTCTCGGCTGCTTTGGGAGAACGTGGAAAGTTCTTCAATCAGCCTCGGGATACGAGCGCCTATTG  
ATAATAGGCATTCTATCTCAGACCAGGGGTGCGGTACACCGCCACCACTGGTCGTA CTCCAATCGAAACGGAAATTCCTCGAGACCGTTTCGTTGG  
AGCCCCCGAAGAGAGCGCCACAGTGCGCTCCCTCCGGAGGATGGCAGTGCAGGAGGTTTTAGAAAACCTCCCGCCTGTCGCCGTGACAGGACTC  
GCGACCAAGTCGCGTGTAACTGTCACGTCCGCCGCTTGCTGGGAAAAGACCCGGAAGAAGGCGGAACGACGGAGCAGATCAAGCAAATGATCT  
GCGACCTCGATCCTATGTCCCAAGTTCCCGTGAGGAACCTGGACACAGGTAGGGTCGAACGCTGGAAATTCAGGACGAGTTGACTCTGTTGGAG  
AACTTATATTCTGGGTCAGTCTTGACCGAGTTCTCCACACACCACCAGTGGAGCTTCGCAAAGCTTTCCTCACTGTGGTGAAGGAGCCTGGTAAAGC  
TAGAAGCGTTACCAAGGCCCGTGCTTGCCTCAAGATCGTTCTCGATCTTGTTAGCAAGTTATGCTCTGAGCCCTTCATTAAAGGAATCAGAAGCAGC  
CAGTCTGGAATGAGCGCATCAAACCACGGCTGGAACCTTTTTCAACTCATTCTCAAATGAGATTGAAAGAGAAGAGACGTTTTCTCTTCTGTCAAGA  
GAAGAACGCTCGTTCGAAGGGTATGTTGAACGAACAGATACCTTCGAAGACCTCTATGTGTCCTCCACGGACTACAGTGAGGCTACCGACCGGCTC  
CAACACCAAGTTGGAATCGATCTGGGAGTGCCTTTGATGACCAAATGTGGTATACCAAAGGTACTGCAGGGTATTGTAGTAGAACTTGCTACAATA  
CCAGGCAGATCTACTTCAAGGCCACTGGCCTTTTGGGAAGATCTGGGTGAGCGTACGGATTCCGAAGGAATCCACGTAATCACCTTCGTCAAGGTGT  
CCTCATGGGGGACCCCTTAACGAAACCGGTCCTACACTTGATTAATGTGTGTGACCGGCTCCTGCAAAAGCGGCTCCTAGAGCCCGACTTTTACGGC  
AGGTTGGGGAATTTCCATGAAATTTCCCAACTTCTCTCACGCGTTAAGAGTAACTTAACGAGTGAGATCTATCCGTGGTTGAGATTTTAGACTCACC  
TGCGGGTA

> Cb\_clean\_k141\_40198

TCGTTACCATCGCTTTGGTGACGACTTAGACGTCGATCTTGCCACCCCTACGACCACTCCTGCATCTCTCGCTGTTGCGTCTGCGCGACATATCCCAT  
CTGCGGCCGCGACCCAGGAAACAATACCGAAACGGCCTCATCTCCGCATCAGCAGCCAAGGAGCCTACACCCGCATACCATGTTATAGCCGTGTGG  
ACGTCTTCCCAGCCCTGTCAACACACCCATCTGCGTCGAGCGACTTCTACCATCCTGCGCTAAGCGCCTGCGCCGCCACTCTGGCCGCTCAGTCGCG  
CGCCGCTGCTGTGCGCCTCGCAACTCAAAGCACACCGCCGGCGACAGCCATGTGCTCGACCACCTCGAGCGCTCCGGCGTCGACCACCACCGGC  
ACCGACACCGGTAAAGGCGGACCCACGAGCTCGCCGCTGTTGTTCTTCGTCGCCCTCGGATTCGGTGTAGTCTTTACGAACCTATGGATCATCGTCG  
GCGTAAAATACTGCTTCAGATATAACCAACGCAATCGTGCAGCGCGTGCCTTGAACGAAAATGGCGAACCCATTGACCTTGCGCAAATGCCGCACCC  
GAGACGGAGGAGGCGCGAGAAGAAGCTCATGTCCATGGAAGATGTGAACGAGCGCTTCCCATGATCAAGTACAAGACATGGCGATCATCGCGCG

AAGCCCAAGGCCTTCCTGCAGAGGGTGGAGTGACCGCACCGACCAGCAGAGCTGGGAGTATGAGAGACGAAGAGGGTACGATTGAAGCGTTTGG  
CAAGAACTCCGTCGATACCGCACGGCCTGGAACGGCGCTCAGCATCGCACAGAAGGATCACGAAAATGCGCTTGGGGACCCACCGAAAGCGCAAG  
CTACTGCCAGCGGAGAGAAGGGGGCCGGAATGGTTACCATCGAAGATATGGAGAAAGCCAGGAAGAGGAGCATTGATCGAAACAACTCGGCTGTC  
ACAGATTTGGACGACGACGAGGACGACCCAATAGCAACGGCAGCGCCACCTGAGATGCTTGCTGCACCTGGTGACACATGCGCCATCTGCCTGGAT  
AACCTCGATGATGACGACGATGTGCGAGGGCTCACATGCGGGCACGCATTTACGGATCCTGCGTCGACCCATGGCTCACAAGTAGGAGGGCTTGC  
TGTCCACTTTGTAAAGCCGACTACTATGTGCCCAAGCCCAGGCCGGATGCAGACGGGGCCAATGCAGCCGCAGCTCGCAACGGCCGGTTGCCTCAA  
GAGCCACCTCCAGCACGACGACACGGTCTGCCATTTGCACCGCGCGTAATGCTCTTTGCCACACCACGCTTCTTTGTCAGCGACGGAACACGCGCG  
GAGCAGCCGAATCCAGCAGCTGCAGAACGTGCACGGCGAGAGCGGGACGTTTATCAGGATCCCGCCATTCAAGCAGAACCCACATCGCGAAGCTG  
GAGGTGAGGATGTTGAGGTGTTCCGCAAGCTGACCGGGACCGTCATATCTCCAGCCATTGACAGCAATCTTGCCCTTTGCCGTCCACATTTCTTATGTC  
GATGGTGACAATTTTCGTCCGAGGTAGAATTGAATGGCCCGAGCAAACCTGCGTAATGAACTTCACTTTGGTTTCGAGGGGAGCAGGGCCGGGTGG  
CAGTGATTTGGGATCAACTGGTTGAACATGTGAGCAAATTAAGTATCCAGTTTCCCTCATTGAAGAGGAAAATAATGGATGAGAGGGTCTGGTCCG  
AGATGACCAGTGTCCCTCTTTGGTACAACCCGACCGCAGATAGCGTTTCGAGTTGTCCCGGATGCTCTCCTACCATACATGGAGGGGAAGCATTTCCT  
TTCGACAAAACAAGTGCCGTCGGCACTTATTTTGGCGAAGGCCGGTTCGTTGACAGTGTGACGAACCGGTCCAATCTGTTCAAAAGAGGATTCTC  
TGTTGAACAGGTTGACTGGGATAATAATGGTGAATCCAAGATTATCTCAGTAGCCGGGCACGAAGGTGTAGCACCTTCGTACTCGGCGTCGCTGTCC  
TCTTTTCTTAAAGAGTCCAGCGGCGTGATGGAGGCAGTTAGTGAAAACGCTGACTCCATCGACGAGGAAGCAGAACATTCCGGTTCTGAAACCTCG  
GACGTAGAAGGGTTACTGCAAGGCAGTAGCTCTACTACGATTATTCGGAAGAAATCGACTTTCTCACCGAATAAAGTACGAATGTCCATGGAAC  
TCCATGCGGCATGCGCACTCGCTACTCTCAGATCCGAGCCCGGACCTGAGGTAGTCGTCTGGTCTGGAGACGGCATCCGTCTCCAAGACCCGCTCCC  
ACCTAGGTTGTTTGGACCGAAGTGCGATGGATCTCTGCGAAACAAGTTAAGGTTTCACAAGATCGCGGATGGTAACGTGAAATCTCACGTTATCTAC  
CGACACACTCACTGGGGACGACGTCTCCAGCGAGAGTGCGCAGACCCAGAGTCTAAAATTAGATACTGGGCCTGTACCCTCCGCAGCCGAATTAAT  
CGGTTTTTGGCGGGTAAATCCGATCCCATCTGGACTTCAGATGAGAAAAGGATTCTGTGCGGGGACGGGTCTTATCAGACCCGTGACCGTGCAGCAC  
GGTCATTAAGGTTGCTTGAACCTCTTAAAGACCGTGACGGGGTATTACACAGAGATATCTGGCGAACCCCGCTGAAGTGTGGACATGGGACAGAT  
ACGACCTGTTACACTTGGAACCTATCCCTATTAATAGGAGACGAGTTCTTAGACGGCGAACTACCTCAAGAGGTATTACCCGTCAGCACTTCCTAT  
TCCACACTTAAGTGGACTAGAAAGTGTTCAAGAAGGTGTCTCATAGAGATCTTCTGGAACGTGAGACCAAGCCCCGCCCCGAAGGGCAGGAATG  
GTCTCGGCTGCTTTGGAGAACATGGAAGGTTCTTCAATCAGCCTCGGGATACGAGCGCCTATTGATAATAGGCATTCTATCTCAGACTAGGGGTTGCG  
GTACACCGCCACCACTGGTCGTACTCCAATCGAAACGGAAATTCCTCGAGACCGTTTCGCTGGAGCCCCCGAAGAGAGCGCCACAGTGCGCTCCC  
TCCGGAGGATGGCAGTGCAGGAGGTTTTGGAAAACCTCCCGCTGTCGCCGTGACAGGACTCGCGACAAAGTCGCGTGTAAGTGTACGTCCGCC

GCTTGCTGGGAAAAGACCCGGAAGAAGGCGGAACGACGGAGCAGATCAAGCAAATGATCTGCGACCTCGATCCTATGTCCCAAGTTCCCGTGAG  
GAACCTGGACACAGGTAGGGTCGAACGCTGGAAGTTCCAGGACGAGTTCGACTCTGTTGGAGAAGTTATATTCTGGGTGAGTCTTGACCGAGTTCT  
CCACACACCACCAGTGGAGCTTCGCAAAGCTTTTCTCACTGTGGTGAAGGAGCCTGGTAAAGCTAGAAGCGTTACCAAGGCCCGTGCTTGCCTCAA  
GATCGTGCTCGATCTTGTTAGCAAGTTATGCTCTGAGCCCCTTTATAAAAGGAATCAGAAGCAGCCAGTCTGGAATGAGCGCATCAAACCACGGCTGG  
AACTTTTTTCAACTCATTCTCAAATGAGATTGAAAGAGAAGAGACGTTTTCTCTTTTATCAAGAGAAGAACGCTCGTTCGAAGGGTATGTTGAACGAA  
CAGATACCTTCGAAGACCTCTATGTGTCTCCACGGACTACAGTGAGGCTACCGACCGGCTCCAACATCAAGTTGGAATCGATCTGGGAGTGCCTTT  
GATGACCAAATGTGGTATACCAAAGGTACTGCAGGGTATTGTAGTAGGAACTTGCTACAATACCAGGCAGATCTACTTCAAGGCTACTGGCCTTTTGG  
AAGATCTGGGTGAGCGTACGGATTCTGAAGGAATCCACGTAATCACCTTCGTCAAGGTGTCCTCATGGGGGACCCCTTGACGAAACCGGTCCTAC  
ACCTGATTAATGTGTGTGACCGGCTCCTGCAAAAGCGGCTCCTAGAGCCCGACTTTTACGGCAGGTTGGGAAATTTCCATGAAATTTCCCAACTTCT  
CTCACGCGTTAAGAGTAACTTAACGAGTGAGATCTATCCGTGGTTGAGATTTTAGACTCACCTGCGGGTAACGTATAGCC

> Cb\_clean\_k141\_72534

TAAGTCTCGAACATGTCGAGCAAATTAAGTATCCAGTTTCCCTCATTGAAGAGGAAAATAATGGATGAGAGGGTCTGGTCCGAGATGACCAGTGTCC  
CTCTCTGGTACAACCCGACCGCAGATAGCGTTCGAGTTGTCCCGGATGCTCTCCTACCATACATGGAGGGGAAGCATTTTCTTTCGACAAAACAAGT  
GCCGTCGGCACTTATTTTGGCGAAGGCCGGTTCGTTGACAGTGTGAGCGAACCGGTCCAATCTGTTCAAAAGAGGATTCTCTGTTGAACAGGTTGA  
CTGGGATAATAATGGTGAATCCAAGATTATCTCAGTAGCCGGGCACGAAGGTGTAGCACCTTCGTACTCGGCGTCGCTGTCCTCTTTTCTTAAAGAGT  
CCAGCGGCGTGATGGAGGCTGTTAGTGAAAACGCTGACTCCATCGACGAGGAAGCAGAACATTCCGGTTCTGAAACCTCGGACGTAGAAGGGTTA  
CTGCAAGGCAGTAGCTCTACTACGATTATTCGGAAGAAATCGACTTTCTCACCGAATAAAGTACGAATGTCCATGGAAACTCCATGCGGCATGCG  
CACTCGCTACTCTCAGATCCGAGCCCGGACCTGAGGTAGTCGTCTGGTCTGGAGACGGCATCCGTCTCCAAGACCCGCTCCCACCTAGGTTGTTTG  
ACCGAAGTGGGATGGATCTCTGCGAAACAAGTTAAGGTTTCACAAGATCGCGGATGGTAACGTGAAATCTCACGTTATCTACCGACACACTCACTG  
GGGACGACGTCTCCAGCGAGAGTGCGCAGACCCAGAGTCTAAAATTAGATACTGGGCCTGTACCCTCCGCAGCCGAATTAATCGGTTTTTGGCGGG  
TAAATCCGATCCCATCTGGACTTCAGATGAGAAAAGGATTCTGTGCGGGGGCGGGTCTTATCAGACCCGTGACCGTGCAGCACGGTCATTAAGGTTG  
CTTGAACCTCTTAAAGACCGTGGACGGGGTATTCACACAGAGATATCTGGCGAACCCCGCTGAAGTGTGGACATGGGACAGATACGACCTGTTTACA  
CTTGGAACCTCTATCCCTATTAATAGGAGACGAGTTCTTAGACGGCGAACTACCTCAAGAGGTATTACCCGTCAGCACTTCCTATTCCACACTTAAGTG  
GACTAGAAAGTGGTTCAAGAAGGTGTCTCATAGAGATCTTCTGGAACGTGAGACCAAGCCCCGCCCCGAAGGGCAGGAATGGTCTCGGCTGCTTT  
GGAGAACATGGAAGGTTCTTCAATCAGCCTCGGGATACGAGCGCCTATTGATAATAGGCATTCTATCTCAGACTAGGGGTTGCGGTACACCGCCACC

ACTGGTCGTA CTCCAATCGAAACGGAAATTCCTCGAGACCGTTTCGCTGGAGCCCCCGAAGAGAGCGCCACAGTGCCTCCCTCCGGAGGATGGC  
AGTGCAGGAGGTCTTGGAACCTCCCGCCTGTCGCCGTGACAGGACTCGCGACCAAGTCGCGTGTA ACTGTCACGTCCGCCGCTTGCTGGGAAA  
AGACCCGGAAAGAAGGCGGAACGACGGAGCAGATCAAGCAAATGATCTGCGACCTCGATCCTATGTCCCAAGTTCCCGTGAGGAACCTGGACACA  
GGTAGGGTCGAACGCTGGAAGTTCCAGGACGAGTTCGACTCTGTTGGAGAACTTATATTCTGGGGTCAGTCTTGACCGAGTTCTCCACACACCACCA  
GTGGAGCTTCGCAAAGCTTTTCTCACTGTGGTGAAGGAGCCTGGTAAAGCTAGAAGCGTTACCAAGGCCCGTGCTTGCCCTCAAGATCGTGCTCGAT  
CTTGTTAGCAAGTTATGCTCTGAGCCCTTTATAAAAGGAATCAGAAGCAGCCAGTCTGGAATGAGCGCATCAAACCACGGCTGGAACCTTTTCAACT  
CATTCTCGAATGAGATTGAAAGAGAAGAGACGTTTTCTCTTTTATCAAGAGAAGAACGCTCGTTCGAAGGGTATGTTGAACGAACAGATACCTTCGA  
AGACCTCTATGTGTCCTCCACGGACTACAGTGAGGCTACCGACCGGCTCCAACACCAAGTTGGAATCGATCTGGGAGTGCCTTTGATGACCAAATGT  
GGTATACCAAAGGTACTGCAGGGTATTGTAGTAGAACTTGCTACAATACCAGGCAGATCTACTTCAAGGCCACTGGCCTTTTGGAAGATCTGGGTG  
AGCGTACGGATTCCGAAGGAATCCACGTAATCACCTTCGTCAAGGTGTCCCTCATGGGGGACCCCTTGACGAAACCGGTCCTACACCTGATTAATGT  
GTGTGACCGGCTCCTGCAAAAGCGGCTCTTAGAGCCCGACTTTTACGGCAGGTTGGGGAATTTCCATGAAATTTCCCAACTTCTCTCACGCGTTAAG  
AGTAAACTTAACGAGTGAGATCTATCCGTGGTTGAGATTTTAGACTCACCTGCGGGTAACGTATAGCCCCTAACT

> Cb\_clean\_k141\_15570

GGGTCGGTGGTTCGTCGCGGAGGACATGATTGCATGTTACGGCTAAGAATAAATGGCCCTACTTAATTGCTGGTGTGACCATCATCACTAGCCTGAC  
AATTGAACCACTCCTCTGCGACGACCACCGACCCACATTGCTCATGCGGTTATGGCGATGCCCGATATTCCCTCTTTTCAGTGAAGACGTTAGTGGAG  
AAGTCAGAGACGTGCGCAGGTCGAAGTTGAGCTTAGGTGCGGGGTGGCAACGGTTGTGGTGGAAAGCGGCGTGTGGGAGGTGCAGACATGGTATTG  
CGCTGGAGCTGGAGGCGTGTGTCGTCGATGCTGTAGAGCAAAGGCGCTCGCCGTTTCCAGGCGATTATATACAGTGTGCGACTAGACCTTCGATATCTCC  
TTCACGGCTGCCGATGGCGCATTCTCAACATGTCGTGCTTACCAAAGCCCCGACCGGCCCTTATGGTAGATGGTGAAAGGCGACTCTGTTTCGTCCT  
AGTCCCTAAATGGCATTGTCCACCACTCTTTGGGGGCATTGACTTCTTCCATCCCGCCATCATTCACGCGTGGCCATAGTGCACTCTGCACGGTGTAT  
AAATTATAACGTTGCTCGGCGAGGTTGTTTGCCACAGATGGCATCCCTTCATCATCGCTCGTCAGTCATATTCTTTTCGTGTGTGCTCTAGCTCAAGC  
TGGTTGTTCCCTGTCCAAATCGTGCTTGAAAAAGCAGCCGGCAGCCATCTTATGCGTGTACGCATTGGCCACGGAGTATAGTGATGGTTCATTGCT  
CTGCAAGCTTTCGTGAGGCCCGTGACACCGCCTTGCTCATGGTTGATATAAAGCGGAGGTCATCATGTACTCCGAATTCTGAGACACGCTCAGCACC  
CGCTCTTGCAAGTAAGGCGTGAAGGAGCTGAAGTTCAGTGTTCCCTTCTGACCATAGAGCATGTGCGACAAAGATGTGCTGCCGTTGCGCGCTTGT  
CTCGATCAGACAAGCGTCTTTTACGAAGGAGAGTCGAACTACCCATGTGCTCTGTGATTGGGCCGCGCTCATTCAGCAAGTCGACAACCTTCCTGA  
CCGTCTCTTTGATCGACTCTGCCCATGTCATGATCCTGTTTCGGCATGTGGTATTCCATACTCCGGAGGCCGCGTGTGCGACTGGGAATGTCGAAGCCTG

CGCACTCGAATTCGTCGAGCAAATTAAGTATTGAGTATGAATTCATTTAAGAACTATTACTCAATCCTAGACGAGGAAGTCTCCGACTTCACCGCCTG  
GGATCCCTGCGAGGTCATGCAAGACATGGCACCGCAGAGTCTGGAAGTCTGTACAAGTATCTTGTACAGATGTTTCTGTGCGGACGCTCACCTTTGT  
AATGAATGGGAGCTCCCGACCTTCGTATCCGACGACGTCAACGTCTTCGGAATGGAGGTAGGGGACGACCGCACCGACGCGAGTCGCAACCCCTAT  
AAACTTGCGCTTGGGCTGATAGCCCAAGAACAAGTTTTGTCATATGAAAACGTCTGATGAGGACACTTTCATATCGCATTCAATTTGGAATTTCTGCGA  
AATTTCAAATGGAATACCTGCAGATATCACTGAAACCTTTGATTTCTGTAGGAAGAACGGCGACTTCGAGAAGCTCGGATTCGTGATTCTCCTCCTT  
TGCGGATCATCTTGGATGTCAGCAAAGGAGATGGCAGTCATTCTTCGACATCGTCGGGAAAGGCTGCTATGCTGGCCTCGAGGATGCGCACCCCGA  
GGACCAGTATGCTGCGAGTTTTAAACCTCGCAAGCTTCATGCAGGACGGAATGCTCCGAACTAGCATGAATTCGACCCAAAATACCTACCAAGGAT  
AATGGGCGGATCAGGTGCCCCGGGCGTTGTTTGACAACCCCGAGAACTTGTACCTCTACACTCTTGCATACAAGGGTGGTAGATGTAACAGGGTTTAC  
GGGTCGGCGACTCGTGAACTCCAGACGTGTCTTGCAGAGCTATCACGCTCTAAAGCCACGATGCCGGTGCTGTGCAGAAATGCTTAGCGACCGGCAA  
GAATATCTTCACGGAACGTATTCCAACATGATATTCGCTCCAAAGCTATCATTTAAGGATAGTCAAATGGAGAAGCTCCCGGCTCCTCTAATAGAGTC  
ACCGGGAGGTGCAAACCGGTTCAATGCATCATTGAACCGGCTTGTCCGCACGAAGCACCTAGTTACTAGGTCCTCCGCGCTTCGCGAATGGCAATAT  
TCCAAAACCATTCGTGCGCGCCTTCTGTGCGAGATTATCGACAGAGAGGTACGAGTCCGAGGACCTGCTGCGAAAGCAGGCTCTTAGGAAGGCGTTC  
GGGTGTGCACTCAGTGCAAACACCGCGTTCGCTAACATGCTTTCCAGGAAGGCCACCTGGAAAGATGTTGAGACGTTAATGCAATCGGAGAACCAC  
ATTACATTAACGTCCGGATCACCTGAGTTCACATTATATGATGCTCAGTGGATCTGCTCCGGTGCGAAGTATGAAAACCTCAGCATCGAAGACCTGAC  
GATCACGGAGGATTTACTCTCGTGAAGACGTGACGAGGAACAAACCTTCAAAGTTGGTGGTATTGTCCTCCGTCCCATCATAGGCAACAAAATT  
GCCCCATGTTGAGACCTCGACCCGCGTTGGTCTCTACGAGATCAACGGGTCGATGCAGGAGTGGGCTAATGATCTTCATAGCCGGCTCCTCTCTCATC  
GCGTCGACGGTAAACCGCTTCGACGCGACGATGTAATCACCGAGATCATGAAAGATCCCGAGTGGGTAAACGACGACACAGGACTAATAGAAATGT  
GTCTTCGCGACACTCAGTCACTCCATCAAAGGAGTGCTAGAGTGGTTCTGGTCTCGCTCGACAAGCGTCTCGCGAACCAGATGTCCAACACTTGTA  
ATGTACAAGTGGAAGACTACCCCCGTTGGCGTACATTGTACGTATGATGGAGGAAGGCCTGGATCCTATCAAAGATAGGGACAAAGCCTCTCCTCT  
CCTGTCAGGCTCAATACCTAGCAGAGAGAGGTTCGGACCCGATCCGCGCGTTCTACGTGGATACGGGTTCTGTTGCCCATGTTCTTACCAATCTAGAA  
GAATATGAGCAAGCTGCTTCCGGTTTTCGTAAATTTACGAAAACGGGAACACGTGGACAGAGGGAGCAACAAAGGCTCCCGCTGGACACAGTACGT  
TCTCAGGGATATCCCTGATCGCGTGCTCGCTCTCAATACAACGCCCCGTCAGGCCCATATTGAGAGACCGGAAGTTCCCCACTCACAGAGTCGGAGA  
GCCTCTTTCCGCACAAACAGTTGGAGAACTGAGAGTGCGGCTAGTCAGACCAGGGTGTAAGGACCCTGGGACTGACTACTATCCCGACCTGGCATT  
TAAGAGCTGGTTTCGGGGTAACGTATAGCCCCTAACTGGGGAGCATTTACGTAAAAA

> Cb\_clean\_k141\_3161

CTTGAAACGGCAGCCAGCTAAGAGTTTCGGCAAGAGGGGCGGGTTATCGAGATCGACGACTGACTCTACCAGGGAGCCCTGGAACGCAAGTAAGAC  
TCCGAGGGCGGAGGAATGGCCGTTTTATCCCAGACCAGAGAAGAAACCGCAGATACTATTCTAGACCAAACAACCAGTCCAATAAGCCTTGCTAT  
GGACCTCAACTTATGAAGCTCAACGTAACCTCAGAAGGGTCGCAAGATCAAAGGAAAGCCCAAGAAGAAACAAGGTAGCGATAAGACTTGTTACGA  
TTGTGGCAAACCAGGCCACTTCGCGAGAGATTGCCGTTTGAAGAAGATGGTGCAGCGGCAGCCTTTCAACACGATGCAAAGGATAGAAGAAGGTC  
GAGGGGCCTATCACGACAATAGATCGCCCCAGCAAATCCGACTCCTAGGCATGATGACCCAAAAGCGCAAACGGGAAGAACTATCGAGGAAGCC  
CGTCAAGTCAAGGAAGATAAAAGACTCCAAGCCCTTCTCGGCAAGGACAAGAATGCGCCAACCTCCGAAAGGAAGAAGGAGCAACACGAGCCAA  
GGACATTTCGGAATGATGCAGCGACGAAATATCCCGAACCAAGTCCTCTGGGAACAGCGTAACGAACATGGAAGCCTTCACTGGCGATTCTGTTACG  
ACGATACATGCCAAACACACGTATCTTCCAAGAGGGAGAACAATTCTATCCGGTGGGACCATTGTGGGAAGAAAATCCTCCAATCCGGCGATATGA  
TGACGGAAGTAGGCCATTGCCTGTTCCAGAGGAGCTACAAGATCTAGCGCCACACCTCAGACTCGCTGCTAACGAATCTTGTTGCGAAACCCCAGA  
GAATATCCACCTGAAAAGGAGGAAGAACAAGACTCGTCTGCAGAAGAAGACACGACGGCCGAGCCATCTGACGAAGAAGCAGACCAAGATGAC  
GAGATCACAACATCCACATGTACCTAAACATGGATCATGCGAGAACTTGAGCTATTTCTGGCTATACGACAAGAGCAAATATTCCCAAGGATCGGAA  
ACAAGCGATACTTACACCCGACCAAGTTCGACCGAGCCCTAAGAGAGCATCTAACTAAGCTCTGGAACCAACCATGAATCTTGATACAATACGACTT  
CAGGACGCTCATACAAGAACTTTTTTCGCATCGGAAGCACAATCGCGCCATTACGATGTGTTCATGCCAAGCGAAGAAGCTCGTACTAAATCAGGTATGG  
GAAAGCATACGCCAAATCTTGAAAAGATACGTCATGCTACAACATTGCCAATGCACATACGCTTGCAATTGAAACAGCAGAAGAAAGAGCAATTGAC  
CAAATGGTTGAACACACGTCACATCAGATCCACTAGTGGCATGCAACACCAATCACCGAGATCCAATCGGGAAAAGGATCGACTCTCAAGGAACGA  
GCGTCCCAAGAGAGTTCTGCAACATTGAAAGTGCTCAAGCATCAACATTAGTCTTTTCGCACCAACATTACCGTCAACGGACACAAATTTCAAGCCAT  
GATCGATTCTAGAGCAAGCGGGAACTTTGCCCTTCTGATCATTCGTGAAGCGATATGTGATAGCTACCCAGTCGAAGGACGTCGGGTACGAATTGACC  
GCGGAACCAGGCCTTGTTTCATTTCCTTGCCAGAGAAGATGACATAAGGTGGTACAGACCAGCCTTTGGCATTAAACACAGGCAATAACAGTTTGCCAT  
TGTGTTGAATCAGAAACCAAGGCTTTAGGTCGTTGCCTACGCTCTGTGCCAGTGAC

> Cb\_clean\_k141\_38712

GAGGGCCCTTGAAACGGCAGCCAGCTAAGAGTTTCGGCAAGAGGGGCGGGTTATCGAGATCGACGACTGACTCTACCAGGGAGCCCTGGAACGCAA  
GTAAGACTCCGAGGGCGGAGGAATGGCCGTTTTATCCCAGACCAGAGAAGAAACCGCAGATACTATTCTAGACCAAACAACCAGTCCAATAAGCC  
TTGCTATGGACCTCAACTTATGAAGCTCAACGTAACCTCAGAAGGGTCGCAAGATCAAAGGAAAGCCCAAGAAGAAACAAGGTAGCGATAAGACTT  
GTTACGATTGTGGCAAACCAGGCCACTTCGCGAGAGATTGCCGTTTGAAGAAGATGGTGCAGCGGCAGCCTTTCAACACGATGCAAAGGATAGAA  
GAAGGTGAGGGGCCTATCACGACAATAGATCGCCCCAGCAAATCCGACTCCTAGGCATGATGACCCAAAAGCGCAAACGGGAAGAACTATCGA

GGAAGCCCGTCAAGTCAAGGAAGATAAAAGACTCCAAGCCCTTCTCGGCAAGGACAAGAATGCGCCAACCTCCGAAAGGAAGAAGGAGCAACAC  
GAGCCAAGGACATTTCGGAATGATGCAGCGACGAAATATCCCGAACCAAGTCCTCTGGGAACAGCGTAACGAACATGGAAGCCTTCACTGGCGATTCT  
TGTTACGACGATACATGCCAAACACACGTATCTTCCAAGAGGGAGAACAATTCTATCCGGTGGGACCATTGTGGGAAGAAAATCCTCCAATCCGGC  
GATATGATGACGGAAGTAGGCCATTGCCTGTTCCAGAGGAGCTACAAGATCTAGCGCCACACCTCAGACTCGCTGCTAACGAATCTTGTTGCGAAAC  
CCCAGAGAATATCCCACCTGAAAAGGAGGAAGAACAAGACTCGTCTGCAGAAGAAGACACGACGGCCGAGCCATCTGACGAAGAAGCAGACCAA  
GATGACGAGATCACAACATCCACATGTACCTAAACATGGATCATGCGAGAACTTGAGCTATTTCTGGCTATACGACAAGAGCAAATATTCCCAAGGAT  
CGGAAACAAGCGATACTTACACCCGACCAAGTTCGACCGAGCCCTAAGAGAGCATCTAACTAAGCTCTGGAACCAACCATGAATCTTGATACAATAC  
GACTTCAGGACGCTCATACAAGAACTTTTTTCGCATCGGAAGCACAATCGCGCCATTACGATGTGTTCATGCCAAGCGAAGAAGCTCGTACTAAATCAGG  
TATGGGAAGCATACGCCAAATCTTGAAAAGATACGTCATGCTACAACATTGCCAATGCACATACGCTTGCAATTGAAACAGCAGAAGAAAGAGCAAT  
TGACCAAATGGTTGAACACACGTCACATCAGATCCACTAGTGGCATGCAACACCAATCACCGAGATCCAATCGGGAAAAGGATCGACTCTCAAGGA  
ACGAGCGTCCCAAGAGAGTTCTGCAACATTGAAAGTGCTCAAGCATCAACATTAGTCTTTTCGCACCAACATTACCGTCAACGGACACAAATTTCAA  
GCCATGATCGATTCTAGAGCAAGCGGGAACCTTGCCTTCTGATCATTCGTGAAGCGATATGTGATAGCTACCCAGTCGAAGGACGTCGGGTACGAAT  
TGACCGCGGAACCAGGCCTTGTTCAATTCCTTGCCAGAGAAGATGACATAAGGTGGTACAGACCAGCCTTTGGCATTAAACACAGGCAATAACAGTTT  
GCCATTGTGTTGAATCAGAAACCAAGGCTTTAGGTGCTTGCCTACGCTCTGTGCCAGTGACAACCATAGTATTCTGACAGTGTCCAAGCCTGAATCC  
ACTC

> Cb\_clean\_k141\_27828

GGGCGGAGGAATGGCCGGTTTTATCCCAGACCAGGGAGGGCCCTTGAAACGGCAGCCAGCTAAGAGTTCGGCAAGAGGGGCGGGTTATCGAGATC  
GACGACTGACTCTACCAGGGAGCCCTGGAACGCAAGTAAGACTCCGAGGGCGGAGGAATGGCCGGTTTTATCCCAGACCAGAGAAGAAACCGCA  
GATACTATTCTAGACCAACAACCAAGTCCAATAAGCCTTGCTATGGACCTCAACTTATGAAGCTCAACGTAACCTCAGAAGGGTCGCAAGATCAAAGG  
AAAGCCCAAGAAGAAACAAGGTAGCGATAAGACTTGTTACGATTGTGGCAAACCAGGCCACTTCGCGAGAGATTGCCGTTTCAAGAAGATGGTGC  
AGCGGCAGCCTTTCAACACGATGCAAAGGATAGAAGAAGGTCGAGGGGCTATCACGACAATAGATCGCCCCAGCAAATCCGACTCCTAGGCATGA  
TGACCCAAAAGCGCAAACGGGAAGAACTATCGAGGAAGCCCGTCAAGTCAAGGAAGATAAAAGACTCCAAGCCCTTCTCGGCAAGGACAAGAA  
TGCGCCAACCTCCGAAAGGAAGAAGGAGCAACACGAGCCAAGGACATTTCGGAATGATGCAGCGACGAAATATCCCGAACCAAGTCCTCTGGGAAC  
AGCGTAACGAACATGGAAGCCTTCACTGGCGATTCTGTTACGACGATACATGCCAAACACACGTATCTTCCAAGAGGGAGAACAATTCTATCCGGT  
GGGACCATTGTGGGAAGAAAATCCTCCAATCCGGCGATATGATGACGGAAGTAGGCCATTGCCTGTTCCAGAGGAGCTACAAGATCTAGCGCCACA

CCTCAGACTCGCTGCTAACGAATCTTGTTGCGAAACCCCAGAGAATATCCCACCTGAAAAGGAGGAAGAACAAGACTCGTCTGCAGAAGAAGACA  
CGACGGCCGAGCCATCTGACGAAGAAGCAGACCAAGATGACGAGATCACAACATCCACATGTACCTAAACATGGATCATGCGAGAACTTGAGCTAT  
TTCTGGCTATACGACAAGAGCAAATATTCCCAAGGATCGGAAACAAGCGATACTTACACCCGACCAAGTTTCGACCGAGCCCTAAGAGAGCATCTAA  
CTAAGCTCTGGAACCAACCATGAATCTTGATACAATACGACTTCAGGACGCTCATACAAGAACTTTTTTCGCATCGGAAGCACAATCGCGCCATTACG  
ATGTGTCATGCCAAGCGAAGAAGCTCGTACTAAATCAGGTATGGGAAAGCATAACGCCAAATCTTGAAAAGATACGTCATGCTACAACATTGCCAATGC  
ACATACGCTTGCAATTGAAACAGCAGAAGAAAGAGCAATTGACCAAATGGTTGAACACACGTCACATCAGATCCACTAGTGGCATGCAACACCAATC  
ACCGAGATCCAATCGGGAAAAGGATCGACTCTCAAGGAACGAGCGTCCCAAGAGAGTTCTGCAACATTGAAAGTGCTCAAGCATCAACATTAGTCT  
TTCGCACCAACATTACCGTCAACGGACACAAATTTCAAGCCATGATCGATTCTAGAGCAAGCGGGAACCTTTGCCTTCTGATCATTCTGTGAAGCGATAT  
GTGATAGCTACCCAGTCGAAGGACGTCGGGTACGAATTGACCGCGGAACCAGGCCTTGTTTCCTTGCCAGAGAAGATGACATAAGGTGGTAC  
AGACCAGCCTTTGGCATTAAACACAGGCAATAACAGTTTGCCATTGTGTTGAATCAGAAACCAAGGCTTTAGGTCGTTGCCTACGCTCTGTGCCAGTG  
ACAACCATAGTATTCTGACAGTGTCCAAGCCTGAATCCACTCTCATCAAAGTTGTATATGTCGTGCTCTGTGATTCCATAGAAGGCTATTATGTTTTGA  
ACCAGTGTAACCACTCTGTAATAACCTCTGGGTCCTCATTC

> Cb\_clean\_k141\_41134

AGCGATAAGACTTGTTACGATTGTGGCAAACCAGGCCACTTCGCGAGAGATTGCCGTTTCGAAGAAGATGGTGCAGCGGCAGCCTTTCAACACGATG  
CAAAGGATAGAAGAAGGTCGAGGGGCCTATCACGACAATAGATCGCCCCAGCAAATCCGACTCCTAGGCATGATGACCCAAAAGCGCAAACGGGA  
AGAAACTATCGAGGAAGCCCGTCAAGTCAAGGAAGATAAAAGACTCCAAGCCCTTCTCGGCAAGGACAAGAATGCGCCAACCTCCGAAAGGAAG  
AAGGAGCAACACGAGCCAAGGACATTCGGAATGATGCAGCGACGAAATATCCCGAACCAAGTCCTCTGGGAACAGCGTAACGAACATGGAAGCCT  
TCACTGGCGATTCTGTTACGACGATACATGCCAAACACACGTATCTTCCAAGAGGGAGAACAAATTCTATCCGGTGGGACCATTGTGGGAAGAAAAT  
CCTCCAATCCGGCGATATGATGACGGAAGTAGGCCATTGCCTGTTCCAGAGGAGCTACAAGATCTAGCGCCACACCTCAGACTCGCTGCTAACGAAT  
CTTGTTGCGAAACCCCAGAGAATATCCCACCTGAAAAGGAGGAAGAACAAGACTCGTCTGCAGAAGAAGACACGACGGCCGAGCCATCTGACGA  
AGAAGCAGACCAAGATGACGAGATCACAACATCCACATGTACCTAAACATGGATCATGCGAGAACTTGAGCTATTTCTGGCTATACGACAAGAGCA  
AATATTCCCAAGGATCGGAAACAAGCGATACTTACACCCGACCAAGTTTCGACCGAGCCCTAAGAGAGCATCTAACTAAGCTCTGGAACCAACCATG  
AATCTTGATACAATACGACTTCAGGACGCTCATACAAGAACTTTTTTCGCATCGGAAGCACAATCGCGCCATTACGATGTGTCATGCCAAGCGAAGAA  
CTCGTACTAAATCAGGTATGGGAAAGCATAACGCCAAATCTTGAAAAGATACGTCATGCTACAACATTGCCAATGCACATACGCTTGCAATTGAAACAGC  
AGAAGAAAGAGCAATTGACCAAATGGTTGAACACACGTCACATCAGATCCACTAGTGGCATGCAACACCAATCACCGAGATCCAATCGGGAAAAG



GATCGACTCTCAAGGAACGAGCGTCCCAAGAGAGTTCTGCAACATTGAAAGTGCTCAAGCATCAACATTAGTCTTTCGCACCAA

> Cb\_clean\_k141\_45057

TGCTTGCAAAGTAACCACTTTCCTGGCCTCCTGCACGGCTTCTTGGCCAGCCTGGGCGGCTCTGTACTTGCTGATGGAGTGCTTCTTGGCTTGCTT  
CAGAATTCGCTGGCCCTGCGGTCGTTTGAGTGCGCTTTTAACGTTGTTACAGAAAGATGCGCCTGCTCGGCGCCTACGGCCAACCTCGCCACCGAAT  
AAAGTACTCGTGTTGCGTTTCCAGCACCTCTTGGCCTCCCACTCGCCTTCCCCATCTGAGAGCGGCAAGCTGTCCGCCTGCGTCTTGTGCGCCGCGC  
CACGGCTCAAGAAGAGATATGTGGAAGATGTTGTGGATACGCGAATCAGACGGCAGTGCTAGGCGGTACGCCTGCTTTTCGACTGCGCCAATTACCT  
TGAAAGCTCCAGCGAGCTTACCTGCAAGCTTCTTTGATGGCACCTTGAA

> Cb\_clean\_k141\_21308

GGGCAGGCAGTCTATAGAAGATAATCTACAAAAGTTAGCATTATGAAGTAGCAGTCGACCAGGAGCACTCGCCCTCCAGATGACGCTACCGCTTATT  
GTGTCCAATTGTTCCGGCAGGTCAGGGTTCTCTAAAACCTCCATGCGACCCTGATTCCGGTTGTCCCGGCGGTTCCGGAGTTTACCAGACTCTATGCGAT  
CCCGAGAAGTGGTCACCCACCTTGAGCCGCTGCCCAAGGTCCTGATATCTTCCATTTCAACCGCCTTGCTCTTGCCCGCGATTTTGCCGCTACTGG  
TATCGAGATGGTTCCTTGCTCCGCTCGCAGGAACGCACGCCCGAAGGCTGGCGAGCCTGGACCTCGATGCATCGTTGGTCCCCGCTCCGGGCGATG  
CTCGGAGTATGTTTGGAAGGATTACTCGAAGTGTGATGCGAAGATGTCCAAGCCGGAGTGGGCGAGGCTTCGCGAGATCCGTGACCGGATAGAGGG  
GGAGTTGGGTGAGGTGGTTGGAAAGGAGATCGCCTTGCTCCACGAGCTAGCGAAACACCGTTCTAAGAAGCTGCGCCTGCAGAAGCAGCTGAAAT  
TTGCGCAAGGGCGGCAAACCGAAGAGATGGCTAAAGAGATAGACGCTCTTGACGAAGTCGACGAGTTGGAGCGTGAGATCTTCGGTGTCATGGAA  
GAGGAGCAGGATGTCGCAGCCCCTAGCATTCCTTTCTCGCTGGACAAGGAATTGGAATGTTCCCTGATTGCTGGAATCTTGTTGATCCTGGAGAGT  
GGTGGATTCTTTGTGAGATTCCTGGTGGAACCGCTGCATAGGCTGGTGGCAGTTCGCAAGGCGGTGCTTATCCGAGCCACTTCTTTGGTGCCCTGAG  
CCACTTGGCGAAGGCATGTGCAATGGAGAGATCTGGCCTTAGAGCGCAGAACTCGTCTTATCCTGCTCGCTTGCTTGCTTGCGATTCTTCGATCACT  
TCGTTTCCTGGTCTGTGGAATTCCATGAGTTTCTAGTAGCAATGGGACCGATGTTTCGGATGGTTCCCAGGTGTTGTTCGGACTCTGGGTACCCTTTTTTC  
ACTTGATAAAGTATTCGTTGCCATCCCATGCTTCGATTCTTTGCACTTCGTACTCATCTTCTTCCCTCAGATTGGAAGTGGAATAACTCCTGACACGGGG  
TGTCGGCGTCGGCGGGTTCCAGTAGTGATACATGGAACACTGGGTGGATCTTTGCGTCCTTTGGTAGCTTCAGTCGGTAGTCAACTGGTCTTCTGGC  
TTCGTCAATCAAACTGGTCCGACCCGAGCACTTTCTCCCTGCCCGCCAGCGCTCGCCGGTCCATCTCATCCGCGGCCTCGTACTTGCCTTGGTGTT  
GCGGCACGAGCGCCAGATTGCTCACGCTCGCCAGCGTGGAGGGATTCTCCACCCCAAGCACTTTCTTCCAGCCCTCCGTGGCTCGCAGGTTTCATCT  
CCTCCGCCACCTCGTACATGCCTTGCTCTGTTGGATACCCGCCAATTGGTCCATCCTAGGCTCTCAACAATGTTTCGACATGTCCCACACGATGAGTCA

TTCAAGAGAATGGAATGATGGTCCGCTCGAATCAAGCACATGTCCATGCCCCAGGGTGTGATTTTGGGGTTTGAAACACGCAAGAAAACGCGTTC  
ACTGCGGATACCTCTACTTCCGG

> Cb\_clean\_k141\_31340

CGGTTGTCTTAGCTAACGCTTATTATTATATCCAATTGTCCCGGCAGGTCAGAGTTCTCTAGTTCTATGCGACTCTTTTTCCAGCTCTTCCGGCGGGTTCG  
AAGTTTACCAGACTCTATGCGACTTTCATAAGCCGTCTACCCACCTTGAGCCGCTGCCCAAGGTCCTGATATCTTCCCATTTC AACCGCCTTGCTCTT  
GCCCCGCGATTTTGCCGCTACTGGTATCGAGATGGTTCCTTGCTCCGCTCGCAGGAACGCACGCCCCGAAGGCTGGCGAGCCTGGACCTCGATGCATCG  
TTGGTCCCCGCTCCGGGCGATGCTCGGAGTATGTTTGGAAGGATTACTCGAAGTGTGATGCGAAGATGTCCAAGCCGGAGTGGGCGAGGCTTCGCG  
AGATCCGTGACCGGATAGAGGGGGAGTTGGGTGAGGTGGTTGGAAAGGAGATCGCCTTGCTCCACGAGCTAGCGAAACACCGTTCTAAGAAGCTG  
CGCCTGCAGAAGCAGCTGAAATTTGCGCAAGGGCGGCAAACCGAAGAGATGGCTAAAGAGATAGACGCTCTTGACGAAGTCGACGAGTTGGAGC  
GTGAGATCTTCGGTGTGATGGAAGAGGAGCAGGATGTGCGAGCCCCCTAGCATTCTTTCTCGCTGGACAAGGAATTGGAATGTTCCCTGATTGCTG  
GAATCTTGTTGATCCTGGAGAGTGGTGGATTCTTTGTGAGATTCTTGTTGGAACCGCTGCATAGGCTGGTGGCAGTTCGCAAGGCGGTGCTTATCCG  
AGCCACTTCTTTGGTGCCCTGAGCCACTTGCGAAGGCATGTGCAATGGAGAGATCTGGCCTTAGAGCGCAGAACTCGTCTTATCCTGCTCGCTTGC  
TTGCTTGCGATTCTTCGATCACTTCGTTTCCTGGTCTGTGGAATTCATGAGTTTCTAGTAGCAATGGGACCGATGTTTCGGATGGTTCCCAGGTGTT  
GTCGGAATCTGGGTACCTTTTTCACTTGATAAAGTATTCGTTGCCATCCCATGCTTCGATTCTTTTCGACTTCGTACTCATCTTCTTCCTCAGATTGGA  
AGTGGAATAACTCCTGACACGGGGTGTGCGCGTCGGCGGGTTCAGTAGTGATACATGGAACACTGGGTGGATCTTTGCGTCCTTTGGTAGCTTCAG  
TCGGTAGTCAACTGGTCTTCTGGCTTCGTCAATCAAACTGGTCCGACTTTGACGCGATCCAATCTCTTTGTCTTTCTTCTC

> Cb\_clean\_k141\_14865

GACCTGCTCCTTTCTCTCAGCAACACCAAAGAAGAGGACTGACTTCACTCTCTTGCGAAACACAGCAAGCATACCACATTGGTGTGTTATTGGATG  
CAAAAGGCAAATGTGACAAAGAAGATAGCAAATTGTGACTGTCCTGCATCTTTGCAGTTCCCAGGTGCAGCTTCTCTTCCTATGTCGAAAACCTGTTA  
GAATGCAGCATCTCGACTTCAGTCTTAAGTTCTCAAAATTACTACCTGGTGGCAATTTCAACATGAACATCTACATGACTGCTTATGGTAATCCAATC  
CAATTGGAGATATACCTCAAGAGGTAGCTTCTGTGCTTGGGGTTGCGGGGTCATCAGACAACCTATGTGTTGAGTGATGAAGATGTGAGGACTTACAG  
CCAAGCATTAGTCTCACAGCCTCTTAGATGATTTTCTTTCTAACTGGAGTTCAAAGCACAAAGCCTAAATCTAAAATCAAAAACCATGGGATTAGT

> Cb\_clean\_k141\_25120

CCCTACAAATAATCAAGCTGGACCAACTAATTTACAAGAGCAGTTATTCGACGAGACGACTCAACCTCACACTAGAACAGAATCAGGAAGTTCTA  
CAGAATCCTTTAAATCAGCCTCCTCTATTGCAAGTAAAAGATCTTCAAAAGGGAGATTTCCAGTTAAAATGTCTGAGCAAACAGCACAGGGACAGA  
AGTCAAAGGCTGGTGAGACAGGTGGCCGTCAAAGCCCCATTTCTGAGCCTGTTGGATCTATTTTAGGAATTGAGGGAACACGAGTCGAAGGCGCAG  
CTATTCTTGTGTCAGAGAAGGTAAGAGTAAGGATGGCAAGTCATTTGTTTTGATGTTTGGAAATGACGTTGTTAAAGGCATGGATGTCAAGAAGCTCGA  
GACTGCTCTTGCAAAAGCGAAAAGTTGATCCAACGTATGATATGACAGGATTCATCAGAGCCATTGAATACCAAGGATTTGATCGTGAATTCTATATAC  
AGCATGCTTTGTCAAAGATGTCTGTCTCAGTCTTTTGCAGGTTTGCATCATCGGAGCAATCCGCGGGTCAAAGTTTGAGAAAATTTCTCAGGGGCA  
GCCCAGTTCCCGCTCGGCGCGCGAACTTCAGACGT

> Cb\_clean\_k141\_47347

GTTGGATCCATTCTAGGGATTGAAGGAACACGAGTCGAAGGCGCAGCTATTCTTGTGTCAGAGAAGGTAAGAGTAAGGATGGCAAATCCTTTTCGTTTC  
GATGTTTGGAAACGACGTTGTGAAAGGCATGGATGTCAAGAAGCTTGAGACTGCTCTTGCAAAAGGCAAAAGTTGATCCGACGTATGACATGACAGGA  
TTCATAAGAGCCATTGAATACCAAGGATTTGATCGCGAGTTCTATATACAGCATGCTTTGTCAAAGATGTCTGTCTCTGTCTTTTGCAGGTTTGCATG  
ATTGGTGCGATCCGAGGGTCAAAGTTTGAGAAAATTTCTCAAACCTTGTGAGGGAATGCCTAGTGATTTGGTGAGTGCCTTCCAAACCTGCTCTTTTC  
TTTCGACAACACCAAAGAAGAGAAGTACTGACTTCACTCTGTTGAGAAACACAGCAAGTATACCGCATTGGTGTTGTTACTGGATGCAAAAGGCAAATG  
TGACAAAGAAGATTGCGAATTGTGAATGTCCTGCATCTTTGCAGTTCCCAGGTGCAGCTTCTCTTCCTATGTCGAAAAGTGCAGAAATGCAGCATCT  
CGACTTCAGTCTTAAGTTCTCAAAATTACTATCTGGTGGCAATTTCAACATGAACATCTACATGACTGCTTATGGTAATCCAATTCCAATTGGAGATAT  
ACCTCAAGAGGTAGCTTCTGTGCTTGGGGTTGCTGGGTCATCAGACAACTACGTGTTGAGTGATGAAGATGTGAGGACTTACAGCCAAGCATTGGT  
CTCACAGCCTCTTAGATGATTTTCTTTCTAAATGGAGTTCAAACACAAAGCCTAAATCTTAAATCCACAAAAACATGG

> Cb\_clean\_k141\_13474

AGCACCCACAAAAAGTAAAAGTGGACCAACTAACATCTCAAGAGAAGCTATTTGACGAATCGAGTCAACTTGCACCACACACAAGAACAAGCTCA  
TCTGATTCAACAGAATCATATAAGTCCGCCTCTTCTATAACAAGCAAAAGATCATCAAAAGGTAGATTTCCCATCAAGATGTCTGGAAATAATGCTCA  
GGATCAGAAGGCCAAGCATGGCGAGACTTCTGAGAAACAAGTCCCCAGCTCCGCACCAACTGGTAGTGTTCTGGGCTTTGGCGGTGACAGAATCA  
CCGGTGAACCTCCGCTGGTCAGAAATGTAAAGGACAAGGAAGGTAAAGCCACCAAGCGCGATTTTGGAAATGAAGTTATTAAGGGGCTTGACGCTA  
AAAAGCTTGAGACTACTCTGGCTACTGCTAAGACTGATGCCACCTATGATATGACTGGTTTCATTAGGGCCATTGAGTACCAGGGATTTGATCGTGAA  
TTCTACATAAAACATGCATTGACTAAAATGAGTGTCTCTCAATTTTGTGATTTGCCATCATCGGCGCAGTCCGTGGATCTAAATTTGAGAAAATTGCC

AACACTTGTGATGGCATGCCAGCAGACCTCGTTAATGCCTTTCAAATCTGTGGATTTCTTTCAGGAACCCCAAAGAAGAAAACCTGATTTCACTCTTT  
TGAGGAATACTGCAAGCATCCCTCATTGGTGCGTTTACTGGATGGACAAAGCGAAAATCTCAAAGAAGATTACGAACACCACCTGCCCAGCTGCAC  
TTCAGTTTCCAGGAGCAGCTTCTCTTCCTATGTCACGAGAGATTCCGATTGCTCACCTTGATTTACAGCTTAAAATTCTCAAAGCTTTTGCCAGGTGGC  
AACTTCAACATGAACATTTACATGACAGCTTATGGAAATCCGATACCAATTTCTGACATACCTGTGGAAGTTGCTGAAATCTTAAAGATACAGGCTGA  
GTCCGATAATTATAGGTTATCCGATGAAGAGATTACAGACTTATAGTCAGTCACTTGTTTCAGATGCCTAGAAGGTAATCCACCTCCCACAATGAAATTCG  
TGTCTATAGGAGAATGGAGTTTGGATTCCATGTTCAAATGGAGTTTTATGGTTTTGTTTCTGGTT

> Cb\_clean\_k141\_12481

TAACGTTATGCCCAAGATTAACAATGATGGATACATAAAGATGATGAACTATCTTTTGAAGTACAAACCAAAGTGTGCTTCTGAGGAATTTGCCTTTC  
AACTGATAATCAGGACATTTGACATGAATGAGCTAGTGGTGGTGGCCAACCCATTCAAGCTTCCTTTCATAGAAGTTGGAATGCAAATAACAGATTCC  
AACCCTTGTCAAATGTTTCACCTTATTAGAGAATGAATATCGAGCACTTTGGTTTGACCAATTAAAGCACCTTCACATCCCAGCATTTCATGATGAATT  
TTCAGAGTTTTCCACAAATGATTTCTCAAAGAGAAGATCAGAATCACAAAGC

> Cb\_clean\_k141\_67601

ATCTCCCGAGCACTGCTATGTTACTGGGCTTCTGTGGAACAAAATAACAGGCGATGGCTGCTCGGACCTGGGGACTCGAGCCTATTCGACGATATGC  
TGTTGATGGCCTGTGTGATGACCCATGCCAGGCATCGAGGCTGGATAGATGTCGCCGCCGAGAAGCCCGAATGCTGAATTCAGCTCACGGGTGGTA  
AATATACCCTCACTACGTCTACAACAAACCAAACAACCAACTTCAACCTAGCAGAACTCTCACAGAATGTCTCCAAACATGATTGCACCATTGCTAA  
AGAAGCAGATGATCGAGTCCCAAACCCCAATGGTAAGTGTTATCTGAGATTAATATGTGTTTTGCCATCCTTTCTGCCTGTGACCCAGCTCTCCTT  
GAAGAAGTCATTGTCCACATGACGTTGTCCTTGAGATCCAATCCCAAAGGACTGGATGTTCTTCATTCCCTTTGGAATGCAGAGAAGATTTTGCTGG  
ACGAGAAAGATAGTGCAATTGGAATTGAGGATCATGAGTTGAATCTCACAACTGATAGCCCGGTTCCGCTATGGTTCATTGAATCAATAATGTCGGCT  
CCATTTAGATTTGGGTTTGAAGATAGAGGCGGAGTGATGCATGTAACATACTATCTAAAAGATACCACAGATTGCCAAGATTCAGGTTTCAGAGATTGA  
AACAGAACTCGGGTTTGCTTCTAGATTTATATTGCAAATGATGTGTAATCAGGGTAGACACATAGGGGCGACTATTGATCTTGATGACATATTTGCGA  
GATGCAGGAAGAGATTGCCCAGGGTGATTTGAACCGAGTGAGTCTTATTTCTGTGAGACACCAACTAATATGCCACCCACTCCAAGCTTCCCAATA  
GAACACAACATCCCACTGGTCTTTATGATCCAGATCCAATTAAGCGTGAGACTCAATCCCGGCTGGAGGATGTGTTCAACAGAATGGAGGGCGGG  
AGGTCAACAACTCCAGATAAACAACTGAAAGTAAAGACCATAACAAGAACTTCTAGAGAGAATGATGAGAATGGAAGAGAAGATGAATTCGT  
CCTGTCTATAAATAAGGAACAAACAGTGACCCCTGATGATTCAAGTAGTAACATTGGGAGGTATGAGAAGAAGTTCATGAAGCCTGGAACAGTTGTT

GGAAGTCAACATGTTTACAACCACACCCGTGGTGGAAACAATGTTGGCAATAAAGGAAGAAAACCTTCCCCTAGACATAACAAAAGATGTTGCAGTT  
GGGTTTGTCAAAACAAAAGATATGCGAGTTAAGGAGATTAAACAACCTGACAAAATTGCTCCAATAAATGGTCTAGCAAATCCATTCAAAAGCTCA  
AGATTAAACATGCTCATGCATTTCCATACAGCTGTTTACAATGTTATGCCCAAGACTAACAATGATGGATACATAAAGATGATGAACTATCTTCTGAAA  
TACAAACCAAAGTGTGCTTCTGAAGAATTTGCCTTTCAGCTGATAATAAGGACATTTGACATGAATGAGCTAGTGGTGGTGGCCAACCCATTTAAGC  
TTCCTTTCATAGAAGTTGGAATGCAAATAACAGACTCAACCCTTGTTAAATGTTTCACTTTGCTAGAGAATGAATATCGAGCACTTTGGTTTGACCAA  
TTAAAACACCTTCACATCCCAGCATTTTCATGATGAATTCTCTGAGTTTTCTACAAATGATTTCTCAAAGAGAAGATCAGAATCACAAAGCCAATCAAG  
TTCAAAGAGCTCAAAGCAGAATGGATATTATAGTAAGACACGTGGCGGTAGAAGTGTCATGTCCATATACAGGTGATTCTGATGGTTAAATGTAAATA  
AAATTTG

> Cb\_clean\_k141\_23000

TCCAAAAGTGTGAAGTAAATGGGGTCAATGGTCTCAAACCTGAAATTAAGGCTTTCGAATTCGTTTCAGATTTAAACGGCTCAATGATATGCAGAAATT  
CAAGATTGTAACGAATCACAACAGTAAAACAGGTGAGATTGAAGTTTACTTAGAAGAAGATGGTGTGCAAGCTTTGTCATAGCAATGG  
CAACTACTATCCTGTTGAGATACCACCAGGATACAACTCAGTAAACCTGTCCAATATCTTGGTGTGGATCTCTCCAAGCTTCTTCAAAACAAGTCAT  
GGTTTTACAATTTCAAATTGCCAATGATGTCTGAGGCAGAAAGATTAAGCTTTTTGACGGATAGTGTGATTATTCTGAGATTTTATCACAAACAACG  
AAATCAATACAGCGAA

> Cb\_clean\_k141\_67281

AACCACCTATTCTGAGTTCCTCCAGAGGTCTGTCAATAAAGCAAGAGATTCAAAAATTGACACCAAATCCATGCTCAAGATAATATTCCCTCAATGGA  
AATCCTTTGATGTAATAGCATCATTTGTTGGCAAGTTCGGTGCTGTCAAAAGTTCAAACAAACACTATTCACAAGCAGTCAGAACTTGGACTGTAA  
CAACTTCAACTATGAATTCAACTCAAGTTTAAAGTCAATACTTGAAACAAGTTTCGGAACCTTCTCAAGAAGCTACAGAAGAAGATGTAGCAGAGTTT  
AAGAGAATGATGTCTCTAAAGCTTGAAAATCTTGATCAATTCAGTACGAGTGTAGGAGAAAAGGACTCAGACCACTCGATGTTTTTTTACTACATGA  
CAAAAATATATAAATCTTCAAGAACATCAAAGGTTTCAGACTTTTGCAAATGGTCCATCCACTAGCGGTTTGCACATGACTGCATTGGCAATCAAGCGC  
TACAATCACATTCCCGGTGCATCAGTTCATATGGATGTTGGAATGGATGAGAGTGACCTTCACTCAGAGTCATCCTTGAGCATAAAGCTAGACAAGAT  
AAAGTTATTATACAATATAATAATAATGAAAAAGAATGAAATGATCACTGGCAAGTTGACTGATTTTCGACATGGTCTCACAAAATGGTTTCATTGTCTGG  
ATGAATGTAGAACAAATTGTGAGATCAATTAGATCATTGGCTGGATTTGACAACGTCACACAAAAAACAATAAAATTGTGTGCCTGCGAGCTTCTTCC  
GATGTCAGAAATTGAAAGAAAAGCTTGTCTCATGGAGAAGCATTAACTACAATTTCATAAGAAAACAACAAAAGAGAATCACCAAGTCAGGCTCTGT

TATTTGGTCTGGTGACATGTCTGTTCTTGTGAACTCAGAAGATGAATGCTTTACAATGAATGAAACAAATAACATAAGATATATATCATCTAGAGAGAT  
CAAAGATCTTTCCTCTCTATATAGATCAATGAGGCAGATGTGTAAATCATTAGACATGGAGTTCCAGACTTTCTTTTCAGATGTCTGTCATGTCAGTGGG  
TGATGTTTATTTGTCAACAACTCGAAGTCCCTCCAAAAATGTGAAATAAATGGGGTCACTGGTCTTAACTAAAATTAAGGCTCTCCAATTCGTTCA  
GATTTAAACGGCTCAATGATATGCAGAAGTTCAAGATTATAACAAATCACAATAGTAAACAGGTGAGATTGAAGTTTACTTGCAGGAAGACGGTAT  
CAGAACTGCAACGCTTTGTTCATAGCAACGGCAACTACTATCCTGTTGAGATACCACCAGGATATAAACTCAATGCACCTGTCAAGTATCTTGGTGTGG  
ATCTCTCTAACTTCTTCAAAACAAGTCATGGTTTTATAATTTAAATTACCAATGATGTCTGAAACAGAAAGATTGAGCTTTTTTGGCAGATAGTGTG  
ATTATCCTGAGATTTTATCACAAACGACCAAGTCAATACAGCGAATCAATGATTATCTTGAGGTTTCGAGAAGAAGTGAATGAGGAAGCATTTAGCATT  
ATCAGAGATGCCAGGAACATCAATGGGATTCAACATATCAAGTGAAATTCAGGACGGAATGTCGATCAATGACTTGTTTAGACAAACAATGGACA  
CAACTGAAATGCCAACTCAGCTAACAGAATTTAATGAGGATCTTGGTGATTGGGCTGACCATGTCAATGATCAAATGGAAAACGACCTTAGGTTGCT  
AACAGAAGATCTTGAGAATGATGAGAATCTTGAGCTAACTAGAGCACTCGGATTCAAACGACCAGCGCCCAAGAGAGTTATGGCAACAATATCTGG  
ATTACAGCAAGGATCAATCCTGAAATCAAGAATCCTGGATTGTTTTTTTTCAGTCACAAAATATACGAAACGAGAAATCACATCAATTGCCACACCAAT  
ATGTCTGGTTGATGGGTGTGAAGATGGACCATCAGAAATTAGGTGAGCACTTGAGAGAAGAGCTTAAGGATCATATATTATCAGCCCTTGTTATGACA  
AGTGGTGCGACTAAGAGGATCTTAAGACAGAAGATTGAGAATAGCAACACATATGGAATACCAATTCAAATGCTTTACAACATCCTCAACTCAACTA  
CAATAACTACAACAAATATATTCGATGAAATACTAGAAGAGCAAAATGAAGACTATGCCTCTGACAGTGGTGATAGTGATGTGTGATCAAACCTCGC  
ATCATGCAATCATAATGGACTTAATGGTTGAAATTTGATCTCTAATTCTTTTTCTGGTCGTGGGGGGGAC

> Cb\_clean\_k141\_54286

CAGTGATATTCATGAATACGAGGTTGAATTTCTTGATTCATTTACATAAGCCCCTTCAAGAGATGTTATCAGTTGATAACACTTATCCGAGTCCTGATG  
CTTTTGAGAACTCTCAAACCTCATGTCTAGGCAGAGGGGCAAGGAGAGAAATCCACACAATGAGCTACTTTACCAAGTTATAAAGACAACATTGA  
AGGGTCACAAAGTGAGGGCGAACCCTTTCAACTTGCCAATGCTGGAGGTTGGAATGTATTTGAATGACAAGTTAATCTATATGAGTTTCATGCAGTT  
GTATCAAGAGTTTCAAATTGAATGGTTTAAATCTATGAAAGATATTGATCCACCAAAATTCACAATCAGTTTAAGGATTTCAAATCCTTATCAAAT  
ATCCTCACGAACCCCTCACCATCAAAGTCGTCCATCTAGAAGAAAAGCAGGATCTGTCATTTGAGCTTTGGGTTTTAAACTTATACAAGTTGACTT  
CAGTCACGGAACATACAAAACAATATTGACATTGTTTGTCTGGCGTAATGGAATTGGACTGTGTTGAAAAGGTTTG

> Cb\_clean\_k141\_12535

AGTTTTGATGCCAAAGGATTCATTGACAATATTAATATCAGGGATTCAATCGGGAAGACTACATACGAGTGTCTCTCATGAAAATAACACCCACCA

GATGCTGAGGCTCGCTCTCATGGGAGCAATTCGTGGTGCAAACCTTTGACAAAATCATCAAAGTGCTGCTGGCATCGAAGAAGATTTGCTGAACCT  
GGCAAAGAGCAACACAATCGTCAGATCTGCTCGCCGCTCTGATGATATAACTATATTGAGATGCACAGCTGCAATTCCTCAATGGGCCTCATACTTCA  
TGGGCAGAGCGAGTGTTGCTAAGAAGTTGCCGAACCTTGGCATGCCCTGCCGTTCTGCAGTTCCTGCTGCGGCGTCGTTGCCAATGTCTGCAGA

> Cb\_clean\_k141\_33118

CCATTGCCTTCTCCAAAGTCATTAAGGGAACCTTTAATGAGAATATTTACATGGCAATGTTCAACAATCAGTTGCCCTTGAGTGAGATACCAGACGAG  
TTGAAACTGGTTCTCAATGTCAAAACCGAATCCGATTCAATGGCTGTTGACGTTGCAGGCATTATTACGAGCATGATGTCCCAGGCTCAGGGCGGTG  
GTGTTAGAGTTTGAAACTTATACAATTCGAATCAGTTACGAGAACATTGAAAGAAACTCATTGAAAAAATCATGAAGATGTGCCAGATCATCTCGG  
CGTAAACTAGGAGTATTTGACATGTGATTTTGGAAGGGGA

> Cb\_clean\_k141\_39151

ACAGAACAAACGGCCAAATAACTCACACATTTTTGAGAGCAGACGTGAATGAGATTATGTCATACAAAAGATGGACGAAAGGGCTACTAGACCTCCG  
GTACTCTGGAAAATCATCTTTTGAGTTGTGTACCCTGTATAGATCTTACTGGGCAGTCGACCTGAAGGGAGTGACAAATGAGCAACCACTGGACTAC  
ACTCATTGGAAAGCCCCCGACAAGAAGCCAAGCTCGATATACTGGTCGTCTCACTCTGCGGATAACCTACTCGATACAAGAGGACCACTGACAGGA  
TATATAGGGACTGCCACCCGAGAGAAAAGGTCAGAGCACGGATACAAGATTGTGGACACCGGGGCCCCGTCTAGATCAGTTATGAAGCTTCAACTG  
ATCCGTAGCCAAGCATAACGGAAATCCGTCGTTCAACAACTTGTTGGACCGAATATCTCTCACTAGATCTCCAGTCCCTCTTCCACAATATCCGATGTA  
TTACCGAAAGTTGTGCGGAGGGTCAATCTCGCACCGATATGCATCATCAATCAGGTCCATGGGAGCCTCTTACGTGCGGCCCTTAAACTTTGCAACTCA  
CACCCGAGTCGACACAGACAACATCTCTAAACTGAGTGGTTCTGTTGTCAACTACCCTGTGATGCTTCAAGAATTTATCATCATGGCTCAAGCGGGA  
GCAAAGATGATGCACTTACACTTCCGGTCATCAGCAGGTGGATTATATCTTCCATTTGATTCACTGATACCTTTGGACGATGACTCGCTATCGTGTGAC  
CCCCCTGATTTTGAACCGAAGCTCTTACCTCGCAGTACCCTGTGCTATAGTCCCACCTTAGCACTGAAACGCACTCTAGAAACAGATTTGGGTAGCAT  
ACCGCGAGGGTCGTTGATCCCGCCTATGGACTATCAGAGCTTTCCGATAGTGTGGCTCAGTGTGCTGAATTTCTTCACATCAACTCTTCGAGATTCAA  
ACCGAGCGAAGACCATAGCCGACACGCGGGGTCATATTTCACTACCGTCCAGCTTCCAGATTGACATTGCCGAGGCACATGCCTTAGGAGCAATGA  
GGCTGGGAAGAGCAATCGCGCATGCTGTGACTCACATCGTGATTTCGAGACACATTCAGGACACTTCACCTTCATCCGGAGCGCTGGGATGAGAGTT  
TGTTCCCTCGATCATAACATACGAGTGTGCGTGAAGACGATCCTTGCCCTACTTAACCTACCCCATATTCCAGACACATAAAGATTATCTCAGTCTGCGGT  
ATTCTACCCTGAGATACGGAAGAGCACTGTCCGTTACTAACCGGATGATCGCGCTGATACGACGAGAGGTGAGGTTGATCTTCAGCAAAGCAGATCA  
CCCGTTCTGGACAGAGAGAACAGCCGTGTTCTCAGGAGAAGGGCCATCAGCATTAACCTGAGGCGTTGGTGATACATGCGGCAATTAGACTCAGGTG

GTTATATGCGATAGGTCATCCGAAGGCCTCCTTGTACTCACGCACATTTAACGGTTTCACTATAAGTCCGAGGGGAGTGACTTTGACCCCGCAGGAG  
AGTTTGAACCGCACCGCTTTACAGCTAACACGCCTCGCCAAGTTCTACCGAACGGACGGGGATGAGCTGTTGTCTGGATTTATGATGAAGTTGTCTG  
CTTTCCAAGGACTAGCGATATTCAACGACGACCAGCGAACTGTCATGAGATTTTCCCGGGCCATCTCACCGACGCTGTACTGCGTACGGAATGTCAA  
GCCGACCAGTGTGGTCAAACTCTTGAATCTGCCCCAACACACTGCTTGAAGTGTGTCCGCCCAGCTCGCACAAAGCATACTACTATGTGGTACGCG  
TACAAGACCAGGAAGCACGGTGGGGTAAGCTCAGCAGGGTACACATGGCTCCCCATCGTGTCTACATTAGAGATCCAGCCCACCTGCTTTGTCATTG  
GTAATGGAAACGGAGGGTTGGCAGATCTGCTCCTCACCAGTTATAACGTGGAAGTAGTAGGGCTTGATCTCGAGTCTGATATGCCTACCAATTCTGC  
AACACTCCTTAACTACTTTCTCTCGGAATTTTCGGTGAAAAATAAACTAGATTTCAGACAATCAGATGTGTCAATCAACACCACTGGAAATTGGCTA  
GAAAAGTCAGTAAGGACCCTTCTGATGACTGAAACCAATACTACATCAACTGTTATTGCGGACATCACAGGTCCCGCTGCTATCGACGTTCTCAGTT  
CCCACTGGATGCTATGGACACCAGGTCTGTGGTATCTGCATACTGCAGGCTGATAGGCTCGAGAGATGACATCTCTGGATGTATACGCTCTCTTCCT  
CGAGTCGTAACGTCTCGTCTGTGGGTAGTTTCACTCAACGTTTGAAATTGAGATAATCCTTGAAGTATCTCGTACAAACAGCAGCGCTCACCTGT  
GCACAGGTGCTGGTCCCCCTCATAGACTATCCTCTTGATCGCGCGCACCCACGAGTTGATCCCCCAGAGACGAGACGAACTGCTGGAAGCAGCTACTC  
GATCGGTCCACGCGTGGACTGATGAAACGTTCCCGAGCATGTATGAAATCACTCGATCACTATGCAAAAGTCTGCTCAATAAACCGAAGTCTACACA  
GTTAAGATACTGAGCGCTATGACCTGATGTTGGCGTACTGTGTGTTGACAGTGCGAGTTTCCCCCTCACCAAGTGGTGCAGTCGTGGATA  
CTAGACGAGAGAGCTGAGACAGATCTGTTTTACTACTATCTGAACGAGTCGACTATATCACATCTCATCAGATACTCTGCCAGACTGTTGACGTGGTC  
AGATACCTCAATGACCGTGTGAATCTCCTCTCCTCACTGGAACTTAGGCAAAGTCATCACTTACCCAAGTGCTTGATGCAACAGTTCCAACAGTTT  
TAAGTAAAACCGTGCTTAAAGCAAAGCTTAAATCTTCTTTCATCCGACCGAAACGCATTCCCCACCATTTTATTCATC

> Cb\_clean\_k141\_21666

GCGAAGACCATAGCCGACACGCGGGGTCATATTTCACTACCGTCCAGCTTCCAGATTGACATTGCCGAGGCACATGCCTTAGGAGCAATGAGGCTGG  
GAAGAGCAATCGCGCATGCTGTGACTCACATCGTGATTTCGAGACACATTCAGGACACTTCACCTTCATCCGGAGCGCTGGGATGAGAGTTTGTTCCT  
CGATCATAACATACGAGTGTGCGTGAAGACGATCCTTGCCTACTTAACTCACCCCATATTCCAGACACATAAAGATTATCTCAGTCTGCGGTATTCTAC  
CCTGAGATACGGAAGAGCACTGTCCGGTACTACCCGGATGATCGCGCTGATACGACGAGAGGTGAGGTTGATCTTCAGCAAAGCAGATCACCCGTT  
CTGGACAGAGAGAACAGCCGTGTTCTCAGGAGAAGGGCCATCAGCATTAAGTGGCGTTAGTGATACATGCGGCAATTAGACTCAGGTGGTTATAT  
GCGATAGGTCATCCGAAGGCCTCCTTGTACTCACGCACATTTAACGGTTTCACTATAAGTCCGAGGGGAGTGACTTTGACCCCGCAGGAGAGTTTGA  
ACCGCACCGCTTTACAGCTAACACGCCTCGCCAAGTTCTACCGAACGGACGGGGATGAGCTGTTGTCTGGATTTATGATGAAGTTGTCTCTTTCCA  
AGGACTAGCGATATTCAACGACGACCAGCGAACTGTCATGAGATTTTCCCGGGCCATCTCACCGACGCTGTACTGCGTACGGAATGTCAAGCCGACC



AGTGTGGTCAAACTCTTGAATCTGCCCCAACACACTGCTTGAAGTGTATCCGCCCAGCTCGCACAAAGCATACTACTATGTGGTCACGCTACAAGA  
CCAGGAAGCACGGTGGGGTAAGCTCAGCAGGGTACACATGGCTCCCCATCGTGTCTACATTAGAGATCCAGCCCACCTGCTTTGTCAATTGGTAATGG  
AAACGGAGGGTTGGCAGATCTGATCCTCACCAGTTATAACGTGGAAGTAGTAGGGCTTGATCTCGAGTCTGATATGCCTACCAATTCTGCAACACTC  
CTTAATACTTTTCTCTCGGAATTTTCGGTGAAAAATAAACTAGATTACAGACAATCAGATGTGTCAATCAACACCACTGGAAATTGGCTAGAAAAGT  
CAGTAAGAACCCTTCTGATGACTGAAACCAATACTACATCAACTGTTATTGTGGACATCACAGGTCCCGCTGCTATCGACGTTCTCAGTTCCACACTG  
GATGCTATGGACACCAGGTCTGTGGTATCTGCATACTGCAGGCTGATAGGCTCGAGAGATGACATCTCTGGATGTATACGCTCTCTTCCTCGAGTCGT  
AACGTCTCGTCTGTGGGTAGTTTCACAC

> Cb\_clean\_k141\_40192

GATAGCCTCTCGGACGTTGGCATCGCTGGAACACAAGTACCACGTCTCCGAGGCTCCAAATATAGCAACTCTCATCGACAACCCTTATGGCTTGCCT  
CTTGAAACGGCGGTCTCACCCCTGAGCAAGGTAGGGGCACTGACGTTGGATGCTTTTCGAGGAGTGGTAGACAACCGAGACATCGCCCCATTACTA  
CGAACCTCCGTCGACAAAGCTGAGTTGACGCTCAAGGAGGACTTACTGAAGATTGACCCCTTCAACCCCATTTCTCATACACGACCTATTTGAGGCAT  
CTGGGTTTCGGGTCGATAAACTTATGAAGAAGATGTTTCGTGCACACACGAACTATTCAGACGGTGGCTCAACAGAACAACGGCCAAATAACTCACA  
CATTTTTGAGAGCAGACGTGAATGAGATTATGTCATACAAAAGATGGACGAAAGGGCTACTAGACCTCCGGTACTCTGGAAAATCATCTTTTGAGTT  
GTGTACCCTGTATAGATCTTACTGGGCAGTCGACCTGAAGGGAGTGACAAATGAGCAACCACTGGACTACACTCATTGGAAAGCCCCGACAAGAA  
GCCAAGCTCGATACACTGGTCGTCTCACTCTGCGGATAACCTACTCGATACAAGAGGACCACTGACAGGATATATAGGGACTGCCACCCGAGAGAA  
AAGGTCAGAGCACGGATACAAGATTGTGGACACCGGGGGCCCCGTCTAGATCAGTTATGAAGCTTCAATTGATCCGTAGCCAAGCATACGGAAATCCG  
TCGTTCAACAACCTTGTGGACCGAATATCTCTCACTAGATCTCCAGTCCCTCTTTCCACAATATCCGATGTATTACCGAAAGTTGTCGGAGGGTCAATC  
TCGCACCGATATGCATCATCAATCAGGTCCATGGGAGCCTCTTACGTGCGCCCCTTAACTTTGCAACTCACACCCGAGTCGACACAGACAACATCT  
CTAAACTGAGTGGTTCTGTTGTCAACTACCCTGTGATGCTTCAAGAATTTATCATCATGGCTCAAGCGGGAGCAAAGATGATGCACTTACACTTCCGG  
TCATCAGCAGGTGGATTATATCTTCCATTTGATTCACTGATACCTTTGGACGATGACTCGCTATCGTGTGACCCCCCTGATTTTGAACCGAAGCTCTTA  
CCTCGCAGTACCCTGTCGTATAGTCCCACCTTAGCACTGAAACGCACTCTAGAAACAGATTTGGGTAGCATACCGCGAGGGTCGTTGATCCCAC

> Cb\_clean\_k141\_33467

GCACGGATGAAGGCAAAGATGACAGACAAGGAGGAGTCGGTAGCCAAGACGACACATCTCAGTAACCGGAACCTGATGTCAGGGCTATACACTAT  
CGTCGAAGAGGTCCATGAAGTTCGCTCGATCGTCGAACTGTTTGGGTGTCTCAAGACCAGTGGACATCCTCTAATTGATACAGAAGTTGGAGGACT

GTCAGCAGCTGAGGCAGCCAGGTCTGACGATAAGACATCCGTGGTGGACTCTCAGCGTCTGCGTAACACATTTTGTACATCGTCCTAACTGCTTAC  
ATCGCGAAGCACGGATCTTG

> Cb\_clean\_k141\_54717

GCCTCCTTGTACTCACGCACATTTAACGGTTTCACTATAAGTCCGAGGGGAGTGACTTTGACCCCGCAGGAGAGCTTGAACCGCACCGCTTTACAGC  
TAACACGCCTCGCCAAGTTCTACCGAACGGACGGGGATGAGCTGTTGTCTGGATTTATGATGAAGTTGTCGTCTTTCCAAGGACTAGCGATATTCAA  
CGACGACCAGCGAACTGTCATGAGATTTTCCCGGGCCATCTCACCGACGCTGTACTGCGTACGGAATGTCAAGCCGACCAGTGTGGTCAAAACTCT  
TGAATCTGCCCCAACACACTGCTTGAAGTGTGTCCGCCAGCTCGCACAAGCATACTACTATGTGGTCACGCTACAAGACCAGGAAGCACGGTGG  
GGTAAGCTCAGCAGGGTACACATGGCTCCCCATCGTGTCTACATTAGAGATCCAGCCCACCTGCTTTGTCATTGGTAATGGAAACGGAGGGTTGGCA  
GATCTGCTCCTCACCAGTTATAACGTGGAAGTAGTAGGGCTTGATCTCGAGTCTGATATGCCTACCAATTCTGCAAACTCCTTAACTACTTTCTCTC  
GGAATTTTCGGTGAAAAATAAACTAGATTCAGACAATCAGATGTGTCAATCAACACCACTGGAAATTGGCTAGAAAAGTCAGTAAGGACCC

> Cb\_clean\_k141\_40049

AAGACGGTGGACATAAAGGCTATAGTCGATAGGGTGAGTGCTCGAGATGTCCCAATGACTGGAAAATCGTGAGTTTGTATCCTAAGGAGAGGGAA  
TTCAAGCTTGAACCTCGAATGTTTTCGATGTTGGTTCTCGAGATGAGGTGCTTCTTTACTGCAATTGAAGCTAACATAGCTGAAAATGTGTTCAGGTA  
CTTGCCGCAGCAGACAATGACGAAGTCTAAGACCCAAAACCAAGAAAGGTTTCTCAAGTTCACAGATCCTTTAAGATCTCGAGCTGACTACACCTT  
GTTTTTGGAATTGATCTGACAAGGTGGAACCTCAACTGGCGAGAATTGAGTATCCACGCAATAGGACACGATCTCAATAGAATGTTTGGCATGAAG  
GGGACATTCACGGTGACACAC

> Cb\_clean\_k141\_2670

GGTGGATTATATCTTCCATTTGATTCACTGATACCTTTGGACGATGACTCGCTATCGTGTGACCCCCCTGATTTTGAACCGAAGCTCTTACCTCGCAGT  
ACCCTGTCGTATAGTCCCACCTTAGCACTGAAACGCACTCTAGAAACAGATTTGGGTAGCATAACGCGAGGGTCGTTGATCCCGCCTATGGACTATCA  
GAGCTTTCCGATAGTGTGGCTCAGTGTGCGTGAATTTCTTCACATCAACTCTTCGAGATTCAAACCGAGCGAAGACCATAGCAGACACGCGGGGTCAT  
ATTTCACTACCGTCCAGCTTCCAGATTGACATTGCCGAGGCACATGCCTTAGGAGCAATGAGGCTGGGAAGAGCAATCGCGCATGCTGTGACTCACA  
TCGTGATTCGAGACACATTCAGGACACTTCACCTTCATCCGGAGCGCTGGGATGAGAGTTTGTTCCTCGATCATAACATACGAGTGTGCGTGAAGAC  
GATCCTTGCTACTTAACTACCCCATATTCCAGACACATAAAGATTATCTCAGTCTGCGGTATTCTACCCTGAGATACGGAAGAGTACTGTCCGTAC

TAACCGGATGATCGCGCTGATACGACGAGAGGTTGAGGTTGATCTTCAGCAAAGCAGATCACCCGTTCTGGACAGAGAGAACAGCC

> Cb\_clean\_k141\_3378

CTTAACCTACAGAAAAGAGCAACGGATTGGGGGTTTCTATCGGATTAATTTTGAACCAAGTCTGCGATTACTCTAAAACTGCTCCACACGAAACTTCG  
GCCCTCGGCGACCAAATCTTGAACCTTCAACGTTGACTCTAGCCTGTGAAATCAAACCTCAAGAATCATGAACTTCGAAACCGAGTTTGACGATCTC  
GTCTCAGCGAGCCGAGTGTTTTTCCTTGACACTAACCTGAGCAGTCCAGTTCTGTTGACCGAAATTGAAGACACACGCAAACCTCATCCATGAGTGC  
ATCCTGAAAACGACAAACAAGTCAGAATACTATCGAACTGTTAAATTCCATCGTCAGAATTCAGTAGAATTTCTCATCAAGCTGTGTAAGCTTCGGG  
ATTGGAACGTCACCTTGCTTAAACGGTTTGGTCCACTCCAACCGACAGAGTATGGAAAGATTGAGCGGCACATGCTCAATCCACCTGACTCTAGATA  
CACGAGCTATTACGACGAGGCTAAAGAGGCTGCTCAAGAGCTGGAGAGCGCTCTCGTTGCTGGACTCCGAGCCAGAGGGCTACCGGAAGACGAAA  
TCAAAGGGACAACAGAGATGTTAGGAGGAAACTCGTGTCTCCCATACAGGAGAGCCTATGAAGAATTCTGTAACCTTGTTTCGCAAGAGCGGAAAGTC  
GTGTTAAAAACTCACCTCACACGTGGACGCTAGGAACAGTAGGAGCTGTAAGATTCTGGATCACAAGCACAAACGCTCTGATAGAGTTTGACTCTC  
AGATGTATTACTCAAGTCTAAATCAGGTTCTGATGCTCAAAGATAAAGTTGCAACTCGGTACATGATGCTCGAGCATGTAGGTCCCCTCGGTCTTTTCG  
CTGGCTCTCGAGAGTCATCTGCTCAAGCTATATAAATGGCAGGATTGTACACTCGAGTACTACGGGAACCAGGCGTACAATCTCCTGAAGGCTGTTG  
AGCCTATGTTCAAGACCTGGTTGTCTCACAATGTTGACAACATATTCGGAAGTGATACTGCTTACACACGGATGAAGGCAAAGATGACAGACAAGG  
AGGAGTCGGTAGCCAAGACGACACATCTCAGTAACCGAAATCTGATGTCAGGGCTATACACTATCGTCGAAGAGGTCCATGAAGTTCGCTCGATCGT  
CGAACTATTTGGGTGTCTCAAGACCAGTGGACATCCTCTAATTGATACAGAACTTGGAGGACTGTCAGCAGCTGAGGCAGCCAGGTCTGACGATAA  
GACATCCGTGGTTGACTCTCAGCGTCTGCGTAACACATTTTGTACATCGTCTAACTGCTTACATCGCGAAGCACGGATCTTGGCCCAAATTATATC  
ACGCGAACTCCCAAACCAGTCTGAAAAAGTTGAACGACAGGCAATATCGCAACCTAACTCGGTTCGAGTTACCCCCTTTCTGACTGGAATACAACTG  
AGTGGACAAAACCTGTTTGATTTTGATTACTTCCCAAATTTCTGGAACCTCATGGACGACAAGTCTATATCCTTGTATCGATCCGACAAACACCTCACA  
TGGGATAAAGGACCTCGACCGAAATCGAACCGTCGTCTTCTCCTTGAGTGTCTTAAAGAAAGACGGTGGACATAAAGGCTATAGTCGATAGGGTG  
AGTGCTCGAGATGTTCCCAATGACTGGAAAATCGTGAGTTTGTATCCTAAGGAGAGGGAATTCAAGCTTGAACCTCGAATGTTTGCGATGTTGGTTC  
TCGAGATGAGGTGCTTCTTTACCGCAATTGAAGCTAACATAGCTGAAAATGTGTTTCAGGTACTTGCCGCAGCAGACAATGACGAAGTCCAAGACCC  
AAAACCAAGAGAGGTTTCTCAAGTTCACAGATCCTTTAAGATCTCGAGCTGACTACACCTTGTTTTTGGAAATTGATCTGACAAGGTGGAACCTCAA  
ATGGCGAGAATTGAGTATCCACGCAATAGGACACGATCTCAATAGAATGTTTGGCATGAAGGGGACATTCACGGTGACACACTGGTTCTTTGCTGCA  
GCTCAGATTGTGGTACGGGTCGGAGGCTTACGTCCAGAAGGAATCGAGCAAGACAACCCTCCTATCTCCAACCTTGGCATGGCGCGATCACAAAGGG  
GGGTTTGAAGGACTCAACCAAAAACCTCTGGACAGCTGCCACATACGCTATGGTCGAGATGGCACTGAGCCCGTTGCTAGAGGCTAAAACCATCAGT

GACTATGAAGTTATAGGTCAGGGAGATAACCAAGTTGTTCTGGGTGTCCATTCCCGCTAGCGGTCGTTGCCGGGAAGATGTAATTCCAGAAGTTCGAG  
ATCTCCTCAACGAAGCACTCGAGAGGACGTGTGCAAGTGTGAACCAAGAGGTGAAACCAGAGGAAAACATCGAATCCACATCTGTTCTTACTTATT  
CGAAGGATGTTTTGGTCCGAGGGGTGGAGTACCCTACCTCTCTCAAGAAACACAGCAGGTTGTTCCCTGTCACATCCATGGACTTTCCTTCCGTGAT  
CTCAAACACGCGGGGCTATTCTAGCAGGGGCTATTGCTGGAGGAGAGAACGCACTGTACCCCTTACGAAGCGCAATTATCGGACACTATCACGCTTAT  
CGCTATTTGAAAGCTGCATCCTCCGGGTACTCAATTCACGCTAAAGCATACCCTAAATTAATCACATAGACATACAGACAGCTTTAATCATCCCGTCT  
TCACTCGGTGGGCTTTGTGGACCAGCGTACGCATCTTTCTTCTACAAAGGAGGATCGGATCCTCTAGGTAAAGAGATCAGTGGAGTTAAATTCTTAG  
CCGACGGAGATACGTGCCTAGGCGTGATAGCCTCTCGGACATTGGCATCGCTGGAACACAAGTACTACATCTCCGAGGCTCCAAACATAGCAACTCT  
CATCGACAACCCTTATGGCTTGCCTCTTGAAACAGCGGTCTCACCCTGAGCAAAGTAGGGGCACTGACGTTGGATGCTTTTCGAGGAGTGGTAGA  
CAACCGAGACATCGCCCCATTACTACGAACCTCCGTCGACAAAGCTGAGCTGACACTCAAGGAGGACTTACTGAAGATTCGACCCTTCAACCCTAT  
TCTCATACACGACCTATTTGAGGCGTCTGGGTTCCGGTCTATAAACTTATGAAGAAGATGTTTCGTGCACACACGAACCTATTCAGACGGTGGCTCAA  
CAGAACAACGGCCAAATAACTCACACATTTTGTAGAGCAGACGTGAATGAGATTATGTCATACAAAAGATGGACGAAAGGGCTACTAGACCTCCGG  
TACTCTGGGAAATCATCTTTTGTAGTTGTGTACCCTGTACAGATCTTACTGGGCAGTCGACCTTAAAGGAGTGACAAATGAACAACCACTGGACTACA  
CTCATTGGAAAGCTCCCGACAAGAAGCCAAGCTCGATACACTGGTCGTCTCACTCCGCGGATAACCTACTCGATACAAGAGGACCACTGACAGGAT  
ATATAGGGACTGCCACCCGAGAGAAAAGGTCTGGAGCACGGATACAAGATTGTGGACACCGGAGCCCCGTCTAGATCAGTTATGAAGCTTCAACTGA  
TCCGTAGCCAAGCATAACGGAATCCGTCGTTCAACAACCTTGTTAGACCGAATATCTCTCACTAGATCTCCAGTCCCTCTTTCCACAATATCCGATGTAT  
TACCGAAGGTTGTCGGGGGATCAATCTCGCACCGATATGCATCATCAATCAGGTCCATGGGAGCCTCTTACGTTGGGCCCTTAAACTTTGCAACTCAT  
ACCCGAGTCGACACAGACAACATCTCTAAATTGAGTGGTTCCGTTGTCAACTACCTGTGATGCTTCAAGAATTTATCATCATGGCTCAAGCTGGAG  
CAAAGATGATGCACTTGCACTTCCGGTCGTCAGCAGGTGGATTGTATCTTCCATTTGATTCACTGATACCTTTGGACGATGACTCGCTATCGTGTGAC  
CCCCCTGATTTTGAACCGAAGCTCTTACCTCGCAGTACCCTGTCGTATAGTCCACCTTAGCACTGAAACGCACTCTAGAAACAGATTTAGGTAGCAT  
ACCGCGAGGGTCGTTGATCCCGCCTATGGACTATCAGAGCTTTCCGATAGTGTGGCTCAGTGTGCGTGAATTTCTTTCACATCAACTCTTCGAGATTCAA  
ATCGAGCGAAGACCATAGCAGACACGCGAGGTCATATTTCACTACCGTCCAGCTTCCAGATCGACATTGCCGAGGCACATGCCTTAGGAGCAATGAG  
GCTGGGAAGAGCAATCGCGCATGCTGTGACTCACATCGTGATTTCGAGACACATTCAGGACACTTCACCTTCATCCGGAGCGCTGGGATGAGAGTTT  
GTTCTCGATCATAACATACGAGTGTGCGTGAAGACGATCCTTGCCACTTAACTACCCCATATTCCAGACACATAAAGATTATCTCAGTCTGCGGTA  
TTCTACCCTGAGATACGGAAGAGCACTGTCCGTTACTAACC GGATGATCGCGCTGATACGACGAGAGGTGAGGTTGATCTTCAGCAAAGCGGATCAC  
CCATTCTGGACAGAGAGAACAGCTGTGTTTTTCAGGAGAAGGGTCGTCAGCATTAACGGAGGCGTTGGTGGTACATGCAGCAATTAGACTCAGGTGG  
CTATATGCGATAGGTCATCCGAAGGCCTCCTTGACTCACGCACATTTAACGGCTTCACTATAAATCCGAGGGGAGTGACTTTGACCCACAGGAGA

GTTTGAACCGCACCGCTTTACAGCTAACACGCCTCGCCAAGTTCTACCGAACGGACGGGGATGAGCTGTTGTCTGGATTTATGATGAAGTTGTCGTC  
TTTCCAAGGACTAGCGATATTCAACGACGACCAGCGAACTGTCATGAGATTTTCCCGGGCCATCTCACCGACGCTGTACTGCGTACGGAATGTCAAG  
CCGACCAGTGTGGTCAAACTCTTGAATCTGCCCCAACACACTGCTTGAAGTGTGTCGCCCCAGCTCGCACAAGCATACTACTATGTGGTCACGCT  
ACAAGACCAGGAAGCACGGTGGGGTGAGCTCAGCGGGGTACACATGGCTCCCCATCGTGTCTACATTAGAGATCCAGCCCACCTGCTTTGTCATTG  
GTAATGGAAACGGAGGGTTGGCAGATCTGCTCCTCACCAGTTATAACGTGGAAGTAGTAGGGCTTGATCTTGAGTCTGATATGCCTACCAATTCTGCA  
ACACTCCTTAATACTTTTCTCTCGGAATTTCCGGTGAAAAATAAACTAGATTCAGACAATCAGATGTGTCAATCAACACCACAGGAAATTGGCTAG  
AAAAGTCAGTAAGGACCCCTTCTGATGACTGAAACCAATACTACATCAACTGTCATTGTGGACATCACAGGTCCCGCTGCTATCGACGTTCTCAGTTC  
CACACTGGATGCTATGGACACCAGGTCTGTGGTATCTGCATACTGCAGGCTTATAGGCTCGAGAGATGACATCTCTGGATGTATACGCTCTCTTCCTC  
GCGTCGTAATGTCTCGTCTGTGGGTAGTTTCACACTCAACGTTTGAAATTGAGATAATCCTTGAAGTATCTCGTACGAACAGCAGCGCTCACCTGTGC  
ACAGGTGCTGGTCCCTCTCATAGACTATCCTCTTGATCGCGCGCACCACGAGTTGATTCCCCAGAGACGAGACGAACTGTTGGAAGCGGCTACTCGAT  
CAGTCCACGCGTGGACTGATGAGACGTTTCCGAGCATGTATGAAATCACTCGATCACTATGCAAAAGTCTGCTCAATAAACCGAAGTCTACACAGTT  
AAGATACACTGAGCGCTATGACCTGATATTAGCGTACTGTGTGTTGACAGTGCAGGTTTCCCTCCTCACCAGTGGAAGTGGTGCAGTCGTGGATACTA  
GACGAGAGAGCTGAGACAGATCTATTTTACTACTGTCTGAACGAGTCAACTATATCACATCTCATCAGATACTCTGCCAGACTGCTGACGTGGTCAG  
ATACCTCGATGACCGTGTGAATCTCCTCCCTCACTGGAACTTAGGCAAAGTCATCACTTACCCAAGTGCTTGATGCAACAGTTCCAACAGTTTAA  
AGTAAAACCGTGCCGAAAGCAAAGCTTAAATCTTCTTTCATCCGACCGAAACGCATTCCCCACCATTTTATTCATCTAGTTAGTT

> Cb\_clean\_k141\_36621

AGTCGAGACAATCGTGAAACAGGTCAGCACAAGAAACATTCCGGAAGATTGGAAAATTGTTAGTTTGTACCCGAAGGAAAGAGAATTCAAACCTG  
AACCTAGGATGTTTGCCATGTTGGTGCTTGAAATGAGATGTTTCTTCACTGCCGTTGAGGCAAACATCGCATCTAACATATTCAAGTACCTCCCTCAG  
CAGACGATGACAAAAACCAAGACACAGAATCAGGAGAGGTTCCCTGCGATTTACAGATCCGTCAAAGAACAAGACAGACTATACCCTCTTCTTGAG  
ATCGACCTGACCCGCTGGAACCTGA

> Cb\_clean\_k141\_39090

CTACCTGATCCAAGTACAGAAATCGACCACTGTGAACAGTGTGTTCCATCCGAGCAATCAGTCAATATGATCATCTGGGATCGGAATAAGCAGAGAA  
TAAACGGAGGACTGAGCTCTGCTGGGTATACGTGGATACATATCCTCCCTTACCTAACTCTCACTTCGTCAACACTCATTGTGCGGAATGGAAATGGT  
GGTCTGGCGAATCTCCTGCTCAACTGCTTCGACACCCAAGTGATAGGCATAGATCTAGAGTCGGACATGCCCAGTCAAGTCGCCACCTTGCTCAATT

ACATCCCCCTGGAGTCGAATTACACAACCGAGACCGTTTTATCCAGTCAGATTGGTCAATAAATTCATCAGGAAATTGGTTATCTGGTGATGTTCTGA  
GCGGGCGTGCTGAATTCTCTTCTTCTGGTGTCTCAACAATCTTCTCGATATGACAGGTCCATCGGTTGGTGATCTTGTTCCGACAATCGAGGACGCAAT  
GGACCATTCTCTGGTGGAGTCCGTCTGCGGCAGACTAATCGGTGCGAACTGAGGAGATATTTGATGTAGTCAGATACTTAAGACAGTCGCATGAGGTC  
CAGGCGTGGGTTTTCTCACGGTCAACAGCGAGTACTGAAGTCCTAATTTCCATCACACGCACTCGTCGGTGTCTTCATGAGTGCAATGGAGCGACA  
GCGCTCATACACAAAGAGGTCAGTGCACGCCAGCACGCATTGATCCCTGAATTGTGGGACGAATTATTAGAAGCTGCTACGCTGTCGTCAGTACGAT  
GGGATGGAGAGTCGACTCACGAAGCCTTCAACTATATGAGGAACCTCTGCAAAAGTCTACTAAACAAACCGAAATCGTCGCAGCTGAAGTACCGTG  
ACAGGTACTCACTCCTGATAGGCTACTCTGTTCTGTTTGCGGTGAAGTCAAGATGCCTGTGCAAACCATAACAAGGATGGATTGCAGAAGAAGAGAT  
TGACACCGATCTGTACACCTACAAGCTTAATAGAGCTACAGTCACTCATCTCCTTCGGTACGTC

> Cb\_clean\_k141\_44574

CAGCGGTCGAATCTTGATGAGATCCTCTCGCAAGGTCTTCTCTGCATCAGTCACAGTTGCTCGAAGTAGACTGTTGATATCAGTGTTGGACACAGAG  
CCCCTGAATGCTTCCAGAGTCAAGTGTCCGACTCTACTGAGGGCAGACGAGGGAGTTTCCAGAGGAAGACCATACGGATTGTGCGAGTAAAATCTCG  
AGATTTGGTTCTTCAGACATCCAGTACTTGCATTCCACAGCTTTCAGACTTGACGAAGCAATGGATCCAATTGTTCTTCTGATTACGCCAACAGTCT  
TAATCCGCTTATCTCCTTTCGAGCGGGTCAGATCCCCCTTGTAAGAAGTAAGACGCAAAGGCAGGACCGCATAAGCCTCCAATACTCGAA

> Cb\_clean\_k141\_57732

CACGCAGTAGGACCATCGTTCATTCTCAGGGCGATCTCAACGTCTATCATACTATCAACAGTTCGGGATACTTTCCGAACACTGCAACTTCATCCAGA  
ACGATGGGACGAAAGTTTATTCCTGGCTCACAATATCAAGATCTGTCTCAAGGCTTGTGGAGCATACTTCGGGCATCCGCTGTTCAACACTCACAGA  
GAGGCATATAGGTATCGTGCTTCAAGCCTTCGATATGCAGGAAGCATGAGTCTCGAACAGAGACTGACCGCAGCTGTACGGCGAGAAATCGCAACA  
TCGTTCCGAACGGCTGGACACTCTGTGTGGAGACAAGAGATTCCGGTGTCTCCGGCGATCACAGCTCAGCATTGGTTGAGGCTGTGACACTCTCA  
GCTGCTCTTCGTATCCGTGAAGTGTATGGCCGGTGATGAAAATGCAGTGTTATTTGCGAATCTCTTCTCTAGCTACATGCGAATTCCACGTGCAATA  
GCGAACACTACCGGACAGACTCTTGAGATAGTGCGTCTTCGTTGTAC

> Cb\_clean\_k141\_64068

ATCATTTTCAGAGTACGAAGTCATCGGTGAGGGCGATAATCAGGTTGTCCGAGTCTCCATCCCAAACCTCAGGGCGAACCAGAGAAGATATCGTTCCGG  
AGGTCCGTGATATGCTCAACGATGCTCTCGAGAGGACATGTGCCAGTGTGAATCAGGAAGTTAAACCTGAAGAGAATATTGAGTCCACAGCTGTGC

TTACTTACTCCAAAGACGTTCTCGTCAGGGGAGTGGAGTATCCAACCTCCCTGAAGAAACACAGCCGACTTTTCCCGGTCACTTCTATGGATTTCCTCGGTTCGTTTCGAACGCTCGAGCTATATTAGCTGGGGCAACGGCAGGCGGAGAGAATGCCCTGTACCCCTTGAGAAGCGCAATCATAGGACACTACCATGCGTACCGGTACCTTCTTGCTGCAGGG

> Cb\_clean\_k141\_25946

AAGAGCAACGGATTGGGGGTTTCTATCGGATTAATTTTGAACCAAGTCTGCGATTTCTCTAAAAGTGTTCACACGAACTTCGGCCCTCGGCGACC  
AAAATCTTGAACCTCCAACGTTGACCTAGCCTGTGGAATCAAAGTCAAGAGTCATGAACTTCGAAACCGAGTTTGACGATCTCGTCTCAGCGAGC  
CGAGTGTTTTTCCCTTGACACTAACCTGAGCAGTCCAGTTCTGTTGACCGAAATTGAAGACACACGCAAAGTCAATCCGTGAGTGCATCCTGAAAACG  
ACAAACAAGTCAGAATACTATCGAACGGTTAAATTCCATCGTCAGAATTCAGTAGAATTTCTCATCAAGTTGTGTAAGCTTCGGGATTGGAACGTCA  
CATTGCTTAAACGGTTTGGTCCACTCCAACCGACAGAGTATGGAAAGATTGAACGGCACATGCTCAATCCACCTGACGCTAGATATACGAGCTATTAC  
GACGAGGCTAAAGAGGCTGCTCAAGAGCTGGAGAGCGCTCTCGTTGCTGGACTCCGAGCCAGAGGGCTACCGGAAGATGAAATCAAAGGGACAA  
CAGAGATGTTAGGAGGAACTCGTGTCTCCCATACAGGAGAGCCTATGAAGAGTTCTGTAACTTGTTCGCAAGAGCGGAAAGTCGTGTTAAAACT  
CACCTCACACGTGGACGCTAGGAACAGTAGGAGCTGTAAGGTTCTGGATCACGAGCACAAACGCTCTGATAGAGTTTGACTCTCAGATGTATTACTC  
AAGTCTAAATCAGGTTCTGATGCTCAAAGATAAAGTTGCAACTCGGTACATGATGCTCGAGCATGTAGGTCCACTCGGTCTTTCGCTGGCTCTCGAG  
AGCCATCTGCTCAAGCTATATAAATGGCAGGATTGTACACTCGAGTACTACGGGAACCAGGCGTACAACCTCCTGAAGGCTGTCGAGCCTATGTTCA  
AGACCTGGTTGTCTCACAATGTTGACAACATATTCGGAAGTGATACTGCTTACACACGGATGAAGGCAAAGATGACAGACAAGGAGGAGTCGGTAG  
CCAAGACGACGCATCTCAGTAACCGGAACCTGATGTCAGGGCTATACACTATCGTCGAAGAGGTCCATGAAGTTCGCTCGATCGTCAACTGTTTGG  
GTGTCTCAAGACCAGTGGACATCCTCTAATTGATACAGAACTTGGAGGACTGTCAGCAGCTGAGGCAGCCAGGTCTGACGATAAGACATCCGTGGT  
GGACTCTCAGCGTCTGCGTAACACATTTTGTACATCGTCCTAACTGCTTACATCGCGAAGCACGGATCTTGGCCCAAATTATATCACGCGAACTCCC  
AAACCAGTCTGAAAAAGTTGAACGACAGGCAATACCGCAACCTAACTCGGTTCGAGTTACCCCTCTTTCTGACTGGAATACCACTGAGTGGACAAAAC  
TGTTTGATTTTGATTACTTCCCCAATTTCTGGAACCTCATGGACGATAAGTCTATATCCTTGTATCGATCCGACAAACACCTCACATGGGATAAAGGAC  
CTCGACCGAAATCGAACCGTCGTCTTCTCCTTGAGTGTCTTAAAAGAAAGACGGTGGACATAAAGGCTATAGTCGATAGGGTGAGTGCTCGAGATGT  
CCCCAATGACTGGAAAATCGTGAGTTTGTATCCTAAGGAGAGGGAATTCAAGCTTGAACCTCGAATGTTTGCGATGTTGGTTCTCGAGATGAGGTGC  
TTCTTTACTGCAATTGAAGCTAACATAGCTGAAAATGTGTTCAAGTACTTGCCGCAGCAGACAATGACGAAGTCTAAGACCCAAAACCAAGAAAGG  
TTTCTCAAGTTCACAGATCCTTTAAGATCTCGAGCTGACTACACCTTGTTTTTGGAAATTGATCTGACAAGGTGGAACCTCAAATGGCGAGAATTGA  
GTATCCACGCAATAGGACACGATCTCAATAGAATGTTTGGCATGAAGGGGACATTACGGTGACACACTGGTTTTTTTGCTGCAGCTCAGATTGTGGT

ACGGGTCGGAGGCTTACGTCCAGAAGGAATCGAGCAAGACAACCCTCCTATCTCCAACCTTGGCATGGCGCGACCACAAAGGGGGGTTTGAAGGAC  
TCAACCAGAACTTTGGACAGCTGCCACATACGCTATGGTCGAGATGGCGTTGAGCCCGTTGCTAGAGGCTAAAAACATCAGTGACTATGAAGTTAT  
AGGTCAGGGAGATAACCAAGTCGTTTCGAGTGTCCATTCCCGCTAACGGTCGTTGCCGGGAAGATGTAATTCCAGAAGTTCGAGATCTCCTCAACGA  
AGCACTCGAGAGGACGTGTGCAAGTGTGAATCAAGAGGTGAAACCAGAGGAAAAACATCGAATCCACATCTGTTCTTACTTATTCGAAGGACGTTTT  
GGTCCGAGGAGTGGAGTACCCACCTCTCTCAAGAAACACAGCAGGTTGTTCCCTGTCACATCCATGGACTTTTCTTCCGTGATCTCAAACACGCG  
GGCTATTCTAGCAGGGGCTATTGCTGGAGGAGAGAACGCACTGTACCCATTGCGAAGCGCAATTATCGGACACTATCACGCTTATCGCTATTTGAGAG  
CTGCATCCTCCGGGTACTCGATTACGCTAAAGCATACCCTAAATTAAATCACATAGACATACAAACAGCTTTAATCATCCCGTCTTCACTCGGTGGG  
CTTTGTGGACCGGCGTACGCATCTTTCTTCTACAAGGGAGGATCGGATCCTCTAGGTAAAGAGATCAGTGGAGTTAAGTTCTTAGCCGACGGAGATA  
CGTGCCTAGGCGTGATAGCCTCTCGGACGTTGGCATCGCTGGAACACAAGTACCACGTCTCCGAGGCTCCAAATATAGCAACTCTCATCGACAACCC  
TTATGGCTTGCTCTTGAAACGGCGGTCTCACCCCTGAGCAAGGTAGGGGCACTGACGTTGGATGCTTTTCGAGGAGTGGTAGACAACCGAGACAT  
CGCCCCATTACTACGAACCTCCGTCGACAAAGCTGAGTTGACGCTCAAGGAGGACTTACTGAAGATTCGACCCTTCAACCCCATTCATACACGAC  
CTATTTGAGGCATCTGGGTTTCGGGTCGATAAACTTATGAAGAAGATGTTTCGTGCACACACGAACCTATTCAGACGGTGGCTCAACAGAACAA

> Cb\_clean\_k141\_11227

AACGTTGACCCTAGTCTGTGGAATCAAACCTCAAGAGTCATGAACTTCGAAACCGAGTTTGACGATCTCGTCTCAGCGAGCCGAGTGTTTTTCCTTGA  
CACTAACCTGAGCAGTCCAGTTCTGTTGACCGAAATTGAAGACACACGCAAACTCATCCATGAGTGCATCCTGAAAACGACAAACAAGTCAGAATA  
CTATCGAACGGTTAAATTCCATCGTCAGAATTCAGTAGAATTTCTCATCAAGTTGTGTAAGCTTCGGGATTGGAACGTCACCTTGCTTAAACGGTTTG  
GTCCACTCCAACCGACAGAGTATGGAAAGATTGAACGGCACATGCTCAATCCACCTGAC

> Cb\_clean\_k141\_32680

CCTCCGTCGACAAAGCTGAGTTGACGCTCAAGGAGGACTTACTGAAGATTCGACCCATTACTACGAACCTCCGTCGACAAAGCTGAGTTGACGCTC  
AAGGAGGACTTACTGAAGATTCGACCCTTCAACCCCATTCATACACGACCTATTTGAGGCATCTGGGTTTCGGGTCGATAAACTTATGAAGAAGA  
TGTTTCGTGCACACACGAACCTATTCAGACGGTGGCTCAACAGAACAAACGGCCAAATAACTCACACATTTTTGAGAGCAGACGTGAATGAGATTATGT  
CATACAAAAGATGGACGAAAGGGCTACTAGACCTCCGGTACTCTGGAAAATCATCTTTTGAGTTGTGTACCCTGTATAGATCTTACTGGGCAGTCGA  
CCTGAAGGGAGTGACAAATGAGCAACCACTGGACTA



> Cb\_clean\_k141\_5086

CCTCCGTCGACAAAGCTGAGTTGACGCTCAAGGAGGACTTACTGAAGATTCGACCCATTACTACGAACCTCCGTCGACAAAGCTGAGTTGACGCTC  
AAGGAGGACTTACTGAAGATTCGACCCTTCAACCCCATTCATACACGACCTATTTGAGGCATCTGGGTTCGGGTCGATAAACTTATGAAGAAGA  
TGTTTCGTGCACACACGAACCTATTCAGACGGTGGCTCAACAGAACAAACGGCCAAATAACTCACACATTTTTGAGAGCAGACGTGAATGAGATTATGT  
CATACAAAAGATGGACGAAAGGGCTACTAGACCTCCGGTACTCTGGAAAATCATCTTTTGAGTTGTGTACCCTGTATAGATCTTACTGGGCAGTCGA  
CCTGAAGGGAGTGACAAATGAGCAACCACTGGACTA

> Cb\_clean\_contig\_154

GCCGTGTTTCAAGGCTGTGCAGGATCTGCTAGAAATGGGCATTGAGTCTGGTCGGTCGTCATTTCGAAGGTCGAGATCGATTTGTCTTGTTGCTCTTGTTAC  
TCTTTTGGCCACAATACACTTTTCAAATTCTCATTATAATCATAAAGAAATGTCTTACTCAGTACAAAGGTCCATCACAACCAGATACCAAGCAACCTC  
AGTTGTTTCTACAAACATTAGTAAGAGGTAAATGTCTCAAGTGACCTTGAAAGATTTGCATCTGGGATGAGTGATGAATACATTCCCAGGACACTTT  
CAGAGTACAAACAGTACAGAACCTTTGCACATGACATTCTCTGTTTGGGTAAATTTTCAAGGGAATTTTTATGATGATGAGTCATTACAAATAGACAAG  
ATCAACTTAAAGAGTAATGATCCCAAGATTATCACACAGAAACCAGACCTATACTCTATAGAAGGAAATTTACTGAAGCTATGTGAGGTGTCTCTCAC  
GTATGATTTGGAGACCACTGAGAACAAATAAGAACTCAAATATGATGACTTAATCGAATTCATAGAGAGATCAACTGATCTGAATGTCAATTACACCA  
CATTATTAATTGATTTGACTGACGCAGAATGGACAGATAGTATCCCTCAATACCTGAAAATCACAAAGTTCTCTTGAGAGATTTCATTGACAATTTG  
GTCAAATTCACTCAACCAAGCTAGGAATCGAATTCAGAAAAACACTCTCTCTTAATGTAAACATATCTTTCCCATTTAGCTACAATGAATCAGACTT  
GTATAATCAAATAAAATCACATCTCAACATAACGGAAGATCTTAAAGAAGATTTTGATATTTACACAAGAGGGTTCGGAAACTTAAATTTGGAGTCTT  
CAGAAGTTAAAAATTATCTAGATAAAGTGACAGACACAATATTGACAATGGACAAACATGACAGGCCTTTTCCTTGCAATCATCGAATAGATCCAATT  
ACATACAGAGGTGAATGGGACGAATTTCTTTCAAACCTTCCACCACTGAGAAGATACCAGTAGTCTTACAGCTTGGGATGCCAACTTAACAGAC  
GAGATTCAGACTTTATCTAAGACAGAGATTTATCAAAATTTTCATGGACGACAAGAAGCACTATGGCGGCTATGTTGATCTGATAAAATCGTCAAACAC  
CTCTGTCGACGAATATTTAGAGAATGGAATCATGAAGTTATTCCTAACAGAATCTCAACTTGCCTCTGAAATGATGTCTGGACCAGGCAGGAAAAAG  
TATCTAAAGCAAAATTCATAAAGTTAGATAGAAAGGCACCAACACATTTGAAACCAGACATTTCCCATGAATCACTGTTATCAGAATTGACAGATCA  
AATAAATGAAATAATGCCTCAAGAGTTCCTGAAAACCTTACGGAAGAGCAGATTACAATGTTTGTGGAAATAATTTAGGATCATCTGTCAATTATTGCT  
TAAACAAGCTATCTGAAAATGGTACTGATTTTCTTCTTCAATTTTACACAAGATTATCAACTGAAGTTATATTAAACTCAATGAGGCGTAGAAAACAA  
CGAGAATACGTTCTTGACACAGCGGTTTTGAAGGCGTTTACTTTCTCATAGCACCAGGCCCTCAATTGAGGACTGAAGCCAACGTTGAATTCATTA  
AAATCATTAGCTTTGTAGAACCCATTTATAATAAATTATCAAGAGAGTGGCATCTAATTGGAGATCACTGGGAGTCTAGCTGGCTTTCTGTAGACACG

GATAGGTTAAAACACTGGTCTCGTAGCAGGCATCGTGTAATCTATCTCTGATCGGGTCTGCAGACAACTATTGAGACCCGGAGTGACTCTTACTA  
ATGCATTGTCCGAAGAAATCAACAACCTCGAATTACACACTCATGAGTCTCATTACCTTGAAAACAAGTCCAATACTTCTACAACCATTTCAGACAAC  
AGATATTTCTTGATGAAGTGTCTCGGCGACAGAACTTGAAAGGACTGGTCTCAAAATTCCCAAGCAGAGTTAATTCAATATTACAGTCCGTTATACT  
ACAACGAAACAACCTCCTTTGTTTTGGACATGTGCTCTCACAAAGTGGATGATTTTGTTAAACTTCAGCATGTAAAGCGAGATGAGAACATAGGACAT  
TTGGATGAAACAACGACCGGTGTTGTTGGAGCGATACCCAGGATATTCACAAAAGGAAATTATGTACCCATAAAATACTCTATTAATGAAATATACTG  
GTGTATGATGTACAACAAAGATAGACAGAATCAAACCTCAAGATGCTATGAAAATTCTGAACAAGATTGCCAAGGAAGAGAGAAAGTTTGACAAAGA  
AATACAGTCTAGAAACACTGACAAGGAGAACTAGCACATTGTTTTGGATTTACACTACATCCCAAGATATACACCACATAACAACAAAAACACCC  
GAATCACATTACTTTAGCGCTCTGGCCGTTTCATATAGGTGTCGCATTACAAGATAGGCATCCCGAGAACTTCTCGCCTCAATCAGGCTGGATGTCTGA  
CAATAAGCTCAATGAGATTTTATCAAAAAATCTGTCTGAATACGCCACATTCAAAGCATCTGTGAACACCATAAAAGATTATGTGAGAAATGATGATC  
TTTCAGAGCTAAAGGAAATTGGCCGAAGGACAAAATGTATTGAGCTGATCTATGAGATTGTGAACAATGAAAAATTGACAACCTGCTGCTGACATTGC  
CATGAGCTTTTCAGGCAACAAATCAACTCAGTTTAAAACCGTCATACAAATATTCAAAAAGAATCAAATTGGTGGCGTGAGAGAGATCCTCATATTAT  
ACATAAAAGCTAGAGTCCTCATAAATCTGTGTGAAGAAATATCAAGACTTCTTTCTAAGTCTGATAAACGTGAGACATTGACAAAGGGTTCGTGACAA  
AAGGCTCATGATGCGCGGTGATTACGAAGAACTAACTTCCAAATTTGAAGAAGGCACTCCATTATACATAGTAAAAAACTCTTACGATATGTCTACTT  
GGTGTCAAAAATTCATCCCAACAATATTTCTCCCTATATATAATCATCATCATGCCTGTTTGGGTAATCTGTTATCCTTGTGCAGGTTTGTGTTTGATTAAAG  
CATTGTCAGAAAGAAATTGAATACCCTCAGAAGCTCGTGACAGAATGGATAAAACATCCAGATGTTAAACATGATGAAGATCATATGCAATATTATAA  
AGAAAAGTTTCAGTCAGATAGGCAACCGAAAATGCTAAACTTCAGCAACATGGGACAAGGAATTCTGCATTATAATTCAACAGTTTTGGCGCTGTCT  
TGTCAGAGTTTGAGGGACAAGTTGTTTTACCTGTGTCTTGAAAAACTATCCAGGCCCATTCGCGATAAGATGGAAGACTCGTGTAGGATCAGATGATA  
AAGGAGACACAATCTTTGCAGATATGTCTAAAGAAGATTATATATTTCAATGTCAACTTCTAGAACAGTGCGCATCAGTTTCGGAGCGCCTGCATTCA  
ATGGACTTATCAGTTAAATCTGCTTCGGGAAATGTTATTTACGAGTTTAACTCCGCTTATATGGCAAATCTTGAAGTACAGTCACCTGTCTGAAATTC  
ACCATGGCAGCGGTTGACATGATCGGAACAGATAGCTGTACAGAGTTTGTTAATGAATCTTATTCTAGAATAAGGCAGCTTCGCGAGAATGGTGCAA  
ACTCCCTTCTATGTTACATCGCCCATATTTATAACAAAGATCATTTTGACGAAATCTTTAGAACAGGAGAATCAATGACGAATGATCCAACCAAAAATAT  
TCAACCTTCCACTATCTAAAATACCTTATGATCTTGAAACTACCCAATATATGACTGTGATGTTCAAGATATGGTAGGTCCAGAATATCATAATTATAG  
AATTTTCAACGATCCAGAAACACCAGAAAGAATCTTAAGGTTATTGTACACTTCTCATTTTGATGCTGATAAATCTAGCGTGATACCAGATGATGACG  
AAGGCCTGTTTAAGAAGGATGATTTTAGGATAGCTCAAGGGATGGTCAGGCAGTTATCAAACATGAGAAATAGACTGAATCTGGATAGAGAATCTAT  
ACATAAATTTTTAGAAGAAAACCCTTTTTTAATTGTCCGTGGCCCTATGACAGTCGAAGAAACAGCCATTCTAATTGCAGCAAAATTATACACCAGAG  
GTGCATCTAAAAGCTTAAGAAGAACATCACCTGCAATCTATCTAGGCAGACTAGCTGCCTTTGAATCCGCGAGGGCTTGGAATCTGTTTCAACAAGA

TGGCGCAGAAGAAACAAAGGTGATAAAGCTTACGTTCTCAGAATATATAAAAACTCTATATGAGTCAATCAAAATAGAGCCTAACTCAGATTCAATA  
AAGAAATTCAAACCACTCATATTCCCGCAATACAATTCTTTTGATGTGGTTACTCAATATGTTTCAAATTTTGGTATCAGGAAAGAGAGTCATAAATTG  
TTTTCTCAATCAATAAGAACCTGGATCTTAAATAATTTCAACTATAATTTACCAACAGCTTAAAAAGCATTCTCGAAACCTCTTTTAACATGCGCAAA  
TCAGCAACCAGGGAAGATGTTATGGAAC TAAGAAAAGTCGTGCCTTTTGACATCAGCAATTATGACACCTTTATAAACAATTGTGCGAGAAAACAATG  
TTAGGCCACTAGATTTATTTTATTATCTAACAAAGTTTACAAGAACACCAATCTAAGAAGAGCACAAGTCTTTGCAGTAGGGCCTAGCACTAGTTCT  
TTGAACCTGACATTGAGTAATCTCAAGAGATATAACCACCTAACTGGATCAATCATGGAAC TTGACACAGGCATTGATATGCAAAGAATAGAGACAG  
CCTCAACTTTAGATCGAGATTTTCGAAATAATGAAATTATCTTTCAATTTCTTGATGCTAGAAACACAGGGGACACTAACGAACAAATATGGTTTAATTG  
AACAAAGGGATACTTAATGAAATCAGTCTTGATGGAGTTACATTTCACTCGCTAACAGAGACAATAATTCGGAATATAAATAGCATATCTGGATTTGACA  
ATCACATTAAGCGAATCATAATCCTTCTTGTCATCTAAAATATTAACAAAATCGGAGTTCTTGTCAAAAATATTGTCATGGAAACAGTTTAGCTTTAATTA  
TCTAAAAAAGCAAAAGAGAGACATTCATGGAGATTGGCATGGAGATCTCTCTGTTCTAATTA ACTATTCAAACGAATGTTTCACAATAAACAGACA  
AATAATTACAAATACATTGAAATCATGAGAGTTAACGATTTAAGAGACTTCCAGATTGCCTTCAGAAAATCATTACGATTACTTGGTTTCACTGAAAG  
TGAGTTCACA ACTAATGGACCAATAAAACCAACAGAGTATTACGTCTCAAAC TCGAACGTTTACGAGAGCAGAGGATACTCTAAATTA AAAACAAAG  
ATTGAACATTCATAAGAACCCAAACTTCAAATTCTTAAAACTGACAGATTTGACGAATTTTAAAGTGAAATTTGAAGTAATAAAGACTGGTGCCACT  
ATCATAAAACTAGTGGATCAACATTCGCTTAAGCACATTGATGTGGCTCATTTCCTGGTCATTACTACCCTGTGGAAATTCCTTAAAGTTCAAATG  
TCAGAAAACATATTCGTCAATGGTTTACGAGGTCTAAAACTATTCAAAAATAGAAAATGGTTTTTTGATGGAAAGATTGTATTCATTTAACACAAAGGG  
TGCAATTGACATATTACAAAATCATATTAATTTAGAACACTTGAAGGCTGTGAATATAAGTTCCAAAGCTAGACTTCAAGAATACATTAACGATATGGA  
ATATGATCAAGAAGATTATGAGGGGAATTATGATGTTGAAGTGAATCCAATAACAGAAGTCCAACTCAGGATGGACCTGGTTAGACAGACTGATATC  
ATGAATAATAACAGATCAATAAAAGATATGTTCCAAGATGCTGCAAACAAGCTCATGACAGAAGATTATACGAATTTAATGCCAGATGAGGACGTTCC  
TTTGATTGATCAGTTTAAGGAGGATGCCGGTGTCTCTGATTTTATAAGAGCCTTAGGACAGAATAAGTACAGAAAGAAAAAAGATTTTATATGGTCA  
CAAAC TTACGATTAAATACAACATTCGTAAACAGAGTTTTGGACCTCTTCTTCAAAGGAAACTCTATAATGTCAGAACAGCCCAATGACCTCCCTGA  
CTATGGAATACACTGTTTATCTGTTAGAGATCAACCTGAAGCAGATTACAACCTCATTTCATGTGTTTAAATTACATTTGTCTAAGAATCTCATCTTTA  
ACTGGGAAAGACATGAATTATATACAAGTTGAGATATTAAAACTGAAGGATAGAAAGCATAATTTTAACACATTGCCAAGATTAAACAAGTATCTAAC  
AAAATTCTCTCCAGGATTGTATGAATTACTTGATCAAAATGCATTTGATGGACAGGATGAGGAGTCTGAGGGAGAGTTTGATTTTGAATATCATGGA  
TAATGAAAGTTTGTTGTTTGTGGAAAAATCTATCTTTTAAAC

> Cb\_clean\_k141\_63059

ACAAAACCTGAAACAAACCAAAACAAAATGGATCGAACCTCCATTGCCAAATCCATTGCCACCATCCAAGGAGCAGCAACCAAGGTTTTTGACATCA  
TATCAGGTACATCTTCTTTTGATTATATGCCTGAAAACCTCTGGCCAATATTCTCAATACAGAAGATGCATGCATGATGTGATTTGTGCGGCATTACTCGA  
TTCCGGCCATTACAAGTATACTGAATTGACTCTATCAGACTTTGGTATCACCATCATGGACAAGAAGATCAAAATGCAAAAGCCTGATCTTTTCATGG  
TTCAAGAAAAGGAAGTGTTAATCGGTGAAGTCACATGTACATACTCACCTGAGCAATCTATAAAAGAGAAAAATAGGCAAGTATCATGAATTCATAAA  
AATCCTTGAAAATAATGGATTCAATGTGACTTTCACTGTGCACACAGTGGACTTGACAAATCCTGATTGGTCTGAATCACTTCCTTTTATCAGCAAAC  
AATATGTTGATATATTTGAAGATATGTTAACAGTACTCAGAAACATCCACACAAATCCCAAGTTTTTCAGCCATACGGAAGTCTGAATCTGGATCTTATA  
GTATTGACAGATTTCAATTCAAGCTTGAAGATGAGACACTAACAAGTCTAGTTGAGGAATGCACAACAATAAATATGGAACCATCTAAAATAAAGGC  
TAAACTAAAGGGCACATCAAGATCTTCTGATCAATTTTATGTGGATCAGATTGCTCAGTCTATTCTGTCAAACAACTCTCATCCAAGACCACGACCAA  
ACCCTAGATCATTTGAACCAACCATACTTATAAAAGACCTTGAACGTATGAAATCAGTTAAACCGACGACATCAAAGCTACCAAGAATTCTTCAATTA  
GGTTGCCCTCAAGAATTGTTTCGCCACAAAATAAGTTTTGAAGATTCAATTCTTGAGTTGAAAAGCTCAGGATGCCATGGTGGTTATCTTGATTACAT  
TCTGAGCTCTTTACAAGACGCAGAAGTCCCAAAGACGAGGATGATAAAGCTTGCTCTCCCCATCTCAAAGGTGGAATCTGAGCAGAAATCTGGACC  
TGGTCGCAAATCATACTGAAGAAGCATGGTATCTCAACCCATCGTGAGGTTCCGACTCATATTGGTATCTCAGCAAACCATATAAAGGTTTTGGATG  
ACTTCATCTCACAGATAAAGTCTGACATAGTTGATGTTGACTTGCCTCAAATAAAACAGCAAGATGATGAAACAGCTGGGTTGTCTGCATCCCTGAG  
TCTTGATTTTCATGGAGTCAAATTTAGGACTGACAAGTCTACAGCAATCTCATACTTCTATCAAGTTTTATCAAACGAAATTGTTTTGAACAGCATGA  
GGAGACGATCCACTAGAGAATATGCATTAGGTTACACATCAATCAGAGGTGTTTATTTTATAGTAGCCCCCGGACCACAGTTAAGGACTGAGTCAAAT  
GTTGAATTTATAAAGATAATATCATTAGTTCCTGGTATATCAAATGGTCTCTCATCACCTTGGCACTCGGAGGGGGATCACTGGGAATCTGATTGGTTG  
TCTGTGGACACAGATAGATTGAAACATTGGCAACGATCAAGAGATCGAACCATAATGTGTACAGTATCTAATGCAGAGCGTTTAGTAAGACCAGGTG  
TTAAACTCCGTGATGCAATAAAGGTGGAGTTGGAGAGCAATAATCATGCATTAATGACATTAACATATCTTGAGAATAAACAGACAACATCCACAAC  
AATCAGACAATCAGATATCTGTGGATGAAGTCATTAGGTGACAAGGATTTCAAAGATCTGCTAAAAAAGATGCCACAAAGAGTTAACTCAATTATCC  
AATCCTCGATGCTTCAGAAAGCAGTCGAAACTTGCATCAGAATCTCAAAGACAGACCTGACTGAGCTTGTCACAGTTGGTAAGGTGATTAGAGATG  
ATGATACTGGGAACACTACGATGAGTCAACTACCGGTGTAGCTAACCTAATGCCACGACTTTTCACTTATGGTGGTCCTGTCCCTTTGTCATACAATCTCA  
ATGAAATCTATTGGTGTATGGCTTATAACAAGGATAGACAGAACAAAACACAAGATGCTATGAGAATTCTCGATAAAATATTAAAGGAAGAGCAGAA  
ATATGACAACGAAATAAATAGCAGACTAAAACCAGAAGCAAAAGTGAACATTTGCTCGGAACAACGACAATACAAGATGATATAAATCACATACAT  
ACAGACAAGCCTGAAAGCCACTATTTTAGTTACCGAGCCGTCCAAGTTGGCATCTCCTTACAAGATTACATATAGAAAACAGGGGTGAACACGGAT  
CTTGGCTCAACAATCAAAGACTCTCTGATATACTCTCAAAGAATCTGTCAGAATTTTCAACATTCAAAGCATCAGTCAAAAAGATCGAACGATCAAT  
TGACCCAAATGATCTGAATGAAATAAAGAAAATAGGCCAAAGGACAAAGGCTATTGAACTTGTTGCAGAGATAGTGCAGGATGAGAACTTCAAAC

ATCTATGGATGTGGCTATGACCTTCTCTGGGATAAACAACAGGAATTTTGAAATTTTAATACAAATATTCAAAAAGAATCAAATTGGTGGCGTTCGTG  
AAATAATAATCCTCATAATAAAGGCAAGGATATTGTTTAATATAGTGGAGGAGGTTGCAAGACTCTTAAGCAAATCTGACTCAAGGGAGATCCTGACA  
AAGGGGAAAGACAAACGATTGATGATGAGATCTGATTATGAAGCAGTTTTGTCTCCTTTGATAAAGGAACACCAATCCAAATTGTTAAGGAATCAT  
ATGACATGACCACATGGGCTCAAAAGTTCATACCAACAATCTTCATCCCTTTATTTGAGCACCCTTCCGGGAGTTTCCAGGCATGATTGATTTATCAC  
GGCTTATTTTCTTATCACATTGGAATAAGAAAATGGAATATCCAAAAGGTTTGCTAGAACAAATGGATTAAACATCCCACTATTAAACATGACTCTGAGG  
CGGTCCAGTCGCATAAGGAAGAATTCATTA AAACTGGCAAACCTTATTTTGTCAACCACTCAAACATGTGTCAAGGGATACCTCATTATAACTCAACA  
GTGCTGGCTCTTGCTTGCTGAGTCTCCGTGATTCTGTTGTTTAAATCATGTCTCAAGCAACTGAATGTTCAACAACACATACAATGGAAGACTCGAGT  
AGGTTCCGATGATAAAGGAACTATAATTGGAATCGACAGATCAAAATCAGATTCATACTTCCAATATATTCTTCTTGGTCAATGTGAGAGGGCAGCAG  
AGCGTCTCTTCTCCATGGAGCTTTCGGTGAAGTCAGCTAGTGGACATCTAATGTATGAGCTGAACTCAGCCTTCATGGCCAACCTGGAACTTTATCA  
CCAACAATAAAGTTTCGCTTGTCATCAACAGACACTATCGGCACATCTTCATGTACATCATTTATAAATGAGTCTTACTCGAGGATAAGACAAATGAG  
AGAGAATGGATGTAGTTCAATTGTGTGTTTATTTCGCACACTCACTAAATATGGACCATTTCTATAATATCTTTTCAACTGGTTTTGGTATGGAAAATGAT  
GTATCAATGATCTTCAAGTGTCCCCCTAGTGAAATACCATATGATTTTGGAATCTACCCATTGTATGATGTTGACCTCCAAGATATTGTCGGCCCTGAGT  
ATCATAATTATAGAATATTGAAACAAAACCCGAAATCAAATTTGTGCAAACCTGCTCTACACTGAGATCAACTCCAGAAATAAAGATGAGTTATTTCCA  
GCAGAAGATGCACCCCTATTAAAGAAGGATCACTTTGGTATACATCAAGGGCTCGTCAGACAGCTTGAGAACATGAAGACACGACTAAATGCGAAA  
TCTGAAGATGTAGAAAAGTTCTTTGAAGAAAACCCGTTCTTAATGATTTCGAGGTCCCGAAACGCTGGAGGAAACAAAATATTCCATCATCTCAAAGT  
TGTTCACAAAGGGTGCTGCAGAATCACTCAGGAGAACCTCAGCAGCAATTTACATCGGCAGGTTGTCAGCTTTTAAGACATCTGAATCCTGGATAGC  
ACCCTATGATATTCAAACAGTTTTTTGATCTTGAAAGTGGAGAATCAGACATTAAAACAACATATATAAAAACAACATACTCGGAGTTTCTAAAAAGAT  
CTCTAACAAAAGTCGAAAATTCTAAGAGCTCCATTGATTTAGAATCTATGAAGAGGATAATATTCCCACAATGGAAATCTTTTGATGTTGTATCGACAT  
TTGTGGGTAGGTTTGGTGCAGTTAAGACTTCAACAAAGCATTACTCACAAGCAGTTAGGACATGGACAGTCAACAATTTTAACTATGAGTTCAGTTC  
TAGCTTGAAATCAATAATAGAGACCAGCTTCGGCCTTTCTCAAGATGCGACAGAGGAGGACATTGCTGAATTCAAAAAGAATGATGTCAATGAAACTC  
TCAAGCATTGATCAGTTCAAAGATGAGTGTAATCAAAAAACTTGAGACCACTGGATGTTTTCTATTACATGACAAAAATTTATAAGTCTTCTAGAAC  
ATCCAAAATACAAACATTTGCCAACGGTCCAACAACCTAGTGGTTTACATATGACAGCTCTAGCATTGAAGAGATATAATCATATGCCTGGTGCCTCAG  
TCCAACTTGATGTTGGGATGGACGAGGATGACTTATACGAAGAAACCTCATTGAGCAATAAGCTTGACAAGATAAAATTATTTTACAACATATCAGTC  
ATGAAACTCAATGATTTAATCACAGGGAATGTTTCTGATTTTGACATGGTGAGCGAACTGGATCACTTAGTGACGAGTGTGCGACAATAATCCGGT  
CTATAAGATCCCTATCAGGGTTCGATAACATAACTCAGAAGACACTGAAGATGGCAGCTTGCCAACTCCTTCAGAAGTCTGAATTGAAAGCGAAATT  
ACTTTCATGGCGGAGCATAAATTATAGCTACATAAAGAAACAAATCAAACGGATCTTACCATCTGGGTCAGTCAAATGGTCCGGTGACCTATCAATAT

TAGTGAAGCTCAGAAGATGAGTGCTTCACTTTGAACGAGAGTAATGGGTCAAGATTCATTGTCGCAAGAGAGGTGAATGATTTGTCCTCAATATATAG  
ATCACTCCGATCTATGTGTTCAATATTGGACTTTGAATTCACAACTATGTTTGTGAGGTGTAAATTGGATGTTGGTGATGTGTGCTTATCATCAAATTCC  
AAATCTTTGATAAAATGTGAGATAAAGGGAGTTGAAGGGTTGAAATTGAAGATGAATCTGACACCAAACCTTCGATTTAGAAGATTGACTGACATGC  
AATCTTTTGATGTAAATTCACACACAACAAGAAAACAGGTGAAATAGAGGTGTATTTGACTGAAAATGGCATGAGGACTGCAACAATTTGTCACAG  
CAACGGAAATTACTATCCAGTCGAAATACCACCTGGTTACCACCTGACACATAGGGTTGAATACCTGGGTGTCGACTTGGAGAGCATCTTCAGAAAT  
AGGTCATGGTTCCTATAACTTTTCGTCTGCCAATGATGAACGAGAAAGAAAGACTTAGATTTTTAAATGAGTGTGTTGACTACGACATTATCTTATCTCA  
GACAACAAAATCGATGCAGCGGATACATGATTATATGGAGGTCAGAGAAGAAGTTAATGAAGAATCATTTAGTGTGATCCGTGACCATATGCAGATG  
ATCAGGACATATGATACAAATACATATGAAGGGGTGAATATGATGGAAGTTTTTCAGGCAAACAATGGACTCAACAGACATGCCCACAAGTTTGACAA  
AATTCTCAGAAAACCTTGAAGACTGGGCTCAAGACGTCCAGGATAGCCTCGATAATGAAATACAAAATTTAGTTAGTGAAGAAACACTTGAATTGA  
CAAGAGGCCTTGGTTACAAAAAACCGGCACCAAAGCGTGCAATGGCGACCATCTCTGGATTGCAACAGGGGTCAATCCTCAAAGATAGAGTTCTTG  
ATTGTTTCTTCCAATCCCAAAACATAAGAAACGAAAGTTCAAATCAGCTTCCACATATGTTTGTGTTGGTTGGATCAACAATCTCTTGAGGCCACAAAA  
TTTCCAGATTCTTTACTGACTGAACTTAAGAACCATATAATAAAATCAATTGTGATGTCATCTGGGGCAACCCCAAATTATATAAGAAATAAGATAACC  
GAAAGTATGACCTATTCAATACCCATTGAGATGCTTTATAATTTGTTAACTCCAGAACAATAACTACAACAAACATCATGGAAGAGATTCTGAATGA  
GACCAATGATGATTACAATTCTGAAAGTGGTGATAGTGATCTAGATGTCTAGTGAAGAGGCTCTTAGTGAGGATTAGGGTGAAGTGAAGTCAAGGTT  
TGTGTCTGGTT

> Cb\_clean\_k141\_61155

GTGATTCGTTGTTTAAATCATGTCTCAAGCAACTGAATGTTCAACAACACATACAATGGAAGACTCGAGTAGGTTCCGATGATAAAGGAACTATAATT  
GGAATCGACAGATCAAAATCAGATTCATACTTCCAATATATTCTTCTTGGTCAATGTGAGAGGGCAGCAGAACGTCTCTTCTCCATGGAGCTTTCGGT  
GAAGTCAGCTAGTGGACATCTAATGTATGAGCTGAACTCAGCCTTCATGGCTAACCTGGAAACTTTATCACCAACAATAAAGTTTCGCTTGTGCATCA  
ACAGACACTATCGGCAC

> Cb\_clean\_k141\_13335

CCCTGGGATGTCATCTTTTGCAAAATTCTTATTCTTGTACATTGCAACAAGAAAATGGAGTACCCTAAAGGTTTAATTGAACAGTGGATCAAGCACC  
CATCTACAAAACATGAATCAAAAAACATTGAGCAACACAAGGAGTCTTTCTTTGAAAATGGTGAGCCTTTTTTTGTCAATCATTCAAATATGTGCCAA  
GGCATTCTCATTACAATTCAACAGTCCTCGCACTCTCTTGTCTCAGTCTTCGTGATTCATTGTTTAACTCATGTCTGAAACAGCTTGGTCGGACAAA

GTCCATATTTTGGAAACTCGAGTTG

> Cb\_clean\_k141\_15719

TGTCAAAGAATTTGTCTGAATTTGCTACTTTCAAAGCATCTGTTAAGAAGATAGAACGGAAGGTTGATCCTTTAGATCTTAATGAAGTATCAAAGATC  
GGTCAAAGAACAAAAGCAATTGAACTTGTAGCAGAGTTGGTTCAAACGAGAACTTCAAAGTCAATGGAAGTTGCCATGTCTTATTCTGGAATT  
AATAATTCAAACCTTTGAAATAATAATTCAAATATTTAAGAAAAATCAGATTGGAGGTGTTTCGAGAGATAATAATTCTTTTAATAAAAGCAAGAATTTTA  
TTCAACATAGTTGAGGAAATATGCAGACTACTGAGTAAATCAGATGCGAGAGAGATCCTCACAAAAGGTAAAGACAAACGGCTAATGATGAGGTCT  
GATTATGAAGAAGTTTGTTCATCTTTTGAAGGGGAACACCTGTCCAGATA

> Cb\_clean\_k141\_26880

GTCTGATCTGGAAAAAATGAAGTCTGTCAAACCAACTACAAACAACTTCCAAGAATATTACAGCTCGGGTCCCCATCGAAGATCATAAAATCAACT  
GACAAATTTGAAGAATCTATAAACAAATTGAGGTCTTCTGGTTCACATGGTGGTTATTTGGATTATATATTGAGTTCGCTTATGGTGGACCCAAACCCA  
AAGGATAGATTAATACAATTAGCCCTTCCAATTAGTAAGGTTGAAGATGAACAGAAGTCAGGGCCCGGTAGGAAATCTTATATGAAGAAGCATGGTAT  
AACAAATGGCTAGAGAAGTCCCAACACATATTGGTGTATCACCACAGCACATAAAGGTTCTTGATGATTTTATGACTGACTGCTCAAACAGCATAATTG  
AGGTTGACCTTCCACAGATTAAACAACAAGATGACTCAGAAACAGGTATATCAGCATTACCCACACTGGATGATATTGAATCAAGATTCAGATCAGA  
CAAGTTTACT

> Cb\_clean\_k141\_6617

CCCCACAAAACCTGAAAAAGAATTTAACAAAATGGATAGAACTACCATTGCGCAAAGCATCACAAACCAGCATGGAGCAGCAACCAAAGTCTTTGA  
TATCATTGCTGGTACGACAATTTTTGATTATATGCCTGAGACAACTGGACAATACTCTCAGTTTCGACGATGCATGCATGATATCATTGTATGGCTTTG  
ATTGATTCTTCACATTATCAACACACTGAACTCAAGCTTTCAGATTTTGGCATATCAGTCTCAGACAAAAAGCTAAATCAACAGAAACCTGACTTGTT  
CACTGTTGATGAGAAGATAATCTCTATTGGTGAAGTTGTTTGCACATATTCACCTGAGTCTTCAATTAAGGAGAAGATATCAAAGTATGACCCCTTCAT  
CTCAACGCTCGAACAAACATGGGTTTGTATGTGACAATGACTGTTTCATTGTGTGACCTCACCAGCCCAGAGTGGCAATCTTCGCTCCCAAGAATTTCT  
GATATATTCATCGAAATTTTTGAAGATCTTCTAAGAACCTTGAGATTTATACACACAAATCCCAAATTTGCATCTATAAGGAAAAATGAATCTGGTCTT  
TATAGTGTCGACAGATTTCAATTCAAGTTGGAGGATAATCATCTATCATCATTGATTGAAGAAGCAACAGGGTGTTCTATGGATTCTGCAAAAATTGAT  
GCTAAACTCATTGGGTCATCTAGGGAGGATGATCAACAGTATATTGACACTATTGCAAAATCAATCATTGACAAGCAGATGCATGAACGACCAAGGC

CAAATCCAAGATCTTTTGAGCCTGAGATTCTCTTGTCTGACTTGGAAGATGAAATCTGTCAAACCAACTACAAACAAGCTTCCAAGAATATTACA  
GCTTGGGTCTCCATCAAAGATCATAAAATCAACTGATAAATTCGAAGAATCTATTGACAAGTTGAGATCTTCTGGCTCACATGGTGGCTATTTAGATTA  
TATATTGAGTTCGCTTATGGTAGATCCAAACCCAAAGGACAGATTGATACAATTGGCCCTTCCAATCAGTAAGGTTGAGGACGAACAAAGGTCAGGA  
CCCGGTAGGAAATCTTATATGAAGAAGCATGGGATAACAATGGCTAGAGAAGTCCCTACACATATTGGTGTCTCACCACAACATATAAAGGTTCTTGA  
TGAATTCATGACTGATTGCTCGAACAGCATAACTGAGGTTGACCTTCCGCAAATTAAACAGCAGGATGACTCAGAGACAGGTATATCAGCATTACC  
AACTGGATGATATCGAATCACGGTTTAGATCTGACAAGTTTACTGCAATTGCATATTTCTACCAATGCATCTCAAATGAGATAGTTTTAAATAGCATG  
AGGAGAAGGTCCACACGCCAGTATGCTATTGGATTTTCAGGCTTGGATGGTATTTATTTTATAATAGCTCCAGGTCCTCAACTGCGAACCGAGTCAAA  
TGTTGAGTTTGTGAAGATAATCTCACTTCATCCAGGTGTTCCACATGGGTTATCAGCACCTTGGCACCTCGAAGGCGACCATTGGGAATCAGACTGG  
TTGTCAGTTGACACAGATAGGCTCAAACACTGGCAAAGATCACGCGACAGAACAATCATGTGCACCTTATCAAACGTGAGAGGCTAGTTCGACCT  
GGAGTGAACTCCGTGATGCCATGAAAGAAGAGTTGAACTCATACAATCATGCTCTGCTGGTTCTCACATACATTGAGAACAAGCAAACCATCA  
ACAACAAATCAAACAATAAGATACCTTTGGATGAAATCACTGGGTGATAAAACTTCAAGGGGTTGTTGAAGAAGATGCCCCAGAGAGTAACTCT  
GTCATCCAATCAACAATGCTTCAGCGATCGGTGAATACTTGTGTGGAGATATCTCGAACTGATCTAACCCAGCTCGTCACTGTTGGCAGAACATTGAG  
GGATGATGAACTGGACACTATGACGAATCTACTACAGGAGTTACAAATTTGATGCCAGACTGTTACCCTTGGAGGTCCAGTTCCAATTTCTTACA  
ATCTGAATGAGATATACTGGTGTATAGCTTACAACAAGGACAGACAGAACAAAACCTCAAGATTCTATGAAAATTTTAGACAAGATCCTTTTAGAGGA  
AGGGAAATTTGATGATGAACTGTCAAGCCGGAAGACTAATGAAGCGAAGGTCAACTACTTCCTTGGAAACAACGACAACAGATCAAGACATTGAAC  
ACATACACTCTCAGAACCCAGAAAGTCATTATTACAGCTACAGAGCTGTTCAAGTTGGCATCTCACTCCAAGATAAACACCCTGAAAATCGAGGTGA  
CAATGGCTCATGGATGAATAGTCAGAGAATGTCAAATATACTGTCAAAGAATTTGTCTGAGTTTGCTACTTTCAAAGCATCTGTCAAAAAGATCGAAC  
GGAAGATTGATCCTTTGGACCTTAATGAGGTATCAAAGATTGGCCAAAGAACAAAAGCAATCGAACTAGTAGCAGAGTTGGTTCAGAACGAGAAAC  
TTCAAACGTCAATGGAAGTTGCCATGTCTTACTCTGGGATCAATAACTCAAACCTTGAAATAATAATTCAAATATTTAAGAAAAATCAGATTGGAGGT  
GTTTCGGGAGATAATAATTCCTTTGATAAAAGCAAGGATCTTGTTTAATATAGTTGAAGAAATCTGTAGACTATTGAGTAAATCAGACGCACGAGAGAT  
CCTCACAAAGGGTAAAGACAAGCGGTTGATGATGAGATCTGACTATGAAGAAGTTTTGTCTCTTTTGAAAAAGGAACACCTGTCCAGATAATAAA  
AGAATCTTACGACATGACAACATGGGCACAAAAATTCATACCAACAATCTTCATACCTTTATATCAGCATCATTTCAAAGAGTTTCCTGGGATGTCCTC  
TTTTGCAAAATCTTATTCTTATCACATTGCAACAAGAAAATGGAGTACCCTAAAGGCTTGATTGAGCAGTGGATCAAGCACCCATCTATAAACATG  
AGTCAAAAAACATTCAGCAACACAAGAATTCCTTCTTTGAGAATGGTGAGCCCTTTTTTGTCAATCATTCAAATATGTGCCAAGGCATTCTCTACTAC  
AACTCAACAGTCTTGCCTCTCTTGTCTCAGTCTTCGTGACTCATTATTCGACTCATGTCTGAAGCAGCTTGGTCGGTCAAGGTCCATATTTTGAA  
AACTCGAGTTGGATCTGATGATAAAGGAACTATAATCGGTCTAGATAAGTCAAAATCTGATAGCTACTATCAATATGTTCTTCTGGGACAATGTGAGA



GAGCGTCCGAGCGGCTTCATTCAATGGAGCTCTCTGTGAAATCTGCTAGTGGTCACCTGATGTATGAATTGAATTCTGCATACATGGCAAATCTTGAG  
ACTCTATCACCAACAATCAAGTTTGCCTGTGCTTCCACCGACACAATCGGCACAGACTCATGCTCGAAGTTTATAAATGAGTCTTATTCCAGAATTAG  
ACAGATGCGCGAGAATGGTTGCAGCTCCATTTTGTGCTCATTGCGCATTCTATAAACTCAGATCACTTCTACAAAGTTTTTTCAACTGGATTCCGGTC  
AAGAGAATGATGTTGTCAACACATTTGACTTCCAAAAGAGGAAATACCATTCGATTTTGGAATCTACCCAACATATGATATAGATCTTCAAGATCTA  
ATTGGCCCAGATTTCTACAATTACAGGATTGTCAAGTCAAACCCAAACTCACCAGTTGTCAAGCTTCTGTTTACTGAAATAAACCGTGAACGCAACG  
ACGAGCTGTTCCCATCAGATGATCAACCACTACTAAAGAAAGACCATTTTGGAATACACCAAGGGTTAGTTAGACAACCTGAGAACATGCGGAAGA  
GACTTAATGCCAACCCAGATGATGTTGAGGATTTTTTTCAACGAAATCCATTTTAAATGATTTCGTGGCCAGAGACACTGGAGGAAACCAAGTACTC  
AATAATCTCAAACTGTTCAACAAAGGAGCATCTGAATCTCTTAGAAGGACATCACCAGCCATCTACATTGGCAGGTTGTCGGCATTCAAAGCTTCA  
AAGGCATGGACTGCACCTTATGAGTCTCAACGAATTATTGATCCTGAAACCAATGAGATTGAGTACATTGACACATATATAAAAACCACTATTCTGA  
GTT

> Cb\_clean\_contig\_1357

CGCTGAACAGCGGTTGGCGAAAGCTCTGCACCTACAGGCCGACATTTCTTCCTTTGTCCCGAGCGGATCAAAGGGTTTTTCATGGTTTGGGAGAGTT  
GGTACTCCCTACCCCTTCCGCCGAAGAAGTCGCTTTCCGTTCTTCTTTTCTTGGTGGCAAGCGCATTTCGCACCTTGCCAAAGAGGGAGAAGAACAG  
CCGGTTTTCTGCTTGGTGCCAGTCAAATGCCGAACGAAAGAAGGCATTGAGACTGGCCGAGGTGAAACGCCAGAAATTCCGATTGTCTTCGTTGGT  
GGCAGACCCTCTTCGTGTACTCGGATGTCAAATTCCTGAGACATTGGATGGTGTAGTCTCTTTTGCTCGCGGCCTCTTCGTTTCTCTTCGCGTCGCT  
CTGTGGTCCGTAGGGATTTCAATTCATCGGGCCAGGTACGCTGGGAAGATTTTCTCTTGCCCTACCAGTGGTTTTATCATCAACCTGGTTGACAATAGG  
GTGAAAGTGTGCGAGGAACAGGACCGGTCCGGTGTTTCTTTCCGTGTTGATGGTAATCAGATTGCGCACTGTGGCTTAAAGGATGAGTACCTCTGTG  
CCGTCCTACAGTCCAGACTCAATCTGATACCAAATCCTGGTGAGGCAGAGTTCCTGACCATCGACTTGTTCGTTTCGAGATACGAAGAATACTTCGG  
AAGGTTCTCGCCGAGATGGATGGAACCAACTTGGACTTGTGGTCCTTAATGACCATGGCTAAAAGATGGAAGCGGGATTTCCGATGTCCTGGCAAT  
ACTTGCGTCTTATCTTTTGCGGGTGACTCAGTCTCATTACCGTTATCAATGAACAAGTCGAGTTACCGCCGGCATTGTGGTTTTCGTCTTGATGGAAA  
GGATCTATTCCATTGCGGGGTTGACCAAGTTAAAAGACTGCAATTCCAAAAGAACATTTGGAAGGCGGTTGCCAACTGGTCATTACAGGATGGTAGT  
CCGGCCGAACAGCGATTGGCCGAGAAAGTCTCTTCTTCTGCGCATGTGAGTGTCCCTTGCTGAAACCTAACCTGTTCCATCAGCTGACGAACGGTT  
TCAGGGTTTGTGCCAAGTTTTCCGGTCTGAGCGTCTTCGAACGCGGACTTGATTTACACGACCTGACCCTCGGGTTGAGGGTGGTTTTATCACCAC  
CAGGCAGGAGAGATTGTTTTGGGATACAGGAGCAAGTAGGTTGGTGTTCACACCGAAGGGCCTGGCCAAAATATTCTTCCGTAAACACAATCAAGA  
AAAATGGAGAATAGCTCTGGCTGCCGCGATTGGTTTGACCTATGATGAAGGTCTGCTCTTCTTCTCGAAGTTTCACAATGATAGTACGAAACCAGAT

GTCGTGTTGGAGGTTCTGGGGTCATCACCTACCACAAGCCGGACAAGGAAACGGTAACAAGAGTAGCTTTCATTGACGTGGAGAAACCGGTTTCA  
TCCAGGCCCATACCTCGGCTTCCCACAGTTGTTCCGCCTCTCCGCCTGTACCACCAGTGCAGGGAGTTAAGCAGAAGGGACCCAAGGTGGAAGT  
GCTGATGGTGACACGTGGCTGCTTGCTGAAGGTTCTGAAGGTAAGTCAAATAGAGCTCGCTTCAGATCTCTCTTCCCACATGATTGGTGGTTGAGAG  
TGTCGAAAGGGTCATGCCCTTTATGAATCAAGACGCATCCCGTGACGTTGGATACAGGTCCCGATCTTGGTCCCAATCTTCCCTTGTCTCAGATCCC  
TCAGAGAAGTTTGATGTCAACGCCCAAAAATACACACCTCCTAGCTCTTCCAAAGCATCAGGTTCAACACCTTTACGTGTTGATCCTGACGCCTTTA  
GAAGGCAGTTGCAAGCCAAGGCTAAGAAAGTGGGTGCGACAGCGTCTTCCCGACCTGACGCGAGGGAGGCGTATCTGAAGGGTGCCAACGAGTT  
CAAACCGGAGAAAGTTTCTCATAGAAAAGCCCTTTCTGAGCCCACTCCGTCGAAGAAACCTTCTTCTGAATGGATGTCTATTTGCGGAGCATCCTCT  
GATTATCTCTTTGATGATGATCATGAGGACGCGAGAGATTTCGACGAAATCGGACATCGAAACTAATCCCGGACCTTCTATCAGGCATTTCCGTTCTAA  
ATCGACTTCAGATTTGGAGGGTGAAACACCGTCATTGAATTTACACCACCGACCCCTGGTGATGTCTTGACTGTGCACCATCCGACACCACCTCGT  
TTGAGGGTCAATCACAGGATGAACAGACATACCGTGATTGTACCTTCACCGGGTGAGAACACGTCGAATTGGAATGTAGGTTACTCGTCATTGTCAT  
GGCCTCCAACAGAGGAACATCTGGAACCTCGAGACTCCAGAACCGCGGATATAGAAGAAAATCCCGGACCATGTGAAACCCCTTGACCCCACTTTGC  
CTCAGTTTCGAGGTCGGAGTGGTTCTCAGAGTTCAGTTGCCGCTGTCACTTCGGAGCGATCACCTTCAAGAACACGTAGGTTTCTTGGAAGATCG  
GCATCCATGGCAAAAGCGCAACGGAAGAAGTTAAGGACATTTTTGGATTTAAAGAACATGATGAGGTGTATCCGTACACTGGTAAAACTCATCTTT  
TGTTGAAAAGCATTATGAATTCCACTATGTTCTTTCTCATTTACCTAAAGACAAGAAGTGCGGTCATCAACCTTTATCAGGTGGGTTGCCGCTGCTT  
CTTTGTCCGAGCTTCAAAAATCACTTGACTGTGTCGTTAAGGCTTCCCACCCTTTCAACACCGCGCTAGTGAGTAAGTTGCGTGATGAGACAAACTC  
CTTCTTCCAGAAGATCTCTGATTCTGAGCCAGTAGGCGGTACAACCATGTCTGCCTTAGCTCACACGTTCAAGACCCTATACGCCTGTCCAAACAATG  
GATGCGGTTATGCACTGGAGGTGAAACCGGAAGATGGAATTGTAAGTGTCCATCTGACAGAGTCCCCAGACGAAATCGCCAAGAATAGGTTGTGGT  
GGGTCTTGAATGGGAATGAGATTTTGCACGGAGGGGACAAGGCTCCTGCCTCTCCAAGCACAATCTCATTTCGTTGGCTGGCAAAGGAGTATTCAA  
CACATGAGGTGATAATTGAGCCCAAACCGGACTCTATGTTATCACAAGAGAAGCCAGGGCCGTTGCGGATGCCCTCACTTTCTCAGTTTCAGAAATG  
TGTTGACAGGATTATCCCTACTGGTGGTCATTTCTCCCGCTCTGAGGTGACGACCTCAAAAATCACATCAACCAATACCTGGAGTCTACAGATGTCA  
AGATAGTAGATCCAGTGTTGGTTGCAGCGATGGCAATGAGCTTCAAGTCAAAGTTCAATTGTCCAAAAGATGTGAGCTCTTTTGCAATTGATTTTAGA  
CTTGACCGGAGGATGGTTGTTTTCTGCGCCACAGATTCCCCTGAAGACAAAAATAAGGGGAAGCTTTATTGGTGCATTGGTGGTAGTGTGATTGTCC  
ATGGCGGGCTGCTAGGTATCGAAGATGGGAAGTCTTGTTCCCCTTCACTGGATCACTATAGCAAGTTGTGGACGATGCCGCTTCCAAAATCGGGTTG  
GGTGACAGGTCATTGACGCTGAATACTTCACAAAGATCTCAACCTGGCAAAAGGCCCTCGACCGGTGTGAACCGATCGTTGTATTCTCTGAACA  
CACATTGCAACGCACACTTTACCAATACTTTGATGGTGTCACTGACAAGGTGTTATCACCATCACATACTGCAATCGTTGCTTGTGTGGTAAAATCCC  
TGATGAAATGCCCTGAGAGCGGGGTAGGTTATGCTATACAGTTCGATAGTCATGGGGCTTCGCTGTATATGTGTGACAACCGAACTCCGCAGAGGT

GAACCGGTTGTGGTACTTTCACTGGGATTTTCCTTTCGTGCATGGGGGAAGAAAATCTTATGCTCCGGAACCCAGGCAGTTTTTCTACACTGAGCAT  
CTCAACATAGATTATTCGATACCCATGCGCGAAGTTTTTGTCTGGGGAAGGTCTGCCCAAGTCCAATTCCTCACATTTGACTTTCAGGAGTCAACAGG  
AATTGTTTTTCGGTTTCCAGCAGCAAATAGATTTGTATGATGTGCCGACACCGGCATTCATGCATTCGAGAGCACATGGTGTGGCTGAACAAGCCATT  
CGTGACACAATACCCAAAATGAGAACTCTCCAGTTCAATTTTGAGCAAGTTGCCGCGATAGCCATGTGTTATAGATCAAGGATGCAATGCCCATGTCC  
GGAGTCAGCCATGGCTGTTGACTTTGACTTCGCCAATGAGCGCATTGTGTTCTTTTCGAACTTAGGCAGTGGAAGTGTCCGCTGTGAGAGTCAAATG  
TGGTGGTGTATAAATGGAGTCGGACTAGTGCACACTGGTTCTACATTCCACACCTATCACAACCAAGTCCAACCAATTCGACCCGGTGCCCGAGTAT  
GTAGGTACTGGGACGAGATTGTTTCTTTGACTTGACTGAGTTCTGCCAGCCTACGTTGGATTATTGGACATCGGATTTCCATTTGCAGCTTGACAAA  
GACGAGCAGCTACAGAGGGGCTCAGATTGCATTGGATGCGCATAGTGACCCTGTTGAGCCTTTCAGCAGGGACATTGCCATATTTTCATGCATTTGAATC  
GATCAGACAAACAGCCCAAGCGGTTCGATATAACTGTCATGAAGATTGAACATTTGATCATCATGGCATGCATATATCGTTTCGAAAATGGCATGCCCTA  
CTGTAGGCACCTCAATGATTGTCAAGTTCGATTTGTCAAATCAGAGAGTGAGGTTTGGCGTTGCAAGAGGAACGTATCCTGAGTCAGATGGCAGGAT  
GTGGTGGTATCTGCACGATGATTGCATGATCCACACGGGTAGGCCGGAAGCTTCACACCGCTAGGGTGGAAGCGCCGTTGCCTGTCAGCAGTCG  
ATTTTCCTTTCGTGCAACTACCGTCAGGCCTGTGAAATGGCCGACGGTTTTGAGAAAACCTTGGAGAAAAGACCAAAGATCCGTTTGCAAAGACAA  
GGGTGAAAACCACAATCATCATCCCCTTTTCTGCGGATCAACTTTTGACGAGAGGCACGATGAGGTATTCGTGTCCGCTTACATATGGTTCTACATCC  
AACTCATTTGCACGTTTTTATTCTCCTTTTCCCGGCCTAATCTGCGGCGAAGACCTGACGGTCACACAGAAGGGGGAGAGTATCCCGTTGCGGATGA  
GAGTTTTTTCAGCCTCATCTTCCCTCCTAGTGTGCAAGTTAGGGACTAGAGGTGACCAAGTTCCTGTTGATTATTACGCGAACGTGGCGGCACACTATG  
GTGTCCGTACACATTCCCATGTGTATAAAGACGTAACAACAGACGATCTTGAAAAGATGAAAGTCGGAGACTTTTCATCTAGTTCCGCTGGTTACCT  
GAATCTTGCGTATGCTTCTCAACTTGGTTACAAGAGACTGTTCACTCCGCATGTGGAGGTGGAAGGTCTCAAGGTGTAAGTTATACTTTATCACCAA  
GCTCAAAGTGGGTGGAAGCAACAAGGTTCAATTTCCGATTGGTTCGAAGGTTTCCTGGTCCAACCTTTCTCCCTGCGTGGATAGCCACGAGGGTCACTG  
CTGTGTATGTGCCAACTTTCAGAATTGGTGCCTGTCCGGAAGCGACATCCCGCGTTCTCACGATGGGTAAACTTATTGGAGAAAGTTAAAAACAC  
AGCAGAGTATGAGGAAGGTTGGACATCCGGCAGCTCGTCAGTTTCAGTGATCCCTGACGAGATCAAGTCGAGATGCCCCGAAATACCATCGGGTAA  
TCATCTTGAAATATTGAAGGATTACAAAACGGTGCACATCCACGGGGGGGCCGGCACTGTGCAGACCGCCATTGCCTGCGGTGCACGACCGGTTATC  
CACGACAAGACACTCGATAGAGTGTATCATAGGATGCCTGAACCAAAGGATTTCAAACAACCCTCCATTGGCAAGTTTATGGGTTGGTTGGTGTCTG  
CTGGTTTCAAAGTTGACGCGCCCATGAGGTGAGAGCATGGTGGTTGTTACAATGGTATTGGTCCCAAAAATGGAACATATGCGTACGACGCATTAGT  
TACACTTGCGAAAGCCTATACTATATGTTTCATATGTATATAACCATTGGGAACTTTTCCTCATTCTTTTCTTTACCGTTCCAGCAGTGATCTGGAGGATG  
CTTTTCTCTTCCAAGTCATTGTTTCGCCATAGTCAAAATCTGTGCGCTTGGTTTTTGGCGCTACCCTGTGTTATGCTTGCTAGATTCGAAAGTCACGTTT  
GTGGCGGGCATCTGGTCAATGCAAACTTGTGGATGGGCGCAGCACAAGATTTTCGCGGCACTTATGGAGACACGTTTCCTCGCTGGTTTGGGAGCCA

GTGCACAAGATCGTGGGAACGAAGAAGCTGACATTCCCTTTTCCCCTTGGGCATTGGAGCATGAAAGACAATCAAACCGGCAAGATCTATGAAGGT  
AGATTTGTGCGGCCCTCTGAAACGATCGGAGGAAATTTTCGTCTTGTAAGTACCACTCGTGAGTACAAGCACGGATTAAAGTCTTTTCCGGCTCCTTT  
CAATGTTGGCCACGCGGAGTCACTCGTAAGAGCACAAACACGTGGCACCATACTCATCTTCACATAATTGTGTGACCATGATGGTGCAACTTTGTGCT  
AAGAGATCGACTGCATGGACAGCATGCATGATAATGGTTGGTGCTCTGACAGGGTTGGCACTGGCACCACCAAAATTGCTCAAGGATGTTCTTTCTT  
TTCTTTTTCCTGGCAAGGATTTTGCTAACACCCCTTTTTATCGCTCGCTTGGTTTCGCCGCGTCCCTAGAAAACATCCCGCTTGAAATAGAGGGGATG  
TTAGAAGCGGCAGAACCAATGCCACAGATAGCTACACCAGAACCTACTGATCTGGCCCACCCAGATTCTTTCAGTATGTTGGTTGATGAGGTAGCGT  
TTATCCAGGCATGCGTGGAACAACTCAGGATACCCACCTTAGATAAAGGAGGCATTTGACGAAGTTTCACAGCGGACTTTAGAAAAGGAGTTGGACA  
AGGTCGACATCCCTGAAGACTCTCTGATCAGGGTGTCAAACATACCGCCAAGAGTGCACCATGAGTGGGCGCAACTGGTGGATGGTCTACACCATG  
CTATTTCTTTCGTTTCGCACAAACCGCGTCGCAGACGCGTTTGTGTTATACGTCAAAAATGCCGGTGAAAACGTATATGACTTTGTCCAGCCAATACTG  
GAGATCCTTTCTTCTTTCTGACCTTGACGCTGAGCACTCCAAGCATGCGTTCGATCGCCTGTTCAAGTGGCTTTGCGATTTCTTAGACCATGTGTG  
GGGTCTAGAGGCGTCAAAAAGAGTCAAAAACAGTGTGGGGCCTGACTGGCCTTCATCGAACTGGATTGCTTGGTGTCAAAGCCAAACTTGCAGCCA  
ATGTTGCTTATTCTGATTTTCGTGGGTAGGCAGGATTTTGAATCAGATTACAACAAATTGGTGCAAGAGGGGAAAACACCTCGCTCAGGTATATGGTGCT  
GTCAAACGATCAAACCTTGGAGGGCCTCAGAGGAGGCCTATAGGCTATGGAAAACCTCTAATGTCACAATCTGAAGCCAGCCTGCTCGGTTTCGAG  
TCAGGTGAGTTTGTGACTGATCGTGAGTATGAGACACGTGTGCAATCATACCTTGAACAAGGTGTTGCACAAGGTGCTGACGGAGTATTCTTGGCCG  
ATAAAAGACCGGAGCTGATTGCCAAGTCACAGCACCGTTATGAGCCAAAGTACCCCGCACTTACCTCTGAGGATCGTTCCATGGCTAAGGAAATAGC  
CCAAGCCATGTTTGATCAATACCCGGAAGTCTTCGCTAATTGTGATGTTCTGCCGCCAAGGGCAGTTCACAATTATGTGAAGCAAAAATATTCCCCAG  
GAACCCCGTTCATCAAGCCTGGCGGCTTCAAGTCTCGTCAGGCGATGTTTCGACGCTGGTTATGACCGCGTCATGCAACGACGAGCAATGCATTACTT  
GGAAACTGGTGAATATCCAGTACAATTCTATCATGCTTTTGTGAAATCACAAGTGGTAGATATCAAGAAGTGCTTGAGCCCCGAGGAAGGTGGGAAA  
GGAAAAGATGTTTCGCACTGTGGTCAGCCAGGATCTGTTCTCCTACTACATTGACCAATGTCTCCAAATCGAGCGCAACAAACGCATAAATTGGGATA  
CATATGGTGCAGGTATAGGTATGCCTCTTAATCAGTCAATGGAGGCAATATACAACAGAATGGCAGCTGCACAGAAGTCGAGAGGAGGCAGGTACAT  
CATCGCTGATGCAACCGCCTTCGACTCGTTTTTGCAAACCTTTCCTCTTCGAAGTAAACGCAAACCTTTGGGAACTCGGCTATAAAGATCATCCAAGC  
GGTAACGGCAAGAACCTCGCATCTGTTCTAAATGCTTCGTATCAAGCCAGACAAAATGCTTGGATAATCGGTGTGACCGAGCCGGAATATGACTCGT  
TGACTGTTTTCGTCCAAGATAGAAACAGTCGCGAAATCATACGACAACGATCCCCAAAGACAGTAATCTGTTTGGAAAGATCTCATTGACTGGGACA  
AGTACAACAGATTGCCTGCTGAACAACGTTTGAACCTACGTTGCAAAAACCTTCAACCACCTGAAGGGAAGACGGTGGTAACCTGGGATCCTGCTCTCC  
GCCCATCCAGATCAAACCTGGATGGGTAAATACGAATATGGTGTCTTATCTGATGTTGACAAGAAATCTTTGAACATCAAACATTCACATACGATCCTT  
CAAATTTTGAAGACATGTATCAAGACATATTATCGGTTTCACGATCAAATTACAAACTGATGTCAAACGTACATGCGAAGAATCGTGGTGGAAAGCACT

GGAGGGTCAGACACATCAAACGTTAATACACACGCCTTTAAGGCAGGTGTGATTACGCTTGGTGTCAAACCACTGGCAGAGCTCCAAAGGAGTTC  
TTCCAGTACAATGACCTTGCCAATACATCAGATGACACCATCTGGCAATCGGGTGGTAAACATGGCCTTAACACTGTTGAAGATGTCGAAGTTTTCC  
GGCATCATTGTCAATCAGTGGGTATCCATCTGGAAATAGAGACAACGAAGAATATATCACAAGTAGAATACCTGTCAAAATTCGTTTCGTGTTCCCACT  
TCAGAGGATTTCAGCAGCATTGAAAGTCTGGAGATCCCAGAAAATCAAGGCTGCTTCAAATGCCCACAAACAATTAGGCCTAGCTGTTCCCTACTTCAT  
GGGAGCAGTTCAACAACCCAAACTTTGTGTCGTCGTACAAAACCCTTCTGCGATCTTGCTCCGAAGGTCGGCGTTTAGGTATTACCAATCAAACGCAA  
ACCATTGGAAGTACGTCTCAGTAGAGAGGGGTGCCGGTCATGCTCAAAGCACCGCCTTCCTCCCTGAGTTGTATGGCAAGTTCGCACAAGAGTGGT  
GCGACGACATCAATGATCTTCTAATAACAACAGAAGATCCACCGGAAGTTTAAAGTTACAAATGGACAATTTGGATTGCAATGTGTGCAACAAGTAGA  
TCCGAGAGCGTCACAACAACAGCTCTCGCCGCGTCAAGTTGCTTTCCCTCTCTGGTTGAGAGGAAACATGTTCCCTAGTTACTATAGGGTACTTGAC  
ATCCACATGAACGTCGCTAAAGTAGATCCAGAAAGACACGCCAAATTCCTTCGTAAGCTTGAAAGAGGTTGGCGAGGTTGGGAGGAACTGCTACGC  
GAAGGAGTAGACAATCTCTACGCCTTAACTGATTCCATTCCAGATGAGATCAGCAAGAAGTTCCAACCCGGCCTCGATATGCTCTATGCAGAGCAAC  
CGTTCTACACGAAGAACAAGGTAGTCGAAAAATTTGTTTACCTAAAACCTGCTGGAAGAAAGCCCAGAAACAGAAGTTACCTTTTCAGACTTCTCTG  
CTCGAATTCAAGAGTCACCATATGCTTCGGTATGTGATCCCTATCACTTCTGGGAGAAGTTAGGGGAACCTGAATTCAAAGAGCAACTCATGTCTGA  
AGATCCTCTGAAGATACAAGGTCTCGTTTTGCTCATAAGCACCATGTACCTATTGACAAACACAGCTGAGTCGGTAGTATTAGCCATTCCGTTTGTCTG  
GCTTGTTCTACAACTTTTCCTGTGGTCCTTTATCGGGCTCAATAAGGTATATGGGTTGTAAACACCATGTACTGGCATTCTGAGGGCAAGTCGTCTA  
GAGAGATATCTCGAATCATGCCCCGAGACCCTTACATGGTGACAAAACAGTTTGTGCTGCGTTTTGCATTGACTTTGTGCCATCACAGCTGGGTTACTTG  
GCTCTTATCCCGCTGCACATACTATCTTTGCTTCCAGTGTTGTTTGAAGCACTTGGAAGCAATGGTATGTGGCAGGGGAGGTCAAGAATGTGATGG  
AACCTCCTGGCAGTACCGTAAACAAGTGGGATCAATACGCAGACGAGTACATAGAAGCTCTGCGTTCATCTCCGACAAATAGAAAATACGTTGCTGC  
CAAGACTTCAACTGGCAAATCGACCTGGTTCATAGCTGCCTTGTGGAAAGCTAGACACCGCCAAAAGGTCAGAAAGTTTTGGCTTGTTGAACCTCG  
ATTGGTGTTGCGAGACAACACGCACATACCATTTCGATGCACCTTATCAAGTGCTGAAGGACAACATACAAGTTTCAAACACCCATGATATCCACATAT  
TGACGTATGGACATTTACAGTCAAGGTTGTTGGATATAGACAATGAACGTGATATCGTCATCTTTGACGAGTTCCACGAACAACAGGGTGAAATGATC  
CTTGGAATCGATAAGTGCAAGGCGCCAATCTTTCTTCTCTCGGCCACGCCAGCCGAAATACCATCTCTGCACGGTTCGGGAACCTTTGGTCCCAAACA  
TTGACAGACGACATCCGATCCAAATCCACCAAGTGGACGATGGGATGGGTGTTGTTGACATGTTTATGGAAGCCAAAACCGCTACCCCTGATTTATG  
CAAGAGAGCGATGATTATTGTGCCAACTCATAAGGAAGTTGCAAAAGTTATCGCTTCCCTTGATTACCTCAAGGTAGGCAAGTGTCTCCTCTATCTG  
CCCGCGATCGCGTGGTACAGGATGAGGGAATACTGGTGTGCACCCCTACGTCCAAACGGGTCTAGATGTAAAACCAACAGAGAAATGGTTCGTGTTGG  
CTGTGGAAGAAAGATTTGTTTTGGATAAGGGGCGTCCAGTTTTCCCACTTCCGTGGACAGACAAGGACATAAACCAACAGAGAATTGGTTCGTGTTGG  
AAGATTAAGACCCGGAATCGTCTTCCAACCGAAATCAGCAGGTTCCGGAAGAAAGGTGTGGTATACCCGAGTCCACATCTATTCCAACATAAAGCT

GTCGCGGAACATTTTAAGGTCCCACAGCTTGCACCAATCTCGGGTGCCTTTACGGCAGATTTACCTTTCTTAAGGCCGAACAAGAAAGTGTTAAATT  
CTTTACCCGTCGAGAAATCAGTCGTTTTTATACATTCACTTGCGTTAAGTGGTGTGCGCCAAGAGCAGTGGCAACACATGTATACGAGATCCGTGCA  
AGGGCACACTCTCGGCAACGATTACAAAAACGTAGATAGACTACTCAATCATTCAAGGTACAAACGATCAAAGCTAGTCTCGTATGGAGACGCACTT  
TATCATCTTTACCGAGAACATGCAGTCCAGTACGGATTTGTCAAGGAAGACGGAAGTACAGAATACAAGTCTGCCAAGCCAATGTCTGTCATCAATG  
GAAAGTGGATAGAGTTAGAACAATCGCCGACGACTAAGATTGATGTTCAAGAGTTACCACAACAGGAACTTTCAAACAAATATCAATCTTTGCAATC  
ATCAATAAGGCGATGTCGAGACTCCATTATTTTCAAAGCCAAGGACATGCCTGGGCATGACTTGGAACGTCTCAACTCCATCTTAGCGTTTTGAGCA  
CTAAAAGGCGGCACTTG TAGCTGAAATGCTACATTTAAAGACAACCGCAGTTTTGTGTTACCCAATTGACGTTTGACTTTTGTGACACACGCTATTTC  
TGTTGTTGCCTCCCGACCTCTTTCGTGACATTTGTACATCCGTTTCGTTACCTTTCTTTCTTTGTCCGTAAAAC TACAAACAAACGCAGCGGTTAATG  
CCGCGGTAATAAACCGGATTCACATGCTAACGCATGGTGTGGTTGGCCGTTTGCCAACATAATCACTAGGGTGGTTAATTCCACCCTATGAGAAGGCT  
CTCGATTGACTTCTTGCCGTACGGGTTGGTCTTGTAGGTCTCGATGCCGTCGTGCACGGCTGGGTAGGAGGTGATGTGGGACAGGAACTTGGA CTGT  
GGCACAATTTCTCTTAGCCAACTCCTTACCTCACC ACTCTTCTCTCTCACTCGCGCACTGCAAGGTTATCGCTCTCTGTACTAAAGGTATTACCAATTC  
GTGCTCTCCGCCATTACACCACTGGCCCGTTCACCTGGGTGCAAAGGCTTAGCGTAGCCTTTGCTGGCCTCTCACTGGCTTTGCCGATTGCCTGAA  
TCG

> Cb\_clean\_contig\_1024

TGAGGTCCCCCTGCCTTGTCAAAGGCGGCCGTGCTTACCCGTCTTAAACAGGTACCCCCGAGGGGACAAGCACGCGCACTTGCGGAGGAGAGATC  
AACTATGGACGCCCCGTATGGGGAGAGAGTCCGTAGGGGGCGCCAGCCGGCGCACGACACACCGCGCGAAACCTACTCAGTAAGCTGAAGTAGGAG  
GTTTCGCAGACGAGAAGAACCCCGTCTTCCACCAAACAAACGGGACCAGGGCTGCAGGGCAGCCGAGACTCCGCTAGGACGACCTCGCCACGCGG  
ACGAGGACAGGGAACCGGTGACCTAACGCCGAACGTAAGTTCGGCGCCACGCCAACCTAAAGAGCGAGCCCGAAGGTACGCTCTAGAAGGCTTA  
ACTATCAAACGCTTGAAAGCGTTGTAGGAAAGCGGATCCCTGGCGGTCTGAAAAGACCGACCGCCACCCAAAGGTCCAAAGAGACCTCCAACCT  
TTCTACGCTGGTCGAGGACAGGCTGAGCCTGTAACGACTGTCATCGAGACCGGTGGCGCGCGGCAAGACCGCATAGCCGAGGCGGTGAAGCCGCC  
GCTCGTACTTGAAAGTCTCAAGTACGCCGAGATCGAAGCCGAGGTCACTCGGACGTAGAACCCACCTCGAGCGAAGTTTCGAAAGGACGAAAGCA  
CGCTCCCACAACGGACCGGCAGCACGACAAACAGCTGCCTGGTGGATGTGACCCTGGAGGTACGGGAACCACCACCCCTCCTGAGGTGCTTAC  
CTCCTTCCACTTTCACGTGAGTCCCTAAGGAAACACGTGGAGTTAATCTCAGCTACCGACTGAAAACGGCCGGTTTTGGACTCGTTAATGACTGCC  
CAAGAGGGGTAGTCACTATTGAGAACGGGAGTACGACAGCTTATGAGGCAGTCGTCACCGTTGATTAACACTCTGGCATCGCGCCCGCGTACGGCC  
CAGCGGGCGGCGACGTAGGACTGAAGGCAGAGTAAGGGGAAAGAGAGGTAAGTGCCCATCATCTGGCCGCGAGTGACAGAAGAGTCACCAACGG

TCGGACGAAGGGAATCCACAGCGTCCTGGCGCACACGACCAGGAACCAACTCACACTGCGCGAGGGCAGCGCAAAGGATGGTATCGGCGACGTC  
CAACAGAAGGTTGTCAAGTCGCCCTACCAGATCAACAGAAGTCTGCCAGTCAAACGAGCTGATCCTGTCTGCTGTTGGAGGACCAA  
CAAGCAGCCAATCCTTACCACCAAGGTACGAATAGAGGCATTCTGTCAAAGGCCCAAGGGTATCCCAACGGTAAGTTGGAATACCCATAGCCCTCA  
ACTTCCCTGCGGAAGGAACCTCCTTATAACGGAGGCGCCAACCGCCCACCCCCTTGGGAAGGGGACCACCCGACTGAACTACTGACTGGAAGCCC  
AAAAAGGACTGTCTA

> Cb\_clean\_k141\_35317

CACGGCCAACCACACCATGCGTTAGCATGTGAATCCGGTTTATTACCGCGGCATTAACCGCTGCGTTTGTGTTGTAGTTTTACGGACAAAGAAAGAAA  
GGTAACGAACGGATGTGACAAATGTACGAAAGAGGTCGGGAGGCAACAACAGAAATAGCGTGTCTGACAAAAGTCAAACGTCAATTGGGTAACA  
CAAACTGCGGTTGTCTTTAAATGTAGCATTTAGCTACAAGTGCCGCCTTTTAGTGCTCAAAACGCTAAGATGGAGTTGAGACGTTCCAAGTCATG  
CCCAGGCATGTCCTTGGCTTTGAAAATAATGGAGTCTCGACATCGCCTTATTGATGATTGCAAAGATTGATATTTGTTTGAAAGTTCCTGTTGTGGTAA  
CTCTTGAACATCAATCTTAGTCGTCGGCGATTGTTCTAACTCTATCCACTTTCCATTGATGACAGACATTGGCTTGGCAGACTTGTATTCTGTACTTCC  
GTCTTCCTTGACAAATCCGTACTGGACTGCATGTTCTCGGTAAAGATGATAAAGTGCGTCTCCATACGAGACTAGCTTTGATCGTTTGTACCTTGAAT  
GATTGAGTAGTCTATCTACGTTTTTGTAAATCGTTGCCGAGAGTGTGCCCTTGCACGGATCTCGTATACATGTGTTGCCACTGCTCTTGGCGCACACCA  
CTTAACGCAAGTGAATGTATAAAAACGACTGATTTCTCGACGGGTAAAGAATTTAACACTTTCTTGTTTCGGCCTTAAGAAAGGTAAATCTGCCGTAA  
AGGCACCCGAGATTGGTGCAAGCTGTGGGACCTTAAATGTTCCGCGACAGCTTTATGTTGGAATAGATGTGGACTCGGGTATACCACACCTTTCTT  
TCCGGAACCTGCTGATTTTCGGTTGGAAGACGATTCCGGGTCTTAATCTTCCAACACGACCAATTCTCTGTTGGTTTATGTCCTTGTCTGTCCACGGAA  
GTGGGAAAACCTGGACGCCCCTTATCCAAAACGAAATCTTTTCCACAGTCGATCAAGAGATCGGGTGGTGGTTTTACATCTAGACCCGTTTGGACGTA  
GGGGGTGCACACCAGTATTCCCTCATCCTGTACCACGCGATCGCGGGCAGATAGAGGAGACACTTTGCCTACCTTGAGGTAATCAAGGGAAGCGAT  
AACTTTTGCAACTTCCTTATGAGTTGGCACAATAATCATCGCTCTCTTGATATAATCAGGGTAGCGGTTTTTGGCTTCCATAAACATGTCAACAACAC  
CCATCCCATCGTCCACTTGGTGGATTTGGATCGGATGTCGTCTGTCAATGTTTGGGACCAAAGTTCCGGAACCGTGCAGAGATGGTATTTTCGGCTGG  
CGTGGCCGAGAGAAGAAAGATTGGCGCCTTGCACTTATCGAGTCCAAGGATCATTTACCCTGTTGTTTCGTGGAACCTCGTCAAAGATGACGATATCA  
CGTTCATTGTCTATATCCAACAACCTTGACTGTAAATGTCCATACGTCAATATGTGGATATCATGGGTGTTTGAACCTTGTATGTTGTCTTCAGCACTT  
GATAAGGTGCATCGAATGGTATGTGCGTGTTGTCTCGCAACACCAATCGAGGTTCAACAAGCCAAAACCTTTCTGACCTTTTGGCGGTGTCTAGCTTT  
CCACAAGGCAGCTATGAACCAGGTCGATTTGCCAGTTGAAGTCTTGGCAGCAACGTATTTTCTATTTGTTCGGAGATGAACGCAGAGCTTCTATGTAC  
TCGTCTGCGTATTGATCCCCTTGTGTTACGGTACTGCCAGGAGGTTCCATCACATTCTTGACCTCCCCTGCCACATACCATGCTTTTCCAAGTGCTTCG

AACAACACTGGAAGCAAAGATAGTATGTGCAGCGGGATAAGAGCCAAGTAACCCAGCTGTGATGGCACAAAGTCAATGCAAAAACGCAGCAAACCTG  
TTTTGTCAACCATGTAAGGGTCTCGGGGCATGATTCGAGATATCTCTCTAGACGACTTGCCCTCAGAATGCCAGTACATGGTGTTTAACAACCCATATAC  
CTTATTGAGCCCGATAAAGGACCACAGGAAAAGTTTGTAGAACAAGCCGACAAACGGAATGGCTAATACTACCGACTCAGCTGTGTTTGTCAATAG  
GTACATGGTGCTTATGAGCAAAACGAGACCTTGTATCTTCAGAGGATCTTCAGACATGAGTTGCTCTTTGAATTCAGGTTCCCCTAACTTCTCCCAGA  
AGTGATAGGGATCACATACCGAAGCATATGGTGACTCTTGAATTCGAGCAGAGAAGTCTGAAAAGGTAACCTTCTGTTTCTGGGCTTTCTTCCAGCAG  
TTTATAGGTAAACAAATTTTTCGACTACCTTGTCTTCGTGTAGAACGGTTGCTCTGCATAGAGCATATCGAGGCCGGGTTGGAACCTTCTTGCTGATCT  
CATCTGGAATGGAATCAGTTAAGGCGTAGAGATTGTCTACTCCTTCGCGTAGCAGTTCCCTCCCAACCTCGCCAACCTCTTTCAAGCTTACGAAGGAA  
TTTGCGTGTCTTTCTGGATCTACTTTAGCGACGTTTATGTGGATGTCAAGTACCCTATAGTAACTAGGGAACATGTTTCCTCTCAACCAGGAGAGGA  
AAGCAACTTGACGCGGCGAGAGCTGTTGTTGTGACGCTCTCGGATCTACTTGTTTCGACACATTGCAATCCAAATTGTCCATTGTAACTTTAACTTC  
CGGTGGATCTTCTGTTGTATTAGAAGATCATTGATGTGTCGCGACCACTCTTGTGCGAACTTGCCATACAACCTCAGGGAGGAAGGCGGTGCTTTGAG  
CATGACCGGCACCCCTCTCTACTGAGACGTACTTCCAATGGTTTTCGTTTGGATTGGTAATACCTAAACGCCGACCTTCGGAGCAAGATCGCAGAAGG  
GTTTTGTACGACGACAAAGTTTGGGTTGTTGAACTGCTCCCATGAAGTAGGAACAGCTAGGCCTAATTGTTTGTGGGCATTGTAAGCAGCCTTGATT  
TTCTGGGATCTCCAGACTTTCAATGCTGCTGAATCCTCTGAAGTGGGAACACGAACGAATTTTGACAGGTATTCTACTTGTGATATATTCTTCGTTGTC  
TCTATTTCCAGATGGATACCCACTGATTGACAATGATGCCGGAACACTTCGACATCTTCAACAGTGTTAAGGCCATGTTTACCACCCGATTGCCAGAT  
GGTGTCTATCTGATGTATTGGCAAGGTCATTGTACTGGAAGAACTCCTTTGGAGCTCTGCCAGTGGTTTGACACCAAGCGTAAATCACACCTGCCTTA  
AAGGCGTGTGTATTAACGTTTGATGTGTCTGACCCTCCAGTGCTTCCACCACGATTCTTCGCATGTACGTTTGACATCAGTTTGTAAATTTGATCGTGAA  
ACCGATAATATGTCTTGATACATGTCTTCAAAATTTGAAGGATCGTATGTGAATGTTTGATGTTCAAAGAATTTCTTGTCAACATCAGATAAGACACCA  
TATTCGTATTTACCCATCCAGTTTGATCTGGATGGGCGGAGAGCAGGATCCCAGGTTACCACCGTCTTCCCTTCAGGTGGTTGAAGTTTTGCAACGTA  
GTTCAAACGTTGTTTCAGCAGGCAATCTGTTGTACTTGTCCCAGTCAATGAGATCTTCCAAACAGATTACTGTCTTTGGGGATCGTTGTCTGATGATTT  
CGCGACTGTTTCTATCTTGGACGCAAACAGTCAACGAGTCATATTCCGGCTCGGTACACCCGATTATCCAAGCATTTTGTCTGGCTTGATACGAAGCA  
TTTAGAACAGATGCGAGGTTCTTGCCGTTACCGCTTGATGATCTTTATAGCCGAGTTCCCAAAGGTTTTCGTTTACTTTCGAAGAGGAAAGGTTTGC  
AAAACGAGTCGAAGGCGGTTGCATCAGCGATGATGTACCTGCCTCCTCTCGACTTCTGTGCAGCTGCCATTCTGTTGTATATTGCCTCCATTGACTGA  
TTAAGAGGCATACCTATACCTGCACCATATGTATCCCAATTTATGCGTTTGTGCGCTCGATTTGGAGACATTGGTCAATGTAGTAGGAGAACAGATCC  
TGGCTGACCACAGTGCGAACATCTTTTCCTTTCCACCTTCCCTCGGGGCTCAAGCACTTCTTGATATCTACCACTTGTGATTTACAAAAGCATGATA  
GAATTGTACTGGATATTACCAAGTTTCCAAGTAATGCATTGCTCGTCGTTGCATGACGCGGTCATAACCAGCGTCGAACATCGCCTGACGAGACTTGA  
AGCCGCCAGGCTTGATGAACGGGGTTCTGGGGAATATTTTGTCTCACATAATTGTGAACTGCCCTTGGCGGCAGAACATCACAATTAGCGAAGAC



TTCCGGGTATTGATCAAACATGGCTTGGGCTATTTTCCTTAGCCATGGAACGATCCTCAGAGGTAAGTGCAGGGTACTTTGGCTCATAACGGTGCTGTG  
ACTTGGCAATCAGCTCCGGTCTTTTATCGGCCAAGAATACTCCGTACGACCTTGTGCAACACCTTGTTCAAGGTATGATTGCACACGTGTCTCATA  
TCACGATCAGTCACAACTCACCTGACTCGAAACCGAGCAGGCTGGCTTCAGATTGTGACATTAGAGGTTTTCCATAGCCTATAGGCCTCCTCTGAG  
GCCCTCCAAGGTTTGATCGTTTGACAGCACCATATACCTGAGCGAGGTGTTTTCCCTCTTGACCAATTTGTTGTAATCTGATTCAAAATCCTGCCTAC  
CCACGAAATCAGAATAAGCAACATTGGCTGCAAGTTTGGCTTTGACACCAAGCAATCCAGTTCGATGAAGGCCAGTCAGGCCCCACACTGTTTTGA  
CTCTTTTTGACGCCTCTAGACCCACACATGGTCTAAGAAATCGCAAAGCCACTTGAACAGGCGATCGAACGCATGCTTGGAGTGCTCAGCTGCAA  
GGTGCAGAAAGAAGGAAAGGATCTCCAGTATTGGCTGGACAAAGTCATATACGTTTTTACCGGCATTTTTGACGTATAACACAAACGCGTCTGCGAC  
GCGGTTTGTGCGAACGAAAGAAATAGCATGGTGTAGACCATCCACCAGTTGCGCCCACTCATGGTGCCTCTTGGCGGTATGTTTGACACCCTGATC  
AGAGAGTCTTCAGGGATGTCGACCTTGTCCAACCTCTTTTCTAAAGTCCGCTGTGAACTTCGTCAAATGCCTCCTTATCTAAGGTGGGTATCCTGAG  
TTGTTCCACGCATGCCTGGATAAACGCTACCTCATCAACCAACATACTGAAAGAATCTGGGTGGGCCAGATCAGTAGGTTCTGGTGTAGCTATCTGTG  
GCATTGGTTCTGCCGCTTCTAACATCCCCTCTATTTCAAGCGGGATGTTTTCTAGGGACGCGGCGAAACCAAGCGAGCGATAAAAAGGGGTGTTGGC  
AAAATCCTTGCCAGGAAAAAGAAAAGAAAGAACATCCTTGAGCAATTTTGGTGGTGCCAGTGCCAACCCTGTCAGAGCACCAACCATTATCATGCA  
TGCTGTCCATGCAGTCGATCTCTTAGCACAAAGTTGCACCATCATGGTCACACAATTATGTGAAGATGAGTATGGTGCCACGTGTTGTGCTCTTACGA  
GTGACTCCGCGTGGCCAACATTGAAAGGAGCCGGAAGAAAGACTTAAATCCGTGCTTGTACTCACGAGTGGTACTTACAAGACGAAAATTTCCCTCCGA  
TCGTTTCAGAGGGGCGGACAAATCTACCTTCATAGATCTTGCCGTTTTGATTGTCTTTCATGCTCCAATGCCCAAGGGGAAAAGGGAATGTCAGCTT  
CTTCGTTCCCACGATCTTGTGCACTGGCTCCCAAACCAGCGAGGAACGTGTCTCCATAAGTGCCGCGAAATCTTGTGCTGCGCCCATCCACAAGTTT  
TGCATTGACCAGATGCCCGCCACAAACGTGACTTTTGAATCTAGCAAGCATAACACAGGGTAGCGCCAAAAACCAAGCGCACAGATTTTGACTATG  
GCGAACAATGACTTGGAAGAGAAAAGCATCCTCCAGATCACTGCTGGAACGGTAAAGAAAAGAATGAGGAAAAGTTCCCAATGGTTATATACATAT  
GAACATATAGTATAGGCTTTTCGCAAGTGTAATAATGCGTCGTACGCATAGTTCCATTTTTGGGACCAATACCATTGTAACAACCACCATGCTCTCACC  
TCAATGGGCGCGTCAACTTTGAAACCAGCAGACACCAACCAACCCATAAACTTGCCAATGGAGGGTGTGTTGAAATCCTTTGGTTTACGGCATCCTAT  
GATACACTCTATCGAGTGTCTTGTGCTGGATAACCGGTCGTGCACCGCAGGCAATGGCGGTCTGCACAGTGCCGGCCCCCCCCGTGGATGTGCACCGT  
TTTGTAATCCTTCAATATTTCAAGATGATTACCCGATGGTATTTTCGGGGCATCTCGACTTGATCTCGTCAGGGATCACTGAAACTGACGAGCTGCCGG  
ATGTCCAACCTTCCTCATACTCTGCTGTGTTTTTAACCTTCTCCAATAAGTTTAAACCCATCGTGAGAACGCGGGATGTCGCTTCCGGACAGCGACCA  
ATTCTGAAAGTTGGCACATACACAGCAGTGACCCTCGTGGCTATCCACGCAGGGAGAAAGTTGGACCAGGAAACCTTCGACCAATCGGAAATGAA  
CCTTGTGCTTCCACCCACTTTGAGCTTGGTGATAAAGTATAACTTACACCTTGAGACCTTTCCACCTCCACATGCGGAGTGAACAGTCTCTTGTAAC  
CAAGTTGAGAAGCATACGCAAGATTCAGGTAACCAGCGGAACTAGATGAAAAGTCTCCGACTTTCATCTTTTCAAGATCGTCTGTTGTTACGTCTTT

ATACACATGGGAATGTGTACGGACACCATAGTGTGCCGCCACGTTTCGCGTAATAATCAACAGGAACTTGGTCACTCTAGTCCCTAACTTGCACACT  
AGGAGGGAAGATGAGGCTGAAAACTCTCATCCGCAACGGGATACTCTCCCCCTTCTGTGTGACCGTCAGGTCTTCGCCGCAGATTAGGCCGGGAA  
AAGGAGAAATAAAACGTGCAAATGAGTTGGATGTAGAACCATATGTAAGCGGACACGAATACCTCATCGTGCCTCTCGTCAAAAGTTGATCCGCAG  
AAAAGGGGATGATGATTGTGGTTTTACCCCTTGTCTTTGCAAACGGATCTTTGGTCTTTTCTCCAAGTTTTCTCAAAACCGTCGGCCATTCACAGGC  
CTGACGGTGAGTTGCACGAAAGGAAAATCGACTGCTGACAGGCAACGGCGCTTCCACCCTAGCGGTGTGAAGCTTTTCCGGCCTACCCGTGTGGAT  
CATGCAATCATCGTGCAGATACCACCACATCCTGCCATCTGACTCAGGATACGTTCTCTTGCAACGCCAAACCTCACTCTCTGATTTGACAAATCGA  
ACTTGACAATCATTGAGGTGCCTACAGTAGGGCATGCCATTTTCGAACGATATATGCATGCCATGATGATCAAATGTTCAATCTTCATGACAGTTATAT  
CGACCGCTTGGGCTGTTTGTCTGATCGATTCAAATGCATGAAATATGGCAATGTCCCTGCTGAAAGGCTCAACAGGGTCACTATGCGCATCCAATGC  
AATCTGAGCCCTCTGTAGCTGCTCGTCTTTGTCAAGCTGCAAATGGAAATCCGATGTCCAATAATCCAACGTAGGCTGGCAGAACTCAGTCAAGTCA  
AAAGAAACAATCTCGTCCAGTACCTACATACTCGGGCACC GGTCGAAATTGGTTGGACTGGTTGTGATAGGTGTGGAATGTAGAACCAGTGTGC  
ACTAGTCCGACTCCATTTATACACCACCACATTTGACCTCGACAGCGGACACTTCCACTGCCTAAGTTCGAAAAGAACACAATGCGCTCATTGGCGA  
AGTCAAAGTCAACAGCCATGGCTGACTCCGGACATGGGCATTGCATCCTTGATCTATAACACATGGCTATCGCGGCAACTTGCTCAAAATTGAACTG  
GAGAGTTCTCATTTTGGGTATTGTGTACGAATGGCTTGTTGAGCCACACCATGTGCTCTCGAATGCATGAATGCCGGTGTGCGCACATCATACAAAT  
CTATTTGCTGCTGGAAACCGAAAAACAATTCCTGTTGACTCCTGAAAGTCAAATGTGAGGAATTGGACTTGGGCAGACCTTCCCCAGCAAAAACCTT  
CGCGCATGGGTATCGAATAATCTATGTTGAGATGCTCAGTGTAGAAAACTGCCTGGGTTCCGGAGCATAAGATTTTCTTCCCCCATGCACGAAAGG  
AAAATCCCAGTGAAAGTACCACAACCGGTTACCTCTGCGGAGTTCGGTTGTCGACACATATACAGCGAAGCCCCATGACTATCGAACTGTATAGCA  
TAACCTACCCCGCTCTCAGGGCATTTCATCAGGGATTTTACCACACAAGCAACGATTGCAGTATGTGATGGTGATAACACCTTGTCAGTGACACCATC  
AAAGTATTGGTAAAGTGTGCGTTGCAATGTGTGTTGAGAGAATACAACGATCGGTTACACCGGTCGAGGGCCTTTTGCCAGGTTGAGATCTTTGTG  
AAGTATTGAGCGTCGAATGACCTGTCCACCCAACCGATTTTGAAGCGGCATCGTCCACAACCTTGCTATAGTGATCCAGTGAAGGGGAACAAGAC  
TTCCCATCTTCGATACCTAGCAGCCCGCCATGGACAATGACACTACCACCAATGCACCAATAAAGCTTCCCCCTATTTTTGTCTTCAGGGGAATCTGT  
GGCGCAGAAAAACAACCATCCTCCGGTCAAGTCTAAAATCAATTGCAAAAGAGCTGACATCTTTTGGACAATTGAACTTTGACTTGAAGCTCATTGCC  
ATCGCTGCAACCAACACTGGATCTACTATCTTGACATCTGTAGACTCCAGGTATTGGTTGATGTGATTTTTGAGGTCGTCGACCTCAGAGCGGGAGA  
AATGACCACCAGTAGGGATAATCCTGTCAACACATTTCTGAAACTGAGAAAGTGAGGGCATCGCGAACGGCCCTGGCTTCTCTTGTGATAACATAGA  
GTCCGGTTTGGGCTCAATTATCACCTCATGTGTTGAATACTCCTTTGCCAGCCAACCGAATGAGATTGTGCTTGGAGAGGCAGGAGCCTTGTCCCCT  
CCGTGCAAAATCTCATTCCCATTCAAGACCCACCACAACCTATTCTTGGCGATTTCTGTCTGGGGACTCTGTCAGATGGAACAGTACAATCCATCTTC  
CGTTTTACCTCCAGTGCATAACCGCATCCATTGTTTGGACAGGCGTATAGGGTCTTGAACGTGTGAGCTAAGGCAGACATGGTTGTACCGCCTACT

GGCTCAGAATCAGAGATCTTCTGGAAGAAGGAGTTTGTCTCATCACGCAACTTACTCACTAGCGCGGTGTTGAAAGGGTGGGAAGCCTTAACGACA  
CAGTCAAGTGATTTTTGAAGCTCGGACAAAGAAGCAGCGGCAACCCACCTGATAAAGGTTGATGACCGCCACTTCTTGTCTTTAGGTAAATGAGAA  
AGAACATAGTGGAATTCATAATGCTTTTCAACAAAAGATGAGTTTTTACCAGTGTACGGATACACCTCATCATGTTCTTTAAATCCAAAAATGTCCTTA  
ACTTCTTCCGTTGCGCTTTTGCCATGGATGCCGATCTTCCCAAGAAACCTACGTGTTCTTGAAGGTGATCGCTCCGAAGTGACAGCGGCAACTGAAC  
TCTGAGAACCACTCCGACCTCGAAACTGAGGCAAAGTGGGGTCAAGGGTTTACATGGTCCGGGATTTTCTTCTATATCCGCGGTTCTGGAGTCTCG  
AGGTTCCAGATGTTCTCTGTTGGAGGCCATGCAAATGACGAGTAACCTACATTCCAATTTCGACGTGTTCTCACCCGGTGAAGGTACAATCACGGTA  
TGTCTGTTTCATCCTGTGATTGACCCTCAAACGAGGTGGTGTCTGGATGGTGCACAGTCAAGACATCACCAGGGGTCTGGTGGTGTGAAATTCAATGAC  
GGTGTTCACCTCCAAATCTGAAGTCGATTTAGAACGGAAATGCCTGATAGAAGGTCCGGGATTAGTTTCGATGTCCGATTTTCGTCTGAATCTCTCGC  
GTCCTCATGATCATCATCAAAGAGATAATCAGAGGATGCTCGCGAAATAGACATCCATTTCAGAAGAAGGTTTCTTCGACGGAGTGGGCTCAGAAAG  
GGCTTTTCTATGAGAACTTTCTCCGGTTTGAACCTCGTTGGCACCTTCAGATACGCCTCCCTCGCGTCAGGTCGGGAAGACGCTGTCTGCACCCACT  
TTCTTAGCCTTGGCTTGCAACTGCCTTCTAAAGGCGTCAGGATCAACACGTAAAGGTGTTGAACCTGATGCTTTGGAAGAGCTAGGAGGTGTGTATT  
TTTGGGCGTTGACATCAAACCTTCTCTGAGGGATCTGAGACAAGGGAAGATTGGGACCAAGATCGGGACCTGTATCCAACGTCACGGGATGCGTCTT  
GATTCATAAAGGGCATGACCCTTTCGGACACTCTCAACCACCAATCATGTGGGAAGAGAGATCTGAAGCGAGCTCTATTTGACTTACCTTCAGAACC  
TTCAGCAAGCAGCCACGTGTACCATCAGCCAGTTCACCTTGGGTCCCTTCTGCTTAACTCCCTGCACTGGTGGTACAGGCGGAGGAGGCGGAAC  
AACTGTGGGAAGCCGAGGTATGGGCCTGGATGAAACCGGTTTCTCCACGTCAATGAAAGCTACTCTTGTTACCGTTTCCTTGTCCGGCTTGTGGTAG  
GGTGATGACCCCAAGAACCTCCAACACGACATCTGGTTTCGTACTATCATTGTGAAACTTCGAGAAGAAGAGCAGACCTTCATCATAGGTCAAACCA  
ATCGCGGCAGCCAGAGCTATTCTCCATTTTCTTGATTGTGTTTACGGAAGAATATTTTGGCCAGGCCCCTTCGGTGTGAACACCAACCTACTTGCTCC  
TGTATCCCAAAACAATCTCTCCTGCCTGGTGGTGTGATGAAACCACCTCAACCCGAGGGTCAGGTCGTGTGAAATCAAGTCCGCGTTTCGAAGACGCT  
CAGACCGGAAAACCTTGGCACAAACCTGAAACCGTTCGTCAGCTGATGGAACAGGTTAGGTTTCAGACAAGGGACACTCACATGCGCAGAAGAAG  
AGACTTTCTCGGCCAATCGCTGTTTCGGCCGGAAGTACCATCCTGAATGACCAGTTTGGCAACCGCCTTCCAAATGTTCTTTTGGAAATTGCAGTCTTTTA  
ACTTGGTCAACCCCGCAATGGAATAGATCCTTTCCATCAAGACGAAACCACAATGCCGGCGGTAACCTCGACTTGTTTATTGATAACGGTGAATGAGA  
CTGAGTCACCCGCAAAAGATAAGACGCAAGTATTGCCAGGACATCCGAAATCCCGCTTCCATCTTTTAGCCATGGTCATTAAGGACCACAAGTCCAA  
GTTGGTTCCATCCATCTCGGCGAGGAACCTTCCGAAGTATTCTTCGTATCTCGAACGGAACAAGTCGATGGTCAGGAACTCTGCCTCACCAGGATTT  
GGTATCAGATTGAGTCTGGACTGTAGGACGGCACAGAGGTACTCATCCTTTAAGCCACAGTGCGCAATCTGATTACCATCAACACGGAAAGAAACA  
CCGGACCCGGTCTGTTCCTCGACACTTTCACCTATTGTCAACCAGGTTGATGATAAAACCACTGGTAGGGCAAGAGAAAATCTTCCAGCGTACC  
TGGCCCGATGAATGAAATCCCTACGGACCACAGAGCGACGCGAAGAGGAACCGAAGAGGCCGCGAGCAAAAGAGACTACACCATCCAATGTCTCA

GGAATTTGACATCCGAGTACACGAAGAGGGTCTGCCACCAACGAAGACAATCGGAATTTCTGGCGTTTCACCTCGGCCAGTCTCAATGCCTTCTTTC  
GTTTCGGCATTGACTGGCACCAAGCAGAAAACCGGCTGTTCTTCTCCCTCTTTGGCAAGGTGCGAATGCGCTTGCCACCAAGAAAAGAAGAACCG  
AAAGCGACTTCTTCGGCGGAAGGGGTAGGGAGTACC
