# Supplementary material for: Characterization of the Mycovirome from the Plant-Pathogenic Fungus Cercospora beticola
Source: Viruses. 2021 Sep 24;13(10):1915. doi: 10.3390/v13101915 (PMC8537984; doi:10.3390/v13101915)
Supplement: Supplementary file 1 [file viruses-13-01915-s001.zip]

Archive with 7 entries (7 files):
- viruses-1368835-supplementary Figure S1.pdf
- viruses-1368835-supplementary Table S1.pdf
- viruses-1368835-supplementary Table S2.pdf
- viruses-1368835-supplementary Table S3.pdf
- viruses-1368835-supplementary Table S4.pdf
- viruses-1368835-supplementary Table S5.pdf
- viruses-1368835-supplementary Table S6.pdf
